# Supplementary material for: Proximity-dependent biotin identification (BioID) reveals a dynamic LSD1–CoREST interactome during embryonic stem cell differentiation
Source: Royal Society of Chemistry journal article supplement (doi:10.1039/d1mo00236h), 2021-10-14
Supplement: d1mo00236h1.pdf [file d1mo00236h1.pdf]

**Supplementary information**

**Proximity-dependent biotin identification (BioID) reveals a dynamic LSD1-CoREST interactome during embryonic stem cell differentiation**

Claire E Barnes<sup>1</sup>, David A English<sup>1</sup>, Megan Broderick<sup>1</sup>, Mark O Collins<sup>2,3</sup> and Shaun M Cowley<sup>1,\*</sup>

<sup>1</sup> Department of Molecular and Cell biology, Henry Wellcome Building, University of Leicester, Leicester, LE1 9HN, United Kingdom

<sup>2</sup> School of Biosciences, the University of Sheffield, Western Bank, Sheffield S10 2TN

<sup>3</sup> Faculty of Science Mass Spectrometry Centre, University of Sheffield, Brook Hill Road, Sheffield, S3 7HF, United Kingdom.

\*To whom correspondence should be addressed

List of supplementary data:

**Supplementary Figure 1** – Expression of BirA\*-tagged CoREST complex members permits biotinylation of proximal proteins.

**Supplemental Figure 2** – Western blot for the indicated proteins using whole cell protein extracts isolated during sampling for BioID in ES cells.

**Supplementary Table 1** – 293T BioID dataset

**Supplementary Table 2** – ESC LSD1 BioID dataset

**Supplementary Table 3** – 293T and ESC overlapping targets

**Supplementary Table 4** – Antibodies used in this study

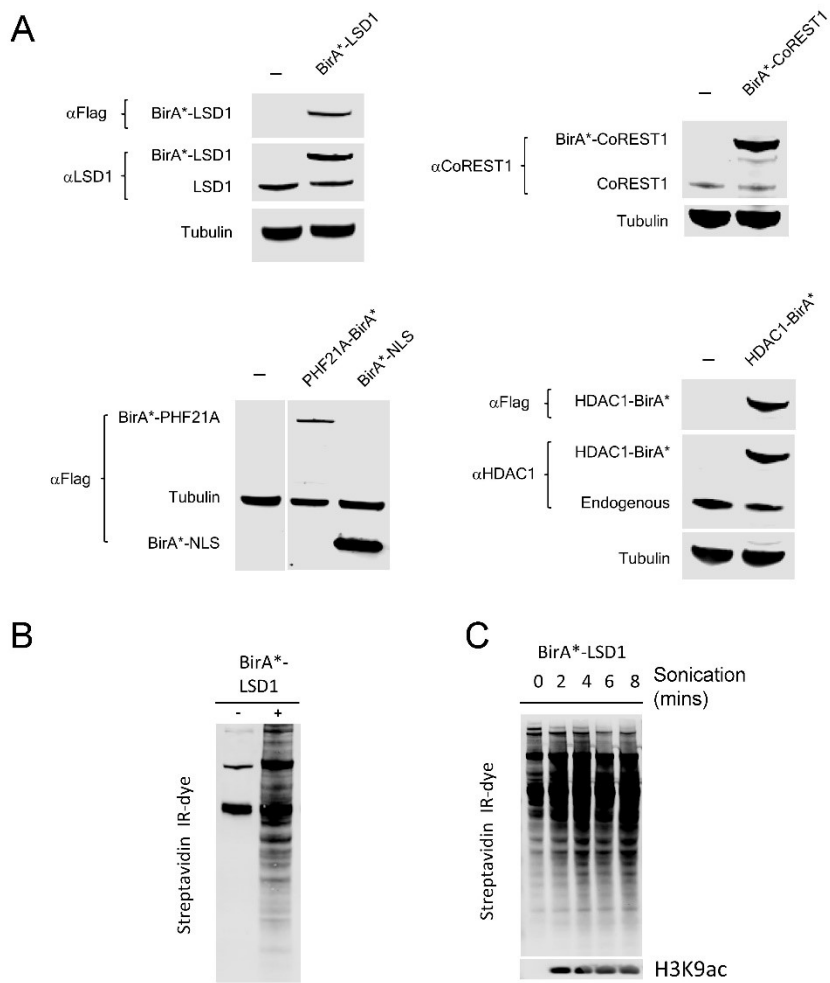

**Supplementary Figure 1.** Expression of BirA\*-tagged CoREST complex members permits biotinylation of proximal proteins. **A**, western blots for the indicated proteins using either anti-FLAG, or antibodies specific to the protein of interest, as indicated. **B**, Biotinylated proteins, with and without the addition of exogenous biotin, detected using streptavidin conjugated to an infra-red<sup>800</sup> dye. **C**, Whole cell protein extracts were made from pellets sonicated for the indicated times, with biotinylated proteins detected using streptavidin conjugated to an infra-red<sup>800</sup> dye.

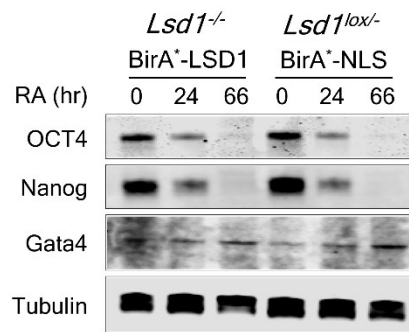

**Supplemental Figure 2.** Western blot for the indicated proteins using whole cell protein extracts isolated during sampling for BioID in ES cells. The time-course of retinoic acid (RA) treatment is indicated. Proteins were extracted from either control (*Lsd1<sup>Lox/-</sup>*) and *Lsd1* knockout (*Lsd1<sup>-/-</sup>*) ES cells.
