# Supplementary material for: Proximity-dependent biotin identification (BioID) reveals a dynamic LSD1–CoREST interactome during embryonic stem cell differentiation
Source: Royal Society of Chemistry journal article supplement (doi:10.1039/d1mo00236h), 2021-10-14
Supplement: d1mo00236h5.pdf [file d1mo00236h5.pdf]

**Supplementary Table 4.**

**Primary antibodies used for Immunoblotting.**

| Antibody          | Source | Dilution | Company    | Product No. |
|-------------------|--------|----------|------------|-------------|
| $\alpha$ -tubulin | Mouse  | 1:15000  | Sigma      | T5168       |
| CoREST1           | Mouse  | 1:1000   | Millipore  | MABN486     |
| FLAG              | Mouse  | 1:2500   | Sigma      | F1804       |
| Gata4             | Rabbit | 1:2000   | Abcam      | Ab134057    |
| H3K9Ac            | Rabbit | 1:1000   | Millipore  | 06-942      |
| HDAC1             | Rabbit | 1:2000   | Abcam      | Ab109411    |
| LSD1              | Rabbit | 1:10000  | Abcam      | Ab129195    |
| NANOG             | Rabbit | 1:2000   | Bethyl     | A300-397A   |
| OCT4              | Mouse  | 1:500    | Santa Cruz | Sc-5279     |

**Secondary antibodies used for Immunoblotting.**

| Antibody                    | Source              | Dilution | Company | Product No. |
|-----------------------------|---------------------|----------|---------|-------------|
| IRDye 800CW-Mouse           | Goat anti-mouse IgG | 1:10000  | LICOR   | 926-32210   |
| IRDye 680CW-Rabbit          | Donkey anti-Rabbit  | 1:10000  | LICOR   | 926-68023   |
| Streptavidin<br>IRDye 800CW |                     | 1:5000   | LICOR   | 926-32230   |
