# Supplementary material for: Proximity-dependent biotin identification (BioID) reveals a dynamic LSD1–CoREST interactome during embryonic stem cell differentiation
Source: Mol Omics. 2021 Oct 14;18(1):31–44. doi: 10.1039/d1mo00236h (PMC8763317; doi:10.1039/d1mo00236h)
Supplement: MO-018-D1MO00236H-s002 [file MO-018-D1MO00236H-s002.xlsx]

## Sheet: Proteins = 3 out 4 baits
	Majority.protein.IDs	Protein.names	Gene.names	id	LSD1_significant	LSD1_.Log.Student.s.T.test.p.value.LFQ.intensity.LSD1_LFQ.intensity.NLS	LSD1_Student.s.T.test.Difference.LFQ.intensity.LSD1_LFQ.intensity.NLS	LSD1_Student.s.T.test.Test.statistic.LFQ.intensity.LSD1_LFQ.intensity.NLS	HDAC1_significant	X.Log.Student.s.T.test.p.value.LFQ.intensity.HDAC1_LFQ.intensity.NLS	Student.s.T.test.Difference.LFQ.intensity.HDAC1_LFQ.intensity.NLS	Student.s.T.test.Test.statistic.LFQ.intensity.HDAC1_LFQ.intensity.NLS	PHF21A_significant	PHF21A_.Log.Student.s.T.test.p.value.LFQ.intensity.BHC80_LFQ.intensity.NLS	PHF21A_Student.s.T.test.Difference.LFQ.intensity.BHC80_LFQ.intensity.NLS	PHF21A_Student.s.T.test.Test.statistic.LFQ.intensity.BHC80_LFQ.intensity.NLS	CoREST1_significant	CoREST1..Log.Student.s.T.test.p.value.LFQ.intensity.CoREST1_LFQ.intensity.NLS	CoREST1_Student.s.T.test.Difference.LFQ.intensity.CoREST1_LFQ.intensity.NLS	CoREST1_Student.s.T.test.Test.statistic.LFQ.intensity.CoREST1_LFQ.intensity.NLS
1	O60341	Lysine-specific histone demethylase 1A	KDM1A	1434	+	4.86341	10.3066	3.67761	+	1.4804	2.37949	0.830893	+	2.5393	5.19266	1.75572	+	3.15101	5.28601	1.86748
2	P17066	Heat shock 70 kDa protein 6	HSPA6	1796	+	5.63288	8.16815	3.30684	+	5.7551	7.47417	3.10118	+	0.557897	2.61297	0.630961	+	4.71048	6.54388	2.57491
3	E9PDR0;P05166;C9JQS9;E7EX59;E7ETT1;E7ETT4;E7EUY3;E9PEC3;F8WBI9	Propionyl-CoA carboxylase beta chain, mitochondrial	PCCB	735	+	4.40126	8.2117	2.96592	+	4.63923	8.55062	3.13465	+	3.6984	9.58198	3.20425	+	4.49421	8.97317	3.19414
4	O00763	Acetyl-CoA carboxylase 2;Biotin carboxylase	ACACB	1306	+	5.02111	7.23511	2.8605	+	6.70702	7.06815	3.1164	+	5.6388	8.65907	3.66994	+	5.51177	7.76136	3.1444
5	O75362	Zinc finger protein 217	ZNF217	1483	+	5.79549	6.43602	2.7415	+	6.11942	5.43561	2.40638	+	4.70721	4.57363	1.99456	+	6.52752	7.67125	3.31824
6	Q9P2K3;B4DV59	REST corepressor 3	RCOR3	4139	+	3.52257	7.12546	2.41073	+	3.34028	5.68712	2.01394	+	3.15345	8.2321	2.64685	+	2.74785	3.98418	1.44972
7	Q9UHJ3	Scm-like with four MBT domains protein 1	SFMBT1	4191	+	4.99356	5.74896	2.37052	+	3.23417	2.49107	1.04772	+	5.09166	7.70155	3.19259	+	4.74426	5.3507	2.1958
8	Q9P0K7	Ankycorbin	RAI14	4118	+	4.00273	5.46194	2.10017	+	2.91705	3.98897	1.48047	+	2.57934	4.29313	1.54695	+	2.18233	2.37048	0.917958
9	P05165	Propionyl-CoA carboxylase alpha chain, mitochondrial	PCCA	1662	+	5.58909	4.59465	2.02498	+	7.08997	4.92021	2.27689	+	5.49911	5.85127	2.59001	+	5.46882	5.06092	2.19036
10	Q96RQ3;E9PHF7;E9PG35;F5GYT8;G5E9X5	Methylcrotonoyl-CoA carboxylase subunit alpha, mitochondrial	MCCC1	3610	+	5.27998	4.66821	2.02223	+	8.02416	4.80642	2.27826	+	6.36783	5.95002	2.73408	+	6.14114	5.069	2.2636
11	Q92618;A0A087WUJ4	Zinc finger protein 516	ZNF516	3408	+	4.86356	4.57038	1.94001	+	5.05508	4.24789	1.84159	+	4.15809	3.74214	1.61958	+	6.15161	5.93859	2.60547
12	P11498	Pyruvate carboxylase, mitochondrial	PC	1738	+	6.17563	4.26144	1.9383	+	7.6937	4.23688	2.00818	+	6.44649	5.37075	2.49407	+	6.28784	4.72224	2.13614
13	Q14687;H0Y613	Genetic suppressor element 1	GSE1	2628	+	4.63358	4.57594	1.91434	+	4.48737	3.52108	1.51874	+	1.78575	1.54533	0.634572	+	5.24088	5.10756	2.1802
14	Q8TDY2	RB1-inducible coiled-coil protein 1	RB1CC1	3331	+	3.49708	4.69554	1.78091	+	2.77985	1.94624	0.824589	+	2.64075	2.25112	0.940449	+	1.92425	1.29461	0.547751
15	Q13625	Apoptosis-stimulating of p53 protein 2	TP53BP2	2570	+	3.31163	4.79645	1.77424	+	2.57113	3.29915	1.23473	+	2.3484	3.48739	1.28589	+	1.9225	2.57852	0.946357
16	X6RLX0;Q8IUD2;G8JLD3;X6RM00	ELKS/Rab6-interacting/CAST family member 1	ERC1	3143	+	2.72878	5.31088	1.76672	+	2.28916	4.34442	1.44225	+	1.84003	4.36139	1.36781	+	1.92571	3.68932	1.21556
17	J3KN32;Q9UKL0	REST corepressor 1	RCOR1	1163	+	3.12897	4.88303	1.75991	+	2.60751	3.79916	1.37608	+	3.24048	6.8748	2.38043	+	5.39661	11.9135	4.32906
18	Q13085	Acetyl-CoA carboxylase 1;Biotin carboxylase	ACACA	2514	+	4.01357	4.3138	1.74482	+	5.10796	4.23951	1.84349	+	4.37806	5.18314	2.1708	+	5.37588	4.8491	2.10047
19	Q9P0W2;B5MDG7;K7EJR8	SWI/SNF-related matrix-associated actin-dependent regulator of chromatin subfamily E member 1-related	HMG20B	4123	+	5.84841	3.70444	1.6869	+	4.49882	3.19896	1.39817	+	4.2403	7.28029	2.82059	+	5.94861	5.03461	2.23146
20	A0A087WTW5;Q9UKL3	CASP8-associated protein 2	CASP8AP2	34	+	4.88349	3.87838	1.68655	+	4.97988	3.55949	1.57174	+	4.55668	4.61459	1.99136	+	6.39151	6.62481	2.90069
21	Q96LB3	Intraflagellar transport protein 74 homolog	IFT74	3578	+	3.29401	4.37371	1.65281	+	3.13286	2.76067	1.13273	+	2.74223	3.66082	1.40397	+	1.26918	1.08524	0.442323
22	Q96BY7	Autophagy-related protein 2 homolog B	ATG2B	3481	+	5.03142	3.72696	1.64071	+	3.77194	3.31646	1.38129	+	3.09885	2.71452	1.14241	+	3.51629	2.70226	1.14337
24	A0A087X211;Q8TCG1	Protein CIP2A	KIAA1524	161	+	4.41988	3.58979	1.53835	+	4.57978	4.0737	1.72978	+	4.1419	4.59453	1.92704	+	2.71509	2.65659	1.05992
25	Q92766;C9JU34	Ras-responsive element-binding protein 1	RREB1	3418	+	4.17016	3.58536	1.51384	+	3.11938	2.93059	1.188	+	3.63645	2.47175	1.09214	+	5.32403	4.62119	2.00912
26	Q8IUZ0	Leucine-rich repeat-containing protein 49	LRRC49	3145	+	3.84446	3.65354	1.5043	+	4.53536	4.01127	1.70268	+	3.42894	5.13122	1.97027	+	4.20287	3.72975	1.56832
27	Q9C0F1;D6RGX6	Centrosomal protein of 44 kDa	CEP44	3808	+	6.2206	3.19826	1.49004	+	1.0916	1.27859	0.489848	+	2.55708	3.15175	1.2236	+	2.37231	1.23342	0.541923
28	Q96BD5	PHD finger protein 21A	PHF21A	3472	+	3.00909	3.75853	1.43006	+	3.58713	3.70555	1.49191	+	5.38205	11.2811	4.46317	+	3.98253	4.73733	1.87593
29	Q9H6J7;E9PI12	UPF0705 protein C11orf49	C11orf49	3889	+	5.56213	3.10848	1.42336	+	6.11246	3.25493	1.51012	+	4.23297	3.83921	1.66378	+	3.55711	2.71183	1.14981
30	O75182;M0QYC5	Paired amphipathic helix protein Sin3b	SIN3B	1478	+	2.78245	3.83369	1.41527	+	3.52657	5.28176	1.95097	+	2.15399	3.65223	1.29061	+	3.11586	4.37641	1.62198
31	H3BU53		MGA	1096	+	4.83343	3.17009	1.40906	+	3.75535	3.67009	1.49996	+	1.29309	1.96352	0.709276	NA	NA	NA	NA
32	Q0PNE2;H7BZM9	Elongator complex protein 6	ELP6	2474	+	3.83485	3.34326	1.39659	+	3.33595	3.13967	1.27854	+	1.20203	2.53848	0.828349	NA	NA	NA	NA
33	P04792;F8WE04	Heat shock protein beta-1	HSPB1	1652	+	4.69504	3.14209	1.38935	+	3.59377	2.74607	1.16482	NA	NA	NA	NA	+	3.47326	2.06334	0.903962
35	Q96R06	Sperm-associated antigen 5	SPAG5	3604	+	2.84112	3.55307	1.34595	+	0.988595	1.33496	0.495574	+	4.12582	6.99719	2.70198	NA	NA	NA	NA
36	Q08378	Golgin subfamily A member 3	GOLGA3	2463	+	2.48484	3.72689	1.3356	+	2.45366	3.14644	1.17526	+	0.565227	1.88794	0.534788	NA	NA	NA	NA
37	Q9ULH7	MKL/myocardin-like protein 2	MKL2	4240	+	5.91565	2.86684	1.3348	+	6.474	3.15849	1.4821	+	4.45449	2.9823	1.34631	+	5.24071	2.67602	1.22778
38	Q7Z4H7;Q5VY60	HAUS augmin-like complex subunit 6	HAUS6	3071	+	4.97304	2.92278	1.3178	+	4.61436	2.56727	1.15607	+	3.89017	2.81535	1.24275	+	3.37004	1.68563	0.752137
39	A0A087WW06;Q96AY4	Tetratricopeptide repeat protein 28	TTC28	70	+	3.21762	3.21593	1.29103	+	3.33005	3.39636	1.36172	+	2.60398	3.2518	1.26055	+	3.67488	3.99133	1.59502
40	Q9P1Y5	Calmodulin-regulated spectrin-associated protein 3	CAMSAP3	4124	+	4.2772	2.91863	1.27608	+	3.32369	2.37485	1.01209	NA	NA	NA	NA	+	4.07392	1.94289	0.880103
41	Q96D09	G-protein coupled receptor-associated sorting protein 2	GPRASP2	3495	+	3.36807	3.09755	1.26769	+	2.77985	1.24844	0.559564	+	2.40499	2.65066	1.04979	+	3.01133	1.44243	0.643694
42	Q8IZ40	REST corepressor 2	RCOR2	3192	+	3.85968	2.96478	1.2639	+	4.08863	2.69787	1.1799	+	7.00497	4.25634	2.0327	NA	NA	NA	NA
43	P12270	Nucleoprotein TPR	TPR	1749	+	5.09115	2.7683	1.26003	+	5.73414	3.25414	1.49271	+	4.93273	2.85548	1.31915	+	6.07258	2.9549	1.37867
44	E7EMW7;O95071	E3 ubiquitin-protein ligase UBR5	UBR5	664	+	3.41228	3.02364	1.24694	+	2.65865	2.15567	0.890163	+	2.12377	2.14438	0.859272	+	3.84425	3.56842	1.4753
45	Q13501;E7EMC7	Sequestosome-1	SQSTM1	2555	+	2.68904	3.25917	1.23985	+	3.06564	1.64856	0.726618	+	3.55927	2.97075	1.27588	+	2.74167	1.51458	0.662767
46	Q9UBW7	Zinc finger MYM-type protein 2	ZMYM2	4165	+	4.94804	2.72791	1.23691	+	5.45022	3.10045	1.41467	+	2.6094	1.07266	0.489648	+	5.94116	4.35772	1.96082
47	Q60FE5;A0A087WWY3		FLNA	2915	+	4.86317	2.67959	1.21322	+	6.55952	4.51208	2.06866	+	3.47066	2.78318	1.19903	+	4.34779	3.26316	1.41135
48	O43683	Mitotic checkpoint serine/threonine-protein kinase BUB1	BUB1	1406	+	2.96332	3.03292	1.20485	+	2.44687	2.22503	0.897024	+	1.84411	2.48389	0.928461	+	1.80144	1.79347	0.706511
50	I6L8A6;Q99708	DNA endonuclease RBBP8	RBBP8	1157	+	2.22479	3.28636	1.17773	+	1.75586	1.96542	0.754362	+	1.45775	1.31524	0.535147	+	2.16042	2.42354	0.931425
51	F5H212		HIVEP1	849	+	3.36965	2.79499	1.16464	+	4.63916	4.68592	1.9534	+	3.54212	4.10711	1.67105	+	4.17363	4.14647	1.70958
53	A0A0A0MRJ3;Q8NEY1	Neuron navigator 1	NAV1	202	+	2.8213	2.7687	1.10614	+	2.83809	1.38633	0.616151	+	3.63191	2.94767	1.27351	NA	NA	NA	NA
54	O75165	DnaJ homolog subfamily C member 13	DNAJC13	1476	+	2.74089	2.79061	1.10487	+	2.37743	2.66689	1.02758	+	1.87053	1.50083	0.624926	+	2.04813	1.94485	0.774351
55	Q9UHD2	Serine/threonine-protein kinase TBK1	TBK1	4187	+	4.71438	2.42329	1.10141	+	1.6055	1.26028	0.51999	+	2.86896	2.15941	0.924457	NA	NA	NA	NA
56	P57052	Splicing regulator RBM11	RBM11	2242	+	3.08254	2.67967	1.10105	+	5.07197	3.78712	1.66719	+	5.48	4.14106	1.89518	+	4.19623	3.0356	1.3149
57	Q96T51	RUN and FYVE domain-containing protein 1	RUFY1	3634	+	4.11781	2.46943	1.09307	+	3.63489	1.96141	0.871345	+	2.47562	1.77252	0.758116	+	2.97	1.60029	0.704314
58	O43396;K7ER96	Thioredoxin-like protein 1	TXNL1	1394	+	5.87875	2.29625	1.0831	NA	NA	NA	NA	+	4.54078	1.85632	0.872084	+	5.60958	2.69674	1.25045
59	Q14789;E7EU81;H0Y867	Golgin subfamily B member 1	GOLGB1	2637	+	2.47847	2.78878	1.0754	+	0.799003	1.32277	0.468674	+	2.31223	4.62701	1.56136	NA	NA	NA	NA
60	Q7Z3T8	Zinc finger FYVE domain-containing protein 16	ZFYVE16	3063	+	6.29283	2.25307	1.07273	+	5.66331	1.78255	0.84828	+	3.50018	1.97331	0.887087	+	2.96313	1.24398	0.562331
61	Q96Q89	Kinesin-like protein KIF20B	KIF20B	3600	+	3.91805	2.4372	1.07013	+	3.63305	2.38699	1.03525	+	2.83143	2.13348	0.912431	+	3.32783	2.2022	0.94893
62	Q9NS87;C9JKA9	Kinesin-like protein KIF15	KIF15	4014	+	3.09162	2.57319	1.06556	+	1.90587	1.10803	0.478796	+	1.46251	2.05688	0.758018	NA	NA	NA	NA
64	Q8TD19	Serine/threonine-protein kinase Nek9	NEK9	3324	+	6.40992	2.20483	1.05302	+	5.35208	2.38381	1.10714	+	5.07591	2.13451	1.00917	+	3.5141	1.50511	0.683333
65	Q15149	Plectin	PLEC	2672	+	1.97345	2.92241	1.04396	+	0.976486	2.22611	0.702443	+	1.93466	2.9045	1.05684	+	2.08818	2.78973	1.02607
67	A0A087WV20;A0A087WTU9;A0A087WZY3;Q8TCU4	Alstrom syndrome protein 1	ALMS1	31	+	2.88695	2.53369	1.03542	+	3.67516	2.8245	1.19913	+	3.49822	4.55689	1.80909	+	1.29732	1.37254	0.535653
68	Q6Y7W6;I1E4Y6;E7ESB6;C9JHW1	PERQ amino acid-rich with GYF domain-containing protein 2	GIGYF2	3015	+	5.80123	2.18059	1.02979	+	5.31589	2.39802	1.11213	+	4.65502	2.75076	1.26146	+	3.67188	1.92167	0.857056
69	Q9UPU5	Ubiquitin carboxyl-terminal hydrolase 24	USP24	4273	+	4.15574	2.30061	1.02808	+	3.62273	2.03414	0.899408	+	2.42842	1.5629	0.677852	+	2.80497	2.17344	0.906439
72	P11274	Breakpoint cluster region protein	BCR	1733	+	2.41902	2.62234	1.01885	+	1.9786	2.44567	0.916965	+	1.57297	2.73147	0.948431	+	0.89271	1.43548	0.510238
73	Q9HCC0;D6RD67;D6RDF7	Methylcrotonoyl-CoA carboxylase beta chain, mitochondrial	MCCC2	3948	+	4.14426	2.27321	1.01663	+	4.93844	2.22238	1.02509	+	4.7617	3.44562	1.55543	+	5.53498	2.91207	1.33942
74	F8W9J4;Q03001;E7ERU0;E9PHM6;F6QMI7;E9PEB9	Dystonin	DST	928	+	2.04601	2.76742	1.01417	+	4.68774	3.49171	1.52376	+	1.1382	2.21298	0.743527	+	5.1827	2.77784	1.26802
75	P82094;A0A0A0MTG4;F8WF45	TATA element modulatory factor	TMF1	2378	+	2.78364	2.47456	1.00704	+	1.22662	1.14144	0.458092	+	4.70228	6.31262	2.62434	+	1.36386	1.09773	0.451771
76	Q6UUV9;M0QXN6;M0QX46	CREB-regulated transcription coactivator 1	CRTC1	3006	+	3.50755	2.30783	0.998408	+	1.33957	1.20651	0.486453	+	1.2654	1.42474	0.554554	NA	NA	NA	NA
77	J3KN16;Q5VYK3	Proteasome-associated protein ECM29 homolog	KIAA0368;ECM29	1162	+	2.1294	2.66198	0.996381	+	1.18386	1.41064	0.536959	+	1.67613	2.1641	0.815887	+	2.20163	2.10657	0.838423
78	P63173;J3KT73;J3QL01	60S ribosomal protein L38	RPL38	2348	+	2.54785	2.49346	0.992063	+	2.45179	2.26322	0.909813	+	2.18365	2.52787	0.985547	+	1.19985	1.33784	0.516996
79	P42566;B1AUU8	Epidermal growth factor receptor substrate 15	EPS15	2043	+	2.65726	2.45245	0.988886	+	2.98244	2.53495	1.04374	+	3.56868	3.47383	1.45821	+	1.32601	1.15793	0.46972
80	F8VSA6;E9PS38;S4R3E9;E9PL57;Q15843	NEDD8	NEDD8;NEDD8-MDP1	777	+	1.73503	2.83773	0.983787	+	1.7521	2.21268	0.824698	+	1.00119	2.46489	0.765034	NA	NA	NA	NA
81	Q9Y2K1	Zinc finger and BTB domain-containing protein 1	ZBTB1	4303	+	3.16219	2.31598	0.98046	+	0.813362	1.17444	0.431875	+	3.06495	3.24224	1.31963	+	3.69052	1.90003	0.849136
82	O75150	E3 ubiquitin-protein ligase BRE1B	RNF40	1472	+	4.90498	2.11857	0.979788	+	3.85667	1.147	0.537507	+	4.78771	2.55359	1.18355	+	3.57033	1.23196	0.569834
83	Q9H6R7	WD repeat and coiled-coil-containing protein C2orf44	C2orf44	3893	+	2.47612	2.4404	0.968526	NA	NA	NA	NA	+	2.05174	2.57662	0.983331	+	1.76119	1.48317	0.604023
84	E7EX90;Q14203;Q6AWB1	Dynactin subunit 1	DCTN1;DKFZp686E0752	721	+	3.74156	2.18647	0.96418	+	2.933	1.40504	0.62645	NA	NA	NA	NA	+	2.40195	1.09594	0.48887
85	Q14145	Kelch-like ECH-associated protein 1	KEAP1	2591	+	4.0846	2.12851	0.956021	+	4.74995	2.82054	1.26497	+	3.70198	2.77458	1.21358	+	3.0863	1.91197	0.82806
86	P21333;Q5HY54	Filamin-A	FLNA	1839	+	4.73223	2.05704	0.948501	+	5.64379	3.08811	1.41854	+	3.42121	1.77029	0.801298	+	3.94032	1.75785	0.799631
88	Q86T24	Transcriptional regulator Kaiso	ZBTB33	3090	+	4.37747	2.07854	0.946322	+	4.76785	2.15885	0.992764	+	4.63979	3.04441	1.38298	+	5.14511	2.3051	1.06688
89	O75592	E3 ubiquitin-protein ligase MYCBP2	MYCBP2	1508	+	1.80872	2.61491	0.93995	+	1.94078	2.34645	0.884439	+	1.55725	2.52768	0.895457	+	2.35966	2.69953	1.03518
90	Q06609;E9PNT5	DNA repair protein RAD51 homolog 1	RAD51	2453	+	2.62525	2.28832	0.932282	+	2.19581	2.09337	0.833743	+	2.09792	3.00425	1.11083	+	3.28218	2.42313	1.02682
91	Q9UPN4;I3L2J8;I3L2X7	Centrosomal protein of 131 kDa	CEP131	4266	+	2.70985	2.26815	0.932096	+	2.23125	1.73433	0.717913	+	2.49717	2.50095	1.01189	+	4.57472	3.54337	1.53429
93	P25054;E9PFT7;B7Z2B6	Adenomatous polyposis coli protein	APC	1876	+	3.03312	2.1807	0.923757	+	2.18453	2.01176	0.806744	+	2.86569	3.2118	1.28452	+	1.67158	1.57151	0.626584
95	O60343	TBC1 domain family member 4	TBC1D4	1435	+	1.96569	2.45423	0.917794	+	1.24389	1.24017	0.490641	+	1.62539	2.21513	0.823538	NA	NA	NA	NA
96	Q9Y4H2	Insulin receptor substrate 2	IRS2	4348	+	1.66048	2.61594	0.917481	+	4.67606	3.04472	1.34998	+	1.17912	2.08236	0.72077	NA	NA	NA	NA
99	Q15025;A0A0A0MRZ4;E7EMV7	TNFAIP3-interacting protein 1	TNIP1	2657	+	2.31863	2.30575	0.91152	+	2.50732	3.50204	1.2805	+	1.96151	2.27674	0.883345	+	2.02597	2.4965	0.937019
100	P49454	Centromere protein F	CENPF	2112	+	2.27021	2.31844	0.910892	+	1.42578	1.39868	0.553761	+	3.45923	3.95548	1.60856	+	1.71064	1.28097	0.532654
101	P46108	Adapter molecule crk	CRK	2069	+	4.43724	1.98749	0.910279	+	5.93578	2.30151	1.0868	+	4.0295	2.31748	1.05128	+	5.39051	2.27018	1.05903
103	E7ETA6;Q15154;A6NNN6	Pericentriolar material 1 protein	PCM1	696	+	3.48245	2.06703	0.905813	+	2.88887	1.67142	0.728405	+	3.44876	3.14303	1.32808	+	2.77639	2.23203	0.924695
104	Q9UQL6	Histone deacetylase 5	HDAC5	4281	+	3.61094	2.0511	0.905512	+	3.68574	2.60808	1.12089	+	2.76653	2.03357	0.871556	+	3.63097	2.29712	1.00116
105	O95613	Pericentrin	PCNT	1586	+	2.47733	2.23277	0.902049	+	1.22846	1.66563	0.613132	+	2.82603	4.15057	1.56047	NA	NA	NA	NA
106	Q96BU1;E9PSA0	S100P-binding protein	S100PBP	3479	+	1.49884	2.65603	0.899422	+	2.09801	3.21803	1.13911	+	1.29715	2.73421	0.891578	+	1.57634	2.60545	0.901122
107	E9PCH4;Q8TEU7;A0A0A6YYB7;A0A0A0MR23;D6RE77;B7Z7Y1	Rap guanine nucleotide exchange factor 6	RAPGEF6	731	+	1.73656	2.4916	0.897573	+	3.65134	2.07969	0.918453	+	1.46667	2.08935	0.767383	+	1.50332	1.07238	0.449876
108	Q68DQ2	Very large A-kinase anchor protein	CRYBG3	2925	+	4.15516	1.95868	0.889311	+	3.79656	2.32303	1.01975	+	3.26405	2.34344	1.01923	NA	NA	NA	NA
109	Q14008	Cytoskeleton-associated protein 5	CKAP5	2581	+	6.00286	1.8595	0.888586	+	3.15921	1.27256	0.578634	+	3.63934	1.18428	0.557061	+	2.59494	1.06718	0.481804
110	P50851	Lipopolysaccharide-responsive and beige-like anchor protein	LRBA	2146	+	3.92233	1.97614	0.888312	+	4.35326	2.078	0.945275	+	3.5638	2.13203	0.953859	+	3.01742	1.41487	0.632871
111	Q9C0B7	Transport and Golgi organization protein 6 homolog	TANGO6	3804	+	4.69564	1.91468	0.886694	+	4.37608	2.52679	1.12857	+	2.71882	1.56474	0.691505	+	4.33172	2.25131	1.01561
112	Q86YA3;G3XAL8	Protein ZGRF1	ZGRF1	3137	+	2.08768	2.28357	0.882176	+	2.89654	1.96319	0.837223	+	2.43586	3.19147	1.21733	+	2.85218	1.66368	0.723934
113	Q9NR09	Baculoviral IAP repeat-containing protein 6	BIRC6	3993	+	2.70972	2.10426	0.87601	+	3.08438	1.94715	0.841129	+	2.32246	2.18105	0.889633	+	2.91966	1.53214	0.676023
116	Q9HCK1;N0DVX5	DBF4-type zinc finger-containing protein 2	ZDBF2	3954	+	4.49732	1.88439	0.868491	+	4.53999	1.88297	0.869036	+	4.58883	3.03506	1.37609	+	4.63147	2.14482	0.982455
117	Q9NRA8;B1AKL4;B0QYZ7	Eukaryotic translation initiation factor 4E transporter	EIF4ENIF1	4000	+	2.89349	2.04589	0.866942	+	2.0933	1.9494	0.779449	+	2.51626	2.75157	1.09467	+	1.82836	1.27557	0.536558
118	A6NHB5;Q14202;A6NHN7	Zinc finger MYM-type protein 3	ZMYM3	361	+	3.49159	1.95674	0.863561	+	5.91164	2.65099	1.2406	+	2.60108	1.09346	0.498112	+	5.80857	3.68875	1.67806
119	Q92667	A-kinase anchor protein 1, mitochondrial	AKAP1	3414	+	1.6855	2.38504	0.862628	+	2.18285	3.07099	1.115	+	1.98372	3.02872	1.09806	+	1.85333	2.06699	0.794049
120	D3YTB5;P51617;H7C224	Interleukin-1 receptor-associated kinase 1	IRAK1	602	+	4.45495	1.85679	0.855622	+	5.59223	2.00543	0.947183	+	3.71437	2.05486	0.929479	+	4.21839	1.32332	0.620306
122	Q9UJX2	Cell division cycle protein 23 homolog	CDC23	4209	+	2.08989	2.16903	0.847803	+	1.61071	1.27292	0.524576	NA	NA	NA	NA	+	2.84241	1.80984	0.778185
123	Q15276	Rab GTPase-binding effector protein 1	RABEP1	2678	+	2.89148	1.99181	0.847328	+	4.23718	2.11239	0.955298	+	2.61035	2.54733	1.03863	+	1.70795	1.72719	0.678193
124	G3V5R9;G3V3H3;G5E9S8;G3V2E7;F8W6L3;E7EVH7;Q07866	Kinesin light chain 1	KLC1	970	+	3.50062	1.9049	0.84367	+	4.46281	2.31524	1.04693	+	2.43879	1.57487	0.682854	+	1.9616	1.44442	0.60245
125	Q3V6T2;H0Y470;H7C2C6	Girdin	CCDC88A	2779	+	3.33397	1.91994	0.842492	NA	NA	NA	NA	+	1.45151	2.10913	0.770555	+	1.20741	1.40869	0.538611
126	Q9NPI6	mRNA-decapping enzyme 1A	DCP1A	3977	+	3.52214	1.89363	0.840107	+	2.60476	1.56859	0.677712	+	3.15778	2.3331	1.00827	+	2.33067	1.45775	0.624879
127	Q99460;A0A087WW66	26S proteasome non-ATPase regulatory subunit 1	PSMD1	3641	+	3.46065	1.89365	0.837641	NA	NA	NA	NA	+	2.10414	1.3679	0.589702	+	2.7537	1.47715	0.648817
129	Q96QT6;C9J9G2	PHD finger protein 12	PHF12	3603	+	2.77887	1.96779	0.832256	+	5.24823	4.83501	2.08093	+	2.70816	2.17747	0.919646	+	4.18292	3.13744	1.35194
130	E7ER32;A0A087X287;W0Z7M9;Q969V6;B0QY83;A0A087WU73	MKL/myocardin-like protein 1	MKL1;mkl1	163	+	2.56523	2.00282	0.831372	+	2.84639	1.34907	0.60163	+	2.45054	3.10936	1.19545	+	2.0178	1.70438	0.694119
131	Q96JM7	Lethal(3)malignant brain tumor-like protein 3	L3MBTL3	3564	+	2.56986	1.98655	0.826057	NA	NA	NA	NA	+	4.66276	6.56954	2.70374	+	2.68357	1.78758	0.762071
132	Q9UBF2	Coatomer subunit gamma-2	COPG2	4155	+	4.76857	1.76739	0.82477	+	4.93697	1.71602	0.805724	NA	NA	NA	NA	+	2.93628	1.22503	0.553951
134	Q92610;H0YM74	Zinc finger protein 592	ZNF592	3404	+	2.62528	1.93334	0.810958	+	3.02166	2.27034	0.954968	+	3.57192	3.67944	1.53039	+	4.96843	4.19215	1.81232
135	Q9UMN6	Histone-lysine N-methyltransferase 2B	KMT2B	4252	+	2.97089	1.87868	0.810004	+	3.52981	2.30598	0.99897	+	2.84219	2.39492	1.00728	+	3.6182	2.4135	1.04434
137	O43379	WD repeat-containing protein 62	WDR62	1391	+	3.23522	1.83667	0.806159	NA	NA	NA	NA	+	2.63169	3.35725	1.2963	+	2.44628	1.31368	0.575229
139	O14641;I3L2W9;I3L2N2;I3L0M7	Segment polarity protein dishevelled homolog DVL-2	DVL2	1315	+	4.22731	1.74658	0.802894	+	3.77173	2.13351	0.944876	+	3.85035	2.20329	0.996191	+	2.89996	1.52764	0.673574
140	Q9H7D7;H0Y9R3	WD repeat-containing protein 26	WDR26	3902	+	3.28035	1.80792	0.796901	NA	NA	NA	NA	+	1.85612	1.16825	0.504572	+	1.90383	1.07961	0.468079
141	A0A087WXC5;E7ESZ7;O95299	NADH dehydrogenase [ubiquinone] 1 alpha subcomplex subunit 10, mitochondrial	NDUFA10	90	+	1.54542	2.19964	0.795004	+	1.8337	2.56726	0.931119	+	1.57342	3.26483	1.06991	+	1.87996	2.30324	0.865118
142	Q5W0B1	RING finger protein 219	RNF219	2913	+	5.83043	1.65287	0.791579	+	5.70266	1.43229	0.688529	+	5.00766	2.48598	1.16254	+	5.2821	1.47495	0.703236
143	P46939	Utrophin	UTRN	2080	+	2.7268	1.86217	0.791375	+	3.77962	3.30067	1.37653	+	2.63397	2.41111	0.995036	+	2.29945	1.85547	0.763521
144	Q96PY6	Serine/threonine-protein kinase Nek1	NEK1	3598	+	2.41974	1.9118	0.79059	+	3.6106	2.22608	0.973027	+	1.23832	1.36612	0.534253	+	1.75099	1.65763	0.659884
145	J3KNZ9;Q9HAH7	Probable fibrosin-1	FBRS	1173	+	4.43619	1.6982	0.787387	+	2.89248	0.908939	0.420812	+	4.23854	2.49733	1.1354	+	2.43269	1.44161	0.623156
146	Q9BY89	Uncharacterized protein KIAA1671	KIAA1671	3777	+	3.84872	1.73202	0.786249	+	2.91405	1.14977	0.522523	+	2.0788	2.28355	0.898565	NA	NA	NA	NA
148	P78312;E7EUR8	Protein FAM193A	FAM193A	2363	+	3.15156	1.78646	0.783319	NA	NA	NA	NA	+	3.16024	3.12803	1.29235	+	1.68338	1.46723	0.593754
149	J3KNL6;O15027;F1T0I1	Protein transport protein Sec16A	SEC16A	1167	+	4.57215	1.68029	0.78266	NA	NA	NA	NA	+	4.52127	2.57584	1.18153	+	2.892	1.40715	0.62604
150	Q14C86;C9IZ08;B4DGD8;H0Y7I9	GTPase-activating protein and VPS9 domain-containing protein 1	GAPVD1	2646	+	4.259	1.69132	0.780256	+	3.15247	1.58599	0.705184	+	2.90063	1.7513	0.772159	NA	NA	NA	NA
153	A6NKD9	Coiled-coil domain-containing protein 85C	CCDC85C	368	+	3.12193	1.75633	0.770505	+	2.6338	1.32655	0.58633	+	2.62656	1.51078	0.666668	+	2.49306	1.26215	0.556835
155	P49792	E3 SUMO-protein ligase RanBP2	RANBP2	2126	+	4.88404	1.63508	0.768986	+	4.42886	1.5244	0.711963	+	4.69958	2.92927	1.33857	+	3.75267	1.38054	0.636707
157	P0DMV9;P0DMV8;V9GZ37	Heat shock 70 kDa protein 1B;Heat shock 70 kDa protein 1A	HSPA1B;HSPA1A	1716	+	5.73178	1.59708	0.764728	+	4.27448	1.14466	0.541786	NA	NA	NA	NA	+	3.93059	1.26803	0.591534
158	E7ESP9;P07197;E7EMV2	Neurofilament medium polypeptide	NEFM	693	+	2.7577	1.7808	0.763324	+	2.38439	2.96983	1.11617	+	1.06711	2.14462	0.713982	+	1.31131	1.66945	0.623524
160	P49257	Protein ERGIC-53	LMAN1	2105	+	1.3739	2.15316	0.75883	+	1.85184	2.33247	0.869964	+	1.25725	2.45306	0.821521	+	1.47366	1.64821	0.633714
163	Q96N67;A0A0C4DGY6	Dedicator of cytokinesis protein 7	DOCK7	3588	+	4.64099	1.61158	0.754109	+	4.02014	1.2951	0.604782	+	3.57634	1.47283	0.6814	+	3.1427	1.32852	0.601278
166	P32121;I3L412;Q68DZ5;K7ENA6	Beta-arrestin-2	ARRB2;DKFZp686L0365	1953	+	2.50655	1.77093	0.74667	+	2.62621	1.94882	0.816455	+	2.30836	1.75934	0.743244	+	2.93616	2.18498	0.919156
167	Q6ZTW0	Tubulin polyglutamylase complex subunit 1	TPGS1	3023	+	1.84118	1.88366	0.737742	+	5.7858	2.69404	1.25534	+	2.11469	2.11422	0.848707	+	1.97708	1.76256	0.710371
169	O60566	Mitotic checkpoint serine/threonine-protein kinase BUB1 beta	BUB1B	1443	+	2.61172	1.71107	0.730598	+	1.90956	1.77146	0.708209	+	1.80627	2.35207	0.886162	+	0.770779	1.4597	0.497336
170	Q9UHF7;E5RFF3;E5RJ97;H0YC29	Zinc finger transcription factor Trps1	TRPS1	4189	+	2.74148	1.6934	0.730247	+	3.74581	2.64728	1.13933	+	2.99898	2.59107	1.08987	+	3.36413	2.39738	1.02286
171	A0A0C4DGG3;Q8NHM5	Lysine-specific demethylase 2B	KDM2B	296	+	2.9294	1.65866	0.725206	+	1.81985	1.47278	0.604164	+	3.35862	2.40133	1.04738	+	2.3544	2.29921	0.912755
173	Q8IX90	Spindle and kinetochore-associated protein 3	SKA3	3172	+	4.92491	1.52679	0.721539	+	2.56666	1.15594	0.516983	+	4.28878	2.01966	0.936084	NA	NA	NA	NA
174	Q9NSV4	Protein diaphanous homolog 3	DIAPH3	4021	+	3.21764	1.61655	0.719492	+	3.21717	2.32642	0.987761	+	2.5276	1.82583	0.780676	NA	NA	NA	NA
175	P15924	Desmoplakin	DSP	1785	+	2.69667	1.66903	0.71915	+	2.58532	1.47876	0.64316	+	2.60994	2.01768	0.855473	+	2.36025	1.35064	0.586214
177	P35579	Myosin-9	MYH9	1982	+	3.79214	1.57238	0.718464	+	3.54027	1.61406	0.728732	NA	NA	NA	NA	+	1.85757	1.0055	0.438567
178	O95817	BAG family molecular chaperone regulator 3	BAG3	1603	+	3.38405	1.59451	0.716076	+	2.93603	1.72771	0.751754	NA	NA	NA	NA	+	2.28591	1.48923	0.634378
180	R4GNB2;R4GN35;Q5VZ89	DENN domain-containing protein 4C	DENND4C	4401	+	2.73939	1.64119	0.710655	+	2.7234	2.0319	0.851643	+	1.84428	1.46439	0.610653	+	1.56511	1.17747	0.489475
181	Q12923	Tyrosine-protein phosphatase non-receptor type 13	PTPN13	2498	+	2.50994	1.66932	0.710387	+	2.33387	1.84185	0.761128	+	2.37474	2.32513	0.942098	+	2.01613	1.33081	0.564874
182	Q3KQU3	MAP7 domain-containing protein 1	MAP7D1	2773	+	1.80397	1.80469	0.7102	+	2.2588	2.36862	0.925176	+	1.85471	1.7271	0.700209	+	1.91487	1.66182	0.673084
184	Q9Y3P9	Rab GTPase-activating protein 1	RABGAP1	4332	+	1.74078	1.81488	0.707876	+	1.40935	1.76828	0.661811	+	1.39168	2.27517	0.804224	+	1.55001	1.62603	0.633864
185	Q70CQ2	Ubiquitin carboxyl-terminal hydrolase 34	USP34	3029	+	3.33833	1.57404	0.706413	NA	NA	NA	NA	+	3.10117	1.78847	0.795748	+	4.92106	3.62163	1.59148
187	Q63HK5	Teashirt homolog 3	TSHZ3	2916	+	3.80676	1.53341	0.702512	+	5.79055	2.96033	1.37039	+	3.41023	1.93126	0.866216	+	4.65243	2.49952	1.13017
189	Q8TD26	Chromodomain-helicase-DNA-binding protein 6	CHD6	3325	+	2.49939	1.64685	0.701718	NA	NA	NA	NA	+	2.58885	2.31592	0.958533	+	1.78709	1.32372	0.551402
190	Q8NDI1	EH domain-binding protein 1	EHBP1	3270	+	1.81573	1.76503	0.698809	+	2.25561	2.37095	0.925568	+	1.13819	1.51796	0.568589	+	1.29328	1.60125	0.602442
191	Q96A65	Exocyst complex component 4	EXOC4	3463	+	1.70772	1.78287	0.695222	+	2.15388	1.42898	0.606501	+	2.32175	1.59183	0.683263	+	1.81727	1.01862	0.44227
192	Q09666	Neuroblast differentiation-associated protein AHNAK	AHNAK	2473	+	2.38497	1.64435	0.69507	+	3.5168	2.24875	0.976718	+	2.02793	1.50332	0.635149	+	2.01808	1.24874	0.535101
193	Q8NFU7	Methylcytosine dioxygenase TET1	TET1	3292	+	1.65596	1.79272	0.693538	+	1.95865	2.69412	0.982285	+	2.33696	3.80041	1.36667	+	1.48813	1.7255	0.657752
196	O14640;A0A087WWA7;P54792	Segment polarity protein dishevelled homolog DVL-1;Putative segment polarity protein dishevelled homolog DVL1P1	DVL1;DVL1P1	1314	+	2.66766	1.58532	0.686636	+	3.89722	2.60747	1.13397	+	2.31372	1.66365	0.709103	+	3.3052	2.21549	0.952578
198	Q9UPN7	Serine/threonine-protein phosphatase 6 regulatory subunit 1	PPP6R1	4267	+	2.53216	1.5971	0.685078	+	1.83337	1.16968	0.498788	+	2.56322	2.49694	1.01721	+	2.38606	1.42163	0.613821
199	Q9Y5K6	CD2-associated protein	CD2AP	4364	+	4.95651	1.44397	0.684875	+	4.42157	1.95763	0.897268	NA	NA	NA	NA	+	2.3168	1.04126	0.464983
201	B2RB02		EPB41L3	422	+	1.51811	1.78958	0.679292	+	2.4249	2.67772	1.03615	NA	NA	NA	NA	+	0.875333	1.16744	0.436834
202	Q9ULX6	A-kinase anchor protein 8-like	AKAP8L	4251	+	4.21832	1.45768	0.678974	NA	NA	NA	NA	+	2.79662	1.23439	0.561289	+	3.46217	1.64793	0.740071
203	Q6ZRI6	Uncharacterized protein C15orf39	C15orf39	3020	+	3.22336	1.51333	0.678478	+	3.1829	1.56251	0.696881	+	3.97855	3.09613	1.35805	+	1.33417	1.16675	0.473116
205	Q8WVX9;E9PNW8	Fatty acyl-CoA reductase 1	FAR1	3368	+	2.55313	1.56646	0.67469	+	1.74151	2.01362	0.767	+	2.37239	2.12093	0.873721	+	0.891298	1.29283	0.472958
206	Q9P2R3	Rabankyrin-5	ANKFY1	4142	+	1.40191	1.81534	0.674064	+	2.20715	1.65928	0.690618	+	2.42661	1.15275	0.517933	+	1.49004	1.02868	0.433829
208	O75461	Transcription factor E2F6	E2F6	1498	+	2.19847	1.60258	0.670387	+	4.31699	3.03471	1.32297	+	2.18031	1.79072	0.74584	+	2.45111	1.5818	0.675729
209	Q6SPF0;E9PIW9	Atherin	SAMD1	2999	+	2.96306	1.51364	0.670291	NA	NA	NA	NA	+	4.27705	5.91926	2.40196	+	2.12647	2.08815	0.826124
212	X6RLT1;H0UI80;Q8IXH7	Negative elongation factor C/D	NELFCD;TH1L	987	+	3.37981	1.47365	0.666831	NA	NA	NA	NA	+	2.37678	1.68265	0.719592	+	1.50983	1.03979	0.43863
213	Q9UPQ9;H0Y720	Trinucleotide repeat-containing gene 6B protein	TNRC6B	4269	+	3.94538	1.43897	0.66557	+	3.35273	1.87793	0.82706	+	3.13993	1.85509	0.823805	+	2.24398	1.08585	0.480742
214	Q92878	DNA repair protein RAD50	RAD50	3425	+	2.10002	1.60161	0.664512	+	2.59939	1.8247	0.770954	+	1.81254	1.56234	0.642168	+	2.7279	1.85672	0.789466
217	P28288	ATP-binding cassette sub-family D member 3	ABCD3	1909	+	2.31609	1.56327	0.662547	+	2.29215	1.51399	0.643638	+	1.84284	1.62326	0.664824	NA	NA	NA	NA
218	Q7Z6Z7	E3 ubiquitin-protein ligase HUWE1	HUWE1	3086	+	5.19088	1.3851	0.661216	NA	NA	NA	NA	+	3.5827	1.19416	0.560502	+	3.95474	1.0474	0.494645
219	Q92997	Segment polarity protein dishevelled homolog DVL-3	DVL3	3441	+	1.63867	1.68957	0.660795	+	2.43284	2.78343	1.06847	+	1.11923	2.11117	0.716634	+	1.42986	1.90807	0.702688
220	H0YEL0;O14893;G5EA29;H0YDP6	Gem-associated protein 2	GEMIN2	1029	+	2.04557	1.59718	0.659802	+	1.71068	1.35225	0.557079	+	1.80324	1.16969	0.502889	NA	NA	NA	NA
221	E7EQ57;E7EUL6		MECOM	676	+	1.35912	1.77579	0.658297	+	1.91133	1.74946	0.70129	+	2.76858	2.62195	1.07933	+	1.95872	2.22076	0.850153
222	P51587	Breast cancer type 2 susceptibility protein	BRCA2	2164	+	3.84445	1.42657	0.658194	+	4.00675	1.57222	0.723649	+	3.81882	2.08977	0.948232	+	3.89313	1.85487	0.838035
223	Q9NZC7	WW domain-containing oxidoreductase	WWOX	4105	+	2.96305	1.48234	0.657986	+	4.6224	2.39943	1.08788	+	3.51836	2.17969	0.970572	+	3.23871	1.41466	0.638954
224	Q8N3C0	Activating signal cointegrator 1 complex subunit 3	ASCC3	3215	+	3.15993	1.46462	0.657007	+	3.15477	1.1762	0.538428	+	2.48545	1.53114	0.668475	+	3.56053	1.43104	0.653767
225	A0A087X0W4		ACACA	145	+	1.02169	1.9569	0.654761	+	4.84791	5.34387	2.20943	+	3.9461	4.53525	1.87694	+	1.0411	3.1677	0.886114
226	P10398;Q96II5	Serine/threonine-protein kinase A-Raf	ARAF	1719	+	2.0149	1.57898	0.651773	+	1.82751	1.95764	0.758964	+	2.43337	1.33133	0.589163	+	1.5328	1.14599	0.476975
227	P55039;A8MZF9	Developmentally-regulated GTP-binding protein 2	DRG2	2217	+	1.68279	1.63509	0.647515	+	2.98619	1.17571	0.534775	+	1.66801	1.22493	0.516587	NA	NA	NA	NA
228	Q9H1A4;H0Y564	Anaphase-promoting complex subunit 1	ANAPC1	3839	+	3.08175	1.4446	0.646669	NA	NA	NA	NA	+	2.69665	1.17391	0.533732	+	2.50816	1.02659	0.4634
229	Q9Y2H2	Phosphatidylinositide phosphatase SAC2	INPP5F	4299	+	1.4215	1.70815	0.64607	+	1.48745	1.69863	0.649849	+	0.706689	1.54203	0.508065	NA	NA	NA	NA
230	P04049;H7C155	RAF proto-oncogene serine/threonine-protein kinase	RAF1	1642	+	3.51031	1.41516	0.645956	+	3.2794	1.1612	0.534464	+	1.85955	1.2962	0.551776	NA	NA	NA	NA
231	Q96EA4	Protein Spindly	SPDL1	3505	+	4.4744	1.37106	0.645314	+	3.72409	1.5034	0.687927	NA	NA	NA	NA	+	4.84746	1.69216	0.793475
233	Q86V48	Leucine zipper protein 1	LUZP1	3111	+	3.16454	1.42547	0.641333	+	2.55751	1.70732	0.726534	+	4.03297	3.19256	1.39953	+	1.52499	1.05836	0.445882
235	Q9H2M9	Rab3 GTPase-activating protein non-catalytic subunit	RAB3GAP2	3851	+	1.74369	1.59896	0.640626	+	0.617846	1.30201	0.433858	NA	NA	NA	NA	+	2.29999	1.13719	0.50239
236	Q8NG31;E9PPJ1;H0YCZ2	Protein CASC5	CASC5	3295	+	5.07357	1.34154	0.640006	+	5.94191	1.58552	0.761943	+	6.18363	2.7079	1.2973	+	5.172	1.58824	0.752901
238	Q86YC2	Partner and localizer of BRCA2	PALB2	3138	+	3.21726	1.41363	0.637962	+	1.90831	1.08974	0.472034	NA	NA	NA	NA	+	2.69611	1.1878	0.533031
239	Q9C0C2	182 kDa tankyrase-1-binding protein	TNKS1BP1	3805	+	4.35673	1.35766	0.637584	+	4.15044	1.64758	0.759028	+	2.46987	1.21989	0.54621	+	3.41661	1.64179	0.736141
241	C9K0J5;Q70E73;C9J164	Ras-associated and pleckstrin homology domains-containing protein 1	RAPH1	577	+	1.99305	1.5382	0.636564	+	1.77587	1.89347	0.734841	NA	NA	NA	NA	+	1.32448	1.18898	0.47979
242	A0MZ66	Shootin-1	KIAA1598	337	+	4.06242	1.36207	0.63464	+	4.64382	1.61097	0.753895	NA	NA	NA	NA	+	2.50938	1.08549	0.4873
243	Q8IZH2	5-3 exoribonuclease 1	XRN1	3196	+	3.36133	1.39181	0.632689	+	3.55849	1.63308	0.737024	+	2.60344	1.32626	0.593012	+	3.01871	1.35491	0.608805
245	A0A0A0MQS1;Q53H96;B5MD87	Pyrroline-5-carboxylate reductase;Pyrroline-5-carboxylate reductase 3	PYCRL	179	+	2.69557	1.43771	0.631543	+	2.38512	1.19156	0.526073	+	2.47815	1.66801	0.719683	+	2.43907	1.25475	0.552277
246	A0JP02;B4DJX4;Q9HAU0	Pleckstrin homology domain-containing family A member 5	PLEKHA5	336	+	1.42379	1.64862	0.629113	+	1.92868	1.90059	0.750514	+	2.66087	2.19574	0.922583	+	1.00576	1.35642	0.503381
248	O15084	Serine/threonine-protein phosphatase 6 regulatory ankyrin repeat subunit A	ANKRD28	1348	+	1.70633	1.56045	0.625574	+	1.28808	1.20209	0.481663	+	1.36117	1.59619	0.61525	NA	NA	NA	NA
249	B9EGE7;Q8TCN5	Zinc finger protein 507	ZNF507	502	+	3.44378	1.36658	0.624156	+	3.18339	1.30474	0.592484	+	4.75261	3.06585	1.39846	NA	NA	NA	NA
250	Q14207	Protein NPAT	NPAT	2605	+	2.70437	1.41518	0.62313	+	3.30633	1.84307	0.811608	+	3.68451	3.1169	1.34099	+	3.80771	2.29038	1.00771
254	O15294	UDP-N-acetylglucosamine--peptide N-acetylglucosaminyltransferase 110 kDa subunit	OGT	1362	+	3.80296	1.33924	0.620056	+	3.14775	1.51728	0.677739	+	3.71895	1.92532	0.876322	+	3.02247	1.64957	0.725369
255	Q5VUA4	Zinc finger protein 318	ZNF318	2898	+	4.58391	1.29521	0.613061	+	5.36522	1.59517	0.758904	+	3.52195	1.35188	0.628146	+	4.98145	1.7291	0.812358
256	Q8NDV7;H7C269;H3BTQ1	Trinucleotide repeat-containing gene 6A protein	TNRC6A	3273	+	2.3551	1.41969	0.611844	+	3.07053	1.68638	0.741461	+	2.02022	2.11818	0.840803	NA	NA	NA	NA
257	Q5T5U3;A0A087WW76;E7ESW5;F8W9U9	Rho GTPase-activating protein 21	ARHGAP21	2865	+	2.95071	1.36578	0.611298	+	4.18998	1.88546	0.860087	+	3.55771	1.71135	0.781682	+	2.69949	1.198	0.537223
259	B4DLN1			439	+	3.87623	1.30779	0.607859	+	3.10476	1.37082	0.617556	+	3.95188	1.88588	0.868014	+	3.59531	1.09788	0.512347
260	P57740	Nuclear pore complex protein Nup107	NUP107	2248	+	3.35293	1.32929	0.606556	+	2.27667	0.946499	0.425988	+	3.23142	1.36804	0.62826	+	3.10475	1.03415	0.477493
261	A0A0D9SGJ6;J3KQV8;O43426;J3KPK1;C9JFZ1;C9JW66	Synaptojanin-1	SYNJ1	333	+	2.75475	1.36736	0.606102	+	2.10551	1.23114	0.531942	+	1.02658	1.30588	0.495971	+	0.86485	1.18386	0.440277
264	Q8IWJ2;B8ZZW2	GRIP and coiled-coil domain-containing protein 2	GCC2	3159	+	2.00494	1.43584	0.601706	+	3.21234	1.82166	0.799413	+	3.72271	3.64457	1.53629	+	1.34961	1.08016	0.445057
265	Q9H6T3	RNA polymerase II-associated protein 3	RPAP3	3896	+	3.28457	1.31694	0.59987	+	2.61013	1.12391	0.50517	+	2.15457	1.42744	0.614155	NA	NA	NA	NA
266	E9PL17;Q92989	Polyribonucleotide 5-hydroxyl-kinase Clp1	CLP1	775	+	3.96017	1.28601	0.599843	+	2.51911	1.30722	0.575157	NA	NA	NA	NA	+	3.71559	1.40643	0.646913
267	P49327	Fatty acid synthase;[Acyl-carrier-protein] S-acetyltransferase;[Acyl-carrier-protein] S-malonyltransferase;3-oxoacyl-[acyl-carrier-protein] synthase;3-oxoacyl-[acyl-carrier-protein] reductase;3-hydroxyacyl-[acyl-carrier-protein] dehydratase;Enoyl-[acyl-carrier-protein] reductase;Oleoyl-[acyl-carrier-protein] hydrolase	FASN	2107	+	4.43444	1.2685	0.599149	+	4.26971	1.90232	0.869533	NA	NA	NA	NA	+	2.68491	1.06792	0.484011
268	Q8TBA6	Golgin subfamily A member 5	GOLGA5	3312	+	2.08747	1.4143	0.598125	+	1.97875	1.66096	0.677101	+	2.60166	1.67716	0.729412	NA	NA	NA	NA
272	Q8TD16	Protein bicaudal D homolog 2	BICD2	3323	+	1.13246	1.60948	0.586568	+	1.43491	2.21571	0.783484	+	3.28219	5.6836	2.09013	NA	NA	NA	NA
273	B5MCT7;P49593	Protein phosphatase 1F	PPM1F	463	+	1.59826	1.45639	0.584494	+	1.86982	1.76736	0.703835	+	1.15601	2.15616	0.733965	NA	NA	NA	NA
274	Q6NZY4	Zinc finger CCHC domain-containing protein 8	ZCCHC8	2966	+	4.41433	1.23568	0.584227	+	2.64455	1.11259	0.501381	+	4.19034	1.70772	0.79816	+	4.17014	1.49105	0.692481
279	Q9H0L4	Cleavage stimulation factor subunit 2 tau variant	CSTF2T	3829	+	3.29728	1.27099	0.581016	+	3.09319	1.15434	0.528064	NA	NA	NA	NA	+	2.21659	1.01225	0.450999
280	Q8TE76	MORC family CW-type zinc finger protein 4	MORC4	3332	+	1.70849	1.42348	0.580898	+	4.91752	1.4521	0.687978	+	1.92795	2.20974	0.859306	+	3.39343	1.39124	0.633231
282	P33993	DNA replication licensing factor MCM7	MCM7	1963	+	2.78951	1.30075	0.580761	+	2.23316	0.957494	0.429497	+	2.34496	1.25247	0.555124	NA	NA	NA	NA
283	Q9H3U1	Protein unc-45 homolog A	UNC45A	3865	+	3.51754	1.25521	0.578782	+	2.98478	1.1209	0.511974	NA	NA	NA	NA	+	2.38474	0.997802	0.449065
285	A0A024R0Y4;O75478;A0A087WWR4;A0A087WTV5	Transcriptional adapter 2-alpha	TADA2L;TADA2A	1	+	1.93768	1.37433	0.576693	+	1.89398	1.61753	0.657096	+	3.58356	3.26949	1.38703	+	3.19014	2.11608	0.909396
286	Q5T5Y3	Calmodulin-regulated spectrin-associated protein 1	CAMSAP1	2867	+	3.86555	1.23626	0.576661	+	2.88663	1.31326	0.588451	NA	NA	NA	NA	+	2.45994	1.19426	0.529303
288	Q5T5X7	BEN domain-containing protein 3	BEND3	2866	+	3.58233	1.24391	0.575159	+	5.20797	2.49351	1.14935	+	3.49566	2.34715	1.03508	+	4.0146	1.63908	0.752077
294	A0A075B6Q3;H7C4B2		BCORL1	11	+	2.4346	1.30147	0.570149	NA	NA	NA	NA	+	3.14769	2.44203	1.04796	+	2.47644	1.5357	0.659949
296	Q9UBU9;E9PIN3	Nuclear RNA export factor 1	NXF1	4163	+	3.35801	1.23996	0.569239	+	5.04421	1.34011	0.639016	NA	NA	NA	NA	+	2.94576	0.952664	0.440285
297	O60763	General vesicular transport factor p115	USO1	1450	+	2.9006	1.25724	0.566204	+	3.83518	1.56234	0.715344	+	3.53013	1.8248	0.827728	NA	NA	NA	NA
299	A0A087X0G7;A0A087WUW6;A0A087X1B1;Q9Y6K9;A0A087WV30;C9JN51	NF-kappa-B essential modulator	IKBKG	55	+	2.31989	1.29704	0.564493	+	2.67751	1.49205	0.651737	+	1.38119	1.50691	0.590207	+	1.89198	1.51575	0.622984
300	Q5T4S7	E3 ubiquitin-protein ligase UBR4	UBR4	2863	+	3.80408	1.20967	0.564125	+	2.42909	1.24581	0.5485	+	4.99485	2.02636	0.958769	+	4.66442	1.14126	0.544451
301	Q93074;Q7Z3Z5	Mediator of RNA polymerase II transcription subunit 12	MED12;TNRC11	3446	+	4.36152	1.18871	0.562552	+	2.71878	1.28803	0.573706	NA	NA	NA	NA	+	2.93367	1.56706	0.690092
302	Q9Y2F5	Little elongation complex subunit 1	ICE1	4298	+	1.45243	1.41884	0.562074	NA	NA	NA	NA	+	2.74973	3.21565	1.27023	+	1.84185	1.65348	0.665253
304	F5GWX5;A0A0C4DGG9;Q14839	Chromodomain-helicase-DNA-binding protein 4	CHD4	297	+	3.49746	1.2071	0.557907	+	4.6039	1.97627	0.910474	NA	NA	NA	NA	+	3.43069	1.43787	0.653439
305	O60315;E7EUW9	Zinc finger E-box-binding homeobox 2	ZEB2	1432	+	1.59401	1.37223	0.556806	+	1.19229	1.3573	0.522118	+	2.60856	2.80482	1.12247	+	1.87202	1.25677	0.53186
309	O75179;H0YM23	Ankyrin repeat domain-containing protein 17	ANKRD17	1477	+	2.91996	1.22875	0.555085	+	2.11981	1.04608	0.461797	NA	NA	NA	NA	+	2.31626	1.15602	0.5102
314	Q8TC07;C9JA93	TBC1 domain family member 15	TBC1D15	3317	+	2.92043	1.21419	0.549145	+	3.0898	1.38006	0.620901	+	2.03478	1.28317	0.555022	+	2.29521	1.09292	0.484902
319	I3L2C7;P57678	Gem-associated protein 4	GEMIN4	1144	+	1.31968	1.39012	0.542835	+	1.16017	1.03997	0.420938	+	1.81323	2.19507	0.841675	+	2.99667	1.16684	0.531323
322	Q9NNW5;A0A087X295;E9PDU5;E9PBK6	WD repeat-containing protein 6	WDR6	3966	+	3.1852	1.18127	0.541152	+	3.17692	0.950428	0.442539	+	4.07352	1.42786	0.672458	+	2.60246	0.95402	0.435326
324	O60907	F-box-like/WD repeat-containing protein TBL1X	TBL1X	1460	+	0.716116	1.68704	0.535817	+	1.24376	2.62786	0.842758	NA	NA	NA	NA	+	0.966239	2.396	0.732798
325	P50990	T-complex protein 1 subunit theta	CCT8	2147	+	3.92228	1.14088	0.535708	+	7.27256	4.39352	2.05888	NA	NA	NA	NA	+	3.7504	1.15938	0.541406
327	F5GZ78;P49023	Paxillin	PXN	836	+	2.89183	1.17932	0.534208	+	3.20601	1.68782	0.747162	+	2.93272	1.82662	0.80288	NA	NA	NA	NA
328	Q12873	Chromodomain-helicase-DNA-binding protein 3	CHD3	2491	+	2.37384	1.21192	0.53365	+	3.86086	2.16124	0.959735	NA	NA	NA	NA	+	3.08498	1.79615	0.784198
329	Q9Y6A5	Transforming acidic coiled-coil-containing protein 3	TACC3	4387	+	1.71918	1.27885	0.532359	+	2.3287	1.7218	0.719361	+	2.10886	1.40274	0.602831	NA	NA	NA	NA
331	O75369;E7EN95	Filamin-B	FLNB	1486	+	3.91245	1.13236	0.531819	+	4.95586	1.47808	0.700192	+	4.62407	1.67571	0.793558	NA	NA	NA	NA
333	Q4VCS5;E7ERM3;A6NP16	Angiomotin	AMOT	2791	+	2.81895	1.17606	0.53122	+	4.04985	1.84618	0.839484	+	4.15909	2.46028	1.11624	+	3.6555	1.48666	0.679262
336	O75351	Vacuolar protein sorting-associated protein 4B	VPS4B	1482	+	1.0627	1.42785	0.529341	+	1.23319	1.59975	0.59561	+	1.22441	1.50367	0.57398	+	1.21312	1.28172	0.501139
337	Q8IWZ3;E9PDP5	Ankyrin repeat and KH domain-containing protein 1	ANKHD1	3165	+	3.74742	1.13005	0.528549	NA	NA	NA	NA	+	3.45886	1.3436	0.623205	+	2.97904	1.08383	0.496356
338	Q9Y467	Sal-like protein 2	SALL2	4339	+	2.79013	1.16498	0.526034	NA	NA	NA	NA	+	3.33404	1.82385	0.819707	+	2.86968	0.949268	0.437699
339	Q99567;J3KMX1	Nuclear pore complex protein Nup88	NUP88	3648	+	4.11925	1.11276	0.525703	+	5.113	1.42959	0.680476	+	4.21353	1.89777	0.881282	NA	NA	NA	NA
340	Q8IYH5	ZZ-type zinc finger-containing protein 3	ZZZ3	3186	+	2.44282	1.18489	0.525136	+	2.78527	1.67349	0.724763	+	3.64594	2.8223	1.22752	+	3.34737	1.81806	0.803532
350	Q15058	Kinesin-like protein KIF14	KIF14	2666	+	2.31161	1.18041	0.519538	+	3.03274	0.925791	0.429971	+	3.22702	1.08725	0.507734	NA	NA	NA	NA
351	Q9ULM3	YEATS domain-containing protein 2	YEATS2	4244	+	3.30144	1.123	0.518612	+	4.38158	1.85423	0.852538	+	4.95127	3.31867	1.51558	+	4.48406	1.8604	0.857936
352	Q96JH7	Deubiquitinating protein VCIP135	VCPIP1	3561	+	4.04077	1.09629	0.517433	+	5.81402	1.58821	0.761672	NA	NA	NA	NA	+	4.0531	1.09579	0.517354
355	O14654	Insulin receptor substrate 4	IRS4	1318	+	4.38817	1.08424	0.515807	+	5.10089	1.18975	0.570804	+	5.80131	1.87785	0.90617	+	5.14098	1.34235	0.641144
357	Q8TEQ6	Gem-associated protein 5	GEMIN5	3338	+	3.33387	1.10781	0.512658	+	4.82595	2.17547	1.00163	NA	NA	NA	NA	+	2.48842	1.34326	0.588012
358	O14686	Histone-lysine N-methyltransferase 2D	KMT2D	1319	+	2.322	1.16119	0.512381	+	2.52082	1.3222	0.581006	+	1.74331	1.1945	0.509311	+	2.21615	1.3046	0.56351
362	O94818	Nucleolar protein 4	NOL4	1542	+	1.18016	1.31791	0.509342	NA	NA	NA	NA	+	4.77748	7.74772	3.12363	+	2.62088	3.14826	1.1986
363	Q92616	Translational activator GCN1	GCN1L1	3407	+	3.35345	1.09388	0.506995	+	4.26196	1.65394	0.764388	NA	NA	NA	NA	+	2.40643	1.07544	0.480807
364	E7EVZ1;Q86UP3	Zinc finger homeobox protein 4	ZFHX4	710	+	2.47635	1.13474	0.506212	+	2.16853	1.16066	0.507476	+	5.08785	3.7434	1.70095	+	4.45823	2.26813	1.02745
366	P46109	Crk-like protein	CRKL	2070	+	3.29469	1.0912	0.504909	+	4.18614	1.59046	0.735518	+	2.36588	1.17366	0.524568	+	3.7312	1.74798	0.789181
367	Q5PSV4;H0YHD0	Breast cancer metastasis-suppressor 1-like protein	BRMS1L	2838	+	1.64857	1.209	0.504555	+	3.16809	3.6725	1.42744	NA	NA	NA	NA	+	1.51672	1.36419	0.549175
369	O00411	DNA-directed RNA polymerase, mitochondrial	POLRMT	1292	+	1.77689	1.18967	0.503641	+	2.6192	1.4792	0.644632	+	2.50963	2.13268	0.888807	+	2.24876	1.04659	0.46541
372	F8W6N3;Q92560	Ubiquitin carboxyl-terminal hydrolase;Ubiquitin carboxyl-terminal hydrolase BAP1	BAP1	920	+	1.37752	1.24657	0.501902	+	1.54861	1.62218	0.632575	+	1.50323	1.99361	0.745915	+	1.44929	2.19472	0.78031
375	Q9UK61;A0A087X0F1	Protein FAM208A	FAM208A	4215	+	4.47235	1.03313	0.493379	+	4.47459	1.16821	0.554654	NA	NA	NA	NA	+	6.23465	1.42874	0.691864
377	Q8NB46	Serine/threonine-protein phosphatase 6 regulatory ankyrin repeat subunit C	ANKRD52	3255	+	2.65458	1.09122	0.492906	NA	NA	NA	NA	+	3.47435	2.13588	0.95095	+	2.50074	1.30911	0.57529
379	Q9Y6Y8	SEC23-interacting protein	SEC23IP	4400	+	2.97144	1.0748	0.492427	+	4.51423	1.25738	0.59521	+	3.37004	1.14682	0.536147	NA	NA	NA	NA
380	Q9HCK8	Chromodomain-helicase-DNA-binding protein 8	CHD8	3955	+	2.34966	1.10456	0.490941	+	2.35389	1.32582	0.576611	+	2.77721	1.78728	0.780027	+	2.98029	1.50765	0.668518
383	Q9ULJ3	Zinc finger and BTB domain-containing protein 21	ZBTB21	4241	+	3.88249	1.0345	0.488083	+	4.04761	1.04002	0.49236	NA	NA	NA	NA	+	4.57525	1.53468	0.719159
384	Q92769	Histone deacetylase 2	HDAC2	3419	+	3.0557	1.05998	0.487662	NA	NA	NA	NA	+	4.11041	2.01957	0.930062	+	6.87629	3.88399	1.81667
385	Q5T481	RNA-binding protein 20	RBM20	2862	+	2.47261	1.08444	0.486005	+	2.62194	1.16162	0.520652	+	1.96544	1.23562	0.534288	+	2.41272	1.28225	0.562038
386	P39880	Homeobox protein cut-like 1	CUX1	2014	+	3.89216	1.02144	0.482371	+	5.22823	1.69292	0.800755	NA	NA	NA	NA	+	3.59796	1.20198	0.557451
389	Q9H8E8	Cysteine-rich protein 2-binding protein	CSRP2BP	3913	+	2.46988	1.07049	0.480332	+	3.57472	1.54286	0.700512	+	4.75672	2.79518	1.28514	+	4.46432	1.71843	0.796735
390	Q9HCM1	Uncharacterized protein KIAA1551	KIAA1551	3956	+	3.26231	1.0334	0.479588	NA	NA	NA	NA	+	2.43805	1.16055	0.521407	+	2.74328	1.20619	0.541621
397	F6WR09;Q9ULJ6;E7EWM3;A0A087X127;Q8NF64	Zinc finger MIZ domain-containing protein 1;Zinc finger MIZ domain-containing protein 2	ZMIZ1;ZMIZ2	881	+	0.855991	1.32383	0.476709	+	1.73208	2.17677	0.812343	+	1.21255	1.40354	0.543214	NA	NA	NA	NA
401	P57073	Transcription factor SOX-8	SOX8	2244	+	1.4856	1.14077	0.47281	+	2.0295	1.61191	0.663849	+	3.49012	3.02431	1.28929	+	2.55337	2.09257	0.861225
403	Q13136;E9PJZ7	Liprin-alpha-1	PPFIA1	2520	+	3.51018	1.00742	0.471676	+	2.24078	1.03812	0.461855	+	3.78557	1.86609	0.854061	+	2.16253	1.01168	0.449433
409	Q6P3X3	Tetratricopeptide repeat protein 27	TTC27	2980	+	1.0652	1.19885	0.463884	+	1.47949	1.42797	0.566955	+	1.11081	1.5768	0.581537	NA	NA	NA	NA
411	P35658;A0A0A0MSW3	Nuclear pore complex protein Nup214	NUP214	1987	+	5.917	0.949192	0.463269	+	4.3027	1.28944	0.606628	+	4.43457	2.07511	0.964663	NA	NA	NA	NA
424	Q13129	Zinc finger protein Rlf	RLF	2519	+	1.31769	1.10925	0.453099	+	1.91298	1.32738	0.558905	+	2.61683	1.40301	0.623995	+	3.77845	2.01167	0.897035
426	Q9P2D1	Chromodomain-helicase-DNA-binding protein 7	CHD7	4133	+	1.67379	1.06068	0.452804	NA	NA	NA	NA	+	2.38547	1.86339	0.785271	+	2.69927	1.56007	0.678427
431	A0A0A0MT11;Q13555;Q5SWX3;A0A0A0MS52;Q8WU40	Calcium/calmodulin-dependent protein kinase type II subunit gamma	CAMK2G	237	+	2.53334	0.990194	0.449013	+	2.25407	1.11336	0.491784	+	2.4404	1.74065	0.744422	NA	NA	NA	NA
435	F5H5N1;A0A087WXF6;A0A087WTI3;F5GXJ1;O75251	NADH dehydrogenase [ubiquinone] iron-sulfur protein 7, mitochondrial	NDUFS7	29	+	1.57591	1.05571	0.447096	+	1.7902	1.19696	0.506832	+	2.57173	1.52897	0.671427	NA	NA	NA	NA
438	P17098	Zinc finger protein 8	ZNF8	1798	+	2.73286	0.972947	0.445495	+	2.76226	1.61746	0.702696	+	1.24006	1.2198	0.488557	+	3.94551	2.05044	0.919131
441	P21675;Q8IZX4	Transcription initiation factor TFIID subunit 1;Transcription initiation factor TFIID subunit 1-like	TAF1;TAF1L	1842	+	2.0718	0.999152	0.442175	+	3.01883	1.57118	0.694749	+	2.58543	1.37139	0.610363	+	4.67905	2.15913	0.990027
460	C9JR56;Q9UPW6	DNA-binding protein SATB;DNA-binding protein SATB2	SATB2	563	+	3.23328	0.923213	0.431408	+	5.48978	1.90349	0.899634	NA	NA	NA	NA	+	3.46932	1.25362	0.577185
463	Q01826	DNA-binding protein SATB1	SATB1	2411	+	1.1879	1.06226	0.429927	+	2.96365	1.4947	0.662871	NA	NA	NA	NA	+	4.28583	1.71425	0.79067
467	Q14865	AT-rich interactive domain-containing protein 5B	ARID5B	2641	+	1.63628	0.992195	0.426295	+	4.51001	4.20347	1.76861	+	1.31626	1.29921	0.519728	+	3.54573	3.52021	1.42657
468	P53985;Q5T8R5	Monocarboxylate transporter 1	SLC16A1	2203	+	1.97259	0.964427	0.425999	+	3.27811	1.06894	0.495104	+	2.99608	1.24919	0.57244	+	3.2558	1.08201	0.50035
470	Q13547;Q5TEE2	Histone deacetylase 1	HDAC1	2562	NA	NA	NA	NA	+	9.42519	6.69682	3.20546	+	4.81121	1.7762	0.84244	+	7.81502	3.38241	1.6233
474	Q969R5	Lethal(3)malignant brain tumor-like protein 2	L3MBTL2	3457	NA	NA	NA	NA	+	4.36878	3.91336	1.65042	+	1.07908	1.32701	0.507499	+	1.50682	1.25186	0.511598
478	Q8IWI9	MAX gene-associated protein	MGA	3158	NA	NA	NA	NA	+	5.16792	2.89147	1.31451	+	2.92697	1.32631	0.602778	+	2.84397	0.955639	0.440008
482	Q9ULU4;A0A0A0MTK7	Protein kinase C-binding protein 1	ZMYND8	4246	NA	NA	NA	NA	+	2.42711	3.03265	1.13965	+	5.78787	4.66024	2.1372	+	5.54334	3.54044	1.60128
492	Q9Y253	DNA polymerase eta	POLH	4291	NA	NA	NA	NA	+	3.83741	2.00348	0.896096	+	3.98784	2.9411	1.2987	+	2.78501	1.55519	0.679955
496	A0A087WYK6		ACACA	106	NA	NA	NA	NA	+	1.52579	2.48746	0.864389	+	1.22226	3.2528	0.973069	+	1.58444	2.94528	0.980883
497	C9JLI6;H0YMV8;Q71UM5	40S ribosomal protein S27;40S ribosomal protein S27-like	RPS27L	552	NA	NA	NA	NA	+	3.39905	1.94735	0.85592	+	2.5227	2.33607	0.959537	+	2.44552	2.50492	0.985705
518	Q15652	Probable JmjC domain-containing histone demethylation protein 2C	JMJD1C	2710	NA	NA	NA	NA	+	3.6679	1.53208	0.698495	+	3.12252	1.56158	0.705369	+	4.0289	1.58833	0.730996
521	Q8N1G0;F8WCX2;H0Y5I5	Zinc finger protein 687	ZNF687	3207	NA	NA	NA	NA	+	3.61245	1.51248	0.688935	+	4.81155	2.77231	1.27806	+	5.25736	2.23033	1.038
527	O60885;M0QZD9	Bromodomain-containing protein 4	BRD4	1459	NA	NA	NA	NA	+	4.68261	1.41077	0.666081	+	3.7952	1.82211	0.835919	+	4.70578	1.72073	0.803092
531	O15090;K7EKT4	Zinc finger protein 536	ZNF536	1349	NA	NA	NA	NA	+	2.08529	1.55919	0.649026	+	1.94308	1.84966	0.747586	+	2.37809	2.03063	0.827766
534	Q9NSC2;H3BSM9	Sal-like protein 1	SALL1	4017	NA	NA	NA	NA	+	5.86495	1.30992	0.633159	+	3.36053	1.57224	0.717441	+	4.17111	1.19117	0.561251
556	O94842	TOX high mobility group box family member 4	TOX4	1544	NA	NA	NA	NA	+	2.63807	1.24883	0.555876	+	2.11499	1.43169	0.613799	+	2.43018	1.11993	0.499132
566	I3L2J0;A0A0A0MQR4;Q96RK0	Protein capicua homolog	CIC	1146	NA	NA	NA	NA	+	2.53369	1.17349	0.523124	+	1.88973	1.1741	0.508134	+	2.23481	1.15224	0.506311
570	P62280;M0QZC5	40S ribosomal protein S11	RPS11	2312	NA	NA	NA	NA	+	2.64442	1.15563	0.518794	+	2.39284	1.12587	0.506138	+	6.09224	1.08147	0.52702
573	Q6W2J9;H7BYY2	BCL-6 corepressor	BCOR	3012	NA	NA	NA	NA	+	3.8093	1.09139	0.512403	+	3.54236	1.64577	0.753755	+	3.03552	0.97386	0.450672
591	Q15911	Zinc finger homeobox protein 3	ZFHX3	2733	NA	NA	NA	NA	+	1.14128	1.27827	0.494148	+	3.16692	3.64824	1.46591	+	1.54539	1.73191	0.665153
604	O95625	Zinc finger and BTB domain-containing protein 11	ZBTB11	1588	NA	NA	NA	NA	+	0.815708	1.31042	0.46788	+	2.63408	3.48435	1.33426	+	1.68943	1.33178	0.548935
606	Q9NS73;S4R3N2;A0A087X1L0;S4R2X9;S4R3P6	MAP3K12-binding inhibitory protein 1	MBIP	4012	NA	NA	NA	NA	+	2.86127	1.01058	0.463495	+	4.9363	2.23973	1.05205	+	3.05567	1.04096	0.479598
611	H7C4X9		ZMYND8	1124	NA	NA	NA	NA	+	1.99933	1.05694	0.462517	+	2.91017	1.98122	0.860731	+	3.80371	1.93019	0.865425
636	Q96C00;A0A087X1K1	Zinc finger and BTB domain-containing protein 9	ZBTB9	3483	NA	NA	NA	NA	+	2.39988	0.942034	0.42664	+	2.13957	1.09477	0.486397	+	2.85387	1.09521	0.498706

## Sheet: LSD1 S0=1
LFQ intensity NLS-03	LFQ intensity NLS-02	LFQ intensity NLS-01r	LFQ intensity NLS-01	LFQ intensity LSD1-04	LFQ intensity LSD1-03	LFQ intensity LSD1-02	LFQ intensity LSD1-01	Student's T-test Significant LFQ intensity LSD1_LFQ intensity NLS	Student's T-test significant	Peptides	Razor + unique peptides	Unique peptides	Sequence coverage [%]	Unique + razor sequence coverage [%]	Unique sequence coverage [%]	Mol. weight [kDa]	Q-value	Score	Intensity	MS/MS count	-Log Student's T-test p-value LFQ intensity LSD1_LFQ intensity NLS	Student's T-test q-value LFQ intensity LSD1_LFQ intensity NLS	Student's T-test Difference LFQ intensity LSD1_LFQ intensity NLS	Student's T-test Test statistic LFQ intensity LSD1_LFQ intensity NLS	Protein IDs	Majority protein IDs	Protein names	Gene names	id	Known interactor
21.0292	21.4118	24.4676	21.4273	32.3436	32.5458	32.2393	32.4334	+	LFQ intensity LSD1_LFQ intensity NLS	54	54	54	75.9	75.9	75.9	92.902	0	323.31	133000000000	1398	4.86341	0	10.3066	5.71787	O60341;R4GMQ1;R4GMP9	O60341	Lysine-specific histone demethylase 1A	KDM1A	1434	+
17.566	17.9986	19.1237	16.9168	26.0169	26.0995	25.9043	26.2571	+	LFQ intensity LSD1_LFQ intensity NLS	32	23	23	52.3	40.4	40.4	71.027	0	99.345	2600000000	215	5.63288	0	8.16815	5.55628	P17066;P48741	P17066	Heat shock 70 kDa protein 6	HSPA6	1796
17.977	17.6168	18.6382	17.5878	24.0526	24.8764	24.7492	23.8858	+	LFQ intensity LSD1_LFQ intensity NLS	37	37	37	51.2	51.2	51.2	115.27	0	323.31	1330000000	253	5.79549	0	6.43602	4.77581	O75362;Q9BZ31;A2A326	O75362	Zinc finger protein 217	ZNF217	1483	+
19.8515	18.8238	18.7764	19.0951	27.1115	26.5344	26.8264	25.0148	+	LFQ intensity LSD1_LFQ intensity NLS	98	81	80	45.6	39.5	38.4	276.54	0	323.31	6710000000	908	5.02111	0	7.23511	4.73093	O00763;F8W8T8;H0YGH5;A0A087WUA1	O00763	Acetyl-CoA carboxylase 2;Biotin carboxylase	ACACB	1306
15.5951	18.5878	15.768	16.1317	24.558	24.945	25.4769	23.9495	+	LFQ intensity LSD1_LFQ intensity NLS	27	27	27	61.1	61.1	61.1	59.403	0	305.86	2350000000	310	4.40126	0	8.2117	4.64283	E9PDR0;P05166;C9JQS9;E7EX59;E7ETT1;E7ETT4;E7EUY3;E9PEC3;F8WBI9;E7ENC1;H7C5C9;C9JVW9;C9JAW3;C9JVY9	E9PDR0;P05166;C9JQS9;E7EX59;E7ETT1;E7ETT4;E7EUY3;E9PEC3;F8WBI9	Propionyl-CoA carboxylase beta chain, mitochondrial	PCCB	735
16.9431	18.265	17.2512	18.1946	23.9043	23.5983	23.48	22.6671	+	LFQ intensity LSD1_LFQ intensity NLS	26	26	25	43.6	43.6	42.6	98.14	0	258.25	720000000	150	4.99356	0	5.74896	4.03382	Q9UHJ3;C9IY64	Q9UHJ3	Scm-like with four MBT domains protein 1	SFMBT1	4191
16.8238	18.4933	15.0617	19.0619	23.7077	24.2961	25.1946	24.7441	+	LFQ intensity LSD1_LFQ intensity NLS	22	16	16	53.7	43.8	43.8	55.581	0	192.37	1040000000	138	3.52257	0	7.12546	3.64337	Q9P2K3;B4DV59;E9PQE5;H0YF22;E9PR63;H0YDR8;H0YDD7;E9PPC5	Q9P2K3;B4DV59	REST corepressor 3	RCOR3	4139	+
25.8834	26.1795	26.2714	26.1719	31.1177	30.7373	31.0349	29.995	+	LFQ intensity LSD1_LFQ intensity NLS	54	54	54	69.6	69.6	69.6	80.058	0	323.31	135000000000	2151	5.58909	0	4.59465	3.62074	P05165;H0Y5U0;Q5JTW6;Q5JVH2;H0Y4B9;H0Y798	P05165	Propionyl-CoA carboxylase alpha chain, mitochondrial	PCCA	1662
26.038	25.7208	26.0275	26.1871	30.9539	30.7373	31.1361	29.8188	+	LFQ intensity LSD1_LFQ intensity NLS	42	42	42	64.8	64.8	64.8	80.472	0	323.31	134000000000	2346	5.27998	0	4.66821	3.56774	Q96RQ3;E9PHF7;E9PG35;F5GYT8;G5E9X5;F8WDI3	Q96RQ3;E9PHF7;E9PG35;F5GYT8;G5E9X5	Methylcrotonoyl-CoA carboxylase subunit alpha, mitochondrial	MCCC1	3610
26.509	26.8385	26.6181	26.6458	30.9677	30.9882	31.2979	30.4032	+	LFQ intensity LSD1_LFQ intensity NLS	65	65	65	66.3	66.3	66.3	129.63	0	323.31	153000000000	2250	6.17563	0	4.26144	3.55551	P11498;E9PRE7;E9PS68	P11498	Pyruvate carboxylase, mitochondrial	PC	1738
18.8995	18.963	20.8651	18.7731	24.0359	25.4831	25.2891	24.5404	+	LFQ intensity LSD1_LFQ intensity NLS	34	34	34	41.4	41.4	41.4	110.04	0	204.47	1000000000	149	4.00273	0	5.46194	3.4122	Q9P0K7;D6RE17;D6RB25;D6RBW6;D6RB27;D6R9G4;D6RBY4;D6REL2;D6R9G6;D6RF74	Q9P0K7	Ankycorbin	RAI14	4118
20.4375	19.8832	19.8965	19.1605	23.8764	24.5638	25.002	24.217	+	LFQ intensity LSD1_LFQ intensity NLS	39	39	39	42.6	42.6	42.6	124.29	0	201.56	1540000000	251	4.86356	0	4.57038	3.37086	Q92618;A0A087WUJ4;F5H2K2	Q92618;A0A087WUJ4	Zinc finger protein 516	ZNF516	3408	+
21.6627	22.2961	21.0951	20.9098	25.4923	26.3307	26.5448	25.8997	+	LFQ intensity LSD1_LFQ intensity NLS	40	40	40	51.5	51.5	51.5	136.16	0	323.31	3440000000	362	4.63358	0	4.57594	3.29121	Q14687;H0Y613;H7C3B5;C9JLW9	Q14687;H0Y613	Genetic suppressor element 1	GSE1	2628	+
17.8161	18.0211	18.4757	18.3652	21.6714	21.7634	22.2302	21.8307	+	LFQ intensity LSD1_LFQ intensity NLS	12	12	12	40.4	40.4	40.4	35.812	0	177.51	659000000	70	5.84841	0	3.70444	3.09734	Q9P0W2;B5MDG7;K7EJR8;C9J8X5;C9JQA7;C9K049;F8WES5	Q9P0W2;B5MDG7;K7EJR8	SWI/SNF-related matrix-associated actin-dependent regulator of chromatin subfamily E member 1-related	HMG20B	4123	+
18.9344	18.265	19.4496	18.4736	22.2961	22.7327	22.9864	22.6209	+	LFQ intensity LSD1_LFQ intensity NLS	46	46	46	31.3	31.3	31.3	221.36	0	323.31	905000000	205	4.88349	0	3.87838	2.9843	A0A087WTW5;Q9UKL3;A0A096LP21	A0A087WTW5;Q9UKL3	CASP8-associated protein 2	CASP8AP2	34
20.2185	20.5069	19.3101	19.8861	23.9495	23.6865	23.5285	23.6649	+	LFQ intensity LSD1_LFQ intensity NLS	31	31	31	24.2	24.2	24.2	232.76	0	139.38	624000000	111	5.03142	0	3.72696	2.93102	Q96BY7;H7C3T2;Q2TAZ0	Q96BY7	Autophagy-related protein 2 homolog B	ATG2B	3481
28.6697	27.6251	27.6181	27.4785	32.6307	32.5934	32.4007	31.0217	+	LFQ intensity LSD1_LFQ intensity NLS	169	169	145	74.3	74.3	64.8	265.55	0	323.31	354000000000	5379	4.01357	0	4.3138	2.92988	Q13085;Q59FY4;A0A0C4DGT1;A0A087WWN5;A0A087X2F8;A0A087WYS8	Q13085	Acetyl-CoA carboxylase 1;Biotin carboxylase	ACACA	2514
17.9937	19.3273	17.8269	19.0249	21.7223	23.4551	23.9584	23.8191	+	LFQ intensity LSD1_LFQ intensity NLS	14	14	14	14.2	14.2	14.2	183.09	0	40.849	301000000	46	3.49708	0	4.69554	2.8691	Q8TDY2	Q8TDY2	RB1-inducible coiled-coil protein 1	RB1CC1	3331
18.4153	17.5645	17.497	18.1822	21.1886	22.4066	21.4626	21.7836	+	LFQ intensity LSD1_LFQ intensity NLS	3	3	3	7.2	7.2	7.2	86.082	0	13.368	128000000	8	4.46177	0	3.79561	2.81828	Q96II8;E9PD99	Q96II8;E9PD99	Leucine-rich repeat and calponin homology domain-containing protein 3	LRCH3	3552
20.3962	20.4576	18.1357	18.0255	23.8385	24.1871	23.6649	24.5105	+	LFQ intensity LSD1_LFQ intensity NLS	20	20	19	33.8	33.8	33.1	125.61	0	232.9	647000000	121	3.31163	0	4.79645	2.81584	Q13625;H7C5L8	Q13625	Apoptosis-stimulating of p53 protein 2	TP53BP2	2570
18.6132	18.2597	18.849	18.3098	21.8346	21.6006	21.7182	21.6714	+	LFQ intensity LSD1_LFQ intensity NLS	6	6	6	21.5	21.5	21.5	44.139	0	46.031	128000000	32	6.2206	0	3.19826	2.78975	Q9C0F1;D6RGX6;D6RBX1;D6RC25	Q9C0F1;D6RGX6	Centrosomal protein of 44 kDa	CEP44	3808
19.185	20.9098	22.3752	19.3879	24.8433	25.141	25.7543	25.6513	+	LFQ intensity LSD1_LFQ intensity NLS	53	53	47	85.4	85.4	77.1	53.327	0	323.31	84800000000	1276	3.12897	0	4.88303	2.75163	J3KN32;Q9UKL0;H0YNY4	J3KN32;Q9UKL0	REST corepressor 1	RCOR1	1163	+
20.4676	19.8802	18.9402	19.4894	23.0493	23.4676	23.2821	23.3376	+	LFQ intensity LSD1_LFQ intensity NLS	25	25	25	32.7	32.7	32.7	102.28	0	108.86	662000000	150	4.41988	0	3.58979	2.69194	A0A087X211;Q8TCG1;F8WF26;F8WAX6	A0A087X211;Q8TCG1	Protein CIP2A	KIAA1524	161
18.3321	17.227	19.8438	19.8515	22.8932	23.2821	23.2229	23.3511	+	LFQ intensity LSD1_LFQ intensity NLS	16	16	16	37.3	37.3	37.3	69.239	0	112.96	363000000	57	3.29401	0	4.37371	2.6568	Q96LB3;E5RIF0;E5RH29;E5RGX6;E5RJK3	Q96LB3	Intraflagellar transport protein 74 homolog	IFT74	3578
18.9171	19.3343	22.6386	18.0691	24.7695	25.1604	25.0894	25.1833	+	LFQ intensity LSD1_LFQ intensity NLS	35	35	28	43	43	37.9	128.47	0	199.04	1280000000	182	2.72878	0	5.31088	2.6474	X6RLX0;Q8IUD2;G8JLD3;X6RM00;K7EPP6;K7EPD6;K7EP25;K7EIZ7;K7EKH8	X6RLX0;Q8IUD2;G8JLD3;X6RM00	ELKS/Rab6-interacting/CAST family member 1	ERC1	3143
19.4874	19.0532	19.4476	19.719	22.4898	22.8054	22.6186	22.2273	+	LFQ intensity LSD1_LFQ intensity NLS	7	7	7	34.1	34.1	34.1	37.353	0	36.672	377000000	83	5.56213	0	3.10848	2.62562	Q9H6J7;E9PI12;E9PI28;H0YDJ0	Q9H6J7;E9PI12	UPF0705 protein C11orf49	C11orf49	3889
20.8876	21.895	21.5213	21.502	24.2607	24.8764	25.6458	25.3645	+	LFQ intensity LSD1_LFQ intensity NLS	44	44	44	40.6	40.6	40.6	181.42	0	323.31	2170000000	377	4.17016	0	3.58536	2.62014	Q92766;C9JU34;A0A087X055;C9JPJ6;C9JE09	Q92766;C9JU34	Ras-responsive element-binding protein 1	RREB1	3418	+
19.4148	19.3288	18.023	19.0975	23.2678	22.8288	22.4501	21.9316	+	LFQ intensity LSD1_LFQ intensity NLS	15	15	15	30.5	30.5	30.5	78.893	0	41.661	331000000	60	3.84446	0	3.65354	2.55719	Q8IUZ0;H0YKE9;H0YNV5;H0YM43;H0YMZ6;H0YMT2;A0A0B4J283;H0YNI5;H0YLZ6;H0YKI5;H0YLQ8;H0YKQ0	Q8IUZ0	Leucine-rich repeat-containing protein 49	LRRC49	3145
18.3569	18.2164	17.7519	17.7711	21.1457	21.0886	20.8034	21.7389	+	LFQ intensity LSD1_LFQ intensity NLS	25	3	3	26.7	3.3	3.3	127.14	0	5.1567	152000000	31	4.83343	0	3.17009	2.5365	H3BU53	H3BU53		MGA	1096
24.4298	23.867	24.0443	24.0526	27.0084	26.976	27.1507	26.726	+	LFQ intensity LSD1_LFQ intensity NLS	36	36	34	43.1	43.1	41.9	118.13	0	323.31	8130000000	564	5.91565	0	2.86684	2.49775	Q9ULH7;I3L2S3;B0QY84;I3L2A0;Q8IZQ8	Q9ULH7	MKL/myocardin-like protein 2	MKL2	4240
18.2466	18.4496	19.4004	18.4696	21.654	21.8385	21.8269	21.8152	+	LFQ intensity LSD1_LFQ intensity NLS	5	5	5	41	41	41	22.782	0	37.284	136000000	42	4.69504	0	3.14209	2.49064	P04792;F8WE04;C9J3N8	P04792;F8WE04	Heat shock protein beta-1	HSPB1	1652
21.8499	20.9882	21.7995	21.7955	24.4041	24.5045	24.4923	24.7234	+	LFQ intensity LSD1_LFQ intensity NLS	29	29	29	44.8	44.8	44.8	108.62	0	133.87	1180000000	195	4.97304	0	2.92278	2.3998	Q7Z4H7;Q5VY60;Q5SYF9	Q7Z4H7;Q5VY60	HAUS augmin-like complex subunit 6	HAUS6	3071	+
18.0364	18.2001	18.9289	19.4835	21.6928	21.7471	21.9882	22.5938	+	LFQ intensity LSD1_LFQ intensity NLS	5	5	5	19.9	19.9	19.9	29.793	0	4.5595	225000000	10	3.83485	0	3.34326	2.39853	Q0PNE2;H7BZM9;C9JLH5;C9JA82;C9J2D6;C9J9N8;C9JEX8;C9IYN7;F8WE64	Q0PNE2;H7BZM9	Elongator complex protein 6	ELP6	2474
18.1436	17.6242	19.1104	17.9794	21.8651	21.8307	21.4726	20.7715	+	LFQ intensity LSD1_LFQ intensity NLS	4	4	4	40	40	40	12.755	0	9.062	85900000	13	3.70415	0	3.27059	2.32503	A0A087WV05;Q99417;A0A0D9SEI7	A0A087WV05;Q99417	C-Myc-binding protein	MYCBP	58
27.1795	27.2714	27.6998	27.189	29.6595	30.1483	30.3515	30.2535	+	LFQ intensity LSD1_LFQ intensity NLS	133	133	133	50.5	50.5	50.5	267.29	0	323.31	79500000000	2899	5.09115	0	2.7683	2.31267	P12270;Q5SWX9	P12270	Nucleoprotein TPR	TPR	1749
20.9098	22.1238	22.714	20.9812	26.7518	25.0233	25.2133	24.7746	+	LFQ intensity LSD1_LFQ intensity NLS	52	52	40	73.5	73.5	61.5	74.853	0	323.31	62200000000	709	3.00909	0	3.75853	2.30834	Q96BD5;E9PLU5;E9PR02;E9PS51;E9PLV4;H0YEK2;H0YCI1;E9PNW9;E9PNN4	Q96BD5	PHD finger protein 21A	PHF21A	3472	+
17.4664	17.503	18.683	17.7152	20.7955	20.68	20.7553	20.8113	+	LFQ intensity LSD1_LFQ intensity NLS	8	8	8	14	14	14	134.75	0	21.705	102000000	22	4.2772	0	2.91863	2.26745	Q9P1Y5	Q9P1Y5	Calmodulin-regulated spectrin-associated protein 3	CAMSAP3	4124
24.141	24.4676	23.7895	24.141	26.8504	27.0813	27.0813	26.4378	+	LFQ intensity LSD1_LFQ intensity NLS	66	66	54	57.5	57.5	42.2	154.91	0	323.31	9720000000	931	4.94804	0	2.72791	2.26304	Q9UBW7	Q9UBW7	Zinc finger MYM-type protein 2	ZMYM2	4165	+
22.1079	21.5961	20.1703	19.0506	24.7543	24.8093	24.5165	24.1795	+	LFQ intensity LSD1_LFQ intensity NLS	35	35	35	35	35	35	133.06	0	323.31	2080000000	303	2.78245	0	3.83369	2.2435	O75182;M0QYC5;M0R271	O75182;M0QYC5	Paired amphipathic helix protein Sin3b	SIN3B	1478
21.0886	20.5731	20.4576	20.3645	23.2961	23.5522	22.937	23.417	+	LFQ intensity LSD1_LFQ intensity NLS	130	2	2	63.7	0.6	0.6	278.22	0	13.369	990000000	63	4.86317	0	2.67959	2.21698	Q60FE5;A0A087WWY3	Q60FE5;A0A087WWY3		FLNA	2915
18.9044	19.0629	18.2535	19.1713	21.265	21.7876	22.58	21.6186	+	LFQ intensity LSD1_LFQ intensity NLS	10	9	9	25.4	23.9	23.9	58.011	0	44.557	168000000	36	3.85968	0	2.96478	2.20309	Q8IZ40	Q8IZ40	REST corepressor 2	RCOR2	3192	+
17.6414	17.4977	19.6222	19.266	22.7182	22.4898	21.7553	21.2764	+	LFQ intensity LSD1_LFQ intensity NLS	30	30	30	40.7	40.7	40.7	134.42	0	323.31	478000000	103	2.84112	0	3.55307	2.16675	Q96R06;K7ELG0;F5GZT2;K7ELC8;J3KTQ0;E9PMD0;J3KSV2;J3QRV8	Q96R06	Sperm-associated antigen 5	SPAG5	3604
21.4015	21.3752	19.7504	19.7089	23.6757	23.8764	23.5285	24.019	+	LFQ intensity LSD1_LFQ intensity NLS	46	46	46	30.8	30.8	30.8	256.86	0	323.31	1040000000	206	3.21762	0	3.21593	2.15692	A0A087WW06;Q96AY4;B0QYP4;B0QYP5	A0A087WW06;Q96AY4	Tetratricopeptide repeat protein 28	TTC28	70
17.3158	17.3652	17.7195	19.1	20.8499	21.1457	21.2764	20.6186	+	LFQ intensity LSD1_LFQ intensity NLS	6	6	6	14	14	14	93.772	0	45.839	98700000	20	3.36807	0	3.09755	2.14591	Q96D09	Q96D09	G-protein coupled receptor-associated sorting protein 2	GPRASP2	3495
21.4066	20.9459	19.7273	21.5069	23.5754	24.0935	24.0105	24.002	+	LFQ intensity LSD1_LFQ intensity NLS	43	43	43	23	23	23	308.57	0	270.39	961000000	211	3.41228	0	3.02364	2.12208	E7EMW7;O95071;E7ET84;E5RFK7;H0YBB4	E7EMW7;O95071	E3 ubiquitin-protein ligase UBR5	UBR5	664
18.6117	17.7034	21.3376	18.6381	22.7796	22.5708	22.8633	22.9847	+	LFQ intensity LSD1_LFQ intensity NLS	6	6	6	6.9	6.9	6.9	167.35	0	15.105	357000000	12	2.48484	0	3.72689	2.08157	Q08378;A0A087WV43	Q08378	Golgin subfamily A member 3	GOLGA3	2463
18.7062	17.7134	17.4464	17.5048	20.3645	21.4726	20.5915	20.4375	+	LFQ intensity LSD1_LFQ intensity NLS	4	4	4	18.6	18.6	18.6	40.368	0	8.0288	50500000	6	3.49636	0	2.87382	2.0679	E9PKG6;V9HW75;A0A087WSV8;P80303;Q2L696;E9PLR0;E9PLE9;E9PJP3;H0YD18;E9PM22;H0YEG8	E9PKG6;V9HW75;A0A087WSV8;P80303;Q2L696;E9PLR0;E9PLE9	Nucleobindin-2;Nesfatin-1	NUCB2;HEL-S-109;Nucb2	22
17.642	17.9973	18.8607	18.3429	20.9672	20.8576	20.6886	20.7955	+	LFQ intensity LSD1_LFQ intensity NLS	5	5	5	10.8	10.8	10.8	100.43	0	11.016	55700000	10	4.19548	0	2.61649	2.06658	Q8NEL9;A0A087X0H7	Q8NEL9;A0A087X0H7	Phospholipase DDHD1	DDHD1	3279
24.4862	24.4984	24.1871	24.4234	26.9539	26.6458	26.6865	26.4938	+	LFQ intensity LSD1_LFQ intensity NLS	19	19	19	63.3	63.3	63.3	32.251	0	323.31	6070000000	361	5.87875	0	2.29625	2.05009	O43396;K7ER96;K7EML9;K7EPB7;K7EME7;K7EKG2	O43396;K7ER96	Thioredoxin-like protein 1	TXNL1	1394
20.4676	20.3962	20.5165	20.5545	22.9654	22.5938	22.8171	22.5708	+	LFQ intensity LSD1_LFQ intensity NLS	11	11	11	14.4	14.4	14.4	168.9	0	236.11	333000000	68	6.29283	0	2.25307	2.04767	Q7Z3T8;H0YAB1	Q7Z3T8	Zinc finger FYVE domain-containing protein 16	ZFYVE16	3063
19.5223	19.3101	18.9686	19.8238	21.7594	21.632	21.8839	22.0426	+	LFQ intensity LSD1_LFQ intensity NLS	11	11	11	20	20	20	83.641	0	51.512	165000000	42	4.71438	0	2.42329	2.01911	Q9UHD2;F5H206;F5H1A3;F5GZI4	Q9UHD2	Serine/threonine-protein kinase TBK1	TBK1	4187
22.6276	22.5498	22.8538	22.5638	24.9933	24.918	24.7234	24.7796	+	LFQ intensity LSD1_LFQ intensity NLS	27	27	27	39.6	39.6	39.6	107.17	0	193.77	1660000000	257	6.40992	0	2.20483	2.01574	Q8TD19;G3V459;G3V2Z5;G3V5V0;REV__Q5SQT3;REV__Q9P0M6	Q8TD19	Serine/threonine-protein kinase Nek9	NEK9	3324
19.1053	16.962	19.2535	19.5165	21.3266	22.3045	22.2036	22.0393	+	LFQ intensity LSD1_LFQ intensity NLS	7	7	7	40.7	40.7	40.7	47.687	0	31.211	188000000	43	2.68904	0	3.25917	2.0011	Q13501;E7EMC7;E9PFW8;D6RBF1;C9J6J8;C9JRJ8;E3W990	Q13501;E7EMC7	Sequestosome-1	SQSTM1	2555
19.8222	19.6645	20.417	18.0705	22.2302	22.4196	22.6409	22.8152	+	LFQ intensity LSD1_LFQ intensity NLS	11	11	11	14.7	14.7	14.7	122.37	0	29.952	276000000	43	2.96332	0	3.03292	1.99893	O43683	O43683	Mitotic checkpoint serine/threonine-protein kinase BUB1	BUB1	1406
18.8269	20.5915	19.7488	20.1581	22.8054	22.7895	22.2302	22.68	+	LFQ intensity LSD1_LFQ intensity NLS	40	40	1	24.2	24.2	0.9	296.67	0	323.31	795000000	203	3.36965	0	2.79499	1.99659	F5H212;A0A0D9SFF3;C9JLG1	F5H212		HIVEP1	849
21.4066	21.0359	21.0088	20.2419	23.4551	23.4298	23.1457	23.5404	+	LFQ intensity LSD1_LFQ intensity NLS	18	18	18	34.7	34.7	34.7	79.817	0	121.31	517000000	99	4.11781	0	2.46943	1.96116	Q96T51;H0YA47;J3KPP6;H0Y9Y8;H0YAC8	Q96T51	RUN and FYVE domain-containing protein 1	RUFY1	3634
17.8198	18.3833	18.1676	18.6147	20.7715	20.68	20.4775	20.3857	+	LFQ intensity LSD1_LFQ intensity NLS	4	4	4	13.9	13.9	13.9	47.815	0	5.7916	62100000	10	4.73706	0	2.33235	1.95841	Q92844;E7EQA9;E7EWR8;E7EM55;E7ERM9;E7EV32;E7EMT6;E7ENY2;H7BZ28;E7EVA2;E7EW82;H7C3L4	Q92844;E7EQA9	TRAF family member-associated NF-kappa-B activator	TANK	3424
22.3936	21.895	22.0459	22.2155	24.2535	24.3712	24.2244	24.4234	+	LFQ intensity LSD1_LFQ intensity NLS	20	20	20	21.6	21.6	21.6	150.07	0	220.43	1470000000	266	5.80123	0	2.18059	1.95128	Q6Y7W6;I1E4Y6;E7ESB6;C9JHW1;C9JH18;F8WCD5;C9JPV7;C9JXQ0;C9J0V6;C9JHT0;C9JRZ2;C9JW88;C9JH78;C9IYH5;C9J7G1;B8ZZD2	Q6Y7W6;I1E4Y6;E7ESB6;C9JHW1	PERQ amino acid-rich with GYF domain-containing protein 2	GIGYF2	3015
20.9316	22.2448	21.8538	21.654	24.0935	24.1174	24.1946	24.0275	+	LFQ intensity LSD1_LFQ intensity NLS	36	36	36	26.5	26.5	26.5	210.63	0	282.08	980000000	234	3.91805	0.000435897	2.4372	1.90781	Q96Q89;A0A0A0MSJ5	Q96Q89	Kinesin-like protein KIF20B	KIF20B	3600
17.4322	18.9398	19.2843	18.8548	21.5777	21.4066	21.343	20.9024	+	LFQ intensity LSD1_LFQ intensity NLS	7	7	7	36.3	36.3	36.3	32.179	0	49.469	196000000	38	3.08254	0.000745342	2.67967	1.869	P57052	P57052	Splicing regulator RBM11	RBM11	2242
21.1886	20.4066	20.7471	20.2066	23.1079	22.6431	22.9933	23.0071	+	LFQ intensity LSD1_LFQ intensity NLS	23	23	23	13.5	13.5	13.5	294.36	0	47.454	463000000	70	4.15574	0.000731707	2.30061	1.85868	Q9UPU5	Q9UPU5	Ubiquitin carboxyl-terminal hydrolase 24	USP24	4273
17.9161	17.7139	18.1801	19.6294	21.7675	20.6627	21.3045	20.7796	+	LFQ intensity LSD1_LFQ intensity NLS	5	5	4	4.7	4.7	3.8	197.4	0	9.6449	105000000	24	2.8213	0.000705882	2.7687	1.84209	A0A0A0MRJ3;Q8NEY1;H7BZD9	A0A0A0MRJ3;Q8NEY1	Neuron navigator 1	NAV1	202
22.4923	22.1301	22.0983	22.5869	24.8093	24.632	24.9316	24.0275	+	LFQ intensity LSD1_LFQ intensity NLS	24	24	24	49.7	49.7	49.7	61.332	0	293.81	2010000000	324	4.14426	0.000701754	2.27321	1.83912	Q9HCC0;D6RD67;D6RDF7;D6R9R1	Q9HCC0;D6RD67;D6RDF7	Methylcrotonoyl-CoA carboxylase beta chain, mitochondrial	MCCC2	3948
20.1703	17.0068	17.2587	18.7096	22.3045	21.5165	21.6276	20.8423	+	LFQ intensity LSD1_LFQ intensity NLS	11	11	11	25.4	25.4	25.4	102.61	0	62.519	156000000	36	2.22479	0.00099422	3.28636	1.83552	I6L8A6;Q99708;J3QSH7;F6Q6H0;J3QLH2;J3QL00;J3QLW6	I6L8A6;Q99708	DNA endonuclease RBBP8	RBBP8	1157
19.7406	17.8183	17.5793	18.4504	21.0426	20.68	21.4324	21.5961	+	LFQ intensity LSD1_LFQ intensity NLS	14	14	14	10	10	10	254.41	0	27.048	166000000	25	2.74089	0.000982857	2.79061	1.82902	O75165;H0YA63;H0Y8Q2	O75165	DnaJ homolog subfamily C member 13	DNAJC13	1476
23.2821	22.7816	23.2821	22.8932	25.1371	25.2096	24.9495	25.417	+	LFQ intensity LSD1_LFQ intensity NLS	35	35	2	40.7	40.7	2.8	113.65	0	306.94	2030000000	278	4.90498	0.000966292	2.11857	1.82278	O75150;H3BS50	O75150	E3 ubiquitin-protein ligase BRE1B	RNF40	1472
19.3603	18.7896	19.8817	18.593	21.002	21.4972	22.1734	22.2448	+	LFQ intensity LSD1_LFQ intensity NLS	12	12	12	11.1	11.1	11.1	160.16	0	51.053	148000000	25	3.09162	0.000955556	2.57319	1.81868	Q9NS87;C9JKA9;D6RCT7;H7BZT2	Q9NS87;C9JKA9	Kinesin-like protein KIF15	KIF15	4014
28.2308	28.1842	27.7518	27.8858	30.3088	30.2535	29.8385	29.8799	+	LFQ intensity LSD1_LFQ intensity NLS	132	132	4	64.1	64.1	1.6	280.74	0	323.31	76100000000	2687	4.73223	0.000855721	2.05704	1.76007	P21333;Q5HY54;F8WE98;H0Y5F3;H7C2E7	P21333;Q5HY54	Filamin-A	FLNA	1839
18.2118	18.3289	19.1531	19.3123	20.6627	21.1143	21.2244	21.2361	+	LFQ intensity LSD1_LFQ intensity NLS	3	3	3	10.3	10.3	10.3	67.299	0	7.3278	78500000	22	3.50755	0.000851485	2.30783	1.75968	Q6UUV9;M0QXN6;M0QX46	Q6UUV9;M0QXN6;M0QX46	CREB-regulated transcription coactivator 1	CRTC1	3006
17.624	18.6326	19.6665	18.4601	21.0821	21.4118	21.3101	20.714	+	LFQ intensity LSD1_LFQ intensity NLS	21	21	21	11.5	11.5	11.5	425.23	0	47.143	167000000	47	2.88695	0.000839024	2.53369	1.75099	A0A087WV20;A0A087WTU9;A0A087WZY3;Q8TCU4;H7C1D9	A0A087WV20;A0A087WTU9;A0A087WZY3;Q8TCU4	Alstrom syndrome protein 1	ALMS1	31
18.2463	18.1444	20.6006	18.4327	21.3699	21.7471	21.6276	21.8346	+	LFQ intensity LSD1_LFQ intensity NLS	20	20	20	11.2	11.2	11.2	376.01	0	83.054	221000000	44	2.47847	0.000834951	2.78878	1.75038	Q14789;E7EU81;H0Y867;H7C5I7	Q14789;E7EU81;H0Y867	Golgin subfamily B member 1	GOLGB1	2637
25.0443	25.2856	25.1095	25.3101	26.9428	27.0505	27.1795	27.189	+	LFQ intensity LSD1_LFQ intensity NLS	29	29	29	67.1	67.1	67.1	50.227	0	291.81	7020000000	478	6.2041	0.000826923	1.90308	1.74965	Q9Y265;E7ETR0;H7C4G5;H7C4I3;J3QLR1	Q9Y265;E7ETR0	RuvB-like 1	RUVBL1	4293
25.3811	25.5344	24.8997	25.1871	27.3578	27.341	27.6527	26.965	+	LFQ intensity LSD1_LFQ intensity NLS	33	33	33	58.8	58.8	58.8	74.484	0	323.31	12500000000	736	4.37747	0.0008	2.07854	1.73727	Q86T24	Q86T24	Transcriptional regulator Kaiso	ZBTB33	3090
20.1825	21.0821	20.2066	20.5823	22.7995	22.7715	22.5141	22.4825	+	LFQ intensity LSD1_LFQ intensity NLS	18	18	18	44.7	44.7	44.7	69.666	0	146.95	487000000	100	4.0846	0.000792627	2.12851	1.73554	Q14145;K7EJ49;K7EJD8;K7ESE0;K7EQX2;K7EPZ3	Q14145	Kelch-like ECH-associated protein 1	KEAP1	2591
24.0105	23.632	23.5404	23.8191	25.9716	25.7619	25.5841	25.5609	+	LFQ intensity LSD1_LFQ intensity NLS	18	18	18	60	60	60	40.572	0	194.5	2120000000	220	5.07147	0.000785388	1.96912	1.72544	Q9UNZ2;F2Z2K0;R4GNE6;G3V4V8;R4GMY2	Q9UNZ2;F2Z2K0	NSFL1 cofactor p47	NSFL1C	4265
22.1581	21.3266	22.1946	22.2096	23.9847	23.8288	24.275	24.5463	+	LFQ intensity LSD1_LFQ intensity NLS	31	31	31	35	35	35	139.09	0	176.48	883000000	157	3.74156	0.000781818	2.18647	1.72475	E7EX90;Q14203;Q6AWB1;E7EWF7;C9J1B7;C9JZA4;C9JTE5;C9JJN7;C9JJD0;C9JKG6;E9PCY0	E7EX90;Q14203;Q6AWB1	Dynactin subunit 1	DCTN1;DKFZp686E0752	721
24.5404	24.2535	24.4488	24.5696	26.3393	26.3728	26.1391	26.3992	+	LFQ intensity LSD1_LFQ intensity NLS	83	83	83	46.2	46.2	46.2	225.49	0	323.31	4530000000	628	6.00286	0.000754386	1.8595	1.70182	Q14008;H0YDX5;E9PQH5;H0YCF6;H0YEK7	Q14008	Cytoskeleton-associated protein 5	CKAP5	2581
17.8605	17.4513	17.8558	19.0924	20.3645	20.4972	20.4676	20.1946	+	LFQ intensity LSD1_LFQ intensity NLS	6	6	6	13.9	13.9	13.9	82.015	0	20.438	115000000	33	3.16219	0.000747826	2.31598	1.70025	Q9Y2K1;G3V3N0;G3V2I8;G3V447	Q9Y2K1	Zinc finger and BTB domain-containing protein 1	ZBTB1	4303
18.528	18.0899	19.4476	18.2072	22.0258	20.9316	20.5165	20.6971	+	LFQ intensity LSD1_LFQ intensity NLS	27	27	27	36.4	36.4	36.4	122.84	0	222.78	380000000	63	2.78364	0.000744589	2.47456	1.69808	P82094;A0A0A0MTG4;F8WF45	P82094;A0A0A0MTG4;F8WF45	TATA element modulatory factor	TMF1	2378
17.3008	18.7029	19.0019	19.1604	20.5915	20.8651	21.0224	22.1426	+	LFQ intensity LSD1_LFQ intensity NLS	4	4	4	9.8	9.8	9.8	62.196	0	7.8058	118000000	9	2.52391	0.000738197	2.61392	1.69265	A0A0A0MSS3;Q8ND83;C9JP03;C9JD09;C9JUW9;X6RDJ2;Q5T6P1;X6RGK9;A0A0C4DFN6;Q5T6P2;Q5T6P5;B7Z326	A0A0A0MSS3;Q8ND83;C9JP03;C9JD09;C9JUW9;X6RDJ2;Q5T6P1;X6RGK9;A0A0C4DFN6;Q5T6P2	SLAIN motif-containing protein 1	SLAIN1	233
17.0239	18.6628	17.5597	19.1284	20.6453	20.1332	21.1206	20.8034	+	LFQ intensity LSD1_LFQ intensity NLS	4	4	4	20.9	20.9	20.9	39.945	0	8.9864	60100000	9	2.56632	0.000735043	2.58192	1.69078	Q02833;H0YEI0	Q02833;H0YEI0	Ras association domain-containing protein 7	RASSF7	2425
24.3975	23.8858	24.1174	24.1642	26.5492	26.0854	25.8361	26.0443	+	LFQ intensity LSD1_LFQ intensity NLS	18	18	18	61.2	61.2	61.2	33.83	0	266.33	5960000000	357	4.43724	0.000722689	1.98749	1.6795	P46108;I3L297	P46108	Adapter molecule crk	CRK	2069
18.3105	18.2939	20.6096	18.8213	21.9742	21.4015	21.2764	21.8727	+	LFQ intensity LSD1_LFQ intensity NLS	9	9	8	10.1	10.1	9.4	142.82	0	17.65	175000000	24	2.41902	0.000704918	2.62234	1.66623	P11274;A9UF01;H0Y554;I3L1U8	P11274	Breakpoint cluster region protein	BCR	1733
18.7535	17.6249	18.8736	19.8406	21.5356	21.1332	20.8269	21.4066	+	LFQ intensity LSD1_LFQ intensity NLS	6	6	6	11.5	11.5	11.5	98.655	0	59.612	123000000	36	2.65726	0.000699187	2.45245	1.65705	P42566;B1AUU8	P42566;B1AUU8	Epidermal growth factor receptor substrate 15	EPS15	2043
22.3988	21.8461	21.8152	21.7634	24.0359	23.7695	23.8385	23.8385	+	LFQ intensity LSD1_LFQ intensity NLS	31	31	31	34	34	34	120.75	0	266.53	1160000000	278	4.69564	0.000693548	1.91468	1.65152	Q9C0B7	Q9C0B7	Transport and Golgi organization protein 6 homolog	TANGO6	3804
22.8385	22.6006	23.5983	21.3538	24.5522	24.9716	25.2891	25.5522	+	LFQ intensity LSD1_LFQ intensity NLS	6	6	6	52.9	52.9	52.9	8.2178	0	34.253	2210000000	116	2.54785	0.000677165	2.49346	1.64758	P63173;J3KT73;J3QL01;J3KSP2	P63173;J3KT73;J3QL01	60S ribosomal protein L38	RPL38	2348
18.2563	17.5489	18.3813	18.1821	19.9459	20.1946	19.8802	20.1825	+	LFQ intensity LSD1_LFQ intensity NLS	11	11	11	6	6	6	330.63	0	19.393	63500000	24	4.15516	0.000653992	1.95868	1.62888	Q68DQ2	Q68DQ2	Very large A-kinase anchor protein	CRYBG3	2925
17.9604	17.6319	18.4735	21.0691	21.2593	22.019	21.6364	21.9098	+	LFQ intensity LSD1_LFQ intensity NLS	6	6	6	1.6	1.6	1.6	531.78	0	7.0724	286000000	13	1.97345	0.000649057	2.92241	1.62414	Q15149;E9PMV1;H0YDN1	Q15149	Plectin	PLEC	2672
20.7634	20.5915	21.6364	20.6364	23.2288	22.7655	22.8708	22.9672	+	LFQ intensity LSD1_LFQ intensity NLS	17	17	17	24.7	24.7	24.7	121.98	0	66.088	640000000	104	3.61094	0.000641791	2.0511	1.62126	Q9UQL6;K7EJL6;K7EJL4;K7EJZ7;K7ES01;C9J0X4;C9J481;B7Z3P7;B5MCF1;Q9UKV0;P56524	Q9UQL6	Histone deacetylase 5	HDAC5	4281
19.1382	18.8936	18.3592	19.1778	21.417	21.4066	21.3376	20.1825	+	LFQ intensity LSD1_LFQ intensity NLS	8	7	7	11.8	10.6	10.6	102.28	0	18.08	79000000	15	3.07871	0.000639405	2.19374	1.61818	Q8NI77	Q8NI77	Kinesin-like protein KIF18A	KIF18A	3302
21.7307	21.2185	21.0559	21.7995	23.1426	23.4425	23.3645	23.7594	+	LFQ intensity LSD1_LFQ intensity NLS	34	34	0	16.9	16.9	0	319.1	0	178.22	673000000	145	3.92233	0.000632353	1.97614	1.6137	P50851;H0YA17	P50851	Lipopolysaccharide-responsive and beige-like anchor protein	LRBA	2146
19.8576	20.5261	21.1332	20.8191	22.4825	22.8288	22.5915	22.7013	+	LFQ intensity LSD1_LFQ intensity NLS	28	28	28	23.4	23.4	23.4	227.73	0	102.78	451000000	90	3.48245	0.000627737	2.06703	1.6124	E7ETA6;Q15154;A6NNN6;H0YBA1;E7EV93;E5RGQ4;E9PGW9	E7ETA6;Q15154;A6NNN6	Pericentriolar material 1 protein	PCM1	696
21.8689	22.3936	21.743	21.6497	23.8093	23.8858	23.7796	23.7182	+	LFQ intensity LSD1_LFQ intensity NLS	33	33	33	23.6	23.6	23.6	265.61	0	210.55	1120000000	199	4.49732	0.000623188	1.88439	1.61096	Q9HCK1;N0DVX5	Q9HCK1;N0DVX5	DBF4-type zinc finger-containing protein 2	ZDBF2	3954
20.1825	20.343	18.272	18.9612	22.2448	21.9495	21.8191	21.5069	+	LFQ intensity LSD1_LFQ intensity NLS	10	10	10	22.7	22.7	22.7	79.135	0	20.152	175000000	49	2.47612	0.000616487	2.4404	1.60584	Q9H6R7;C9JYC1	Q9H6R7	WD repeat and coiled-coil-containing protein C2orf44	C2orf44	3893
18.8111	19.647	18.6994	17.9938	20.7955	20.7389	21.0691	21.2707	+	LFQ intensity LSD1_LFQ intensity NLS	8	8	8	5	5	5	311.64	0	14.229	124000000	24	3.03312	0.000614286	2.1807	1.60265	P25054;E9PFT7;B7Z2B6;H3BNH8;R4GMU6	P25054;E9PFT7;B7Z2B6	Adenomatous polyposis coli protein	APC	1876
18.2778	18.4822	19.0343	16.9105	19.2464	21.5165	21.2933	21.7182	+	LFQ intensity LSD1_LFQ intensity NLS	7	7	7	1.3	1.3	1.3	847.96	0	13.886	156000000	11	2.04601	0.000609929	2.76742	1.60081	F8W9J4;Q03001;E7ERU0;E9PHM6;F6QMI7;E9PEB9;Q6P0N6;E7ETB9	F8W9J4;Q03001;E7ERU0;E9PHM6;F6QMI7;E9PEB9	Dystonin	DST	928
17.2119	19.3582	20.417	19.2955	21.7471	21.6627	21.8152	21.7056	+	LFQ intensity LSD1_LFQ intensity NLS	13	13	13	9.3	9.3	9.3	223.69	0	28.321	180000000	25	2.1294	0.000603509	2.66198	1.59243	J3KN16;Q5VYK3;R4GMY1;R4GMY3	J3KN16;Q5VYK3	Proteasome-associated protein ECM29 homolog	KIAA0368;ECM29	1162
20.7471	20.7715	20.3321	20.6364	22.1457	22.3725	22.7553	22.6409	+	LFQ intensity LSD1_LFQ intensity NLS	13	13	13	27.5	27.5	27.5	76.059	0	142.79	387000000	80	4.45495	0.000601399	1.85679	1.58685	D3YTB5;P51617;H7C224;H7C2I6;H7C3C1;F8WAB6;H7C3G8;H7C1F0;F6U4U2;P51955	D3YTB5;P51617;H7C224	Interleukin-1 receptor-associated kinase 1	IRAK1	602
17.4231	18.9358	18.2762	18.6131	19.8315	20.5356	20.7471	21.2066	+	LFQ intensity LSD1_LFQ intensity NLS	11	11	11	13.6	13.6	13.6	122.15	0	22.641	127000000	25	2.70985	0.000597222	2.26815	1.58237	Q9UPN4;I3L2J8;I3L2X7;I3L316;I3L4M5	Q9UPN4;I3L2J8;I3L2X7	Centrosomal protein of 131 kDa	CEP131	4266
19.1079	19.4313	19.9742	20.1581	21.3101	21.4576	22.0054	22.44	+	LFQ intensity LSD1_LFQ intensity NLS	16	16	16	19.1	19.1	19.1	140.53	0	32.77	181000000	38	3.02119	0.000591065	2.13539	1.57589	Q99707;B1ANE3	Q99707;B1ANE3	Methionine synthase	MTR	3660
19.7249	18.1301	19.8757	19.0684	21.3592	21.502	21.0156	22.0756	+	LFQ intensity LSD1_LFQ intensity NLS	7	7	7	33	33	33	36.966	0	39.264	204000000	36	2.62525	0.000589041	2.28832	1.57323	Q06609;E9PNT5;E9PJ30;Q9NZG9;E9PI54	Q06609;E9PNT5	DNA repair protein RAD51 homolog 1	RAD51	2453
24.945	24.4425	24.7796	24.8385	26.6865	26.673	26.3612	26.3545	+	LFQ intensity LSD1_LFQ intensity NLS	35	35	32	55.7	55.7	52.8	97.621	0	323.31	5450000000	507	4.76857	0.00118667	1.76739	1.54642	Q9UBF2;H3BS45;F5H1S1;Q92521	Q9UBF2	Coatomer subunit gamma-2	COPG2	4155
22.8614	22.9153	22.4425	22.8557	24.2961	24.9584	25.2961	24.3511	+	LFQ intensity LSD1_LFQ intensity NLS	39	38	38	35.3	35.3	35.3	152.6	0	323.31	2580000000	422	3.49159	0.00118272	1.95674	1.54574	A6NHB5;Q14202;A6NHN7;A6NL54;A6NC58	A6NHB5;Q14202;A6NHN7	Zinc finger MYM-type protein 3	ZMYM3	361	+
18.2192	18.4765	17.9368	18.0001	20.2419	20.5356	20.0292	19.4972	+	LFQ intensity LSD1_LFQ intensity NLS	6	6	6	10.1	10.1	10.1	100.96	0	43.008	47300000	14	3.58265	0.00117105	1.91784	1.53323	A6NF31;O75665;A0A0A0MS89	A6NF31;O75665;A0A0A0MS89	Oral-facial-digital syndrome 1 protein	OFD1	356
17.7457	19.2476	21.5165	19.0717	20.6364	22.1238	23.5045	24.2891	+	LFQ intensity LSD1_LFQ intensity NLS	8	8	7	48.1	48.1	44.9	34.352	0	24.886	354000000	36	1.5585	0.00131148	3.24307	1.52862	Q12904;D6R937	Q12904	Aminoacyl tRNA synthase complex-interacting multifunctional protein 1;Endothelial monocyte-activating polypeptide 2	AIMP1	2496
17.8655	18.3906	17.2121	18.0974	20.2535	19.3167	19.8469	20.3538	+	LFQ intensity LSD1_LFQ intensity NLS	10	10	1	8.6	8.6	0.5	211.99	0	38.42	73300000	17	3.00138	0.00130719	2.05132	1.52623	H0Y966;A0A0A0MR42;K7ENP4;K7EPA2;C9JT09	H0Y966;A0A0A0MR42;K7ENP4		CEP192	1011
22.2244	22.0054	21.8876	22.0054	23.7895	23.7286	23.6757	23.5404	+	LFQ intensity LSD1_LFQ intensity NLS	17	17	17	29.5	29.5	29.5	81.116	0	114.43	910000000	122	5.83043	0.00128205	1.65287	1.51909	Q5W0B1	Q5W0B1	RING finger protein 219	RNF219	2913
18.6276	17.4134	17.9327	20.2764	20.7634	20.7056	21.2933	21.5498	+	LFQ intensity LSD1_LFQ intensity NLS	6	6	6	14.6	14.6	14.6	78.767	0	35.001	139000000	19	2.06461	0.00127796	2.51551	1.51895	Q8N6R0	Q8N6R0	Methyltransferase-like protein 13	METTL13	3233
18.8378	18.2072	20.1946	18.5218	21.4375	21.9061	21.1457	20.5165	+	LFQ intensity LSD1_LFQ intensity NLS	8	8	8	16.7	16.7	16.7	96.753	0	24.159	117000000	21	2.34019	0.00126582	2.3111	1.51521	Q9ULE6	Q9ULE6	Paladin	PALD1	4238
20.8727	20.3538	21.0088	21.1395	22.6907	23.2477	22.3129	22.743	+	LFQ intensity LSD1_LFQ intensity NLS	20	20	15	36.8	36.8	26	71.407	0	86.302	397000000	75	3.50062	0.00126183	1.9049	1.51438	G3V5R9;G3V3H3;G5E9S8;G3V2E7;F8W6L3;E7EVH7;Q07866;H0YG16;H0YJU9;H0YJL0;H0YJT3;G3V2P7;H7C4M1;E9PQ02;A8MX29;H0YJK1;H0YGB8;K7EL76;Q6P597	G3V5R9;G3V3H3;G5E9S8;G3V2E7;F8W6L3;E7EVH7;Q07866	Kinesin light chain 1	KLC1	970
19.1649	18.9806	17.3458	18.9127	20.4874	20.4476	21.0625	21.3376	+	LFQ intensity LSD1_LFQ intensity NLS	16	16	16	7.4	7.4	7.4	378.03	0	42.719	104000000	17	2.47733	0.00125786	2.23277	1.51352	O95613	O95613	Pericentrin	PCNT	1586
21.3805	21.0426	20.9316	20.2535	22.5285	22.9153	22.8073	22.9316	+	LFQ intensity LSD1_LFQ intensity NLS	14	14	14	38.3	38.3	38.3	63.309	0	155.78	447000000	106	3.52214	0.0013625	1.89363	1.51003	Q9NPI6;A0A087WT55;A0A087WXD0;A0A087WVE6	Q9NPI6	mRNA-decapping enzyme 1A	DCP1A	3977
20.265	18.0084	18.6357	18.1555	20.8113	21.3538	21.002	21.1206	+	LFQ intensity LSD1_LFQ intensity NLS	9	9	9	20	20	20	71.863	0	27.569	146000000	21	2.31863	0.00135826	2.30575	1.50745	Q15025;A0A0A0MRZ4;E7EMV7;H0YC17;E7EW15;E7EWG2;E7EW68	Q15025;A0A0A0MRZ4;E7EMV7	TNFAIP3-interacting protein 1	TNIP1	2657
21.265	20.9388	17.8744	21.4273	24.019	22.7655	22.9864	23.0854	+	LFQ intensity LSD1_LFQ intensity NLS	1	1	1	28	28	28	5.8668	0	14.476	459000000	28	1.73503	0.00135404	2.83773	1.50583	F8VSA6;E9PS38;S4R3E9;E9PL57;Q15843	F8VSA6;E9PS38;S4R3E9;E9PL57;Q15843	NEDD8	NEDD8;NEDD8-MDP1	777
19.4496	19.4624	18.8583	18.0358	20.6453	21.1886	21.1886	20.9672	+	LFQ intensity LSD1_LFQ intensity NLS	8	8	8	15	15	15	108.2	0	19.742	127000000	33	2.89349	0.00134568	2.04589	1.50445	Q9NRA8;B1AKL4;B0QYZ7;B1AKL5;B1AKL6	Q9NRA8;B1AKL4;B0QYZ7	Eukaryotic translation initiation factor 4E transporter	EIF4ENIF1	4000
22.4451	22.3805	23.1886	23.3239	24.7338	24.5522	24.6595	24.9672	+	LFQ intensity LSD1_LFQ intensity NLS	31	31	31	45.3	45.3	45.3	105.84	0	216.86	1390000000	238	3.46065	0.00163692	1.89365	1.50207	Q99460;A0A087WW66;H7C378;C9J9M4;H7BZR6;F8WCE3	Q99460;A0A087WW66	26S proteasome non-ATPase regulatory subunit 1	PSMD1	3641
18.7196	18.6946	19.0708	17.8691	20.6186	20.1825	20.5356	20.6971	+	LFQ intensity LSD1_LFQ intensity NLS	3	3	3	2.2	2.2	2.2	216.04	0	8.2557	77600000	5	3.33397	0.00162691	1.91994	1.50126	Q3V6T2;H0Y470;H7C2C6;H0Y7K3;H0Y7U8;A0A087WXD9	Q3V6T2;H0Y470;H7C2C6	Girdin	CCDC88A	2779
19.2787	19.8742	20.1457	20.4972	21.2477	21.9061	22.6342	22.4247	+	LFQ intensity LSD1_LFQ intensity NLS	17	17	17	6.3	6.3	6.3	530.25	0	99.818	263000000	62	2.70972	0.00162195	2.10426	1.5008	Q9NR09	Q9NR09	Baculoviral IAP repeat-containing protein 6	BIRC6	3993
20.3211	22.0156	20.9812	21.2593	22.4676	23.0789	24.1174	24.1871	+	LFQ intensity LSD1_LFQ intensity NLS	59	59	59	26.1	26.1	26.1	367.76	0	323.31	781000000	152	2.27021	0.00161702	2.31844	1.50037	P49454;A0A087WTY4	P49454	Centromere protein F	CENPF	2112
20.1079	20.3211	19.6204	18.6294	21.68	22.2036	21.6051	21.6096	+	LFQ intensity LSD1_LFQ intensity NLS	11	11	11	38.8	38.8	38.8	47.366	0	39.92	165000000	35	2.70483	0.00161212	2.10489	1.50016	P43686	P43686	26S protease regulatory subunit 6B	PSMC4	2058
19.0722	18.772	18.2606	18.8228	20.2989	20.7223	20.4375	20.5915	+	LFQ intensity LSD1_LFQ intensity NLS	3	3	3	6.2	6.2	6.2	102.2	0	6.2614	54200000	5	4.03221	0.00157864	1.78063	1.49195	Q6ULP2;B8ZZI9	Q6ULP2;B8ZZI9	Aftiphilin	AFTPH	3003
23.0559	22.5309	22.5638	22.2764	24.2891	24.5463	24.2678	24.3101	+	LFQ intensity LSD1_LFQ intensity NLS	13	12	12	28.4	26.8	26.8	78.947	0	62.857	1680000000	156	4.22731	0.00156471	1.74658	1.486	O14641;I3L2W9;I3L2N2;I3L0M7;I3L0Z8	O14641;I3L2W9;I3L2N2;I3L0M7	Segment polarity protein dishevelled homolog DVL-2	DVL2	1315
18.7244	17.8904	18.5341	17.5471	19.7056	20.0691	20.1332	20.7553	+	LFQ intensity LSD1_LFQ intensity NLS	8	8	8	12.1	12.1	12.1	99.289	0	26.616	74700000	18	2.89148	0.00152436	1.99181	1.47465	Q15276;I3L456	Q15276	Rab GTPase-binding effector protein 1	RABEP1	2678
20.0292	19.9229	20.0559	19.4815	21.6006	21.7915	21.4476	21.4425	+	LFQ intensity LSD1_LFQ intensity NLS	7	7	7	10.8	10.8	10.8	103.77	0	120.92	190000000	41	4.43619	0.00152	1.6982	1.46807	J3KNZ9;Q9HAH7;H3BRE6	J3KNZ9;Q9HAH7	Probable fibrosin-1	FBRS	1173
20.4775	18.3366	16.8402	18.4019	20.6096	20.9316	21.2989	21.6757	+	LFQ intensity LSD1_LFQ intensity NLS	18	18	18	5.8	5.8	5.8	510.08	0	79.414	186000000	30	1.80872	0.00151136	2.61491	1.46743	O75592;H7C3U4;A0A0C4DGY7	O75592	E3 ubiquitin-protein ligase MYCBP2	MYCBP2	1508
27.6998	27.6595	27.5754	27.7129	29.326	29.3494	29.0111	29.3494	+	LFQ intensity LSD1_LFQ intensity NLS	35	35	23	65.8	65.8	40.4	70.051	0	323.31	34700000000	834	5.73178	0.00150708	1.59708	1.46732	P0DMV9;P0DMV8;V9GZ37	P0DMV9;P0DMV8;V9GZ37	Heat shock 70 kDa protein 1B;Heat shock 70 kDa protein 1A	HSPA1B;HSPA1A	1716
17.9519	20.1825	20.343	17.9689	21.5915	21.2989	21.823	21.5498	+	LFQ intensity LSD1_LFQ intensity NLS	8	8	8	8.9	8.9	8.9	146.56	0	21.495	172000000	18	1.96569	0.00149859	2.45423	1.46604	O60343;Q5JU47	O60343	TBC1 domain family member 4	TBC1D4	1435
20.2419	19.9882	19.7273	20.2764	21.5309	21.8346	21.8423	21.7471	+	LFQ intensity LSD1_LFQ intensity NLS	17	17	17	14.6	14.6	14.6	251.89	0	51.992	244000000	60	4.57215	0.00149438	1.68029	1.46508	J3KNL6;O15027;F1T0I1;A0A0C4DH09;X6RGP5;Q8N9G1	J3KNL6;O15027;F1T0I1	Protein transport protein Sec16A	SEC16A	1167
25.7338	25.8552	25.3844	25.6703	27.3662	27.4785	27.141	27.1984	+	LFQ intensity LSD1_LFQ intensity NLS	126	126	85	55.5	55.5	39.6	358.2	0	323.31	11800000000	1599	4.88404	0.00161326	1.63508	1.45175	P49792;F8WBP7	P49792	E3 SUMO-protein ligase RanBP2	RANBP2	2126
22.3376	22.0886	21.7634	21.7471	23.4425	23.7182	23.6649	23.8764	+	LFQ intensity LSD1_LFQ intensity NLS	23	23	1	23.9	23.9	1.2	164.98	0	323.31	773000000	157	4.259	0.0016044	1.69132	1.44848	Q14C86;C9IZ08;B4DGD8;H0Y7I9;A0A0A0MQV8	Q14C86;C9IZ08;B4DGD8;H0Y7I9	GTPase-activating protein and VPS9 domain-containing protein 1	GAPVD1	2646
19.4046	19.3123	18.1307	18.6168	20.265	21.0951	21.1642	20.8113	+	LFQ intensity LSD1_LFQ intensity NLS	18	18	18	25.6	25.6	25.6	109.7	0	62.163	276000000	79	2.77887	0.0017377	1.96779	1.44223	Q96QT6;C9J9G2;K7EPF7;K7ERZ4;K7EJN7;K7ENU0;K7EJ43	Q96QT6;C9J9G2	PHD finger protein 12	PHF12	3603
18.484	18.298	18.5968	18.963	20.0821	20.0821	20.6886	20.417	+	LFQ intensity LSD1_LFQ intensity NLS	7	7	7	6.5	6.5	6.5	196.71	0	12.416	78800000	23	3.84872	0.00172826	1.73202	1.43988	Q9BY89	Q9BY89	Uncharacterized protein KIAA1671	KIAA1671	3777
18.0307	19.9742	17.1673	18.2537	20.6364	20.6714	20.6886	20.5638	+	LFQ intensity LSD1_LFQ intensity NLS	14	13	13	10.1	9.7	9.7	236.6	0	25.826	136000000	17	2.08768	0.00172358	2.28357	1.4375	Q86YA3;G3XAL8;I3L0G6	Q86YA3;G3XAL8	Protein ZGRF1	ZGRF1	3137
17.7192	18.9028	18.6538	18.406	20.2185	20.1457	20.0821	20.5823	+	LFQ intensity LSD1_LFQ intensity NLS	6	6	6	6.1	6.1	6.1	165.95	0	25.674	73800000	15	3.23522	0.00171892	1.83667	1.43681	O43379;H7C3R4	O43379	WD repeat-containing protein 62	WDR62	1391
20.4874	20.3211	19.4108	19.7504	22.019	21.8113	21.5404	21.8307	+	LFQ intensity LSD1_LFQ intensity NLS	13	13	13	31.8	31.8	31.8	72.123	0	42.861	220000000	50	3.28035	0.00169149	1.80792	1.42503	Q9H7D7;H0Y9R3;C9JCS7;H0Y917	Q9H7D7;H0Y9R3	WD repeat-containing protein 26	WDR26	3902
21.2821	21.1332	19.9214	20.7876	22.5846	22.7286	22.44	22.8858	+	LFQ intensity LSD1_LFQ intensity NLS	26	24	24	15	14	14	293.51	0	69.185	518000000	142	2.97089	0.00182493	1.87868	1.42395	Q9UMN6	Q9UMN6	Histone-lysine N-methyltransferase 2B	KMT2B	4252
19.4273	18.0597	18.5186	19.5108	21.0625	21.3699	20.4676	20.6276	+	LFQ intensity LSD1_LFQ intensity NLS	10	8	8	19.8	16.9	16.9	85.075	0	23.428	117000000	19	2.56523	0.00181053	2.00282	1.42139	E7ER32;A0A087X287;W0Z7M9;Q969V6;B0QY83;A0A087WU73	E7ER32;A0A087X287;W0Z7M9;Q969V6;B0QY83;A0A087WU73	MKL/myocardin-like protein 1	MKL1;mkl1	163
22.002	21.6497	21.7056	22.1015	23.2961	23.391	23.5638	23.654	+	LFQ intensity LSD1_LFQ intensity NLS	30	30	29	21.2	21.2	20.4	242.56	0	122.4	733000000	158	4.64099	0.00193717	1.61158	1.41731	Q96N67;A0A0C4DGY6;H0Y7L2;A2A369;Q96HP0	Q96N67;A0A0C4DGY6	Dedicator of cytokinesis protein 7	DOCK7	3588
23.632	23.8191	22.5731	22.5961	25.3307	25.4425	25.3443	24.4488	+	LFQ intensity LSD1_LFQ intensity NLS	42	42	35	65.9	65.9	56.2	88.336	0	323.31	7610000000	481	2.56986	0.00208333	1.98655	1.41406	Q96JM7;E9PLL7	Q96JM7	Lethal(3)malignant brain tumor-like protein 3	L3MBTL3	3564	+
17.5451	17.4501	18.438	18.7808	21.6409	21.1886	21.5165	18.3318	+	LFQ intensity LSD1_LFQ intensity NLS	3	3	3	3.4	3.4	3.4	137.33	0	17.134	134000000	4	1.66048	0.00207792	2.61594	1.41309	Q9Y4H2	Q9Y4H2	Insulin receptor substrate 2	IRS2	4348
17.8428	18.4409	19.7857	19.4323	20.8727	21.0886	20.6096	21.1457	+	LFQ intensity LSD1_LFQ intensity NLS	6	6	6	14.5	14.5	14.5	88.761	0	9.5928	111000000	9	2.35735	0.00230928	2.05375	1.40388	H3BND4;Q6P996;Q86XE2;J3KNK7;Q6P474	H3BND4;Q6P996;Q86XE2	Pyridoxal-dependent decarboxylase domain-containing protein 1	PDXDC1	1075
20.7056	20.3645	19.6347	17.2797	21.9316	22.1143	22.1174	21.7876	+	LFQ intensity LSD1_LFQ intensity NLS	13	13	12	13.2	13.2	12.4	185.19	0	51.253	242000000	70	1.73656	0.00230334	2.4916	1.40298	E9PCH4;Q8TEU7;A0A0A6YYB7;A0A0A0MR23;D6RE77;B7Z7Y1;A0A0A6YYJ1	E9PCH4;Q8TEU7;A0A0A6YYB7;A0A0A0MR23;D6RE77;B7Z7Y1	Rap guanine nucleotide exchange factor 6	RAPGEF6	731
20.9098	21.3376	19.9742	20.2877	21.9098	22.6253	23.002	22.7056	+	LFQ intensity LSD1_LFQ intensity NLS	28	28	28	38.4	38.4	38.4	137.53	0	112.2	826000000	164	2.62528	0.00238168	1.93334	1.3969	Q92610;H0YM74	Q92610;H0YM74	Zinc finger protein 592	ZNF592	3404
19.3709	18.1447	18.803	18.5749	20.6886	20.2302	20.714	20.4066	+	LFQ intensity LSD1_LFQ intensity NLS	9	9	9	12.1	12.1	12.1	139.99	0	17.981	115000000	23	3.15156	0.00237563	1.78646	1.39499	P78312;E7EUR8;D6RFZ4	P78312;E7EUR8	Protein FAM193A	FAM193A	2363
17.9902	18.4553	17.4001	18.6769	20.5165	19.3879	20.2066	20.0426	+	LFQ intensity LSD1_LFQ intensity NLS	5	5	5	15.1	15.1	15.1	61.24	0	11.125	54600000	15	2.68084	0.00236364	1.90774	1.39314	Q8IX15;U3KPW8	Q8IX15;U3KPW8	Homeobox and leucine zipper protein Homez	HOMEZ	3169
17.8211	17.6507	18.3192	19.8547	19.8591	20.6971	20.9388	20.8269	+	LFQ intensity LSD1_LFQ intensity NLS	5	5	5	13.1	13.1	13.1	68.833	0	22.756	82000000	20	2.08989	0.00235768	2.16903	1.39182	Q9UJX2	Q9UJX2	Cell division cycle protein 23 homolog	CDC23	4209	+
20.265	19.3667	19.6435	19.7307	21.0756	21.4972	21.4221	22.0724	+	LFQ intensity LSD1_LFQ intensity NLS	10	10	10	17.3	17.3	17.3	93.908	0	29.76	166000000	39	3.13459	0.00231683	1.76536	1.37988	Q658Y4;E7ER68;G3V120;H0YBR6;H0YC80	Q658Y4;E7ER68	Protein FAM91A1	FAM91A1	2918
18.9714	20.343	19.6869	20.4676	21.8987	21.8269	21.5823	21.6096	+	LFQ intensity LSD1_LFQ intensity NLS	23	23	16	9.1	9.1	6.6	394.46	0	125.42	287000000	75	2.7268	0.00229975	1.86217	1.37624	P46939;H0Y337	P46939	Utrophin	UTRN	2080
20.0156	19.9882	19.4273	20.4775	21.6231	21.9985	21.2764	22.0359	+	LFQ intensity LSD1_LFQ intensity NLS	9	9	9	32	32	32	45.209	0	178.88	177000000	76	3.12193	0.00227737	1.75633	1.37272	A6NKD9;H0YJE0;G3V5D5;G3V2D7;H0YJY5;G3V4C8	A6NKD9	Coiled-coil domain-containing protein 85C	CCDC85C	368
21.2302	20.895	20.8499	20.8576	22.6865	22.4726	22.4298	22.3511	+	LFQ intensity LSD1_LFQ intensity NLS	12	12	12	47.6	47.6	47.6	46.359	0	80.569	324000000	88	4.92491	0.00226634	1.52679	1.36806	Q8IX90;F5GWG1;F5H8H7	Q8IX90	Spindle and kinetochore-associated protein 3	SKA3	3172
17.4122	21.6627	18.44	18.8818	22.3101	21.9742	21.7836	20.9531	+	LFQ intensity LSD1_LFQ intensity NLS	6	6	6	21.8	21.8	21.8	45.581	0	10.199	263000000	17	1.49884	0.00225	2.65603	1.35994	Q96BU1;E9PSA0;E9PIY5;E9PMK1;E9PL86;E9PIZ7	Q96BU1;E9PSA0	S100P-binding protein	S100PBP	3479
21.6928	21.4825	21.2821	18.4636	23.0258	23.0724	22.9985	23.3645	+	LFQ intensity LSD1_LFQ intensity NLS	22	22	22	30.5	30.5	30.5	97.34	0	81.246	697000000	90	1.6855	0.0023658	2.38504	1.35141	Q92667;I3L0W0;I3L2A2;I3L2N7;I3L0K6;I3L364;I3L3K1;I3NI36	Q92667	A-kinase anchor protein 1, mitochondrial	AKAP1	3414
18.1302	20.1206	18.843	19.1815	21.1015	21.002	20.8034	21.0156	+	LFQ intensity LSD1_LFQ intensity NLS	12	12	12	14.7	14.7	14.7	142.83	0	37.293	137000000	34	2.41974	0.00250353	1.9118	1.34805	Q96PY6;H0Y8M6	Q96PY6	Serine/threonine-protein kinase Nek1	NEK1	3598
20.5261	20.6096	20.4476	19.3193	21.7098	22.0918	21.8839	22.3403	+	LFQ intensity LSD1_LFQ intensity NLS	10	9	9	17.3	16.3	16.3	98.38	0	23.945	277000000	51	2.7577	0.00262326	1.7808	1.33598	E7ESP9;P07197;E7EMV2	E7ESP9;P07197;E7EMV2	Neurofilament medium polypeptide	NEFM	693
18.7133	18.1466	18.8062	18.8825	20.8269	20.9388	21.0691	19.3551	+	LFQ intensity LSD1_LFQ intensity NLS	5	5	5	9.1	9.1	9.1	122.57	0	14.415	135000000	12	2.34095	0.0025931	1.91026	1.33212	Q8WVS4;H7C022	Q8WVS4;H7C022	WD repeat-containing protein 60	WDR60	3367
18.1612	18.9407	17.7058	18.4507	19.5802	20.2764	20.1703	20.1703	+	LFQ intensity LSD1_LFQ intensity NLS	8	8	8	14.8	14.8	14.8	113.42	0	17.341	62700000	12	2.90543	0.00258716	1.73473	1.33078	O43303;I3L262	O43303	Centriolar coiled-coil protein of 110 kDa	CCP110	1387
25.8528	25.1055	25.5609	25.6513	26.9869	27.1312	26.9428	27.3992	+	LFQ intensity LSD1_LFQ intensity NLS	100	100	82	48.6	48.6	40.4	226.53	0	323.31	8680000000	1193	3.79214	0.00255782	1.57238	1.32296	P35579;Q5BKV1;B1AH99;E7ERA5	P35579	Myosin-9	MYH9	1982
19.9601	20.1581	19.5242	17.9516	22.0821	20.8499	22.2535	20.9024	+	LFQ intensity LSD1_LFQ intensity NLS	5	5	5	40.2	40.2	40.2	22.882	0	14.181	125000000	11	1.83774	0.00273731	2.1235	1.30684	Q8N5W9	Q8N5W9	Filamin-interacting protein FAM101B	FAM101B	3229
23.6096	23.6096	23.3376	23.7995	24.9672	25.0443	24.945	25.1757	+	LFQ intensity LSD1_LFQ intensity NLS	25	25	25	48.5	48.5	48.5	71.45	0	173.52	2140000000	315	4.95651	0.0027193	1.44397	1.30279	Q9Y5K6	Q9Y5K6	CD2-associated protein	CD2AP	4364
22.6627	22.5189	21.8423	22.0526	23.7077	24.1795	23.654	23.9134	+	LFQ intensity LSD1_LFQ intensity NLS	21	21	21	69.6	69.6	69.6	61.594	0	134.81	911000000	186	3.38405	0.00271335	1.59451	1.2998	O95817;C9JFK9	O95817	BAG family molecular chaperone regulator 3	BAG3	1603
17.9249	18.8936	18.5315	18.8579	20.3857	19.9601	20.0292	20.2989	+	LFQ intensity LSD1_LFQ intensity NLS	9	9	9	9.8	9.8	9.8	136.92	0	20.408	88000000	28	3.21764	0.00270153	1.61655	1.29656	Q9NSV4	Q9NSV4	Protein diaphanous homolog 3	DIAPH3	4021
21.4874	21.4676	21.0493	20.9459	22.821	22.9424	22.8932	22.4273	+	LFQ intensity LSD1_LFQ intensity NLS	21	21	21	33	33	33	118.56	0	133.53	722000000	125	3.80676	0.00269565	1.53341	1.29647	Q63HK5	Q63HK5	Teashirt homolog 3	TSHZ3	2916
18.3	19.7389	18.0235	18.4299	20.343	20.9531	20.4476	20.1079	+	LFQ intensity LSD1_LFQ intensity NLS	8	8	8	13.2	13.2	13.2	101.34	0	36.166	86400000	9	2.32604	0.00268398	1.83978	1.29469	Q6ZNB6	Q6ZNB6	NF-X1-type zinc finger protein NFXL1	NFXL1	3019
19.1078	17.4656	18.1894	18.2633	20.5451	20.4273	19.7257	19.6276	+	LFQ intensity LSD1_LFQ intensity NLS	13	3	3	16.3	3.7	3.7	127.72	0	20.819	59100000	24	2.36163	0.00267241	1.82486	1.2938	Q96HA1	Q96HA1	Nuclear envelope pore membrane protein POM 121	POM121	3542
17.3002	18.3744	18.1722	17.9208	19.2877	19.3815	19.6276	20.5545	+	LFQ intensity LSD1_LFQ intensity NLS	4	4	4	18.8	18.8	18.8	46.105	0	8.3423	106000000	30	2.50655	0.00266094	1.77093	1.29098	P32121;I3L412;Q68DZ5;K7ENA6;K7EL17	P32121;I3L412;Q68DZ5;K7ENA6	Beta-arrestin-2	ARRB2;DKFZp686L0365	1953
19.6293	20.0559	18.8345	19.7157	20.8651	21.4273	21.3592	21.2185	+	LFQ intensity LSD1_LFQ intensity NLS	9	9	9	18.6	18.6	18.6	80.049	0	22.11	181000000	42	2.9294	0.00264957	1.65866	1.28862	A0A0C4DGG3;Q8NHM5	A0A0C4DGG3;Q8NHM5	Lysine-specific demethylase 2B	KDM2B	296
20.9316	21.1642	19.724	20.6186	22.4324	22.2477	22.3017	22.2302	+	LFQ intensity LSD1_LFQ intensity NLS	18	18	18	21	21	21	141.52	0	90.603	453000000	136	2.74148	0.00273191	1.6934	1.28391	Q9UHF7;E5RFF3;E5RJ97;H0YC29;H0YAV4;C9J6L7;E7EVN4;F8W8T0	Q9UHF7;E5RFF3;E5RJ97;H0YC29	Zinc finger transcription factor Trps1	TRPS1	4189
18.9882	19.1994	18.9937	19.8469	20.9951	21.002	20.7634	20.5638	+	LFQ intensity LSD1_LFQ intensity NLS	26	26	26	10.2	10.2	10.2	404.23	0	74.133	222000000	48	3.33833	0.00270886	1.57404	1.28157	Q70CQ2;A0A0C4DG73;H7C183;H7C150	Q70CQ2	Ubiquitin carboxyl-terminal hydrolase 34	USP34	3029
17.9272	17.0761	18.7728	17.5381	19.4676	19.3233	19.3921	20.8113	+	LFQ intensity LSD1_LFQ intensity NLS	4	4	4	20.6	20.6	20.6	35.431	0	5.3958	48300000	8	2.04589	0.00293724	1.92001	1.27521	Q6P2C8	Q6P2C8	Mediator of RNA polymerase II transcription subunit 27	MED27	2976
20.4375	19.0668	20.2535	20.3962	21.7715	21.7512	21.4874	21.9882	+	LFQ intensity LSD1_LFQ intensity NLS	13	13	13	21.5	21.5	21.5	119.54	0	69.936	209000000	54	2.61172	0.00293111	1.71107	1.275	O60566;H0YN44	O60566	Mitotic checkpoint serine/threonine-protein kinase BUB1 beta	BUB1B	1443
20.4972	20.6627	20.4476	20.1581	22.1079	21.6186	21.9637	21.9061	+	LFQ intensity LSD1_LFQ intensity NLS	9	9	9	23.5	23.5	23.5	71.648	0	23.243	312000000	60	4.21832	0.00302703	1.45768	1.27099	Q9ULX6;V9GZ50;M0R1Y5;M0QYT7;M0R010	Q9ULX6	A-kinase anchor protein 8-like	AKAP8L	4251
21.68	21.4476	21.8913	21.743	22.9864	23.0756	23.0559	23.2961	+	LFQ intensity LSD1_LFQ intensity NLS	14	14	13	35.9	35.9	32.3	57.255	0	146.07	529000000	87	4.77285	0.00313872	1.41302	1.26837	Q12800;F8VWL0;F8VX55;Q9NZI6	Q12800;F8VWL0;F8VX55	Alpha-globin transcription factor CP2	TFCP2	2484
23.0526	22.8557	23.2535	23.1222	24.5225	24.3645	24.391	24.5463	+	LFQ intensity LSD1_LFQ intensity NLS	53	53	49	18.2	18.2	17.2	481.89	0	278.23	1380000000	309	5.19088	0.00312577	1.3851	1.26519	Q7Z6Z7;H0Y659;Q5H963;A0A087X146	Q7Z6Z7	E3 ubiquitin-protein ligase HUWE1	HUWE1	3086
21.9531	21.3962	22.5777	21.4375	23.1961	23.2678	23.8481	23.7286	+	LFQ intensity LSD1_LFQ intensity NLS	41	41	41	21.7	21.7	21.7	331.77	0	264.8	779000000	183	2.69667	0.00319342	1.66903	1.26362	P15924	P15924	Desmoplakin	DSP	1785
20.5638	20.4375	19.3624	20.3857	21.8764	22.0724	21.928	21.4375	+	LFQ intensity LSD1_LFQ intensity NLS	20	20	20	16.1	16.1	16.1	212.71	0	90.693	233000000	68	2.73939	0.00336842	1.64119	1.25339	R4GNB2;R4GN35;Q5VZ89;X6RAE7;X6R5W5;A0A0A0MRX3;R4GMN2	R4GNB2;R4GN35;Q5VZ89	DENN domain-containing protein 4C	DENND4C	4401
19.5261	19.6818	20.9742	19.9882	21.5498	21.4576	21.8034	22.2036	+	LFQ intensity LSD1_LFQ intensity NLS	8	8	8	18.2	18.2	18.2	69.223	0	27.202	196000000	42	2.47043	0.00336162	1.71106	1.25318	O76031	O76031	ATP-dependent Clp protease ATP-binding subunit clpX-like, mitochondrial	CLPX	1533
17.6037	18.0271	17.5047	16.7165	19.4252	18.1756	19.9742	19.6954	+	LFQ intensity LSD1_LFQ intensity NLS	4	4	4	13	13	13	71.078	0	6.3387	47200000	9	2.07193	0.00335484	1.85463	1.25152	Q8NEC7;D6R9W2;D6RCC4;D6RCC9	Q8NEC7;D6R9W2	Glutathione S-transferase C-terminal domain-containing protein	GSTCD	3277	+
18.1968	17.721	18.621	19.298	20.2764	19.8591	20.1581	20.2989	+	LFQ intensity LSD1_LFQ intensity NLS	4	4	3	7.6	7.6	6.2	76.797	0	4.8098	69200000	8	2.53681	0.00334809	1.68894	1.25148	E9PEI4;H0YB16;H0YBZ1;H0YBP1;E7ESA6;Q05397;B4DWJ1;E5RI03;E5RJQ2;E5RG80	E9PEI4;H0YB16;H0YBZ1;H0YBP1;E7ESA6;Q05397;B4DWJ1	Focal adhesion kinase 1	PTK2	689
18.5955	20.7307	20.8113	17.903	22.1519	21.9171	21.4324	21.3376	+	LFQ intensity LSD1_LFQ intensity NLS	11	11	11	38.3	38.3	38.3	40.836	0	31.513	295000000	51	1.54542	0.003432	2.19964	1.24497	A0A087WXC5;E7ESZ7;O95299;Q8N1B9;C9J6X0;H7C2W5;H7C1Y7;H7C2X4	A0A087WXC5;E7ESZ7;O95299	NADH dehydrogenase [ubiquinone] 1 alpha subcomplex subunit 10, mitochondrial	NDUFA10	90
18.5528	19.3012	17.9607	19.9742	21.9531	19.7971	21.2989	20.8576	+	LFQ intensity LSD1_LFQ intensity NLS	8	8	8	11.2	11.2	11.2	137.75	0	19.885	102000000	32	1.74054	0.00341833	2.02945	1.24462	Q15477;H7C5N0;H7C4L3;B4E0B4	Q15477	Helicase SKI2W	SKIV2L	2696
17.7693	19.6204	18.3762	17.9707	20.4972	19.6869	20.4676	20.3321	+	LFQ intensity LSD1_LFQ intensity NLS	5	5	5	25.2	25.2	25.2	34.551	0	7.1502	72900000	11	2.13259	0.00341153	1.81177	1.24401	Q8TDX7;F8WAG2;Q5TBH0;Q5TBG1;Q5TBG7;Q5TBH2;Q5TBH1;Q9HC98;C9J1H8;F5H3U7	Q8TDX7	Serine/threonine-protein kinase Nek7	NEK7	3330
21.8307	21.8385	21.1703	21.6276	22.9812	23.0821	22.9985	23.1612	+	LFQ intensity LSD1_LFQ intensity NLS	23	23	23	23.9	23.9	23.9	194	0	285.3	600000000	195	3.94538	0.00345988	1.43897	1.23834	Q9UPQ9;H0Y720	Q9UPQ9;H0Y720	Trinucleotide repeat-containing gene 6B protein	TNRC6B	4269
21.4118	20.8034	21.9424	21.5961	22.8839	22.9079	22.8839	23.3239	+	LFQ intensity LSD1_LFQ intensity NLS	26	26	26	26.2	26.2	26.2	191.48	0	199.32	409000000	102	3.00132	0.00344639	1.56149	1.23742	Q02952	Q02952	A-kinase anchor protein 12	AKAP12	2429
20.9243	21.3857	21.3752	19.9054	22.538	22.48	22.5915	22.6584	+	LFQ intensity LSD1_LFQ intensity NLS	19	19	19	12.6	12.6	12.6	276.9	0	90.483	438000000	73	2.50994	0.00343969	1.66932	1.23665	Q12923	Q12923	Tyrosine-protein phosphatase non-receptor type 13	PTPN13	2498
20.5261	20.6364	19.6417	20.1946	21.6671	21.7307	21.928	21.7265	+	LFQ intensity LSD1_LFQ intensity NLS	16	16	2	27.6	27.6	3.5	110.67	0	32.998	281000000	55	3.22336	0.00369171	1.51333	1.22987	Q6ZRI6	Q6ZRI6	Uncharacterized protein C15orf39	C15orf39	3020
18.2032	18.7268	19.5074	19.252	21.417	19.2883	21.4273	21.4825	+	LFQ intensity LSD1_LFQ intensity NLS	4	3	3	14	11.2	11.2	48.897	0	3.8748	113000000	5	1.75227	0.00367754	1.98142	1.22949	Q9UN37;I3L4J1	Q9UN37;I3L4J1	Vacuolar protein sorting-associated protein 4A	VPS4A	4256
24.8481	25.0608	24.8142	24.9134	26.3393	26.2077	26.4073	26.0484	+	LFQ intensity LSD1_LFQ intensity NLS	93	93	93	51.3	51.3	51.3	265.39	0	323.31	6220000000	971	5.07357	0.00364952	1.34154	1.22388	Q8NG31;E9PPJ1;H0YCZ2;H0YEY7;H0YN41	Q8NG31;E9PPJ1;H0YCZ2	Protein CASC5	CASC5	3295
20.8191	21.1642	19.9742	19.7569	22.3294	22.0156	21.9243	22.0326	+	LFQ intensity LSD1_LFQ intensity NLS	30	20	20	16.4	13	13	305.41	0	247.07	259000000	79	2.49939	0.00373435	1.64685	1.22271	Q8TD26;C9JFU2;H7C294	Q8TD26	Chromodomain-helicase-DNA-binding protein 6	CHD6	3325
23.1395	23.3239	22.5731	23.1871	24.5522	24.4551	24.48	24.4425	+	LFQ intensity LSD1_LFQ intensity NLS	71	71	71	33.2	33.2	33.2	384.22	0	323.31	1570000000	326	3.84445	0.00372727	1.42657	1.222	P51587	P51587	Breast cancer type 2 susceptibility protein	BRCA2	2164
24.8044	25.1871	24.8044	24.6865	26.2891	26.0772	26.239	26.3612	+	LFQ intensity LSD1_LFQ intensity NLS	32	32	32	53.9	53.9	53.9	70.171	0	323.31	5300000000	510	4.4744	0.00370621	1.37106	1.21911	Q96EA4;H0YBG5;D6RC83;D6RIF7;D6RIB8;D6R936;D6REZ1;D6RCL1;D6RDK5	Q96EA4	Protein Spindly	SPDL1	3505
20.343	20.1457	20.0156	20.8191	21.6928	21.5545	22.0756	21.895	+	LFQ intensity LSD1_LFQ intensity NLS	7	7	7	14.7	14.7	14.7	66.432	0	28.197	215000000	33	3.37981	0.00392481	1.47365	1.21796	X6RLT1;H0UI80;Q8IXH7	X6RLT1;H0UI80;Q8IXH7	Negative elongation factor C/D	NELFCD;TH1L	987
17.3836	17.6967	18.2035	17.6453	19.6523	19.4435	18.5842	19.5526	+	LFQ intensity LSD1_LFQ intensity NLS	4	4	4	13	13	13	49.669	0	24.416	22600000	7	2.72501	0.00389552	1.57587	1.21311	O95396	O95396	Adenylyltransferase and sulfurtransferase MOCS3;Molybdopterin-synthase adenylyltransferase;Molybdopterin-synthase sulfurtransferase	MOCS3	1575
18.2181	18.7511	18.3628	18.1078	21.1269	20.4576	18.6928	20.6971	+	LFQ intensity LSD1_LFQ intensity NLS	8	8	8	37.2	37.2	37.2	31.274	0	22.129	78600000	29	1.84118	0.00388827	1.88366	1.2127	Q6ZTW0	Q6ZTW0	Tubulin polyglutamylase complex subunit 1	TPGS1	3023
21.6364	20.7796	20.2989	20.5451	22.5961	22.1111	22.4849	22.4093	+	LFQ intensity LSD1_LFQ intensity NLS	15	15	13	35.1	35.1	32.4	75.186	0	111.55	628000000	101	2.66766	0.00388104	1.58532	1.21126	O14640;A0A087WWA7;P54792	O14640;A0A087WWA7;P54792	Segment polarity protein dishevelled homolog DVL-1;Putative segment polarity protein dishevelled homolog DVL1P1	DVL1;DVL1P1	1314
24.3645	25.5492	25.5344	25.1055	26.0833	27.1115	27.0505	26.8858	+	LFQ intensity LSD1_LFQ intensity NLS	171	171	171	56.4	56.4	56.4	629.09	0	323.31	7420000000	1258	2.38497	0.00426568	1.64435	1.20401	Q09666;E9PJZ0;E9PKR9;E9PJC6;E9PLK4;E9PQE3	Q09666	Neuroblast differentiation-associated protein AHNAK	AHNAK	2473
17.8423	18.5951	18.6453	18.078	19.6006	19.901	19.4835	20.2302	+	LFQ intensity LSD1_LFQ intensity NLS	10	10	10	29.4	29.4	29.4	56.051	0	28.311	239000000	44	2.96306	0.00425	1.51364	1.20304	Q6SPF0;E9PIW9;F8WDT5	Q6SPF0;E9PIW9	Atherin	SAMD1	2999
21.3805	21.654	21.1703	21.654	22.6779	22.7995	22.9098	22.9024	+	LFQ intensity LSD1_LFQ intensity NLS	25	25	25	27.7	27.7	27.7	181.79	0	228.78	496000000	129	4.35673	0.0042422	1.35766	1.20213	Q9C0C2;E9PKK0;E9PKE7	Q9C0C2	182 kDa tankyrase-1-binding protein	TNKS1BP1	3805
21.2006	20.7876	20.0156	20.1825	21.7915	22.4298	21.8538	22.4996	+	LFQ intensity LSD1_LFQ intensity NLS	12	12	12	32.2	32.2	32.2	96.723	0	105.41	434000000	61	2.53216	0.00444689	1.5971	1.19968	Q9UPN7	Q9UPN7	Serine/threonine-protein phosphatase 6 regulatory subunit 1	PPP6R1	4267
20.7715	21.4118	19.6293	20.1581	22.5685	22.2678	21.7594	22.1856	+	LFQ intensity LSD1_LFQ intensity NLS	9	1	1	17.6	3.9	3.9	44.348	0	16.816	196000000	40	2.17519	0.00443066	1.70263	1.19922	Q58FF8	Q58FF8	Putative heat shock protein HSP 90-beta 2	HSP90AB2P	2804
20.7876	20.9024	22.5685	21.9243	23.0526	22.8708	23.5869	23.7389	+	LFQ intensity LSD1_LFQ intensity NLS	12	12	12	35.4	35.4	35.4	48.55	0	45.774	570000000	74	2.00945	0.00441455	1.76661	1.19839	Q15645;H0YAL2	Q15645	Pachytene checkpoint protein 2 homolog	TRIP13	2707
21.1015	21.0951	20.002	20.417	22.3403	22.155	22.002	22.2361	+	LFQ intensity LSD1_LFQ intensity NLS	19	19	19	27.1	27.1	27.1	136.86	0	318.97	260000000	96	2.80855	0.00472595	1.52945	1.19538	F8W7U3;E7ESD2;Q5SNT6;Q641Q2;A0A087WYF6;A0A0A0MR88;A0A096LPC5;J3KP36;Q9Y4E1;A0A0A0MT65;Q5SRD0;B1AP61	F8W7U3;E7ESD2;Q5SNT6;Q641Q2;A0A087WYF6;A0A0A0MR88;A0A096LPC5;J3KP36;Q9Y4E1	WASH complex subunit FAM21B;WASH complex subunit FAM21A;WASH complex subunit FAM21C	FAM21A;FAM21B;FAM21C	690
20.4476	20.9812	17.7134	18.4003	21.5356	21.0691	21.4726	22.1426	+	LFQ intensity LSD1_LFQ intensity NLS	6	6	5	21.5	21.5	19.2	39.31	0	12.605	193000000	22	1.42107	0.00470036	2.16934	1.19326	Q96GD4;J3KTD6;J3KT86;J3KRJ2;J3KRF8;J3QR41;J3QLN8;B4DXA6;A0A0A0MSY3;Q5Y191;Q9UQB9	Q96GD4;J3KTD6;J3KT86;J3KRJ2;J3KRF8;J3QR41;J3QLN8	Aurora kinase B	AURKB	3532
20.6276	21.2302	21.4676	21.0559	22.2066	22.6453	22.4874	22.9006	+	LFQ intensity LSD1_LFQ intensity NLS	31	31	31	19.2	19.2	19.2	251.46	0	75.883	516000000	107	3.15993	0.00468345	1.46462	1.19149	Q8N3C0;E5RFZ0;J3KNJ4	Q8N3C0	Activating signal cointegrator 1 complex subunit 3	ASCC3	3215
19.7157	19.1282	19.3145	19.6575	20.9171	20.9672	21.0951	20.4972	+	LFQ intensity LSD1_LFQ intensity NLS	8	6	6	19.9	16.7	16.7	73.051	0	24.815	103000000	31	3.51031	0.00465832	1.41516	1.18841	P04049;H7C155;H7C560;P15056;A0A0B4J1W9	P04049;H7C155	RAF proto-oncogene serine/threonine-protein kinase	RAF1	1642
21.9352	22.1363	21.5869	21.68	23.1825	23.0359	23.1642	23.4041	+	LFQ intensity LSD1_LFQ intensity NLS	20	20	20	35.2	35.2	35.2	71.639	0	120.36	591000000	102	4.06242	0.00475714	1.36207	1.18833	A0MZ66	A0MZ66	Shootin-1	KIAA1598	337
18.9232	18.2909	19.3806	19.6435	20.417	20.5823	20.5165	20.9882	+	LFQ intensity LSD1_LFQ intensity NLS	4	4	4	10.1	10.1	10.1	59.356	0	11.458	106000000	15	2.55313	0.0048227	1.56646	1.18514	Q8WVX9;E9PNW8;E9PPB8	Q8WVX9;E9PNW8	Fatty acyl-CoA reductase 1	FAR1	3368
22.6907	22.3156	22.3073	21.7265	24.0691	23.8764	23.6865	23.3376	+	LFQ intensity LSD1_LFQ intensity NLS	16	16	16	45.2	45.2	45.2	46.676	0	121.65	1000000000	168	2.96305	0.00480565	1.48234	1.18318	Q9NZC7;A0A087WZG5;F5H3R5	Q9NZC7	WW domain-containing oxidoreductase	WWOX	4105
18.9691	17.8151	19.0209	19.0633	20.1581	20.2877	20.3101	20.265	+	LFQ intensity LSD1_LFQ intensity NLS	4	4	4	28.5	28.5	28.5	30.382	0	9.4445	41400000	10	2.64207	0.00478873	1.53808	1.18027	Q9Y478;F5H2X8;O43741	Q9Y478	5-AMP-activated protein kinase subunit beta-1	PRKAB1	4340
18.5731	19.8269	19.002	19.0238	20.2419	20.8346	20.6186	20.8191	+	LFQ intensity LSD1_LFQ intensity NLS	6	6	6	25.8	25.8	25.8	45.251	0	14.763	86800000	32	2.67328	0.00495439	1.52213	1.17472	Q92643;B1AK81;A6NEM5	Q92643;B1AK81;A6NEM5	GPI-anchor transamidase	PIGK	3412
17.4864	17.7537	18.6721	17.3566	19.2372	19.3145	19.3645	19.4536	+	LFQ intensity LSD1_LFQ intensity NLS	4	3	3	5.4	4.6	4.6	106.9	0	6.1876	55900000	20	2.64539	0.00510995	1.52527	1.17313	A0A087WXD2;H7C5T8;H7C4U7;H7C535;A0A087WT53;Q96QZ7	A0A087WXD2;H7C5T8;H7C4U7;H7C535;A0A087WT53;Q96QZ7	Membrane-associated guanylate kinase, WW and PDZ domain-containing protein 1	MAGI1	25
17.088	18.5992	20.8499	19.9463	20.9024	21.0756	21.5777	21.5404	+	LFQ intensity LSD1_LFQ intensity NLS	7	7	7	22.4	22.4	22.4	57.548	0	18.696	152000000	23	1.3739	0.00522917	2.15316	1.17181	P49257	P49257	Protein ERGIC-53	LMAN1	2105
17.9066	19.7553	17.6183	17.4065	20.0156	20.1206	19.9316	19.8377	+	LFQ intensity LSD1_LFQ intensity NLS	6	6	6	14.3	14.3	14.3	92.819	0	9.8431	105000000	20	1.80397	0.00521107	1.80469	1.17104	Q3KQU3;E9PLH3;C9JIR3;H0YF21	Q3KQU3	MAP7 domain-containing protein 1	MAP7D1	2773
20.7056	20.8269	20.9672	20.265	21.7836	21.8987	22.3156	22.5451	+	LFQ intensity LSD1_LFQ intensity NLS	14	14	14	10.4	10.4	10.4	216.5	0	33.184	277000000	66	3.08175	0.00520207	1.4446	1.17075	Q9H1A4;H0Y564;F8WAS1	Q9H1A4;H0Y564	Anaphase-promoting complex subunit 1	ANAPC1	3839
22.3403	22.5685	22.6298	22.7182	23.5165	24.002	23.9406	24.4041	+	LFQ intensity LSD1_LFQ intensity NLS	36	36	36	38.7	38.7	38.7	128.98	0	151.59	885000000	195	3.39063	0.00528276	1.4016	1.16921	Q8WUM0	Q8WUM0	Nuclear pore complex protein Nup133	NUP133	3355
21.8461	21.1581	20.8499	21.0292	22.5685	22.5846	22.6606	22.7715	+	LFQ intensity LSD1_LFQ intensity NLS	28	28	28	36.2	36.2	36.2	120.27	0	204.82	561000000	114	3.16454	0.00537221	1.42547	1.16587	Q86V48;E5RFK8;E5RHU7	Q86V48	Leucine zipper protein 1	LUZP1	3111
25.0233	25.4707	25.2714	25.0854	26.604	26.5624	26.4908	26.3745	+	LFQ intensity LSD1_LFQ intensity NLS	77	77	77	42.5	42.5	42.5	251.11	0	323.31	8340000000	950	4.58391	0.00543345	1.29521	1.16403	Q5VUA4;U3KQ37	Q5VUA4	Zinc finger protein 318	ZNF318	2898
19.5897	20.1079	19.6714	19.6903	21.4676	20.895	21.5165	20.8346	+	LFQ intensity LSD1_LFQ intensity NLS	9	9	9	12.7	12.7	12.7	131.29	0	28.079	142000000	39	3.21726	0.00541497	1.41363	1.16266	Q86YC2	Q86YC2	Partner and localizer of BRCA2	PALB2	3138
20.3645	20.343	21.0821	18.556	21.7389	21.6497	21.823	22.3936	+	LFQ intensity LSD1_LFQ intensity NLS	9	9	7	11.8	11.8	9.4	121.74	0	40.044	259000000	41	1.74078	0.00547119	1.81488	1.16053	Q9Y3P9	Q9Y3P9	Rab GTPase-activating protein 1	RABGAP1	4332
21.4375	21.3045	21.5356	21.0821	22.6497	22.7056	22.391	22.9672	+	LFQ intensity LSD1_LFQ intensity NLS	11	11	11	41.8	41.8	41.8	40.259	0	46.305	529000000	73	3.89878	0.00546193	1.33842	1.16021	Q15545;A0A096LPC3	Q15545	Transcription initiation factor TFIID subunit 7	TAF7	2699
20.7223	20.3101	20.4676	20.4972	21.5451	21.9916	21.714	22.0886	+	LFQ intensity LSD1_LFQ intensity NLS	10	10	10	25.3	25.3	25.3	83.642	0	51.299	198000000	61	3.93292	0.0054527	1.33552	1.16018	Q9BXB4;H7C487;Q9BXB5	Q9BXB4	Oxysterol-binding protein-related protein 11	OSBPL11	3761
23.5404	23.1285	22.8839	22.6822	24.4738	24.654	24.3031	24.3712	+	LFQ intensity LSD1_LFQ intensity NLS	48	48	15	39.6	39.6	14.8	194.1	0	323.31	1690000000	359	3.36133	0.00544351	1.39181	1.16	Q8IZH2;C9JCZ8;F8WDA0	Q8IZH2	5-3 exoribonuclease 1	XRN1	3196
20.7389	19.8921	18.27	19.3649	21.5961	21.2764	21.1269	21.3266	+	LFQ intensity LSD1_LFQ intensity NLS	14	14	14	17.5	17.5	17.5	140.02	0	219.64	155000000	46	1.81573	0.00548915	1.76503	1.15682	Q8NDI1;C9K0H9;B5MC86;Q8N3D4;C9J268;C9IYU2;E9PSB0;H7BZ98;H0YDZ9;E9PIH6	Q8NDI1	EH domain-binding protein 1	EHBP1	3270
17.6889	19.528	20.002	19.8238	21.265	21.2477	20.6971	20.9951	+	LFQ intensity LSD1_LFQ intensity NLS	11	11	11	14.3	14.3	14.3	138.6	0	27.98	92700000	33	1.76291	0.00548	1.79057	1.15568	O15357;A0A0A0MTP6;F5GY16;H7BXR2;F5H588	O15357;A0A0A0MTP6	Phosphatidylinositol 3,4,5-trisphosphate 5-phosphatase 2	INPPL1	1364
23.6209	23.3239	22.9619	23.0625	24.7077	24.6649	24.4551	24.4984	+	LFQ intensity LSD1_LFQ intensity NLS	36	36	36	42.7	42.7	42.7	116.92	0	323.31	1900000000	389	3.80296	0.00554561	1.33924	1.15465	O15294;C9JZL3	O15294	UDP-N-acetylglucosamine--peptide N-acetylglucosaminyltransferase 110 kDa subunit	OGT	1362
18.7039	19.1206	19.6024	18.5878	19.9316	20.6186	20.4273	21.4476	+	LFQ intensity LSD1_LFQ intensity NLS	9	9	9	48.4	48.4	48.4	31.844	0	44.13	139000000	51	2.19847	0.00552727	1.60258	1.15249	O75461;F8WC40;F8WEZ5;Q2Z196;Q2Z197	O75461	Transcription factor E2F6	E2F6	1498
20.8651	21.2244	21.8576	20.2535	22.4996	22.3962	22.5731	22.9847	+	LFQ intensity LSD1_LFQ intensity NLS	9	9	9	14.1	14.1	14.1	75.475	0	31.894	393000000	82	2.31609	0.00557377	1.56327	1.1499	P28288	P28288	ATP-binding cassette sub-family D member 3	ABCD3	1909
22.2593	21.714	21.7265	21.7876	23.5638	23.3511	23.0999	22.9388	+	LFQ intensity LSD1_LFQ intensity NLS	19	19	19	30.9	30.9	30.9	106.33	0	139.37	664000000	122	3.44378	0.00555556	1.36658	1.14889	B9EGE7;Q8TCN5	B9EGE7;Q8TCN5	Zinc finger protein 507	ZNF507	502
19.9459	20.6714	20.0951	20.7223	21.9882	21.8307	21.7755	21.4425	+	LFQ intensity LSD1_LFQ intensity NLS	11	11	11	10.7	10.7	10.7	174.88	0	97.471	148000000	23	3.06177	0.00564251	1.40056	1.13981	Q14160;H0YCG0;H0YDF9;Q5T0G3;Q9BTT6	Q14160	Protein scribble homolog	SCRIB	2597
17.1991	18.4951	17.9488	19.7106	20.0691	19.6886	20.6453	20.0821	+	LFQ intensity LSD1_LFQ intensity NLS	9	9	9	14	14	14	110.5	0	43.443	79600000	15	1.70772	0.00563344	1.78287	1.13961	Q96A65	Q96A65	Exocyst complex component 4	EXOC4	3463
20.3752	20.3101	20.7634	20.4874	22.0821	21.5356	21.823	21.7265	+	LFQ intensity LSD1_LFQ intensity NLS	7	7	1	18.8	18.8	2.5	48.099	0	53.718	260000000	49	3.87623	0.0056064	1.30779	1.13576	B4DLN1;P52815	B4DLN1			439
22.3988	22.3348	22.2419	20.9672	22.9707	23.5285	23.8481	24.002	+	LFQ intensity LSD1_LFQ intensity NLS	28	28	28	24.6	24.6	24.6	153.89	0	95.57	1010000000	178	2.10002	0.00559744	1.60161	1.13573	Q92878;E7ESD9;E7EN38;E9PM98;H7C0P8;C9JNH8	Q92878	DNA repair protein RAD50	RAD50	3425
28.4707	28.0914	28.0453	28.1361	29.3992	29.4394	29.3367	29.6424	+	LFQ intensity LSD1_LFQ intensity NLS	120	120	120	59.6	59.6	59.6	273.42	0	323.31	50600000000	2319	4.43444	0.00558852	1.2685	1.13546	P49327;J3KTF0	P49327	Fatty acid synthase;[Acyl-carrier-protein] S-acetyltransferase;[Acyl-carrier-protein] S-malonyltransferase;3-oxoacyl-[acyl-carrier-protein] synthase;3-oxoacyl-[acyl-carrier-protein] reductase;3-hydroxyacyl-[acyl-carrier-protein] dehydratase;Enoyl-[acyl-carrier-protein] reductase;Oleoyl-[acyl-carrier-protein] hydrolase	FASN	2107
18.3879	20.8034	20.417	19.0213	21.3045	21.7836	21.5117	21.2006	+	LFQ intensity LSD1_LFQ intensity NLS	21	21	21	14.9	14.9	14.9	235.31	0	150.94	247000000	63	1.65596	0.00586667	1.79272	1.13113	Q8NFU7	Q8NFU7	Methylcytosine dioxygenase TET1	TET1	3292
20.9742	20.6971	21.4476	20.1946	22.1612	22.0854	22.4775	22.3403	+	LFQ intensity LSD1_LFQ intensity NLS	8	8	8	37.1	37.1	37.1	29.892	0	51.871	375000000	74	2.69557	0.0060566	1.43771	1.12629	A0A0A0MQS1;Q53H96;B5MD87;F8WEI0	A0A0A0MQS1;Q53H96;B5MD87	Pyrroline-5-carboxylate reductase;Pyrroline-5-carboxylate reductase 3	PYCRL	179
19.3145	18.4642	18.5815	19.3702	20.4576	21.3045	20.7223	19.6347	+	LFQ intensity LSD1_LFQ intensity NLS	2	2	2	14.5	14.5	14.5	24.495	0	9.7428	122000000	28	2.04557	0.00610658	1.59718	1.12423	H0YEL0;O14893;G5EA29;H0YDP6	H0YEL0;O14893;G5EA29;H0YDP6	Gem-associated protein 2	GEMIN2	1029
20.2419	20.3211	20.1581	19.853	21.6453	21.1642	21.4066	21.502	+	LFQ intensity LSD1_LFQ intensity NLS	7	7	7	22.7	22.7	22.7	48.939	0	51.725	278000000	66	3.96017	0.00609703	1.28601	1.12422	E9PL17;Q92989;E9PJM4;E9PKV5	E9PL17;Q92989	Polyribonucleotide 5-hydroxyl-kinase Clp1	CLP1	775
20.1206	17.4264	19.4894	19.649	21.9742	20.7634	21.5117	20.1457	+	LFQ intensity LSD1_LFQ intensity NLS	10	10	10	23.8	23.8	23.8	90.309	0	68.953	107000000	23	1.43403	0.00615913	1.92743	1.12014	E9PG22;Q8IW35;F8WF91;H7C4Y5	E9PG22;Q8IW35	Centrosomal protein of 97 kDa	CEP97	746
21.1519	20.5261	21.0156	20.7389	22.2214	22.1612	21.8651	22.502	+	LFQ intensity LSD1_LFQ intensity NLS	11	11	11	14.3	14.3	14.3	106.37	0	135.3	287000000	93	3.35293	0.00627864	1.32929	1.11561	P57740;H0YG15;G3V1T4	P57740	Nuclear pore complex protein Nup107	NUP107	2248
22.6714	22.9043	21.6928	22.6029	23.7895	24.0275	23.8481	23.867	+	LFQ intensity LSD1_LFQ intensity NLS	34	34	34	38.6	38.6	38.6	154.29	0	323.31	1420000000	303	2.70437	0.00624	1.41518	1.11337	Q14207;H0YET3;E9PKJ1	Q14207	Protein NPAT	NPAT	2605
19.6204	17.8968	19.0795	19.5375	20.5165	20.2764	20.9601	20.6971	+	LFQ intensity LSD1_LFQ intensity NLS	9	9	7	22.1	22.1	18.6	67.585	0	23.384	109000000	24	2.0149	0.00639017	1.57898	1.10993	P10398;Q96II5	P10398;Q96II5	Serine/threonine-protein kinase A-Raf	ARAF	1719
23.4425	23.3511	23.1596	23.5754	24.6431	24.604	24.7945	24.4298	+	LFQ intensity LSD1_LFQ intensity NLS	29	29	29	51.2	51.2	51.2	78.576	0	323.31	2020000000	422	4.41433	0.0063706	1.23568	1.10817	Q6NZY4;F5GXQ6;F5H6J5;F5GX80;F5H803;F5GYI9	Q6NZY4	Zinc finger CCHC domain-containing protein 8	ZCCHC8	2966
19.0769	19.5878	18.9937	18.9714	20.5261	21.0088	20.4375	20.1206	+	LFQ intensity LSD1_LFQ intensity NLS	11	11	11	10.1	10.1	10.1	217.33	0	32.867	108000000	46	2.95071	0.00636086	1.36578	1.10658	Q5T5U3;A0A087WW76;E7ESW5;F8W9U9	Q5T5U3;A0A087WW76;E7ESW5;F8W9U9	Rho GTPase-activating protein 21	ARHGAP21	2865
16.8667	16.777	18.6592	18.6226	19.1053	19.3211	19.2185	20.343	+	LFQ intensity LSD1_LFQ intensity NLS	5	5	5	16.8	16.8	16.8	51.727	0	28.753	41800000	12	1.59294	0.00644275	1.76558	1.10487	Q9HAD4;H0YAA3;H0YAI6;D6RA22;D6RJA5;D6RH33;D6R9E7;D6RB94;B4DK73;H0Y9Z3;B4DHS8;D6RE66;A0A0C4DG28;D6RIX6;D6R9M1;D6RBY6	Q9HAD4;H0YAA3	WD repeat-containing protein 41	WDR41	3932
22.9316	23.178	22.3962	22.5638	24.1871	24.239	23.867	24.0443	+	LFQ intensity LSD1_LFQ intensity NLS	25	25	25	39.5	39.5	39.5	75.718	0	167.35	1030000000	199	3.28457	0.0065736	1.31694	1.1017	Q9H6T3	Q9H6T3	RNA polymerase II-associated protein 3	RPAP3	3896
24.6096	24.5638	24.2244	24.317	25.5841	25.7821	25.4769	25.8264	+	LFQ intensity LSD1_LFQ intensity NLS	49	49	7	46.5	46.5	5.4	175.29	0	323.31	3230000000	541	4.21861	0.00655371	1.23865	1.10122	Q5SW79;E5RJT5;E5RFU8;E5RIH6	Q5SW79	Centrosomal protein of 170 kDa	CEP170	2848
21.3962	20.7307	21.0756	20.8346	22.4676	22.8365	21.9777	22.2006	+	LFQ intensity LSD1_LFQ intensity NLS	13	13	13	28.4	28.4	28.4	72.757	0	48.578	417000000	53	2.9202	0.0066284	1.36134	1.10083	O95905;C9J316;F2Z2R1;C9JGV1	O95905;C9J316	Protein SGT1	ECD	1608
22.6649	22.4375	22.7471	23.0241	23.9225	24.1095	23.8764	23.9225	+	LFQ intensity LSD1_LFQ intensity NLS	18	18	18	52.6	52.6	52.6	46.44	0	86.013	959000000	172	4.08678	0.00703448	1.23933	1.09509	P50454;E9PPV6;E9PR70;E9PKH2;E9PK86;E9PMI5;E9PNX1;E9PJH8;E9PIG2;E9PRS3;E9PQ34;H0YEP8;E9PLA6	P50454;E9PPV6;E9PR70;E9PKH2	Serpin H1	SERPINH1	2136
21.2302	20.1581	18.2522	20.2419	21.5961	21.7715	21.5685	22.1047	+	LFQ intensity LSD1_LFQ intensity NLS	24	5	5	49.9	8.7	8.7	57.718	0	143.77	247000000	46	1.51811	0.00702395	1.78958	1.09489	B2RB02	B2RB02		EPB41L3	422
18.8779	19.9601	19.4108	19.7106	21.0886	20.9672	20.6096	20.7634	+	LFQ intensity LSD1_LFQ intensity NLS	12	12	12	14.2	14.2	14.2	168.16	0	49.09	112000000	42	2.75475	0.00704903	1.36736	1.08867	A0A0D9SGJ6;J3KQV8;O43426;J3KPK1;C9JFZ1;C9JW66;H7BZ56;C9J1Z6;H7BZC2	A0A0D9SGJ6;J3KQV8;O43426;J3KPK1;C9JFZ1;C9JW66	Synaptojanin-1	SYNJ1	333
21.8269	21.5309	21.502	21.6276	23.0559	22.7553	22.6231	22.9189	+	LFQ intensity LSD1_LFQ intensity NLS	19	19	19	39.1	39.1	39.1	78.763	0	56.903	573000000	77	4.2786	0.00703858	1.21646	1.08649	P10244	P10244	Myb-related protein B	MYBL2	1718
19.9601	20.5823	19.1531	18.9065	21.0559	21.502	21.4015	20.7955	+	LFQ intensity LSD1_LFQ intensity NLS	6	6	6	10	10	10	141.18	0	18.384	157000000	40	1.99305	0.00702815	1.5382	1.08598	C9K0J5;Q70E73;C9J164	C9K0J5;Q70E73;C9J164	Ras-associated and pleckstrin homology domains-containing protein 1	RAPH1	577
20.0951	21.0625	18.9982	21.4526	22.1856	22.2792	22.0789	21.823	+	LFQ intensity LSD1_LFQ intensity NLS	11	9	9	28.5	25.8	25.8	78.054	0	24.523	426000000	63	1.63867	0.00708419	1.68957	1.08523	Q92997;F8WCF1;C9K0P9	Q92997	Segment polarity protein dishevelled homolog DVL-3	DVL3	3441
22.5592	22.3511	21.9985	22.0088	23.3778	23.5404	23.4041	23.5404	+	LFQ intensity LSD1_LFQ intensity NLS	29	29	29	28	28	28	177.97	0	94.508	811000000	157	3.86555	0.00725991	1.23626	1.08082	Q5T5Y3	Q5T5Y3	Calmodulin-regulated spectrin-associated protein 1	CAMSAP1	2867
19.0008	17.1027	18.9868	18.5905	22.1426	20.0156	20.265	18.9906	+	LFQ intensity LSD1_LFQ intensity NLS	4	4	4	54.2	54.2	54.2	6.3304	0	6.0956	93900000	11	1.29031	0.00722807	1.93326	1.07643	E5RGN3;E5RIM7;O00244	E5RGN3;E5RIM7;O00244	Copper transport protein ATOX1	ATOX1	649
18.265	18.3136	18.2547	18.9662	19.5878	20.3538	19.2489	20.2877	+	LFQ intensity LSD1_LFQ intensity NLS	4	4	4	4.3	4.3	4.3	210.29	0	6.4829	64700000	16	2.3551	0.007207	1.41969	1.07524	Q8NDV7;H7C269;H3BTQ1	Q8NDV7;H7C269;H3BTQ1	Trinucleotide repeat-containing gene 6A protein	TNRC6A	3273
22.8307	22.2244	22.9024	22.7553	24.1015	23.9847	23.8481	23.7995	+	LFQ intensity LSD1_LFQ intensity NLS	29	29	29	37.5	37.5	37.5	103.08	0	187.72	960000000	259	3.51754	0.00719651	1.25521	1.07401	Q9H3U1	Q9H3U1	Protein unc-45 homolog A	UNC45A	3865
20.0691	20.265	20.2877	17.542	20.9098	21.2185	21.5498	21.7471	+	LFQ intensity LSD1_LFQ intensity NLS	11	11	11	14	14	14	128.4	0	33.738	190000000	37	1.40191	0.00726163	1.81534	1.07218	Q9P2R3;I3L1Z9;I3L3P8	Q9P2R3	Rabankyrin-5	ANKFY1	4142
17.515	19.1507	17.7339	18.042	19.9459	20.6186	19.6258	18.7916	+	LFQ intensity LSD1_LFQ intensity NLS	5	5	5	17	17	17	40.746	0	7.8515	90900000	18	1.68279	0.00725109	1.63509	1.07206	P55039;A8MZF9;J3KRL5;J3QL90;J3QR71;J3QKV7;J3QRI9;J3QKW7	P55039;A8MZF9	Developmentally-regulated GTP-binding protein 2	DRG2	2217
19.2442	20.895	19.3167	19.6971	21.3699	20.714	21.7715	21.4775	+	LFQ intensity LSD1_LFQ intensity NLS	11	10	10	23.6	22.7	22.7	86.131	0	34.582	136000000	38	1.88749	0.00721965	1.54495	1.07105	O43815	O43815	Striatin	STRN	1414
23.1127	22.4093	23.0173	22.8014	24.3511	24.2021	23.9043	23.9672	+	LFQ intensity LSD1_LFQ intensity NLS	16	16	10	42.7	42.7	28.4	64.436	0	284.4	1120000000	173	3.29728	0.00727378	1.27099	1.07028	Q9H0L4	Q9H0L4	Cleavage stimulation factor subunit 2 tau variant	CSTF2T	3829
23.2492	22.8614	22.5731	22.5938	24.1332	24.1332	24.002	23.9847	+	LFQ intensity LSD1_LFQ intensity NLS	34	34	34	52.9	52.9	52.9	94.474	0	318.92	1620000000	363	3.58233	0.00726331	1.24391	1.06983	Q5T5X7	Q5T5X7	BEN domain-containing protein 3	BEND3	2866
18.8817	17.7627	19.7207	19.8018	20.3211	20.5545	20.6714	21.0156	+	LFQ intensity LSD1_LFQ intensity NLS	7	7	7	7.2	7.2	7.2	155.98	0	21.501	124000000	36	1.74369	0.00725287	1.59896	1.06887	Q9H2M9	Q9H2M9	Rab3 GTPase-activating protein non-catalytic subunit	RAB3GAP2	3851
19.4576	19.3101	19.1457	19.0158	20.417	20.2989	20.3857	20.5823	+	LFQ intensity LSD1_LFQ intensity NLS	11	11	11	8.1	8.1	8.1	243.08	0	44.071	98900000	47	4.36152	0.00729412	1.18871	1.06796	Q93074;Q7Z3Z5;H7C191	Q93074;Q7Z3Z5	Mediator of RNA polymerase II transcription subunit 12	MED12;TNRC11	3446
18.039	17.9783	18.237	19.3177	20.4273	19.8621	20.0559	19.2065	+	LFQ intensity LSD1_LFQ intensity NLS	3	3	3	15.2	15.2	15.2	26.244	0.00053008	3.0753	30900000	7	1.99529	0.00727325	1.49494	1.0646	Q9NQZ6	Q9NQZ6	Zinc finger C4H2 domain-containing protein	ZC4H2	3992
20.5638	20.4273	20.3962	20.7471	21.4923	21.6051	22.0258	21.8499	+	LFQ intensity LSD1_LFQ intensity NLS	20	20	20	6.4	6.4	6.4	573.83	0	43.603	288000000	52	3.80408	0.00738331	1.20967	1.0571	Q5T4S7;A0A0A0MSW0;X6R960;X6RE05	Q5T4S7	E3 ubiquitin-protein ligase UBR4	UBR4	2863
17.8137	18.2475	20.3752	20.5261	21.8034	20.9098	20.2877	21.4825	+	LFQ intensity LSD1_LFQ intensity NLS	5	5	5	18.5	18.5	18.5	44.23	0	19.125	111000000	26	1.27987	0.00737288	1.88021	1.05641	Q13561;F8VW18;F8W1I6;F8VRV7;H0YI98;H0YHL1;F8VX93	Q13561;F8VW18;F8W1I6;F8VRV7;H0YI98	Dynactin subunit 2	DCTN2	2563
20.3101	20.2302	20.002	20.5356	22.1519	21.8307	21.6096	20.9098	+	LFQ intensity LSD1_LFQ intensity NLS	9	9	9	27	27	27	55.846	0	20.013	165000000	41	2.50119	0.00743741	1.35604	1.05496	Q13325	Q13325	Interferon-induced protein with tetratricopeptide repeats 5	IFIT5	2536
20.9951	20.9024	21.0625	21.2477	21.9424	22.0886	22.5915	22.5451	+	LFQ intensity LSD1_LFQ intensity NLS	17	17	17	35.7	35.7	35.7	70.182	0	163.84	457000000	100	3.35801	0.00741655	1.23996	1.05235	Q9UBU9;E9PIN3;B4E227;E9PQA4;E9PLA7;H0YDU0	Q9UBU9;E9PIN3	Nuclear RNA export factor 1	NXF1	4163
23.5165	23.4425	23.1991	23.4425	24.5869	24.8044	24.5165	24.3712	+	LFQ intensity LSD1_LFQ intensity NLS	45	45	44	28	28	27.6	270.63	0	323.31	1460000000	304	4.30696	0.0074581	1.16959	1.05017	P46821;D6RA32;D6RA40;D6RCL2;D6RGJ3	P46821	Microtubule-associated protein 1B;MAP1B heavy chain;MAP1 light chain LC1	MAP1B	2078
24.3101	24.918	25.0935	24.8093	25.8576	25.767	26.1927	26.5165	+	LFQ intensity LSD1_LFQ intensity NLS	29	29	29	46.7	46.7	46.7	81.307	0	209.42	4510000000	474	2.78951	0.00756546	1.30075	1.04922	P33993;C9J8M6	P33993	DNA replication licensing factor MCM7	MCM7	1963
20.4874	20.68	17.7665	20.2066	21.9098	21.5069	21.6627	21.1642	+	LFQ intensity LSD1_LFQ intensity NLS	16	16	3	20.4	20.4	4.1	138.13	0	43.974	253000000	72	1.35912	0.00766713	1.77579	1.04609	E7EQ57;E7EUL6;H9KVD4;Q8IU84;E9PGE9;E7EU48;E7EPY2;C9JU02;E7ERX0;Q13465	E7EQ57;E7EUL6		MECOM	676
17.3425	19.0451	17.8202	19.7853	20.1079	19.8995	19.9112	20.7223	+	LFQ intensity LSD1_LFQ intensity NLS	3	3	1	8.4	8.4	1.6	71.504	0	5.1624	59500000	6	1.51162	0.00765651	1.66194	1.04419	R4GNG3;Q14161	R4GNG3;Q14161	ARF GTPase-activating protein GIT2	GIT2	2598
20.7715	19.7439	21.6928	19.668	22.1047	21.8423	21.8307	22.3403	+	LFQ intensity LSD1_LFQ intensity NLS	12	12	3	19.3	19.3	4.4	112.96	0	25.377	286000000	48	1.70633	0.00764592	1.56045	1.04418	O15084	O15084	Serine/threonine-protein phosphatase 6 regulatory ankyrin repeat subunit A	ANKRD28	1348
20.9601	18.1341	19.2635	18.367	20.7389	21.002	20.8423	20.9742	+	LFQ intensity LSD1_LFQ intensity NLS	8	8	8	11.5	11.5	11.5	128.41	0	20.174	112000000	13	1.4215	0.00794513	1.70815	1.03908	Q9Y2H2	Q9Y2H2	Phosphatidylinositide phosphatase SAC2	INPP5F	4299
27.726	27.4938	27.0914	27.1604	28.7129	28.632	28.5682	28.3869	+	LFQ intensity LSD1_LFQ intensity NLS	103	103	82	56.9	56.9	47.6	217.1	0	323.31	31300000000	1675	3.49746	0.00805464	1.2071	1.03736	F5GWX5;A0A0C4DGG9;Q14839;F5H6N4;F6T542	F5GWX5;A0A0C4DGG9;Q14839	Chromodomain-helicase-DNA-binding protein 4	CHD4	297	+
25.1055	24.7129	25.4831	24.9628	26.4598	26.5285	25.8264	26.5898	+	LFQ intensity LSD1_LFQ intensity NLS	16	16	16	71.3	71.3	71.3	29.506	0	207.41	4160000000	263	2.76778	0.00810354	1.28505	1.03703	P61289;K9J957;K7ENH2;A0A087WTV2;K7ESG5;B3KQ25;B7Z8D3;K7EPX6;K7EKR3;K7EMD0;K7EJF8	P61289;K9J957;K7ENH2;A0A087WTV2;K7ESG5;B3KQ25	Proteasome activator complex subunit 3	PSME3	2285
19.2855	19.6293	19.6558	18.1242	20.5545	20.6714	20.6886	20.4375	+	LFQ intensity LSD1_LFQ intensity NLS	7	7	7	14	14	14	83.023	0	17.963	107000000	23	2.08747	0.00808152	1.4143	1.03645	Q8TBA6;H0YK03	Q8TBA6	Golgin subfamily A member 5	GOLGA5	3312
17.7405	18.356	18.3876	18.6307	18.963	19.5582	20.5915	19.7455	+	LFQ intensity LSD1_LFQ intensity NLS	11	11	11	8.6	8.6	8.6	195.91	0	32.865	77800000	19	2.00494	0.00815197	1.43584	1.03575	Q8IWJ2;B8ZZW2;A0A087WZR8;B8ZZA5;H7BYJ9	Q8IWJ2;B8ZZW2	GRIP and coiled-coil domain-containing protein 2	GCC2	3159
24.8385	24.6971	24.6431	24.9225	25.9562	25.9157	26.1661	25.6784	+	LFQ intensity LSD1_LFQ intensity NLS	66	66	66	44.2	44.2	44.2	236.02	0	323.31	4280000000	726	4.16609	0.00837736	1.15382	1.03135	F8VPD4;P27708;H7C2E4;H7BZB3;H7C3Z5;P31327	F8VPD4;P27708	CAD protein;Glutamine-dependent carbamoyl-phosphate synthase;Aspartate carbamoyltransferase;Dihydroorotase	CAD	884
22.0493	21.3699	21.9847	22.1111	23.0002	22.9243	23.0789	23.5404	+	LFQ intensity LSD1_LFQ intensity NLS	20	20	20	30.4	30.4	30.4	107.89	0	157.05	613000000	147	2.9006	0.00854155	1.25724	1.03013	O60763;REV__R4GMN2;REV__Q5VZ89;REV__R4GNB2;REV__R4GN35	O60763	General vesicular transport factor p115	USO1	1450
22.6006	22.5545	22.0258	22.2125	23.5869	23.4298	23.5522	23.5285	+	LFQ intensity LSD1_LFQ intensity NLS	22	22	22	38.5	38.5	38.5	97.071	0	301.47	884000000	162	3.77369	0.00851872	1.17599	1.02969	P33981;D6RF82;D6REX1;D6RIC6;D6RFY1	P33981	Dual specificity protein kinase TTK	TTK	1960
17.7218	18.1176	18.2687	19.7493	20.002	19.83	19.8361	20.0821	+	LFQ intensity LSD1_LFQ intensity NLS	5	5	5	9.3	9.3	9.3	109.65	0	8.9714	40800000	6	1.77889	0.00870651	1.4732	1.01744	H0YAN8;O15013;E9PB39	H0YAN8;O15013	Rho guanine nucleotide exchange factor 10	ARHGEF10	1017
17.4738	19.6311	17.3035	19.1195	20.0691	20.1703	19.4456	20.4375	+	LFQ intensity LSD1_LFQ intensity NLS	6	6	6	13.7	13.7	13.7	99.692	0	10.056	105000000	23	1.42379	0.00868344	1.64862	1.01732	A0JP02;B4DJX4;Q9HAU0;H0YGJ6	A0JP02;B4DJX4;Q9HAU0	Pleckstrin homology domain-containing family A member 5	PLEKHA5	336
18.6943	18.9279	18.6464	18.182	20.68	20.654	19.7439	19.113	+	LFQ intensity LSD1_LFQ intensity NLS	5	5	5	10.1	10.1	10.1	96.263	0	15.319	36000000	9	1.88789	0.00867196	1.43507	1.01713	Q8N0Z3	Q8N0Z3	Spindle and centriole-associated protein 1	SPICE1	3200	+
20.6364	20.8499	20.4874	20.9601	21.5685	21.6364	22.2961	22.6209	+	LFQ intensity LSD1_LFQ intensity NLS	10	10	10	37.9	37.9	37.9	51.169	0	47.832	262000000	43	2.46778	0.00872919	1.297	1.01542	P23258;Q9NRH3;K7EIS0;K7EKE5	P23258;Q9NRH3;K7EIS0;K7EKE5	Tubulin gamma-1 chain;Tubulin gamma-2 chain;Tubulin gamma chain	TUBG1;TUBG2	1860
17.3601	17.6702	18.0217	18.9542	19.3387	19.3452	19.5489	19.2581	+	LFQ intensity LSD1_LFQ intensity NLS	4	4	4	1.7	1.7	1.7	505.64	0	5.5645	39700000	10	2.10298	0.00871768	1.37112	1.01517	H0Y390;H3BPE1;H3BQK9;Q9UPN3;E9PNZ4;H0Y6T5;H0Y4F5;H0Y314;E9PLY5	H0Y390;H3BPE1;H3BQK9;Q9UPN3;E9PNZ4	Microtubule-actin cross-linking factor 1, isoforms 1/2/3/5	MACF1	990
20.1703	21.4425	20.5451	20.6627	21.8385	21.8987	22.2535	22.0359	+	LFQ intensity LSD1_LFQ intensity NLS	19	18	1	18.7	18.1	1.1	150.6	0	44.091	292000000	71	2.4346	0.00879578	1.30147	1.01465	A0A075B6Q3;H7C4B2	A0A075B6Q3;H7C4B2		BCORL1	11
18.0389	19.0532	18.5953	19.3211	21.5117	20.8191	21.0224	18.5825	+	LFQ intensity LSD1_LFQ intensity NLS	6	6	6	13.2	13.2	13.2	79.274	0	28.68	62300000	16	1.29973	0.00886202	1.7318	1.01371	Q9Y223	Q9Y223	Bifunctional UDP-N-acetylglucosamine 2-epimerase/N-acetylmannosamine kinase;UDP-N-acetylglucosamine 2-epimerase (hydrolyzing);N-acetylmannosamine kinase	GNE	4286
23.6431	23.391	22.8461	22.9334	24.4984	24.6811	24.239	24.3101	+	LFQ intensity LSD1_LFQ intensity NLS	46	46	29	27.1	27.1	20.6	274.25	0	323.31	1750000000	361	2.91996	0.00889529	1.22875	1.01246	O75179;H0YM23;H0YLQ3	O75179;H0YM23	Ankyrin repeat domain-containing protein 17	ANKRD17	1477
19.6382	20.0821	19.3924	20.2066	20.7634	21.1457	21.2877	21.0625	+	LFQ intensity LSD1_LFQ intensity NLS	10	10	10	16.2	16.2	16.2	120.85	0	26.409	102000000	20	2.86551	0.00888366	1.235	1.01232	P28749;H0YE05;E9PNB6	P28749	Retinoblastoma-like protein 1	RBL1	1913
18.1528	20.6714	18.445	20.9672	20.9098	21.5915	21.2877	21.5261	+	LFQ intensity LSD1_LFQ intensity NLS	11	11	9	21.1	21.1	18.9	87.208	0	38.845	167000000	30	1.25205	0.00887206	1.76965	1.01207	Q13033;G3V340;G3V3G7;H0YJT2	Q13033	Striatin-3	STRN3	2509
23.7895	23.8191	23.7077	23.7594	24.6865	24.7945	24.9977	24.9495	+	LFQ intensity LSD1_LFQ intensity NLS	26	26	26	53.2	53.2	53.2	68.249	0	198.61	1780000000	252	5.16091	0.0088605	1.0881	1.01187	Q9H9A6	Q9H9A6	Leucine-rich repeat-containing protein 40	LRRC40	3925
18.5722	17.8127	18.1686	18.6108	19.7891	19.4313	19.2673	19.6114	+	LFQ intensity LSD1_LFQ intensity NLS	2	2	2	7.7	7.7	7.7	70.075	0	5.5653	36400000	3	2.86938	0.00895833	1.23374	1.01178	X6REB3;P15923;K7ENI0;K7ELF3;K7ENH8;A0A0A0MRB7	X6REB3;P15923;K7ENI0;K7ELF3;K7ENH8;A0A0A0MRB7	Transcription factor E2-alpha	TCF3	1784	+
27.9146	27.5682	27.9869	27.9595	28.9896	29.019	28.7833	29.2007	+	LFQ intensity LSD1_LFQ intensity NLS	43	43	43	78.6	78.6	78.6	59.62	0	323.31	74400000000	1270	3.92228	0.0090026	1.14088	1.00992	P50990;H7C4C8;H7C2U0	P50990	T-complex protein 1 subunit theta	CCT8	2147
17.0587	19.0129	18.4639	17.9472	19.3559	19.6505	19.7876	19.4252	+	LFQ intensity LSD1_LFQ intensity NLS	5	5	5	9.5	9.5	9.5	88.318	0	7.9282	89000000	8	1.81516	0.00933333	1.43413	1.00476	Q96N46;F8WDA3;C9JCY7;C9J974;F8WDH5	Q96N46	Tetratricopeptide repeat protein 14	TTC14	3586
23.9406	23.7695	23.7995	24.1174	25.0691	25.1449	25.1984	24.7441	+	LFQ intensity LSD1_LFQ intensity NLS	76	71	69	42.4	40.9	39.6	278.16	0	322.83	2300000000	559	3.91245	0.00958247	1.13236	1.00278	O75369;E7EN95;A0A0A0MT44;H7C5L4;A0A0C4DGA1	O75369;E7EN95	Filamin-B	FLNB	1486
21.6006	20.8346	20.7307	21.2185	22.1079	22.3239	22.3592	22.4501	+	LFQ intensity LSD1_LFQ intensity NLS	14	14	14	25	25	25	79.49	0	41.114	356000000	77	2.92043	0.00957014	1.21419	1.00259	Q8TC07;C9JA93;F8VV61;F8WCB5;F8WDJ1;F8WF35	Q8TC07;C9JA93	TBC1 domain family member 15	TBC1D15	3317
20.7715	20.1206	20.417	20.1946	21.343	21.5261	21.8987	21.4972	+	LFQ intensity LSD1_LFQ intensity NLS	9	9	9	21.7	21.7	21.7	73.48	0	51.838	164000000	21	3.14201	0.00962259	1.19032	1.00216	Q9P0U3;F8VRZ8	Q9P0U3	Sentrin-specific protease 1	SENP1	4120
24.7492	25.3376	25.0105	25.2571	26.3494	26.1546	26.3307	26.1115	+	LFQ intensity LSD1_LFQ intensity NLS	27	8	1	76.9	27.6	2.7	49.953	0	122.93	5200000000	220	3.6506	0.00961026	1.14797	1.00176	Q9BVA1	Q9BVA1	Tubulin beta-2B chain	TUBB2B	3734
18.4347	19.6168	19.209	18.5644	20.1703	20.4273	19.9882	20.4273	+	LFQ intensity LSD1_LFQ intensity NLS	5	5	3	15.8	15.8	8.3	47.256	0	10.524	83800000	23	2.31989	0.00966115	1.29704	0.999485	A0A087X0G7;A0A087WUW6;A0A087X1B1;Q9Y6K9;A0A087WV30;C9JN51;C9JH59	A0A087X0G7;A0A087WUW6;A0A087X1B1;Q9Y6K9;A0A087WV30;C9JN51	NF-kappa-B essential modulator	IKBKG	55
22.2125	22.2506	21.9316	22.0559	22.8249	23.2821	23.5165	23.5522	+	LFQ intensity LSD1_LFQ intensity NLS	26	26	26	36.3	36.3	36.3	121.72	0	116.02	954000000	176	3.1852	0.00972519	1.18127	0.998638	Q9NNW5;A0A087X295;E9PDU5;E9PBK6;Q6PKC6;C9K020;V9GYU1;E5RFX3;F8WE36;C9JFP6	Q9NNW5;A0A087X295;E9PDU5;E9PBK6	WD repeat-containing protein 6	WDR6	3966
26.5492	27.1507	25.9912	26.726	27.6998	28.1652	27.9372	27.673	+	LFQ intensity LSD1_LFQ intensity NLS	25	5	5	72.8	16.9	16.9	47.766	0	179.73	11800000000	207	2.49882	0.00971283	1.26451	0.99849	Q5JP53;P07437;Q5ST81;G3V2A3	Q5JP53;P07437;Q5ST81	Tubulin beta chain	TUBB	1683
22.2302	22.2905	22.5045	22.2764	23.7286	23.3239	23.2961	23.4041	+	LFQ intensity LSD1_LFQ intensity NLS	16	16	16	33.5	33.5	33.5	83.541	0	146.83	788000000	150	4.11925	0.00974463	1.11276	0.996461	Q99567;J3KMX1;I3L245;I3L4K7;I3L2W3	Q99567;J3KMX1	Nuclear pore complex protein Nup88	NUP88	3648
17.8942	17.5084	18.5489	19.0348	19.2512	19.6697	19.7157	19.7586	+	LFQ intensity LSD1_LFQ intensity NLS	5	5	5	7.3	7.3	7.3	153.1	0	10.538	49400000	7	2.03011	0.0098512	1.35216	0.994952	Q99570;D6RJ98	Q99570	Phosphoinositide 3-kinase regulatory subunit 4	PIK3R4	3649
20.0821	20.343	19.0373	19.5823	21.0951	20.8876	20.7056	21.8538	+	LFQ intensity LSD1_LFQ intensity NLS	12	12	12	37.7	37.7	37.7	51.495	0	35.96	238000000	40	1.93768	0.0100579	1.37433	0.993642	A0A024R0Y4;O75478;A0A087WWR4;A0A087WTV5;A0A087WU71;A0A087WZS1;A0A087WYK3	A0A024R0Y4;O75478;A0A087WWR4;A0A087WTV5	Transcriptional adapter 2-alpha	TADA2L;TADA2A	1
21.5117	21.2535	21.1457	21.3266	22.4775	22.3538	22.1916	22.7348	+	LFQ intensity LSD1_LFQ intensity NLS	35	18	16	18.5	11.8	10.3	269.45	0	159.29	417000000	113	3.74742	0.0100326	1.13005	0.992994	Q8IWZ3;E9PDP5;H7C2F5;H3BLS9;D6RHC4;H0Y4P6;A0A0A0MQZ8;H0Y7Y3;H0Y785;H0Y472;H7C2E1	Q8IWZ3;E9PDP5	Ankyrin repeat and KH domain-containing protein 1	ANKHD1	3165
20.3101	20.2877	20.5638	20.6627	21.8876	21.417	21.7995	21.3266	+	LFQ intensity LSD1_LFQ intensity NLS	12	12	12	9.3	9.3	9.3	196.04	0	89.041	210000000	59	3.33848	0.01034	1.15158	0.986828	Q5SRE5;H7C4K7	Q5SRE5	Nucleoporin NUP188 homolog	NUP188	2845
17.9065	17.8539	19.1385	18.6719	19.3299	19.7455	19.3277	21.4425	+	LFQ intensity LSD1_LFQ intensity NLS	9	9	9	11.7	11.7	11.7	128.48	0	80.996	59700000	11	1.42056	0.0103142	1.56873	0.985557	E9PDF6;O43795;H7C2Y7;C9JYW1;E7EQD9;Q9UBC5;C9JUP5;G3V342	E9PDF6;O43795;H7C2Y7	Unconventional myosin-Ib	MYO1B	734
18.5853	17.7105	19.614	19.5164	21.6627	22.6497	18.5663	20.3752	+	LFQ intensity LSD1_LFQ intensity NLS	9	2	2	62.8	8.5	8.5	10.807	1	-2	273000000	16	1.02169	0.0105839	1.9569	0.983996	A0A087X0W4;A0A087WVR6	A0A087X0W4		ACACA	145
24.8623	24.8044	24.5869	24.7995	25.6757	25.7695	25.8881	26.0567	+	LFQ intensity LSD1_LFQ intensity NLS	39	39	39	45.2	45.2	45.2	133.77	0	323.31	5150000000	620	4.38817	0.0105707	1.08424	0.98386	O14654	O14654	Insulin receptor substrate 4	IRS4	1318
17.9967	18.9969	17.9317	18.1297	18.5849	19.7488	20.2066	20.265	+	LFQ intensity LSD1_LFQ intensity NLS	5	5	5	11.4	11.4	11.4	71.106	0	10.153	23600000	4	1.68269	0.0106369	1.43757	0.983449	Q9BQI3;H7C033	Q9BQI3	Eukaryotic translation initiation factor 2-alpha kinase 1	EIF2AK1	3682
19.7022	19.6505	19.8408	17.9574	20.7056	20.5451	20.714	20.8802	+	LFQ intensity LSD1_LFQ intensity NLS	11	11	11	19	19	19	106.35	0	21.833	145000000	47	1.70849	0.0108198	1.42348	0.981385	Q8TE76	Q8TE76	MORC family CW-type zinc finger protein 4	MORC4	3332
24.8717	24.7594	24.5926	24.7286	26.0772	25.9316	25.6237	25.705	+	LFQ intensity LSD1_LFQ intensity NLS	52	52	52	53	53	53	134.32	0	323.31	4270000000	639	4.04077	0.0108403	1.09629	0.979956	Q96JH7	Q96JH7	Deubiquitinating protein VCIP135	VCPIP1	3561
20.9672	20.7389	20.0951	20.6886	21.928	21.9098	21.5309	21.8385	+	LFQ intensity LSD1_LFQ intensity NLS	9	9	9	23.1	23.1	23.1	64.232	0	63.616	251000000	87	2.89183	0.011066	1.17932	0.976575	F5GZ78;P49023;F5H836;H0YIE4	F5GZ78;P49023	Paxillin	PXN	836
19.8113	20.0691	20.0691	18.5759	20.4576	21.2361	20.7955	21.68	+	LFQ intensity LSD1_LFQ intensity NLS	9	9	9	12.7	12.7	12.7	158.3	0	22.836	117000000	20	1.71433	0.0110525	1.41099	0.976446	Q96RT1	Q96RT1	Protein LAP2	ERBB2IP	3614
17.8566	19.6731	19.006	20.0559	20.4375	20.8034	20.7389	20.4375	+	LFQ intensity LSD1_LFQ intensity NLS	5	5	5	29	29	29	31.263	0	11.377	115000000	27	1.59826	0.011039	1.45639	0.976326	B5MCT7;P49593;A8MX49;C9J2F3	B5MCT7;P49593	Protein phosphatase 1F	PPM1F	463
22.7451	22.3962	22.265	22.3565	23.7796	23.6649	23.5045	23.2961	+	LFQ intensity LSD1_LFQ intensity NLS	16	16	16	38	38	38	72.832	0	148.29	797000000	138	3.55183	0.0112165	1.12057	0.975707	Q8N0X7	Q8N0X7	Spartin	SPG20	3199
19.7683	20.6971	21.2877	21.3538	21.8689	21.8913	22.1174	22.7856	+	LFQ intensity LSD1_LFQ intensity NLS	12	12	12	36.1	36.1	36.1	49.184	0	91.725	247000000	74	1.76791	0.0113439	1.38908	0.974809	P62191;G3V4X1	P62191	26S protease regulatory subunit 4	PSMC1	2302	+
21.6928	21.1395	20.8651	21.1457	22.44	22.1395	22.2506	22.7286	+	LFQ intensity LSD1_LFQ intensity NLS	12	12	12	37.2	37.2	37.2	39.933	0	55.797	365000000	85	2.80119	0.011457	1.17887	0.96937	Q96A49	Q96A49	Synapse-associated protein 1	SYAP1	3462
21.0292	21.1143	21.5685	21.7348	22.4576	22.2273	22.6431	22.823	+	LFQ intensity LSD1_LFQ intensity NLS	20	20	19	28	28	27	118.08	0	86.02	495000000	117	2.81895	0.0114431	1.17606	0.968836	Q4VCS5;E7ERM3;A6NP16	Q4VCS5;E7ERM3;A6NP16	Angiomotin	AMOT	2791
17.6938	18.1929	17.4685	19.0606	19.9459	19.5069	19.7939	18.7511	+	LFQ intensity LSD1_LFQ intensity NLS	3	3	3	6.4	6.4	6.4	105.02	0	4.5317	35000000	10	1.70814	0.0115115	1.39551	0.967954	Q8TEV9	Q8TEV9	Smith-Magenis syndrome chromosomal region candidate gene 8 protein	SMCR8	3339
19.7812	19.734	19.5299	19.0821	20.7471	20.5451	20.8576	20.5356	+	LFQ intensity LSD1_LFQ intensity NLS	6	6	6	16.1	16.1	16.1	65.111	0	37.991	102000000	41	3.16513	0.0115604	1.13956	0.967404	Q5VV42	Q5VV42	Threonylcarbamoyladenosine tRNA methylthiotransferase	CDKAL1	2902
24.4298	25.1604	24.558	24.7077	25.7995	25.8504	25.9539	25.7441	+	LFQ intensity LSD1_LFQ intensity NLS	57	57	57	58.4	58.4	58.4	150.78	0	323.31	6300000000	773	3.30144	0.0116635	1.123	0.963619	Q9ULM3;H0Y6M6	Q9ULM3	YEATS domain-containing protein 2	YEATS2	4244
17.4144	19.0373	18.0788	19.103	19.8891	19.7439	19.4835	19.9882	+	LFQ intensity LSD1_LFQ intensity NLS	33	1	1	56.1	3.1	3.1	69.889	0	4.0712	63300000	29	1.7605	0.0116495	1.36778	0.963078	Q4VB86	Q4VB86		EPB41	2788
21.4874	21.2185	20.9951	21.0886	22.7389	22.6253	22.0493	22.0359	+	LFQ intensity LSD1_LFQ intensity NLS	13	12	2	25.5	24.2	3.2	105.31	0	42.394	376000000	87	2.79013	0.0119808	1.16498	0.95911	Q9Y467	Q9Y467	Sal-like protein 2	SALL2	4339
24.5225	23.9043	23.8576	24.1253	25.228	25.1174	25.141	25.3545	+	LFQ intensity LSD1_LFQ intensity NLS	47	47	47	43.2	43.2	43.2	168.59	0	323.31	3390000000	507	3.33387	0.0126033	1.10781	0.954252	Q8TEQ6	Q8TEQ6	Gem-associated protein 5	GEMIN5	3338
23.9225	23.3239	23.4551	22.7512	24.8717	24.6865	24.3844	24.3578	+	LFQ intensity LSD1_LFQ intensity NLS	57	43	34	38.8	32.7	25.9	226.59	0	275.35	2380000000	382	2.37384	0.0127811	1.21192	0.953516	Q12873;H7C3H7;H7C2H0;K7EPV1;I3L1I4	Q12873	Chromodomain-helicase-DNA-binding protein 3	CHD3	2491	+
19.9882	20.6971	21.5261	20.1457	22.1825	21.8073	22.2678	21.417	+	LFQ intensity LSD1_LFQ intensity NLS	10	10	10	13.4	13.4	13.4	109.96	0	54.862	234000000	47	1.80564	0.0133648	1.32942	0.950785	O43592;F8WDU6;F5GYW6;F5GZM3	O43592	Exportin-T	XPOT	1400
21.2764	21.5777	22.0625	21.5404	22.7675	22.6298	22.6843	22.8073	+	LFQ intensity LSD1_LFQ intensity NLS	11	11	10	37.3	37.3	34.9	46.939	0	63.613	451000000	94	3.22521	0.0135294	1.10798	0.948124	Q9Y2T2;H0YBM0	Q9Y2T2	AP-3 complex subunit mu-1	AP3M1	4311
22.9006	22.3645	22.9654	22.5892	23.7594	23.6865	23.7389	24.0105	+	LFQ intensity LSD1_LFQ intensity NLS	57	57	57	28	28	28	292.75	0	323.31	1180000000	283	3.35345	0.0138592	1.09388	0.944973	Q92616	Q92616	Translational activator GCN1	GCN1L1	3407
24.6153	24.8142	24.8481	24.6096	25.6891	25.7441	25.9517	25.6348	+	LFQ intensity LSD1_LFQ intensity NLS	69	69	69	47.9	47.9	47.9	189.03	0	323.31	5040000000	770	4.47235	0.0139039	1.03313	0.944368	Q9UK61;A0A087X0F1	Q9UK61;A0A087X0F1	Protein FAM208A	FAM208A	4215
18.1744	18.3699	19.4098	17.9612	20.2066	20.5823	20.4874	18.5662	+	LFQ intensity LSD1_LFQ intensity NLS	8	7	7	12.7	11.9	11.9	93.696	0	15.351	77500000	9	1.38881	0.0142108	1.48179	0.943411	Q9UJA3	Q9UJA3	DNA helicase MCM8	MCM8	4202
23.7695	23.7796	22.7776	23.155	24.7492	24.4738	24.5812	24.417	+	LFQ intensity LSD1_LFQ intensity NLS	29	29	29	47	47	47	102.02	0	323.31	2210000000	284	2.44282	0.0143298	1.18489	0.943121	Q8IYH5;C9JUA4;C9J283	Q8IYH5	ZZ-type zinc finger-containing protein 3	ZZZ3	3186
21.7389	21.6231	21.502	21.9243	22.6928	22.9261	22.7695	22.5983	+	LFQ intensity LSD1_LFQ intensity NLS	9	9	9	23.1	23.1	23.1	36.034	0	19.949	538000000	88	4.04456	0.0143131	1.04961	0.942635	Q9NZ01;M0R3C3;M0QXM3	Q9NZ01;M0R3C3	Very-long-chain enoyl-CoA reductase	TECR	4102
18.5287	18.0109	18.0421	19.2219	19.6488	19.9601	19.2349	19.9742	+	LFQ intensity LSD1_LFQ intensity NLS	3	3	3	1.6	1.6	1.6	422.39	0	8.9408	46800000	11	2.03487	0.0144028	1.2536	0.94112	Q709C8	Q709C8	Vacuolar protein sorting-associated protein 13C	VPS13C	3028
24.6264	24.632	24.0691	24.6264	25.726	25.6125	25.6292	25.3511	+	LFQ intensity LSD1_LFQ intensity NLS	18	18	18	65.3	65.3	65.3	33.777	0	142.67	5180000000	344	3.29469	0.0147256	1.0912	0.939732	P46109	P46109	Crk-like protein	CRKL	2070
20.8802	20.6096	19.8284	20.4066	21.9742	21.3321	21.4118	21.7675	+	LFQ intensity LSD1_LFQ intensity NLS	13	13	13	16.1	16.1	16.1	130.32	0	30.222	191000000	25	2.34879	0.014787	1.19019	0.937615	O75132	O75132	Zinc finger BED domain-containing protein 4	ZBED4	1470
19.606	20.7389	19.786	21.0821	20.895	21.6584	21.8385	22.3101	+	LFQ intensity LSD1_LFQ intensity NLS	17	17	17	21.1	21.1	21.1	136.45	0	96.511	249000000	65	1.59401	0.0147359	1.37223	0.937016	O60315;E7EUW9;U3KQ51;E7ESP8;U3KPV5;H7C0G0	O60315;E7EUW9	Zinc finger E-box-binding homeobox 2	ZEB2	1432
19.2922	19.3921	18.8017	18.6156	19.853	19.9301	20.3857	20.7056	+	LFQ intensity LSD1_LFQ intensity NLS	7	7	7	12.8	12.8	12.8	95.575	0	15.884	67600000	26	2.31373	0.0148782	1.19322	0.936075	Q5VSL9;Q9ULQ0	Q5VSL9	Striatin-interacting protein 1	STRIP1	2891
24.0854	24.2096	24.5344	24.3239	25.0233	25.3066	25.4923	25.7024	+	LFQ intensity LSD1_LFQ intensity NLS	32	32	28	58.6	58.6	52.8	79.372	0	270.64	3240000000	447	3.13602	0.0152794	1.09282	0.931786	E7ESY4;Q13330;H0Y4T7;F8VSM3;F8W9Y9;F8VPC5;H0YIV8;H7C3F3;C9JJM0	E7ESY4;Q13330;H0Y4T7	Metastasis-associated protein MTA1	MTA1	694	+
18.5657	19.8965	19.1137	18.2274	19.2604	20.6096	20.9459	20.6627	+	LFQ intensity LSD1_LFQ intensity NLS	13	13	13	9.4	9.4	9.4	247.89	0	69.238	121000000	40	1.45243	0.015262	1.41884	0.930819	Q9Y2F5;A0A096LPH9	Q9Y2F5	Little elongation complex subunit 1	ICE1	4298
21.0292	21.6714	21.8269	22.0426	22.5237	22.5615	23.1301	23.0935	+	LFQ intensity LSD1_LFQ intensity NLS	11	11	11	39.8	39.8	39.8	44.323	0	31.987	287000000	81	2.30942	0.0153174	1.18467	0.930387	E9PM69;R4GNH3;P17980;E9PN50;E9PMD8;E9PKD5;E9PLG2	E9PM69;R4GNH3;P17980;E9PN50;E9PMD8;E9PKD5	26S protease regulatory subunit 6A	PSMC3	788	+
20.8034	20.3645	20.5069	20.5545	21.1703	21.4775	21.9847	22.3184	+	LFQ intensity LSD1_LFQ intensity NLS	9	9	9	7.6	7.6	7.6	186.49	0	29.526	156000000	28	2.31161	0.0153235	1.18041	0.927968	Q15058	Q15058	Kinesin-like protein KIF14	KIF14	2666
22.3538	22.0122	22.0156	22.1581	23.2961	23.0918	22.9388	23.417	+	LFQ intensity LSD1_LFQ intensity NLS	18	18	18	28	28	28	123.11	0	137.73	595000000	165	3.65659	0.0153741	1.051	0.927386	Q92625	Q92625	Ankyrin repeat and SAM domain-containing protein 1A	ANKS1A	3411
24.4425	24.5696	24.1642	24.3511	25.5105	25.4457	25.1719	25.5374	+	LFQ intensity LSD1_LFQ intensity NLS	41	41	41	53.6	53.6	53.6	118.87	0	240.89	3580000000	512	3.88249	0.0154447	1.0345	0.92406	Q9ULJ3;Q5KS07;E7EVF9	Q9ULJ3	Zinc finger and BTB domain-containing protein 21	ZBTB21	4241
20.8423	19.7553	17.7846	18.0124	20.3538	20.8423	20.6006	21.0359	+	LFQ intensity LSD1_LFQ intensity NLS	16	16	16	26.9	26.9	26.9	93.532	0	112.82	427000000	34	1.13246	0.0155806	1.60948	0.922922	Q8TD16	Q8TD16	Protein bicaudal D homolog 2	BICD2	3323
22.9079	23.632	23.5983	23.0258	24.275	23.9495	25.1946	24.632	+	LFQ intensity LSD1_LFQ intensity NLS	8	8	2	41.8	41.8	14.4	23.072	0	96.449	2040000000	154	2.01658	0.015604	1.22175	0.920899	X1WI28;P27635;B8A6G2;A6QRI9	X1WI28;P27635	60S ribosomal protein L10	RPL10	1901
20.7796	21.9531	21.1079	21.6497	22.6186	22.5451	22.4451	22.5261	+	LFQ intensity LSD1_LFQ intensity NLS	24	24	24	8.7	8.7	8.7	593.38	0	69.661	398000000	131	2.322	0.0157991	1.16119	0.917024	O14686;F8VWW4	O14686	Histone-lysine N-methyltransferase 2D	KMT2D	1319
22.7935	23.0902	23.0054	23.2288	23.9225	23.9495	24.0854	24.2463	+	LFQ intensity LSD1_LFQ intensity NLS	32	32	17	31.7	31.7	19.1	164.19	0	289.55	1380000000	282	3.89216	0.0158708	1.02144	0.914008	P39880	P39880	Homeobox protein cut-like 1	CUX1	2014
20.5915	21.0292	21.002	20.5915	21.6714	21.7389	22.5592	21.7836	+	LFQ intensity LSD1_LFQ intensity NLS	37	37	32	16.4	16.4	15.1	396.21	0	244.78	472000000	103	2.47635	0.0158532	1.13474	0.913912	E7EVZ1;Q86UP3;E5RI93;E5RGK3;E5RHS1;E5RG79;H0YC81	E7EVZ1;Q86UP3	Zinc finger homeobox protein 4	ZFHX4	710
21.7223	20.9742	20.8876	20.8269	22.8269	22.5615	22.7735	21.3645	+	LFQ intensity LSD1_LFQ intensity NLS	16	16	16	26.5	26.5	26.5	90.359	0	65.133	361000000	108	1.71918	0.015818	1.27885	0.91201	Q9Y6A5;E7EMT0;C9JA91;Q8IX09;C9JWI7;H0Y8F2;F8WC55	Q9Y6A5	Transforming acidic coiled-coil-containing protein 3	TACC3	4387
21.8651	21.7836	22.8365	22.9725	22.8839	23.4676	23.8764	24.6096	+	LFQ intensity LSD1_LFQ intensity NLS	21	21	20	40.4	40.4	38.2	66.408	0	127.24	653000000	118	1.50962	0.016146	1.34497	0.909153	P20700;E9PBF6;A0A0D9SFE5;A0A0D9SFY5	P20700;E9PBF6;A0A0D9SFE5	Lamin-B1	LMNB1	1837
20.9024	20.8113	20.6453	20.8727	21.7307	21.7675	21.6364	22.3962	+	LFQ intensity LSD1_LFQ intensity NLS	10	10	10	15.1	15.1	15.1	111.08	0	28.188	252000000	62	2.97144	0.0161282	1.0748	0.908802	Q9Y6Y8;A0A0C4DH82;H7C0V8;H7C4C4	Q9Y6Y8	SEC23-interacting protein	SEC23IP	4400
19.7521	19.4913	20.1581	19.8995	21.0821	20.895	21.1642	20.5165	+	LFQ intensity LSD1_LFQ intensity NLS	4	4	4	15.1	15.1	15.1	34.012	0	30.633	125000000	40	2.7923	0.0161498	1.08925	0.907338	P53007;B4DP62	P53007;B4DP62	Tricarboxylate transport protein, mitochondrial	SLC25A1	2193
24.0105	24.1642	24.0526	24.1488	25.0401	25.0526	24.9628	25.1174	+	LFQ intensity LSD1_LFQ intensity NLS	45	45	45	35.9	35.9	35.9	213.62	0	323.31	2620000000	474	5.917	0.0163117	0.949192	0.904941	P35658;A0A0A0MSW3;H0YF36;H0Y837;B7ZAV2;E9PKD2;H0YDS4	P35658;A0A0A0MSW3	Nuclear pore complex protein Nup214	NUP214	1987
24.4923	24.5045	25.0526	24.9933	25.5898	25.6703	26.1293	25.9912	+	LFQ intensity LSD1_LFQ intensity NLS	126	126	126	34.1	34.1	34.1	532.4	0	323.31	4300000000	870	2.8	0.0162939	1.08448	0.904541	Q14204;H0YJ21	Q14204	Cytoplasmic dynein 1 heavy chain 1	DYNC1H1	2604
19.5676	17.414	19.7257	18.9964	20.0951	20.5451	20.0292	20.6364	+	LFQ intensity LSD1_LFQ intensity NLS	11	11	11	10.8	10.8	10.8	178.97	0	18.504	74700000	28	1.35992	0.016333	1.40053	0.903655	Q9H3S7	Q9H3S7	Tyrosine-protein phosphatase non-receptor type 23	PTPN23	3864
23.7594	23.8576	23.4298	23.5285	24.5344	24.6649	25.1174	24.4984	+	LFQ intensity LSD1_LFQ intensity NLS	19	15	15	48.6	39.3	39.3	55.364	0	254.82	4240000000	250	3.0557	0.0163716	1.05998	0.90319	Q92769;H3BM24;E5RFI6;E5RJ04;E5RGV4;E5RHE7;E5RH52;E5RG37;E5RFP9	Q92769	Histone deacetylase 2	HDAC2	3419	+
20.1457	20.2535	20.3962	20.6627	20.7307	21.4775	21.8689	22.2036	+	LFQ intensity LSD1_LFQ intensity NLS	13	11	10	23.8	21.4	18.6	74.222	0	49.14	324000000	57	1.93873	0.0164013	1.20563	0.902481	P51116;I3L1Z2	P51116	Fragile X mental retardation syndrome-related protein 2	FXR2	2151
21.9777	22.1206	21.632	21.3211	22.8895	22.8614	22.7077	22.8595	+	LFQ intensity LSD1_LFQ intensity NLS	15	15	15	36.5	36.5	36.5	78.21	0	40.864	431000000	105	2.93626	0.0164788	1.06663	0.900791	Q8IZ21	Q8IZ21	Phosphatase and actin regulator 4	PHACTR4	3191
19.2255	19.8757	21.1519	20.7553	20.6971	21.5498	22.5475	21.9024	+	LFQ intensity LSD1_LFQ intensity NLS	13	13	13	10.6	10.6	10.6	205.11	0	48.99	209000000	55	1.3028	0.0165174	1.42209	0.899794	Q8TEM1	Q8TEM1	Nuclear pore membrane glycoprotein 210	NUP210	3337
21.391	21.1946	21.2361	21.1269	22.0054	21.9777	22.7223	22.5545	+	LFQ intensity LSD1_LFQ intensity NLS	28	28	28	18.4	18.4	18.4	261.51	0	150.93	306000000	99	2.79649	0.0164995	1.07783	0.89968	Q07864;F5H1D6;F5H7E4	Q07864;F5H1D6	DNA polymerase epsilon catalytic subunit A;DNA polymerase	POLE	2459
18.1254	18.9175	18.0281	18.5297	19.4933	19.528	19.6276	19.3167	+	LFQ intensity LSD1_LFQ intensity NLS	4	4	4	7.2	7.2	7.2	115.08	0	11.753	65600000	20	2.65458	0.0164459	1.09122	0.898975	Q8NB46	Q8NB46	Serine/threonine-protein phosphatase 6 regulatory ankyrin repeat subunit C	ANKRD52	3255
19.64	19.547	19.8817	19.9601	21.0224	20.5069	20.9531	20.68	+	LFQ intensity LSD1_LFQ intensity NLS	11	11	11	10.8	10.8	10.8	194.86	0	150.08	115000000	36	3.26231	0.0165572	1.0334	0.894897	Q9HCM1;J3KPI3	Q9HCM1	Uncharacterized protein KIAA1551	KIAA1551	3956
24.5225	23.867	24.1488	23.8288	25.2244	25.1681	24.9716	25.1833	+	LFQ intensity LSD1_LFQ intensity NLS	30	30	9	36.7	36.7	12.5	141.29	0	260.55	2820000000	437	3.07187	0.0167629	1.04503	0.893231	Q9C0C9;K7EQ12	Q9C0C9	E2/E3 hybrid ubiquitin-protein ligase UBE2O	UBE2O	3806
20.7389	21.6231	21.9985	21.7796	22.6186	22.3936	22.7915	22.9951	+	LFQ intensity LSD1_LFQ intensity NLS	12	12	12	32.2	32.2	32.2	55.52	0	74.539	412000000	110	2.06043	0.0168009	1.16469	0.892874	P43490;A0A0C4DFS8;C9JF35;C9JG65	P43490;A0A0C4DFS8	Nicotinamide phosphoribosyltransferase	NAMPT	2057
20.9316	20.3321	17.3901	20.6971	21.1079	21.1642	21.4015	22.3565	+	LFQ intensity LSD1_LFQ intensity NLS	8	8	8	6.9	6.9	6.9	193.1	0	50.326	124000000	16	0.979495	0.0169785	1.6698	0.890732	Q9H792;H0YN99;H3BUZ5	Q9H792;H0YN99	Pseudopodium-enriched atypical kinase 1	PEAK1	3900
19.9601	20.5915	20.4775	18.3188	20.9171	20.8499	21.5869	21.5545	+	LFQ intensity LSD1_LFQ intensity NLS	9	9	9	12.2	12.2	12.2	118.82	0	29.618	225000000	45	1.31968	0.0169422	1.39012	0.890615	I3L2C7;P57678;I3L399;I3L4M4;I3L4A4;E7EN12;I3L1J7	I3L2C7;P57678	Gem-associated protein 4	GEMIN4	1144
24.3645	24.1015	23.632	23.8764	24.9933	25.1449	24.9134	25.0691	+	LFQ intensity LSD1_LFQ intensity NLS	34	34	33	36.7	36.7	36	142.69	0	271.8	2130000000	331	3.13282	0.0169241	1.03657	0.890407	Q9H2G2	Q9H2G2	STE20-like serine/threonine-protein kinase	SLK	3847
17.7847	20.1457	20.1457	20.0691	20.714	20.7389	20.9951	21.417	+	LFQ intensity LSD1_LFQ intensity NLS	8	7	2	34.3	30.3	7.6	39.393	0	21.952	90500000	15	1.24828	0.0168879	1.42995	0.890109	Q14558;C9JNQ3	Q14558	Phosphoribosyl pyrophosphate synthase-associated protein 1	PRPSAP1	2615
18.9863	19.654	19.1488	17.799	20.5356	20.1703	19.9601	19.9601	+	LFQ intensity LSD1_LFQ intensity NLS	3	3	3	17.9	17.9	17.9	24.126	0	30.991	56000000	9	1.63741	0.0168699	1.25952	0.889841	E9PME6;B1AQP1;P22415;H0YD59	E9PME6;B1AQP1;P22415	Upstream stimulatory factor 1	USF1	419
20.6006	20.0156	20.0691	20.3321	21.2877	21.2764	21.2066	21.2764	+	LFQ intensity LSD1_LFQ intensity NLS	15	15	15	18.3	18.3	18.3	135.78	0	46.057	187000000	67	3.51018	0.0171052	1.00742	0.886946	Q13136;E9PJZ7;H0YEF9;H0YDW2;H0YD72;H0YHK3;G3V200;O75334;H0YF15;R4GNF1;E9PPF6;H0YIJ4;H0YHJ4;H0YH95;R4GN36;M0QZB5;B1APN9;O75335;O75145	Q13136;E9PJZ7	Liprin-alpha-1	PPFIA1	2520
26.7389	26.673	25.918	25.9043	27.6931	27.391	27.3239	27.2445	+	LFQ intensity LSD1_LFQ intensity NLS	91	91	56	47.2	47.2	32.5	290.52	0	323.31	15900000000	1419	2.34966	0.0171966	1.10456	0.883726	Q9HCK8;H0YJA4;G3V2T9;G3V303	Q9HCK8	Chromodomain-helicase-DNA-binding protein 8	CHD8	3955
21.7512	22.0854	21.0559	21.6051	22.9043	22.7755	22.4972	22.6584	+	LFQ intensity LSD1_LFQ intensity NLS	16	16	16	25	25	25	134.36	0	72.658	577000000	145	2.47261	0.0175544	1.08444	0.880706	Q5T481	Q5T481	RNA-binding protein 20	RBM20	2862
20.0426	19.9024	20.2989	20.1206	20.9171	20.8191	21.6453	21.1946	+	LFQ intensity LSD1_LFQ intensity NLS	11	11	11	16.1	16.1	16.1	116.07	0	20.654	160000000	25	2.69363	0.0177889	1.05287	0.87544	V9GYM8;Q92974;V9GYF5;V9GYG5;V9GZ14;V9GYF0;V9GZ58	V9GYM8;Q92974	Rho guanine nucleotide exchange factor 2	ARHGEF2	3436
19.0715	20.0691	18.4228	18.836	20.0951	20.2185	20.0691	20.9316	+	LFQ intensity LSD1_LFQ intensity NLS	4	4	4	20.7	20.7	20.7	41.236	0.00054245	3.524	73900000	6	1.63966	0.0178246	1.2287	0.874682	O75381;K7EK59	O75381	Peroxisomal membrane protein PEX14	PEX14	1488
18.504	17.6097	19.0976	18.4681	19.3495	19.4108	19.4952	20.1825	+	LFQ intensity LSD1_LFQ intensity NLS	3	3	3	4.1	4.1	4.1	138.62	0	8.9338	73200000	25	1.77689	0.0180915	1.18967	0.873384	O00411;K7EMH3	O00411	DNA-directed RNA polymerase, mitochondrial	POLRMT	1292
18.5204	19.9601	19.1028	18.9082	20.3321	19.4991	20.7223	20.9672	+	LFQ intensity LSD1_LFQ intensity NLS	2	2	2	13.2	13.2	13.2	25.565	0	4.2237	76100000	20	1.52961	0.0183718	1.25731	0.871555	P00403	P00403	Cytochrome c oxidase subunit 2	MT-CO2	1626
22.9654	23.1127	22.6907	23.2346	23.8576	24.0526	23.867	24.217	+	LFQ intensity LSD1_LFQ intensity NLS	30	30	2	34.3	34.3	2	146.2	0	323.31	990000000	274	3.33227	0.0184689	0.997676	0.871315	O60271;D6RHI8	O60271	C-Jun-amino-terminal kinase-interacting protein 4	SPAG9	1429
21.1519	20.9388	20.5451	20.9388	22.4626	21.7836	21.5777	22.0326	+	LFQ intensity LSD1_LFQ intensity NLS	14	14	1	23.4	23.4	2.2	88.843	0	323.31	379000000	119	2.46988	0.0184497	1.07049	0.871275	Q9H8E8	Q9H8E8	Cysteine-rich protein 2-binding protein	CSRP2BP	3913
19.2302	18.5533	19.3145	19.5053	21.2877	20.2535	19.9601	19.9054	+	LFQ intensity LSD1_LFQ intensity NLS	2	2	2	10.2	10.2	10.2	29.484	0	19.936	66900000	13	1.69798	0.0186625	1.20083	0.868703	Q96BD8;K7EPW0;K7EP61	Q96BD8;K7EPW0;K7EP61	Spindle and kinetochore-associated protein 1	SKA1	3473
19.9742	20.0156	19.9882	20.0559	20.8113	20.7553	21.0359	21.4626	+	LFQ intensity LSD1_LFQ intensity NLS	11	11	11	32.1	32.1	32.1	57.563	0	72.391	149000000	47	3.10321	0.0187134	1.00781	0.867555	Q9Y285;K7ER00;K7EPH2;K7ER16;K7EK06;K7ERS0	Q9Y285;K7ER00;K7EPH2	Phenylalanine--tRNA ligase alpha subunit	FARSA	4296
19.7439	19.586	18.4211	19.8586	21.2185	20.4874	20.1946	20.5451	+	LFQ intensity LSD1_LFQ intensity NLS	9	9	9	37.5	37.5	37.5	37.629	0	73.769	136000000	33	1.64857	0.0188889	1.209	0.865943	Q5PSV4;H0YHD0	Q5PSV4;H0YHD0	Breast cancer metastasis-suppressor 1-like protein	BRMS1L	2838
21.0156	21.3699	21.5545	21.0886	22.2273	22.1612	22.0224	22.8442	+	LFQ intensity LSD1_LFQ intensity NLS	28	28	28	17.5	17.5	17.5	224.29	0	96.357	415000000	66	2.51656	0.019117	1.05662	0.865535	Q7RTP6;J3KSK6;J3QQT0;E9PP85;C9J922;J3KRP8	Q7RTP6	Protein-methionine sulfoxide oxidase MICAL3	MICAL3	3053
22.2877	22.7975	22.1301	22.2849	23.391	23.2273	23.3376	23.5522	+	LFQ intensity LSD1_LFQ intensity NLS	29	29	29	35.3	35.3	35.3	151.66	0	143.31	603000000	198	3.10669	0.01925	1.00196	0.863399	Q6P2E9;I3L2F4;I3L3M2	Q6P2E9	Enhancer of mRNA-decapping protein 4	EDC4	2977
19.6186	19.5545	19.4435	19.5805	20.5069	20.3538	20.3211	21.0559	+	LFQ intensity LSD1_LFQ intensity NLS	8	8	8	19.4	19.4	19.4	62.974	0	22.466	97900000	20	2.93469	0.0193292	1.01014	0.860076	Q969V3;K7ENM2;K7EMW4;K7ELZ9;A0A0C4DGP7;K7EQ66	Q969V3;K7ENM2;K7EMW4;K7ELZ9;A0A0C4DGP7	Nicalin	NCLN	3459
21.9637	21.7223	21.5685	21.1765	22.5451	22.6779	22.3565	23.0393	+	LFQ intensity LSD1_LFQ intensity NLS	12	12	11	46.3	46.3	43.3	45.626	0	44.81	339000000	82	2.51192	0.0194525	1.04695	0.858696	P62195;J3QSA9;J3QQM1;J3QLH6;J3KRP2;J3QSE0;J3QRW1;J3QRR3;J3KTQ9	P62195;J3QSA9;J3QQM1;J3QLH6;J3KRP2;J3QSE0	26S protease regulatory subunit 8	PSMC5	2303
21.4526	21.7594	22.4041	22.3511	23.2346	22.7573	23.0258	23.2678	+	LFQ intensity LSD1_LFQ intensity NLS	12	12	12	50.3	50.3	50.3	32.182	0	79.365	555000000	98	2.22403	0.0194501	1.07962	0.856998	I3L1P8;Q02978	I3L1P8;Q02978	Mitochondrial 2-oxoglutarate/malate carrier protein	SLC25A11	1139
24.6209	24.2607	24.019	24.3307	25.228	25.1719	25.1795	25.5983	+	LFQ intensity LSD1_LFQ intensity NLS	34	33	15	52.3	51.2	29.7	102.29	0	321.6	3120000000	459	3.07097	0.0201056	0.986599	0.850148	A0A0A0MRA8;Q9Y2J2;J3QS55;J3KT37;J3KS70;J3QKY2;J3KRD1;J3QKK4;J3QR33;J3QRQ6;J3QLU5;J3QS83	A0A0A0MRA8;Q9Y2J2	Band 4.1-like protein 3;Band 4.1-like protein 3, N-terminally processed	EPB41L3	194
20.6006	20.0821	19.8803	17.643	20.9098	21.1581	21.0691	20.714	+	LFQ intensity LSD1_LFQ intensity NLS	8	8	8	16.4	16.4	16.4	88.206	0	17.749	92100000	14	1.11486	0.0201621	1.41123	0.849504	O94782;C9JC88;C9JWX4	O94782	Ubiquitin carboxyl-terminal hydrolase 1	USP1	1541
19.8066	19.5375	21.4874	21.1079	22.0292	21.0691	22.1206	21.9098	+	LFQ intensity LSD1_LFQ intensity NLS	11	11	11	23	23	23	79.467	0	65.531	177000000	41	1.28462	0.0205726	1.29731	0.844453	P28331;B4DJ81;F8WDL5;C9JPQ5	P28331;B4DJ81	NADH-ubiquinone oxidoreductase 75 kDa subunit, mitochondrial	NDUFS1	1910	+
20.9098	21.4324	20.8576	21.2933	21.8461	22.3884	22.1269	22.1047	+	LFQ intensity LSD1_LFQ intensity NLS	11	11	11	31.1	31.1	31.1	55.517	0	54.751	393000000	87	2.82952	0.0205395	0.99327	0.841901	E7EPP6;O14757;J3KN87;E9PPA5;A0A087WY91;E9PJI4;E9PKQ3;A0A087WT52	E7EPP6;O14757;J3KN87	Serine/threonine-protein kinase Chk1	CHEK1	673
22.9061	22.5708	22.6141	22.7735	23.6431	23.6209	23.4923	23.8191	+	LFQ intensity LSD1_LFQ intensity NLS	27	25	25	34.9	31.8	31.8	113.66	0	139.04	903000000	145	4.00074	0.020519	0.927681	0.841732	Q5VTR2;C9J0A5;C9JXC9;C9JWJ4	Q5VTR2	E3 ubiquitin-protein ligase BRE1A	RNF20	2897
18.6627	17.4469	17.5334	17.4155	18.6132	18.8847	18.8484	19.1581	+	LFQ intensity LSD1_LFQ intensity NLS	9	5	5	17.4	8.7	8.7	68.934	0	8.0818	28200000	15	1.8751	0.0204985	1.11145	0.841711	Q9H0B6;A8MZ87	Q9H0B6;A8MZ87	Kinesin light chain 2	KLC2	3823
19.2696	19.2779	20.5915	17.3446	20.9459	20.8269	20.1457	20.2764	+	LFQ intensity LSD1_LFQ intensity NLS	5	4	4	18	15.3	15.3	49.301	0	12.978	108000000	15	1.0627	0.0205458	1.42785	0.841195	O75351	O75351	Vacuolar protein sorting-associated protein 4B	VPS4B	1482
25.5014	25.6891	25.8881	25.8881	26.6998	26.452	26.8858	26.726	+	LFQ intensity LSD1_LFQ intensity NLS	129	129	129	36	36	36	469.08	0	323.31	7500000000	1375	3.49111	0.0205254	0.949191	0.84073	P78527;F5GX40;H0YG84	P78527	DNA-dependent protein kinase catalytic subunit	PRKDC	2375
20.5165	20.265	18.8305	18.8736	21.0426	20.4066	21.2593	20.7634	+	LFQ intensity LSD1_LFQ intensity NLS	10	10	10	24.2	24.2	24.2	78.15	0	32.784	167000000	45	1.37752	0.0207157	1.24657	0.840182	F8W6N3;Q92560;H0Y8E8;F8WEY5;C9J7L9	F8W6N3;Q92560	Ubiquitin carboxyl-terminal hydrolase;Ubiquitin carboxyl-terminal hydrolase BAP1	BAP1	920
24.8481	24.2535	24.6703	24.6811	25.8336	25.4831	25.7771	25.3101	+	LFQ intensity LSD1_LFQ intensity NLS	14	14	11	45.4	45.4	37.4	40.736	0	311.03	3300000000	214	2.85161	0.0207976	0.987721	0.839165	P55036;Q5VWC4;A6PVX3;H0Y3Y9;H0Y561	P55036;Q5VWC4;A6PVX3	26S proteasome non-ATPase regulatory subunit 4	PSMD4	2216
20.3962	20.1206	20.3645	19.8253	21.4324	21.0559	21.0821	21.0359	+	LFQ intensity LSD1_LFQ intensity NLS	8	8	8	19.4	19.4	19.4	66.155	0	62.27	180000000	31	3.01755	0.0208127	0.974904	0.838735	O75529	O75529	TAF5-like RNA polymerase II p300/CBP-associated factor-associated factor 65 kDa subunit 5L	TAF5L	1503
18.4176	20.2535	20.9388	20.5451	20.8191	20.1946	22.6649	22.6475	+	LFQ intensity LSD1_LFQ intensity NLS	3	3	3	27.5	27.5	27.5	17.643	0	6.1851	264000000	21	0.930138	0.0210524	1.54278	0.836482	A0A0A0MRJ2;Q5VTZ4;P18847	A0A0A0MRJ2;Q5VTZ4;P18847	Cyclic AMP-dependent transcription factor ATF-3	ATF3	201
21.0359	21.6096	21.8499	21.7876	22.2506	22.7056	22.695	22.6992	+	LFQ intensity LSD1_LFQ intensity NLS	26	26	26	17.2	17.2	17.2	227.92	0	89.188	442000000	91	2.47368	0.0212095	1.01683	0.835662	Q92621;U3KPX2;U3KQ47;U3KQ97	Q92621	Nuclear pore complex protein Nup205	NUP205	3410
28.141	28.3704	28.1795	28.3704	29.0137	29.1866	29.2979	29.189	+	LFQ intensity LSD1_LFQ intensity NLS	27	27	1	73.9	73.9	2.7	49.83	0	323.31	41700000000	1085	4.40295	0.0211885	0.906481	0.835623	P68371	P68371	Tubulin beta-4B chain	TUBB4B	2360
19.8847	18.1751	17.4176	18.2654	20.265	20.0951	20.4273	18.5488	+	LFQ intensity LSD1_LFQ intensity NLS	6	4	4	18.6	14.3	14.3	47.535	0	10.217	66300000	8	1.07465	0.0212861	1.39832	0.834114	Q13363;D6RAX2;E9PGB1;E7ESU7;E7EPF8;E7EUB3;H0Y8W7;H0Y8U5	Q13363;D6RAX2;E9PGB1;E7ESU7;E7EPF8;E7EUB3	C-terminal-binding protein 1	CTBP1	2539	+
20.4775	20.5638	20.9459	18.2282	21.3962	21.3101	21.6584	21.265	+	LFQ intensity LSD1_LFQ intensity NLS	6	6	6	22	22	22	35.236	0	16.659	190000000	29	1.13736	0.0212652	1.35356	0.833855	Q9UNQ2;A0A0C4DGB1;D6RCL3	Q9UNQ2;A0A0C4DGB1	Probable dimethyladenosine transferase	DIMT1	4261
18.7072	18.6024	18.6835	18.5805	19.901	19.4795	19.3921	19.5127	+	LFQ intensity LSD1_LFQ intensity NLS	5	5	5	12.9	12.9	12.9	63.277	0	11.935	46800000	16	3.67267	0.0213918	0.927894	0.830778	Q9NVH1;B1AK20;Q5TH61	Q9NVH1	DnaJ homolog subfamily C member 11	DNAJC11	4046
16.8113	16.9316	17.7796	18.4815	19.7569	19.3581	18.2232	17.9373	+	LFQ intensity LSD1_LFQ intensity NLS	20	16	1	44.4	38.6	1.3	71.356	0	76.209	337000000	48	1.18016	0.0215112	1.31791	0.83019	O94818	O94818	Nucleolar protein 4	NOL4	1542
22.417	22.2707	22.5961	22.4375	23.239	23.2317	23.3511	23.5285	+	LFQ intensity LSD1_LFQ intensity NLS	24	24	24	27.8	27.8	27.8	150.25	0	215.74	694000000	180	4.09605	0.0216047	0.907271	0.827754	O95163;F5H2T0;H0YDF3	O95163;F5H2T0	Elongator complex protein 1	IKBKAP	1559
19.9083	19.7683	21.3321	20.1703	21.1765	21.6186	21.6757	21.265	+	LFQ intensity LSD1_LFQ intensity NLS	6	6	6	24.2	24.2	24.2	42.272	0	34.324	182000000	29	1.63183	0.0216054	1.13919	0.8273	P51570;K7ERJ9;K7EII7	P51570	Galactokinase	GALK1	2162
19.615	20.0821	19.5204	19.8712	20.6364	20.6627	20.6006	21.0224	+	LFQ intensity LSD1_LFQ intensity NLS	7	6	6	21.4	20.2	20.2	61.687	0	21.194	92300000	43	3.00333	0.0220522	0.958375	0.82576	Q8IU81	Q8IU81	Interferon regulatory factor 2-binding protein 1	IRF2BP1	3142
18.2568	19.0938	17.8209	18.4447	20.1332	20.1581	20.2302	18.2277	+	LFQ intensity LSD1_LFQ intensity NLS	7	7	7	14.8	14.8	14.8	103.96	0	9.9109	77200000	11	1.2233	0.0220309	1.28324	0.825689	Q96JK2;Q8TBB7;G3V3S1	Q96JK2	DDB1- and CUL4-associated factor 5	DCAF5	3562
20.7307	22.0292	20.7307	21.5638	21.9024	22.7035	22.6276	22.343	+	LFQ intensity LSD1_LFQ intensity NLS	31	31	31	24.5	24.5	24.5	226.35	0	218.7	607000000	111	1.65268	0.0220598	1.13053	0.825468	O60293;G3V1X1	O60293	Zinc finger C3H1 domain-containing protein	ZFC3H1	1431
20.4273	20.8727	20.3211	20.5165	21.3266	21.4526	21.3156	22.0156	+	LFQ intensity LSD1_LFQ intensity NLS	10	10	10	40.3	40.3	40.3	34.856	0	82.965	175000000	49	2.55008	0.0220385	0.993225	0.824736	Q9UNE7;H3BS86;H3BUD0;H3BTA3	Q9UNE7;H3BS86;H3BUD0	E3 ubiquitin-protein ligase CHIP	STUB1	4258
18.2702	18.8238	18.8752	18.712	19.6258	19.4252	19.5337	19.9882	+	LFQ intensity LSD1_LFQ intensity NLS	6	6	6	15.8	15.8	15.8	64.97	0	11.441	74400000	25	2.73286	0.0222615	0.972947	0.821767	P17098;K7EQD1	P17098	Zinc finger protein 8	ZNF8	1798
19.4536	19.5526	19.9882	20.2877	20.8876	20.6186	20.9098	20.8269	+	LFQ intensity LSD1_LFQ intensity NLS	5	5	2	12.7	12.7	5	62.606	0	14.557	145000000	45	2.53334	0.0222402	0.990194	0.821553	A0A0A0MT11;Q13555;Q5SWX3;A0A0A0MS52;Q8WU40;H0Y6G2;H7BXS4;D6RHX9;E9PBE8;E7EQE4;H7C394	A0A0A0MT11;Q13555;Q5SWX3;A0A0A0MS52;Q8WU40	Calcium/calmodulin-dependent protein kinase type II subunit gamma	CAMK2G	237
25.2463	24.9584	24.391	24.5926	25.8528	25.8336	25.6237	25.8069	+	LFQ intensity LSD1_LFQ intensity NLS	34	34	2	42.4	42.4	2.1	97.016	0	323.31	4330000000	481	2.59933	0.0224314	0.982177	0.820226	P11171	P11171	Protein 4.1	EPB41	1729
24.3443	24.8858	25.895	25.2426	26.2335	26.0752	26.228	26.1546	+	LFQ intensity LSD1_LFQ intensity NLS	25	25	25	53.7	53.7	53.7	59.75	0	274.48	4790000000	380	1.78615	0.0232436	1.08089	0.81434	P25705;K7EK77;K7ERX7;K7EJP1;K7EQH4;K7ENJ4;K7ESA0	P25705	ATP synthase subunit alpha, mitochondrial	ATP5A1	1884
22.5915	22.1015	22.8557	22.1642	23.5983	23.4551	23.3778	23.178	+	LFQ intensity LSD1_LFQ intensity NLS	6	6	6	48.9	48.9	48.9	25.863	0	118.91	542000000	79	2.55851	0.0235615	0.974093	0.812034	Q9NYP9	Q9NYP9	Protein Mis18-alpha	MIS18A	4097
21.6231	22.7451	23.0526	22.8745	23.5754	23.417	23.6209	24.0608	+	LFQ intensity LSD1_LFQ intensity NLS	23	23	23	52.7	52.7	52.7	48.633	0	133.6	672000000	124	1.6843	0.0235336	1.0947	0.810108	P35998;C9JLS9	P35998	26S protease regulatory subunit 7	PSMC2	1991
20.9882	20.8727	21.1886	21.5069	22.2448	22.1825	21.8614	22.0359	+	LFQ intensity LSD1_LFQ intensity NLS	7	7	7	22.6	22.6	22.6	52.743	0	29.154	324000000	52	2.93056	0.0235114	0.94208	0.81003	O15269	O15269	Serine palmitoyltransferase 1	SPTLC1	1360
23.5285	23.4923	23.895	23.8385	24.6264	24.3031	24.8764	24.7024	+	LFQ intensity LSD1_LFQ intensity NLS	25	25	23	37	37	34.6	107.14	0	142.63	1490000000	163	2.98349	0.0234891	0.938529	0.810019	P53618;E9PP73;E9PP63	P53618	Coatomer subunit beta	COPB1	2199
20.3321	20.3321	20.3752	20.1946	21.5638	21.1269	20.9316	21.3045	+	LFQ intensity LSD1_LFQ intensity NLS	6	6	4	13.5	13.5	10.4	76.034	0	69.914	218000000	38	3.23328	0.0234669	0.923213	0.809834	C9JR56;Q9UPW6	C9JR56;Q9UPW6	DNA-binding protein SATB;DNA-binding protein SATB2	SATB2	563
21.7594	21.5685	21.6276	21.391	22.6497	22.6606	22.0359	22.8708	+	LFQ intensity LSD1_LFQ intensity NLS	7	7	7	21.5	21.5	21.5	39.646	0	60.53	364000000	95	2.5867	0.0236528	0.967625	0.809279	Q3ZCQ8;M0R0C3;M0R2F8;M0R047;M0QXC3;M0R2Z3;M0R303;M0R2D2;M0R1Y4;M0R003	Q3ZCQ8;M0R0C3;M0R2F8	Mitochondrial import inner membrane translocase subunit TIM50	TIMM50	2782	+
17.8076	17.7961	19.4714	18.1475	19.5638	19.6523	19.1357	19.4339	+	LFQ intensity LSD1_LFQ intensity NLS	5	5	2	14.8	14.8	8.1	47.314	0	9.3805	100000000	19	1.4856	0.024	1.14077	0.807482	P57073	P57073	Transcription factor SOX-8	SOX8	2244
19.0612	19.0691	18.4087	18.68	19.9068	19.9272	19.4676	19.7586	+	LFQ intensity LSD1_LFQ intensity NLS	4	4	4	14	14	14	48.349	0	32.707	67800000	24	2.60976	0.0243126	0.960313	0.80555	O75616;K7EQJ8;J3QSB2;J3QRV9;J3QT61	O75616;K7EQJ8;J3QSB2;J3QRV9	GTPase Era, mitochondrial	ERAL1	1511
24.7389	24.867	24.5045	24.3376	25.772	25.4769	25.3307	25.5696	+	LFQ intensity LSD1_LFQ intensity NLS	59	59	1	47.1	47.1	1	207.62	0	323.31	3370000000	531	3.07709	0.0244026	0.925341	0.804549	J3KN01	J3KN01		MLLT4	1160
20.4066	19.6186	20.8876	20.0292	21.0493	21.4775	21.4775	21.0951	+	LFQ intensity LSD1_LFQ intensity NLS	18	18	17	17.9	17.9	17.9	156.27	0	66.484	212000000	38	1.90523	0.0247324	1.03933	0.802682	Q86UP2;G3V4Y7;B7Z6P3;G3V5P0;H0YJP2;H0YJZ8;G3V5G2;H0YJV5	Q86UP2;G3V4Y7	Kinectin	KTN1	3107
18.3513	19.5537	18.8506	18.0593	19.8484	19.4775	19.9882	19.8097	+	LFQ intensity LSD1_LFQ intensity NLS	4	4	3	28.1	28.1	23.3	22.81	0	13.566	71300000	18	1.69054	0.0248322	1.07722	0.80124	Q4VC05	Q4VC05	B-cell CLL/lymphoma 7 protein family member A	BCL7A	2789
22.1363	21.9637	21.3045	21.9243	22.9024	22.58	22.6096	23.1253	+	LFQ intensity LSD1_LFQ intensity NLS	38	37	37	29.8	29.3	29.3	242.96	0	323.31	943000000	163	2.31969	0.0255821	0.972143	0.794781	Q5JSZ5;Q5JSZ9;H0Y412;Q5JT00	Q5JSZ5	Protein PRRC2B	PRRC2B	2820
22.3672	22.8269	22.5938	22.1825	22.8576	23.6649	23.8576	23.5869	+	LFQ intensity LSD1_LFQ intensity NLS	37	37	37	27.4	27.4	27.4	212.67	0	188.21	1330000000	295	2.0718	0.0259012	0.999152	0.79321	P21675;Q8IZX4;H0Y9L7;H7BY98;H7C2K9;H0Y8N6	P21675;Q8IZX4	Transcription initiation factor TFIID subunit 1;Transcription initiation factor TFIID subunit 1-like	TAF1;TAF1L	1842
22.4066	22.9024	22.4849	22.7327	23.1503	23.417	23.8858	23.9495	+	LFQ intensity LSD1_LFQ intensity NLS	24	24	24	31.2	31.2	31.2	133.06	0	131	886000000	221	2.31716	0.0259963	0.968967	0.792479	C9J2Y9;P30876;C9J4M6;C9JMN3;C9JZW8	C9J2Y9;P30876;C9J4M6	DNA-directed RNA polymerase;DNA-directed RNA polymerase II subunit RPB2	POLR2B	521	+
22.0625	23.0002	22.9459	23.4676	23.4425	23.895	24.2096	24.1719	+	LFQ intensity LSD1_LFQ intensity NLS	66	55	53	31.5	28.4	27.8	335.92	0	306.17	1370000000	339	1.67379	0.0262804	1.06068	0.790096	Q9P2D1	Q9P2D1	Chromodomain-helicase-DNA-binding protein 7	CHD7	4133
25.5696	25.2821	25.0233	25.3477	26.3612	26.2785	26.0317	26.1234	+	LFQ intensity LSD1_LFQ intensity NLS	38	38	35	50.1	50.1	45.8	96.864	0	323.31	4280000000	618	3.24381	0.0267407	0.893019	0.78693	Q92598;A0A0A0MSM0;R4GN69;Q5TBM3	Q92598;A0A0A0MSM0	Heat shock protein 105 kDa	HSPH1	3403
19.4066	18.6453	18.5628	18.2697	19.1605	19.9459	19.7876	20.1457	+	LFQ intensity LSD1_LFQ intensity NLS	5	5	5	6.9	6.9	6.9	106.83	0	92.377	49200000	24	1.74212	0.0268624	1.03882	0.785507	Q9NVH2;A0A087WXK3;A0A087WYC2	Q9NVH2	Integrator complex subunit 7	INTS7	4047
20.1332	20.0951	20.3645	20.8727	21.7307	21.1079	20.8034	21.9951	+	LFQ intensity LSD1_LFQ intensity NLS	9	7	7	20.2	17.9	17.9	80.595	0	11.788	179000000	24	1.72085	0.0268376	1.04289	0.785484	Q9NRL3;F5GYK2;M0R317;M0R0P4;M0R0W8;M0QXN2;M0R2A7;M0QYS2;R4GN16;M0QZM0	Q9NRL3;F5GYK2	Striatin-4	STRN4	4005
18.0072	17.1058	19.174	22.3211	21.1143	21.0493	20.4375	20.7553	+	LFQ intensity LSD1_LFQ intensity NLS	6	6	3	16.5	16.5	9.2	62.495	0	10.557	184000000	20	0.716116	0.0269751	1.68704	0.785203	O60907;Q9BQ87;C9JP56;A0A0D9SFI2;C9J5F9	O60907	F-box-like/WD repeat-containing protein TBL1X	TBL1X	1460
18.1021	18.1786	19.203	18.5071	19.0074	19.4456	20.2989	19.5223	+	LFQ intensity LSD1_LFQ intensity NLS	3	3	3	8.9	8.9	8.9	62.924	0	8.2414	42000000	18	1.57081	0.0271823	1.07085	0.783031	O15270;H0YJV2	O15270;H0YJV2	Serine palmitoyltransferase 2	SPTLC2	1361
19.9882	17.5506	20.1581	19.0712	20.5165	20.3211	20.4576	20.4775	+	LFQ intensity LSD1_LFQ intensity NLS	5	5	5	14.1	14.1	14.1	50.519	0	24.11	75100000	15	1.08877	0.0272162	1.25121	0.782763	Q9HD26;F5H1Y4	Q9HD26;F5H1Y4	Golgi-associated PDZ and coiled-coil motif-containing protein	GOPC	3963
24.1015	24.2463	24.1719	23.6649	24.7995	24.8717	25.1293	24.9803	+	LFQ intensity LSD1_LFQ intensity NLS	23	23	23	46.4	46.4	46.4	82.562	0	242.55	2040000000	250	3.03029	0.0272794	0.89906	0.782549	Q15003;E9PHA2;C9J470;C9JZP1;H7C415	Q15003;E9PHA2;C9J470	Condensin complex subunit 2	NCAPH	2650
18.0354	13.3443	16.786	17.417	18.7919	16.9202	18.4475	18.0596	+	LFQ intensity LSD1_LFQ intensity NLS	29	29	29	46.5	46.5	46.5	58.044	0	323.31	43600000000	424	0.719827	0.0275046	1.65912	0.780866	Q15696;Q15695;A6NDW0	Q15696	U2 small nuclear ribonucleoprotein auxiliary factor 35 kDa subunit-related protein 2	ZRSR2	2714
18.7039	18.8428	19.68	18.7923	20.1457	19.2442	20.4874	20.3645	+	LFQ intensity LSD1_LFQ intensity NLS	2	2	2	12.6	12.6	12.6	19.77	0	34.76	79600000	33	1.57591	0.0284594	1.05571	0.77554	F5H5N1;A0A087WXF6;A0A087WTI3;F5GXJ1;O75251	F5H5N1;A0A087WXF6;A0A087WTI3;F5GXJ1;O75251	NADH dehydrogenase [ubiquinone] iron-sulfur protein 7, mitochondrial	NDUFS7	29
20.9171	20.4775	20.3101	18.4141	20.9098	21.1703	21.1332	21.8307	+	LFQ intensity LSD1_LFQ intensity NLS	9	9	9	20.6	20.6	20.6	63.887	0	19.703	167000000	43	1.09073	0.0284699	1.23131	0.775376	O00311;B1AMW7	O00311	Cell division cycle 7-related protein kinase	CDC7	1289
20.343	21.4476	19.6835	20.1946	20.9316	21.5869	21.8152	21.7098	+	LFQ intensity LSD1_LFQ intensity NLS	16	16	16	24	24	24	111.83	0	70.39	239000000	68	1.38893	0.0294529	1.0937	0.769576	P54198	P54198	Protein HIRA	HIRA	2208
17.5281	19.4313	18.3558	19.6435	20.1825	19.8906	19.7089	19.8018	+	LFQ intensity LSD1_LFQ intensity NLS	5	5	5	9.5	9.5	9.5	120.74	0	24.644	57200000	16	1.21313	0.0294661	1.15628	0.769296	B7ZM87;A2RUF3;O75044;A0A075B7E9;Q5VZB4;A0A075B7B5;G5EA48;Q7Z6B7	B7ZM87;A2RUF3;O75044	SLIT-ROBO Rho GTPase-activating protein 2	SRGAP2	347
19.7089	20.2419	20.2066	20.1332	20.0821	20.9388	22.0224	21.6843	+	LFQ intensity LSD1_LFQ intensity NLS	15	15	15	13.1	13.1	13.1	217.95	0	56.485	209000000	72	1.31769	0.0299747	1.10925	0.76598	Q13129	Q13129	Zinc finger protein Rlf	RLF	2519
18.3452	19.2558	19.6186	19.0074	19.9171	19.654	20.0951	20.6627	+	LFQ intensity LSD1_LFQ intensity NLS	6	6	6	23.4	23.4	23.4	43.796	0	20.307	61600000	20	1.61379	0.0305113	1.02547	0.763558	E9PC15;Q53H12;E9PG39	E9PC15;Q53H12;E9PG39	Acylglycerol kinase, mitochondrial	AGK	727
22.9334	22.7895	22.8191	23.2492	23.417	23.632	24.1015	24.4984	+	LFQ intensity LSD1_LFQ intensity NLS	7	7	7	14.4	14.4	14.4	53.944	0	69.663	1300000000	141	1.97259	0.0305307	0.964427	0.763047	P53985;Q5T8R5;Q5T8R3	P53985;Q5T8R5	Monocarboxylate transporter 1	SLC16A1	2203
23.6757	23.5285	23.391	23.4425	24.7077	24.3778	24.2021	24.2096	+	LFQ intensity LSD1_LFQ intensity NLS	23	23	23	41.4	41.4	41.4	68.119	0	111.95	1040000000	174	3.1888	0.0305032	0.864846	0.762861	Q8TAT6;I3L283;I3L3I1;I3L281;I3L4U9	Q8TAT6	Nuclear protein localization protein 4 homolog	NPLOC4	3310
22.1642	22.7307	22.4451	22.821	23.391	23.2199	23.4676	23.6649	+	LFQ intensity LSD1_LFQ intensity NLS	23	12	10	77.4	48.7	43.9	49.857	0	195.15	800000000	140	2.66047	0.030555	0.895621	0.762205	Q9BUF5;K7ESM5;K7EL29;K7ES63;K7EN98;K7ESQ3;K7EQT3;K7EJ64;K7ERA8;K7EJZ4;K7EPE5	Q9BUF5;K7ESM5	Tubulin beta-6 chain	TUBB6	3721
21.6757	21.8191	21.823	21.1581	23.2961	22.2905	22.5754	22.2332	+	LFQ intensity LSD1_LFQ intensity NLS	10	10	10	30.8	30.8	30.8	61.945	0	40.026	374000000	69	1.82409	0.0310278	0.97984	0.759255	Q5TKA1;C9J5J4;H7C4T7;H0Y322;B1B047	Q5TKA1;C9J5J4;H7C4T7;H0Y322	Protein lin-9 homolog	LIN9	2889
18.585	19.778	18.9816	17.3351	20.1206	19.9459	19.4894	19.7602	+	LFQ intensity LSD1_LFQ intensity NLS	3	3	3	20.4	20.4	20.4	29.233	0	7.8834	64400000	13	1.15394	0.031	1.1591	0.759075	Q9BSF4;K7ENF5	Q9BSF4	Uncharacterized protein C19orf52	C19orf52	3702
20.1703	17.8782	20.2764	20.1332	20.6186	20.9742	20.7955	20.8651	+	LFQ intensity LSD1_LFQ intensity NLS	6	6	6	11.2	11.2	11.2	96.631	0	10.635	136000000	17	1.0652	0.0313662	1.19885	0.756671	Q6P3X3;H7C3A3	Q6P3X3	Tetratricopeptide repeat protein 27	TTC27	2980
22.3725	21.8764	21.5213	21.6971	22.8171	22.8365	22.5592	22.8745	+	LFQ intensity LSD1_LFQ intensity NLS	23	23	23	33.3	33.3	33.3	126.98	0	196.57	471000000	144	2.4293	0.0315027	0.905005	0.756022	B5MDQ0;Q2NKX8	B5MDQ0;Q2NKX8	DNA excision repair protein ERCC-6-like	ERCC6L	468
24.4298	24.3511	24.019	24.1642	25.1253	25.0854	25.0813	24.989	+	LFQ intensity LSD1_LFQ intensity NLS	53	53	53	43.4	43.4	43.4	145.17	0	323.31	4520000000	495	3.85194	0.0314745	0.829216	0.755889	Q96ST3;H3BP90;H3BNZ3;H3BT34;H3BQ76;H3BQ88;H3BNA0;H3BQL7;H3BMA2	Q96ST3	Paired amphipathic helix protein Sin3a	SIN3A	3628	+
20.7715	20.895	20.9812	21.1457	21.6096	21.9531	21.5961	22.0691	+	LFQ intensity LSD1_LFQ intensity NLS	13	13	13	22.7	22.7	22.7	98.008	0	53.593	244000000	68	3.00705	0.0327117	0.858588	0.750749	H7BXI1;A0A087WXU3;A0FGR8	H7BXI1;A0A087WXU3;A0FGR8	Extended synaptotagmin-2	ESYT2	95
21.2877	20.7553	21.2361	21.3266	21.6671	22.0854	21.9459	22.6475	+	LFQ intensity LSD1_LFQ intensity NLS	22	22	22	27.3	27.3	27.3	106.92	0	135.49	455000000	95	2.05113	0.0326827	0.935028	0.75068	O94906	O94906	Pre-mRNA-processing factor 6	PRPF6	1550
19.8636	18.7995	20.2302	19.5951	21.0426	20.654	20.654	20.1825	+	LFQ intensity LSD1_LFQ intensity NLS	6	6	6	18.8	18.8	18.8	50.146	0	14.763	131000000	30	1.55313	0.0328043	1.01118	0.748549	Q9UKT4	Q9UKT4	F-box only protein 5	FBXO5	4227
20.3857	20.0292	20.7389	20.5731	21.1143	21.0821	21.8689	21.3645	+	LFQ intensity LSD1_LFQ intensity NLS	19	19	19	10.2	10.2	10.2	292.28	0	92.615	205000000	39	2.09921	0.0328212	0.925718	0.748242	Q93008;O00507	Q93008	Probable ubiquitin carboxyl-terminal hydrolase FAF-X	USP9X	3442
19.025	19.2673	18.0633	19.5638	19.9459	20.002	20.0691	19.8712	+	LFQ intensity LSD1_LFQ intensity NLS	16	16	16	21.8	21.8	21.8	132.37	0	78.924	189000000	64	1.63628	0.033098	0.992195	0.747424	Q14865	Q14865	AT-rich interactive domain-containing protein 5B	ARID5B	2641
22.714	23.7182	23.0526	22.7915	24.0526	23.9225	24.019	23.9495	+	LFQ intensity LSD1_LFQ intensity NLS	36	36	36	29.4	29.4	29.4	257.75	0	149.9	1270000000	282	2.13954	0.0334709	0.916841	0.745312	I3L2J0;A0A0A0MQR4;Q96RK0;I3L135;I3L373;I3L1Q4;I3L2I4	I3L2J0;A0A0A0MQR4;Q96RK0	Protein capicua homolog	CIC	1146
18.0017	17.8276	18.3519	18.0118	18.7072	18.9686	19.2489	18.7439	+	LFQ intensity LSD1_LFQ intensity NLS	3	3	3	6.4	6.4	6.4	86.573	0	10.025	29300000	6	2.70843	0.0334414	0.868877	0.745096	Q7L8L6	Q7L8L6	FAST kinase domain-containing protein 5	FASTKD5	3049
19.3419	17.3117	19.7323	17.3651	20.002	18.4891	20.0292	20.5261	+	LFQ intensity LSD1_LFQ intensity NLS	3	3	3	3.5	3.5	3.5	105.7	0	4.0519	76000000	17	0.855991	0.0333826	1.32383	0.744973	F6WR09;Q9ULJ6;E7EWM3;A0A087X127;Q8NF64	F6WR09;Q9ULJ6;E7EWM3;A0A087X127;Q8NF64	Zinc finger MIZ domain-containing protein 1;Zinc finger MIZ domain-containing protein 2	ZMIZ1;ZMIZ2	881
23.4041	23.0105	22.7327	22.8708	24.0854	23.895	23.7796	23.7286	+	LFQ intensity LSD1_LFQ intensity NLS	32	32	32	21.5	21.5	21.5	206.93	0	155.46	1170000000	223	2.72057	0.0333814	0.867617	0.744753	A0A0A0MTH9;O14981	A0A0A0MTH9;O14981	TATA-binding protein-associated factor 172	BTAF1	245
21.6886	21.9707	21.8876	21.8839	22.6497	22.7876	22.538	22.6649	+	LFQ intensity LSD1_LFQ intensity NLS	16	16	13	19.9	19.9	17.2	140.4	0	69.049	587000000	125	4.28651	0.0334421	0.802331	0.743827	Q9NSC2;H3BSM9;H3BQ32	Q9NSC2;H3BSM9	Sal-like protein 1	SALL1	4017
23.4551	22.7161	23.3101	23.4041	24.0772	24.1642	23.8858	24.3031	+	LFQ intensity LSD1_LFQ intensity NLS	20	20	18	37.7	37.7	33.7	59.069	0	176.21	1190000000	220	2.43901	0.0334291	0.886257	0.743448	Q13596;H0YK42;H0YK43	Q13596;H0YK42	Sorting nexin-1	SNX1	2567
23.7895	24.1095	23.9134	23.8576	24.4488	24.8481	25.1565	24.6757	+	LFQ intensity LSD1_LFQ intensity NLS	22	22	18	51	51	41.7	55.102	0	225.29	18500000000	704	2.72294	0.0333706	0.864782	0.742777	Q13547;Q5TEE2;E5RK19	Q13547;Q5TEE2	Histone deacetylase 1	HDAC1	2562	+
19.1231	19.1898	17.8585	18.7015	20.4375	20.0292	19.2787	19.3321	+	LFQ intensity LSD1_LFQ intensity NLS	3	3	3	28.7	28.7	28.7	14.379	0	12.317	55300000	21	1.34981	0.0333869	1.05112	0.742587	Q5VV87;Q5VV89;O14880	Q5VV87;Q5VV89;O14880	Microsomal glutathione S-transferase 3	MGST3	1329
22.4298	22.2419	22.5754	22.8913	22.9619	23.3376	23.7995	23.6971	+	LFQ intensity LSD1_LFQ intensity NLS	38	38	38	38.9	38.9	38.9	143.23	0	206.31	808000000	195	2.09779	0.0336118	0.914386	0.740719	Q14683;G8JLG1;V9GY57;H0Y7K8;V9GYN9	Q14683;G8JLG1	Structural maintenance of chromosomes protein 1A;Structural maintenance of chromosomes protein	SMC1A	2625
25.1946	25.5869	25.2996	25.1604	25.9738	26.0955	26.189	26.2944	+	LFQ intensity LSD1_LFQ intensity NLS	36	36	28	30.6	30.6	26.7	152.22	0	323.31	7830000000	667	3.3695	0.0336104	0.827761	0.740106	O60885;M0QZD9;M0QYW0;M0R0H4	O60885;M0QZD9	Bromodomain-containing protein 4	BRD4	1459
20.3962	20.3211	19.2066	19.3365	21.391	20.3211	20.5356	21.1703	+	LFQ intensity LSD1_LFQ intensity NLS	27	16	16	12.3	8.9	8.9	326.02	0	70.26	205000000	51	1.37177	0.0336751	1.03943	0.739881	Q3L8U1;H3BTW3;A0A087WU44;J3KRH9;J3KSW5;H3BSP3	Q3L8U1;H3BTW3	Chromodomain-helicase-DNA-binding protein 9	CHD9	2774
22.9725	22.5754	22.4476	22.5961	23.6096	23.5285	23.4298	23.3511	+	LFQ intensity LSD1_LFQ intensity NLS	23	23	23	41.7	41.7	41.7	86.044	0	106.8	1160000000	195	3.22889	0.0336395	0.831887	0.738541	Q8WYQ5;C9JSD5	Q8WYQ5	Microprocessor complex subunit DGCR8	DGCR8	3389
18.9684	18.4756	17.7808	18.0363	19.2185	19.5489	18.805	19.575	+	LFQ intensity LSD1_LFQ intensity NLS	6	6	6	8.8	8.8	8.8	129.31	0	27.04	38600000	11	1.65698	0.0336866	0.97155	0.737817	A0A0A0MTP3;Q99550;H0YG46;J3KNE4;F5H798;F5H1W2;F5H2I5;F5GYP5;U3KQJ0;H0YFS3	A0A0A0MTP3;Q99550;H0YG46;J3KNE4	M-phase phosphoprotein 9	MPHOSPH9	250
20.7471	20.6096	20.9531	20.895	21.5356	21.5165	21.4923	22.0886	+	LFQ intensity LSD1_LFQ intensity NLS	16	16	16	22.3	22.3	22.3	110.52	0	36.241	235000000	62	2.71826	0.0339619	0.857048	0.736843	Q15042;C9J1R5	Q15042	Rab3 GTPase-activating protein catalytic subunit	RAB3GAP1	2660
21.2989	21.3752	21.1457	20.5165	22.0983	22.0724	21.6584	22.1079	+	LFQ intensity LSD1_LFQ intensity NLS	11	11	9	19.5	19.5	15.5	103.88	0	48.104	263000000	64	2.1618	0.0340743	0.900146	0.735757	Q2M2I8;E9PG46;A0A096LP60	Q2M2I8;E9PG46	AP2-associated protein kinase 1	AAK1	2763
23.9134	24.2463	25.2785	25.3811	25.3031	26.3477	25.2891	26.1776	+	LFQ intensity LSD1_LFQ intensity NLS	8	8	7	88.7	88.7	73.9	11.665	0	113.25	2590000000	110	1.22651	0.0341448	1.07456	0.734514	P05387;H0YDD8	P05387;H0YDD8	60S acidic ribosomal protein P2	RPLP2	1665
17.5616	18.9291	23.9043	17.1264	23.2535	22.3538	17.422	23.6431	+	LFQ intensity LSD1_LFQ intensity NLS	4	4	4	4.4	4.4	4.4	123.58	0.00052701	2.976	992000000	11	0.49194	0.0344014	2.28773	0.733069	Q8NHU6	Q8NHU6	Tudor domain-containing protein 7	TDRD7	3297
20.4775	20.895	21.0493	21.1395	21.8385	21.6971	21.5356	21.9134	+	LFQ intensity LSD1_LFQ intensity NLS	15	15	15	9.2	9.2	9.2	266.94	0	32.003	208000000	51	2.64362	0.0344798	0.85583	0.732378	A5YKK6;H3BNB1;H3BMZ2;H3BTH2;B5MDN3;H3BR89;H3BMH0	A5YKK6	CCR4-NOT transcription complex subunit 1	CNOT1	353
20.9316	20.2989	21.3321	18.4938	21.3321	21.6497	21.5404	21.3156	+	LFQ intensity LSD1_LFQ intensity NLS	5	5	5	6.8	6.8	6.8	119.94	0	50.073	184000000	32	0.967853	0.0344502	1.19535	0.732206	O15397;H0YH64	O15397	Importin-8	IPO8	1369
22.5685	22.2792	22.654	22.5869	23.2214	23.4298	23.2302	23.4298	+	LFQ intensity LSD1_LFQ intensity NLS	14	8	8	40.5	25.8	25.8	62.942	0	40.725	723000000	74	3.6651	0.0346266	0.805649	0.731201	E7EWR4;P33240;E9PID8;A0A0A0MT56	E7EWR4;P33240;E9PID8	Cleavage stimulation factor subunit 2	CSTF2	716
19.4676	19.6293	18.55	18.1986	20.1079	20.0292	19.6382	20.0559	+	LFQ intensity LSD1_LFQ intensity NLS	18	11	11	11	8.4	8.4	264.16	0	30.877	82500000	31	1.46893	0.0347238	0.996393	0.730314	Q09472	Q09472	Histone acetyltransferase p300	EP300	2472	+
25.558	25.895	25.604	25.5285	26.5609	26.4892	26.3926	26.3427	+	LFQ intensity LSD1_LFQ intensity NLS	49	49	49	53.1	53.1	53.1	156.02	0	323.31	6580000000	660	3.75402	0.0348171	0.799973	0.728944	Q5VT52	Q5VT52	Regulation of nuclear pre-mRNA domain-containing protein 2	RPRD2	2893
20.3101	20.8034	21.1457	18.1919	21.6843	21.5961	21.2764	20.8191	+	LFQ intensity LSD1_LFQ intensity NLS	10	10	10	18.8	18.8	18.8	81.957	0	60.105	198000000	23	0.902628	0.0350504	1.23119	0.728028	O14867;C9JMP6;C9IYR0;C9IYH8;M0QZP0;H7C4B6	O14867	Transcription regulator protein BACH1	BACH1	1328
21.4273	22.0156	20.9243	21.3045	22.1856	22.3457	22.1825	22.58	+	LFQ intensity LSD1_LFQ intensity NLS	9	9	9	35.4	35.4	35.4	38.926	0	78.351	378000000	88	1.99579	0.0350264	0.905518	0.72745	P61962;A0A087WWI6	P61962;A0A087WWI6	DDB1- and CUL4-associated factor 7	DCAF7	2294
18.7851	20.2877	20.8499	20.6627	19.9882	21.2361	22.4221	21.895	+	LFQ intensity LSD1_LFQ intensity NLS	8	8	8	8.8	8.8	8.8	188.91	0	29.014	186000000	55	0.89002	0.0350544	1.23896	0.727183	Q13029	Q13029	PR domain zinc finger protein 2	PRDM2	2508
21.5451	20.7223	20.8576	20.8113	21.9742	21.8727	21.5961	22.0156	+	LFQ intensity LSD1_LFQ intensity NLS	15	15	15	10.8	10.8	10.8	289.63	0	89.539	278000000	70	2.22881	0.0351096	0.880572	0.726922	A0A087X2H1;Q9ULT8;G3V4V5;H0YJP0;H0YJD4;A0A087WVU6;H0YJV8	A0A087X2H1;Q9ULT8;G3V4V5;H0YJP0	E3 ubiquitin-protein ligase HECTD1	HECTD1	169
17.351	19.4148	18.3287	18.9216	19.9601	19.6783	19.3211	19.3056	+	LFQ intensity LSD1_LFQ intensity NLS	6	4	4	13.1	10.4	10.4	85.956	0	7.863	50600000	7	1.1879	0.0359052	1.06226	0.722234	Q01826;A0A087WW22;A0A087WW75;C9JP21	Q01826	DNA-binding protein SATB1	SATB1	2411
21.1332	20.6453	20.5356	20.9601	21.3538	21.7553	21.6096	21.9916	+	LFQ intensity LSD1_LFQ intensity NLS	6	6	6	13	13	13	80.595	0	54.821	298000000	64	2.3728	0.0360371	0.859033	0.720552	Q71RC2;Q96J85;X6RLN4;Q6P4E2;F8W1Z5;Q8TBL5;A0A087WTL9	Q71RC2;Q96J85;X6RLN4	La-related protein 4	LARP4	3031
19.3983	19.3752	18.4616	19.3794	19.8361	20.1457	19.9882	20.2302	+	LFQ intensity LSD1_LFQ intensity NLS	7	4	4	8.8	6	6	154.94	0	54.115	84500000	42	1.96232	0.0362521	0.896417	0.719065	Q9UKE5	Q9UKE5	TRAF2 and NCK-interacting protein kinase	TNIK	4221
19.9742	19.8772	19.7731	17.6375	20.3962	20.1703	20.7553	20.4576	+	LFQ intensity LSD1_LFQ intensity NLS	8	8	8	17.3	17.3	17.3	58.687	0	10.143	114000000	16	1.01541	0.0363116	1.12939	0.717688	Q08209;E7ETC2;E9PPC8;E9PK68;Q5F2F8;P16298;P48454;H0YB02;Q5F2G0;H0YC26;G3V111	Q08209;E7ETC2;E9PPC8;E9PK68;Q5F2F8;P16298	Serine/threonine-protein phosphatase 2B catalytic subunit alpha isoform;Serine/threonine-protein phosphatase;Serine/threonine-protein phosphatase 2B catalytic subunit beta isoform	PPP3CA;PPP3CB	2461
24.7846	24.4488	25.0813	24.895	25.48	25.5841	25.7821	25.654	+	LFQ intensity LSD1_LFQ intensity NLS	33	33	33	53.5	53.5	53.5	75.378	0	323.31	3380000000	510	2.85562	0.0364247	0.822598	0.717067	P54136;E5RJM9;E5RH09;E5RI24	P54136	Arginine--tRNA ligase, cytoplasmic	RARS	2207
20.343	20.1703	20.6886	20.3962	21.0691	20.5261	21.8538	22.0983	+	LFQ intensity LSD1_LFQ intensity NLS	12	12	12	22.9	22.9	22.9	74.139	0	48.375	162000000	28	1.40185	0.0363943	0.987266	0.716984	P02545;Q3BDU5;Q5TCI8;H0YAB0;A0A0C4DGC5	P02545;Q3BDU5;Q5TCI8	Prelamin-A/C;Lamin-A/C	LMNA	1637
20.343	19.2764	19.004	19.6971	20.6096	20.4476	20.5545	20.417	+	LFQ intensity LSD1_LFQ intensity NLS	3	3	3	10.2	10.2	10.2	69.443	0	18.22	106000000	23	1.69894	0.0365933	0.927063	0.715881	Q9P215;Q5TIJ2	Q9P215	Pogo transposable element with KRAB domain	POGK	4126
20.9882	20.68	20.2302	20.5165	21.5404	21.4676	21.1269	21.6928	+	LFQ intensity LSD1_LFQ intensity NLS	13	13	13	15.9	15.9	15.9	126.55	0	21.99	195000000	41	2.29324	0.0370782	0.853208	0.711955	Q9Y613;H3BVE7;J3KTH7	Q9Y613	FH1/FH2 domain-containing protein 1	FHOD1	4376
25.5374	26.4892	25.7619	25.8552	26.1661	26.8858	27.2262	27.0914	+	LFQ intensity LSD1_LFQ intensity NLS	59	59	59	61.8	61.8	61.8	123.56	0	323.31	10100000000	888	1.61172	0.0372946	0.931445	0.70997	Q9H2P0;E9PQK8	Q9H2P0	Activity-dependent neuroprotector homeobox protein	ADNP	3852
24.4041	25.0732	24.7389	24.8997	25.5135	25.2785	26.0233	25.7364	+	LFQ intensity LSD1_LFQ intensity NLS	7	7	7	39.3	39.3	39.3	14.865	0	43.259	4050000000	184	2.16068	0.0379652	0.858964	0.707942	P62829;C9JD32;B9ZVP7;J3KT29;J3KTJ3	P62829;C9JD32;B9ZVP7;J3KT29	60S ribosomal protein L23	RPL23	2330
21.3045	21.6671	22.2302	22.1332	22.8499	22.2214	22.7614	23.1519	+	LFQ intensity LSD1_LFQ intensity NLS	15	15	15	43	43	43	51.156	0	209.06	402000000	113	1.70393	0.0380464	0.912408	0.707568	Q9Y230;M0R0Y3;X6R2L4;M0QXI6;M0R0Z0	Q9Y230;M0R0Y3	RuvB-like 2	RUVBL2	4288
19.8346	19.575	17.5437	17.9088	19.8965	20.1581	19.0142	20.4874	+	LFQ intensity LSD1_LFQ intensity NLS	4	4	4	12.6	12.6	12.6	66.958	0	14.713	88100000	10	0.902315	0.0381009	1.17354	0.707394	Q6UUV7;H0YK33	Q6UUV7	CREB-regulated transcription coactivator 3	CRTC3	3005
19.3921	19.6886	18.3952	18.8109	20.1079	19.6329	19.9171	20.3962	+	LFQ intensity LSD1_LFQ intensity NLS	7	7	7	23.2	23.2	23.2	58.781	0	25.189	77700000	24	1.53002	0.0380694	0.941832	0.707367	R4GND2;F6S7C4;Q8NEM7;B4E2D5;H7C5F9	R4GND2;F6S7C4;Q8NEM7;B4E2D5	Transcription factor SPT20 homolog	SUPT20H	875
19.0597	17.81	17.8124	18.7113	19.29	19.3559	18.8269	19.8081	+	LFQ intensity LSD1_LFQ intensity NLS	3	3	3	10.8	10.8	10.8	50.232	0	24.827	30800000	7	1.38114	0.0383182	0.971915	0.706225	H7BZW2;Q6P2H3	H7BZW2;Q6P2H3	Centrosomal protein of 85 kDa	CEP85	1109
24.945	24.1565	24.8336	24.9977	25.6376	25.7312	25.5754	25.3975	+	LFQ intensity LSD1_LFQ intensity NLS	14	14	5	50.2	50.2	25.7	37.031	0	218.35	3840000000	236	2.1999	0.038458	0.852206	0.705746	Q15555;K7EL66;C9JB30;Q9UPY8	Q15555;K7EL66	Microtubule-associated protein RP/EB family member 2	MAPRE2	2701
17.7776	19.9068	16.916	20.1825	19.8484	20.4576	20.002	19.6096	+	LFQ intensity LSD1_LFQ intensity NLS	9	9	9	22.7	22.7	22.7	87.882	0	64.075	75300000	20	0.773248	0.0384737	1.28366	0.705271	A0A087X0M0;Q7Z5L2	A0A087X0M0;Q7Z5L2	Coiled-coil domain-containing protein R3HCC1L	R3HCC1L	138
20.1079	20.1206	18.7757	20.0559	20.7634	21.1395	20.343	20.6714	+	LFQ intensity LSD1_LFQ intensity NLS	8	6	6	32.7	25.2	25.2	54.448	0	22.254	95100000	32	1.40072	0.0388135	0.964296	0.704652	A0A096LP25;A0A096LNZ0;Q6ZSR9	A0A096LP25;A0A096LNZ0;Q6ZSR9	Uncharacterized protein FLJ45252	AAK1	173
19.9459	19.3167	20.1079	20.0559	20.0426	20.895	20.7634	21.5545	+	LFQ intensity LSD1_LFQ intensity NLS	11	10	10	22.2	20.7	20.7	86.16	0	162.6	145000000	38	1.42537	0.0391954	0.957288	0.70391	Q9Y5V3	Q9Y5V3	Melanoma-associated antigen D1	MAGED1	4372
19.8787	20.3538	20.6364	20.1825	20.6186	21.2477	21.6627	21.0886	+	LFQ intensity LSD1_LFQ intensity NLS	15	15	15	21.8	21.8	21.8	142.93	0	42.575	153000000	40	1.80096	0.0395537	0.891566	0.703257	Q96RG2;C9J4R3;F8WEB4	Q96RG2	PAS domain-containing serine/threonine-protein kinase	PASK	3607
18.0762	19.6988	17.5119	19.03	19.6168	19.8936	19.2741	19.7667	+	LFQ intensity LSD1_LFQ intensity NLS	7	7	7	5	5	5	196.63	0	18.867	83700000	14	1.09135	0.0395213	1.05857	0.70324	Q5T200;Q5T9K0	Q5T200	Zinc finger CCCH domain-containing protein 13	ZC3H13	2857
24.1565	24.1174	24.5045	24.4105	24.9043	24.8811	25.2058	25.4984	+	LFQ intensity LSD1_LFQ intensity NLS	72	72	72	38.8	38.8	38.8	273.6	0	323.31	3160000000	622	2.50076	0.0394889	0.825153	0.703039	Q6P2Q9;I3L0J9;I3L3Z8;I3L1T8	Q6P2Q9	Pre-mRNA-processing-splicing factor 8	PRPF8	2979
21.2535	20.4476	21.6886	20.7876	21.6584	22.1079	22.2477	21.823	+	LFQ intensity LSD1_LFQ intensity NLS	8	8	8	28.2	28.2	28.2	41.738	0	21.754	236000000	42	1.63559	0.0394566	0.914941	0.702661	P53367	P53367	Arfaptin-1	ARFIP1	2195
16.9953	19.1482	18.4496	18.7955	18.9742	19.0129	19.1994	20.8423	+	LFQ intensity LSD1_LFQ intensity NLS	3	3	3	13.7	13.7	13.7	52.337	0	6.0558	47800000	13	0.902895	0.0394734	1.16005	0.70262	Q9UJW0;E5RGG1;H9KVE0	Q9UJW0	Dynactin subunit 4	DCTN4	4208
24.3645	25.0401	24.3443	24.7995	25.5315	25.5492	25.3342	25.4394	+	LFQ intensity LSD1_LFQ intensity NLS	64	64	63	39.1	39.1	38.7	270.21	0	323.31	3270000000	602	2.45829	0.0396765	0.826445	0.701868	O75376;A0A088AWL3;E7EVK1;E7EVU5;E7EW50;J3KS51;C9JAP0;J3QKP0;J3KRE4;J3KS29;J3KT44	O75376;A0A088AWL3	Nuclear receptor corepressor 1	NCOR1	1487
21.7098	22.5823	21.5638	21.7995	22.8969	22.8307	22.5189	22.9043	+	LFQ intensity LSD1_LFQ intensity NLS	7	7	3	42.1	42.1	20	32.363	0	96.591	453000000	71	1.9226	0.0397616	0.873854	0.701565	Q9NWS0;M0QYA2;M0QYF4;M0R3A4;M0R3A8;M0R0J2;M0R028;M0R2P8;M0QZM3;M0R1R3	Q9NWS0;M0QYA2;M0QYF4;M0R3A4	PIH1 domain-containing protein 1	PIH1D1	4071
23.7286	23.5404	23.1886	23.3511	24.317	24.2678	24.317	24.0772	+	LFQ intensity LSD1_LFQ intensity NLS	24	24	24	44.2	44.2	44.2	70.729	0	286.24	1420000000	265	3.05169	0.0396968	0.792613	0.701405	Q9UHB9	Q9UHB9	Signal recognition particle subunit SRP68	SRP68	4185
20.0821	19.3773	20.8034	20.2877	21.1946	21.0292	20.7955	21.2066	+	LFQ intensity LSD1_LFQ intensity NLS	8	8	8	10.4	10.4	10.4	156.75	0	8.7431	149000000	25	1.59635	0.0396906	0.918829	0.701092	Q15788;B5MCN7	Q15788;B5MCN7	Nuclear receptor coactivator 1	NCOA1	2725
19.3879	19.1482	19.5318	19.7307	20.2066	20.4676	19.9287	20.5069	+	LFQ intensity LSD1_LFQ intensity NLS	9	9	9	8.4	8.4	8.4	196.54	0	29.32	83600000	21	2.41332	0.0397463	0.827809	0.700563	Q9ULH0;E9PH70;H0Y8E4	Q9ULH0	Kinase D-interacting substrate of 220 kDa	KIDINS220	4239
18.3564	17.2965	18.3353	19.6747	20.0951	19.9601	20.7056	17.8911	+	LFQ intensity LSD1_LFQ intensity NLS	7	3	3	17.6	7.5	7.5	61.257	0	9.8293	84500000	16	0.790235	0.0399481	1.24725	0.699691	A6PW57;Q99755;A6PW58;A2A5X0	A6PW57;Q99755	Phosphatidylinositol 4-phosphate 5-kinase type-1 alpha	PIP5K1A	378
25.9066	25.9977	25.8927	25.8215	26.6181	26.5536	26.6595	26.726	+	LFQ intensity LSD1_LFQ intensity NLS	39	39	38	57.1	57.1	56.3	96.557	0	323.31	6270000000	564	5.14596	0.0401167	0.734673	0.69891	P33991;E5RG31;E5RFJ8	P33991	DNA replication licensing factor MCM4	MCM4	1961
21.8576	21.7265	22.937	18.0487	23.4298	22.2564	22.5615	22.1976	+	LFQ intensity LSD1_LFQ intensity NLS	4	4	4	54.6	54.6	54.6	13.281	0	35.876	635000000	67	0.635434	0.0401618	1.46889	0.698294	P62314;J3QLI9;J3QLR7	P62314;J3QLI9	Small nuclear ribonucleoprotein Sm D1	SNRPD1	2317
21.2933	21.417	21.7634	21.2302	22.3239	22.1976	22.019	22.343	+	LFQ intensity LSD1_LFQ intensity NLS	11	11	11	16.7	16.7	16.7	85.837	0	56.431	281000000	57	2.88369	0.0403651	0.794878	0.696992	Q8WXE1;A0A0D9SEH2;C9IZM8;F8WE08;F8WEI5	Q8WXE1;A0A0D9SEH2;C9IZM8	ATR-interacting protein	ATRIP	3380
20.6453	20.5451	20.8191	20.9243	21.6006	21.502	21.6671	21.2821	+	LFQ intensity LSD1_LFQ intensity NLS	6	6	6	17.3	17.3	17.3	50.317	0	19.599	215000000	52	3.20443	0.0405747	0.779497	0.696176	Q9P2R7;Q5T9Q5;Q5T9Q8	Q9P2R7;Q5T9Q5	Succinyl-CoA ligase [ADP-forming] subunit beta, mitochondrial	SUCLA2	4144
20.1457	21.417	22.3184	21.7265	20.9316	22.8614	23.4551	23.184	+	LFQ intensity LSD1_LFQ intensity NLS	5	5	5	23.8	23.8	23.8	35.348	0	22.809	446000000	40	0.821083	0.0405636	1.20613	0.695975	Q13155;F8W950;A8MU58;F8WCL2	Q13155;F8W950;A8MU58	Aminoacyl tRNA synthase complex-interacting multifunctional protein 2	AIMP2	2523
19.6228	17.5855	20.8876	21.2535	21.8689	20.8876	20.4874	21.3266	+	LFQ intensity LSD1_LFQ intensity NLS	8	8	8	23.5	23.5	23.5	47.463	0	30.418	122000000	22	0.725177	0.041	1.30527	0.694499	O00231;J3QRY4;J3QS13	O00231	26S proteasome non-ATPase regulatory subunit 11	PSMD11	1277
20.0156	19.7955	17.589	20.002	20.6453	20.0426	20.3857	20.8034	+	LFQ intensity LSD1_LFQ intensity NLS	8	8	3	9.9	9.9	3.7	138.75	0	55.102	98600000	33	0.930062	0.0411814	1.11873	0.693859	P20020;E7ERY9;Q16720;H0Y7S3;Q01814;F8W1V5	P20020;E7ERY9	Plasma membrane calcium-transporting ATPase 1;Calcium-transporting ATPase	ATP2B1	1829
21.8614	22.2792	22.9548	22.7755	23.1111	23.2961	23.5638	23.4041	+	LFQ intensity LSD1_LFQ intensity NLS	12	12	12	40.2	40.2	40.2	48.442	0	159.95	676000000	125	1.78701	0.0415	0.876036	0.692432	P22695;H3BRG4;H3BSJ9;H3BP04;H3BUE4;H3BUI9;A0A087WVZ4	P22695;H3BRG4;H3BSJ9;H3BP04	Cytochrome b-c1 complex subunit 2, mitochondrial	UQCRC2	1856
18.5598	19.7667	18.4453	19.2419	19.6886	20.0156	19.9316	20.0292	+	LFQ intensity LSD1_LFQ intensity NLS	5	5	5	6.2	6.2	6.2	140.65	0	25.159	65600000	12	1.54055	0.0416237	0.912838	0.691973	Q9UMZ2	Q9UMZ2	Synergin gamma	SYNRG	4255
20.8346	21.5731	20.5915	18.9683	21.8307	21.5869	21.5404	21.3156	+	LFQ intensity LSD1_LFQ intensity NLS	7	7	7	28.7	28.7	28.7	45.394	0	27.171	203000000	45	0.989261	0.0420911	1.07654	0.690472	Q6YN16	Q6YN16	Hydroxysteroid dehydrogenase-like protein 2	HSDL2	3016
20.3538	19.8727	19.7907	19.7323	20.9171	20.4972	20.7056	20.8346	+	LFQ intensity LSD1_LFQ intensity NLS	10	10	10	13.2	13.2	13.2	139.15	0	48.687	128000000	33	2.49995	0.0432861	0.801218	0.685552	F5H5V6;F5H6S1;F8W8R6;A0A087X0R0;O15550;H0Y6I7;H0Y5J3;A0A087X248;A0A096LPD8;F5H3N7;A0A087X2I9;A0A087X0Y2;F5H8B4;O14607;F5GWV3;A0A087WUN6	F5H5V6;F5H6S1;F8W8R6;A0A087X0R0;O15550;H0Y6I7;H0Y5J3	Lysine-specific demethylase 6A	KDM6A	143
21.928	22.3725	20.2877	21.1825	22.4626	22.3831	22.343	22.5777	+	LFQ intensity LSD1_LFQ intensity NLS	18	18	18	22.5	22.5	22.5	143.16	0	94.329	357000000	106	1.13864	0.0436656	0.998939	0.684432	Q15047;E9PRF4;E9PQM8;X6R732;X6RHV1;B0QZE6;E9PS59	Q15047;E9PRF4	Histone-lysine N-methyltransferase SETDB1	SETDB1	2662	+
22.2707	22.3565	21.9566	21.8727	23.0071	22.7553	22.9334	22.8519	+	LFQ intensity LSD1_LFQ intensity NLS	20	20	20	31.8	31.8	31.8	102.91	0	99.377	359000000	122	3.00175	0.0438854	0.772795	0.684138	O60502;H7C3X0	O60502	Protein O-GlcNAcase	MGEA5	1438
20.3101	20.7955	21.2477	21.1581	21.6364	21.714	21.7876	21.6928	+	LFQ intensity LSD1_LFQ intensity NLS	7	7	6	24.4	24.4	20.3	33.637	0	21.47	202000000	33	2.07499	0.044197	0.829863	0.682853	Q96C36;A0A087WTV6;J3KR12;A0A087WZR9;A0A087WX69;A0A087WZF0	Q96C36;A0A087WTV6;J3KR12;A0A087WZR9	Pyrroline-5-carboxylate reductase 2;Pyrroline-5-carboxylate reductase	PYCR2	3485
20.9812	20.7471	20.2419	21.2125	21.5165	21.7307	21.4775	21.7955	+	LFQ intensity LSD1_LFQ intensity NLS	14	14	14	14.3	14.3	14.3	143.19	0	74.254	223000000	51	2.02704	0.0441619	0.834363	0.682845	O14976;D6RAW3;D6RF16;D6RC24;D6RAQ7;D6RE78;A0A087X1U9	O14976	Cyclin-G-associated kinase	GAK	1338
18.0382	17.5665	18.822	17.549	17.77	20.4874	18.7039	19.5204	+	LFQ intensity LSD1_LFQ intensity NLS	3	3	3	13.8	13.8	13.8	42.514	0	6.0268	50300000	9	0.871112	0.0442506	1.12648	0.682078	F5GZK9;Q8IZD4	F5GZK9;Q8IZD4	mRNA-decapping enzyme 1B	DCP1B	838
20.0691	20.9882	19.8315	19.9287	20.5356	21.2244	21.2821	21.3962	+	LFQ intensity LSD1_LFQ intensity NLS	11	11	8	21.8	21.8	16	77.846	0	40.938	158000000	41	1.4765	0.0444818	0.905218	0.680916	Q96S59;R4GNA3	Q96S59	Ran-binding protein 9	RANBP9	3619
19.6662	18.2193	19.4334	20.417	20.2302	20.417	20.0292	21.2066	+	LFQ intensity LSD1_LFQ intensity NLS	8	8	8	25.3	25.3	25.3	57.571	0	45.431	98200000	20	1.02167	0.0447284	1.03677	0.680365	E9PN76;Q8ND24;E9PRE9	E9PN76;Q8ND24	RING finger protein 214	RNF214	791
19.9601	20.2066	22.0359	20.1581	21.3266	21.4726	21.6757	21.9812	+	LFQ intensity LSD1_LFQ intensity NLS	10	10	10	16.3	16.3	16.3	102.35	0	40.607	205000000	44	1.05035	0.0446577	1.02386	0.680238	Q92973;A0A075B780;O14787;E7EW37;K7ENW1;K7ESC1;S4R398	Q92973	Transportin-1	TNPO1	3435
19.163	19.503	19.0184	19.4795	20.1206	20.0156	19.64	20.8876	+	LFQ intensity LSD1_LFQ intensity NLS	11	11	10	21.7	21.7	20.7	88.583	0	31.906	120000000	28	1.6427	0.0447204	0.874992	0.679496	Q9Y4W6;K7EP56	Q9Y4W6	AFG3-like protein 2	AFG3L2	4352
25.8528	26.8623	26.1661	26.0062	27.1015	27.2714	27.0914	26.8019	+	LFQ intensity LSD1_LFQ intensity NLS	19	19	19	41.2	41.2	41.2	66.194	0	323.31	11400000000	390	1.87769	0.0446851	0.844694	0.679447	O94842;O15405;O94900;Q96NM4;C9J919;C9JNL1	O94842	TOX high mobility group box family member 4	TOX4	1544
21.9672	23.8093	23.239	23.4551	23.3376	24.1174	24.7129	24.3645	+	LFQ intensity LSD1_LFQ intensity NLS	48	48	48	29.3	29.3	29.3	268.84	0	220.09	1480000000	270	1.06239	0.0449803	1.01546	0.678732	Q5VWN6;J3KPH3	Q5VWN6	Protein FAM208B	FAM208B	2905
17.9882	20.0821	20.1079	20.002	19.654	20.1825	21.2933	21.6627	+	LFQ intensity LSD1_LFQ intensity NLS	15	15	15	17.5	17.5	17.5	144.75	0	111.44	170000000	54	0.822318	0.045074	1.15313	0.678343	Q13045;J3KS54;K7EQZ7;K7EP37;K7EP27;J3QLR6;J3QQQ2;J3KS39;J3QQU5	Q13045	Protein flightless-1 homolog	FLII	2512
23.4298	23.417	22.7512	23.1457	24.3239	24.0359	24.0772	23.6096	+	LFQ intensity LSD1_LFQ intensity NLS	30	30	4	41.1	41.1	6.7	122.49	0	323.31	1010000000	259	2.04591	0.0451235	0.825734	0.678245	Q96RU2;F5GZ74;F5H6Q3;F5H2G4	Q96RU2	Ubiquitin carboxyl-terminal hydrolase 28	USP28	3615	+
24.3376	24.5045	24.0526	24.2678	24.9495	24.9716	25.065	25.1795	+	LFQ intensity LSD1_LFQ intensity NLS	24	22	22	51.3	47.7	47.7	65.26	0	259.07	3550000000	319	3.373	0.0450881	0.750771	0.678044	Q8WXI9	Q8WXI9	Transcriptional repressor p66-beta	GATAD2B	3382
20.4066	20.1581	19.8995	20.1457	20.9531	20.9316	20.8269	20.895	+	LFQ intensity LSD1_LFQ intensity NLS	25	5	3	74.1	14.4	10.1	49.585	0	211.04	168000000	51	3.36957	0.0456025	0.749158	0.676632	P04350;M0R2D3;M0R278;I3L2F9;A6NNZ2;M0QY85;M0R0X0;M0QY37;M0QX14;M0QZL7;M0QYM7;M0R042;CON__ENSEMBL:ENSBTAP00000025008;M0R1I1;M0R2T4;A0A075B724	P04350	Tubulin beta-4A chain	TUBB4A	1649
25.7077	25.2961	25.2856	25.4769	26.2225	26.2317	26.038	26.2838	+	LFQ intensity LSD1_LFQ intensity NLS	36	36	36	63.4	63.4	63.4	63.541	0	323.31	4850000000	580	3.26397	0.0457049	0.752426	0.67627	P46060;H0Y4Q3;B0QYT5;B0QYT4;B0QYT6	P46060	Ran GTPase-activating protein 1	RANGAP1	2065
21.2302	20.9882	20.9243	20.8576	21.4526	21.9061	21.6886	22.0886	+	LFQ intensity LSD1_LFQ intensity NLS	16	16	16	18.2	18.2	18.2	136.85	0	114.47	262000000	90	2.57166	0.0457129	0.783909	0.676001	H9KV28;O60610;E5RJ79;B4E2I7	H9KV28;O60610	Protein diaphanous homolog 1	DIAPH1	1132
20.393	19.616	18.3513	18.6952	19.5108	20.1332	21.654	20.2066	+	LFQ intensity LSD1_LFQ intensity NLS	10	7	7	8.2	6	6	195.74	0	17.712	59100000	12	0.865053	0.0460658	1.11226	0.675286	F5H1F7;P29375;E7EV89	F5H1F7;P29375	Lysine-specific demethylase 5A	KDM5A	846
22.5093	21.9061	21.3805	20.7876	22.5638	22.5475	22.3805	22.8132	+	LFQ intensity LSD1_LFQ intensity NLS	14	14	14	31.9	31.9	31.9	65.582	0	79.648	562000000	109	1.30902	0.0460799	0.930392	0.675109	Q9BRS2;E9PFQ8	Q9BRS2	Serine/threonine-protein kinase RIO1	RIOK1	3695
21.0821	21.2593	21.0224	21.5592	21.9352	22.2877	21.9742	21.8346	+	LFQ intensity LSD1_LFQ intensity NLS	10	9	9	45.2	42.5	42.5	33.304	0	26.628	256000000	61	2.61419	0.0465969	0.77718	0.672787	Q00535	Q00535	Cyclin-dependent-like kinase 5	CDK5	2392
21.3211	20.002	20.7223	21.1269	21.7876	21.743	21.2185	22.0156	+	LFQ intensity LSD1_LFQ intensity NLS	22	22	22	16.1	16.1	16.1	218.68	0	75.377	255000000	75	1.42908	0.0469984	0.898082	0.671773	Q9UPY3;H0YJZ6	Q9UPY3	Endoribonuclease Dicer	DICER1	4275
23.6096	22.9189	23.417	23.7389	24.1795	24.4234	24.1795	24.0935	+	LFQ intensity LSD1_LFQ intensity NLS	25	25	25	44.2	44.2	44.2	104.82	0	134.19	2760000000	293	2.20772	0.0478722	0.797855	0.668482	Q12872;F5H1A5;H0YFR9	Q12872	Splicing factor, suppressor of white-apricot homolog	SFSWAP	2490
18.9573	18.4696	18.9286	18.2301	19.5545	19.6024	19.6937	19.0211	+	LFQ intensity LSD1_LFQ intensity NLS	3	3	3	9	9	9	62.889	0	200.33	50000000	13	1.8976	0.0489681	0.82153	0.665745	Q8WY91	Q8WY91	THAP domain-containing protein 4	THAP4	3386
24.1015	24.4041	25.002	24.6209	24.8044	25.2058	25.7338	25.8741	+	LFQ intensity LSD1_LFQ intensity NLS	7	7	7	59.2	59.2	59.2	14.839	0	35.027	3410000000	158	1.51049	0.0489705	0.872423	0.665578	P62244;I3L3P7;I3L246;H3BN98;H3BV27;H3BT37;I3L303;H3BVC7	P62244;I3L3P7;I3L246;H3BN98	40S ribosomal protein S15a	RPS15A	2305
24.0854	24.2821	23.7286	23.867	24.6595	24.9134	24.7024	24.7024	+	LFQ intensity LSD1_LFQ intensity NLS	44	44	44	23.2	23.2	23.2	284.52	0	264.81	2710000000	417	2.86081	0.0493551	0.753664	0.664299	Q15652;H7BXU7	Q15652	Probable JmjC domain-containing histone demethylation protein 2C	JMJD1C	2710
22.8576	22.6907	22.3592	22.4676	23.5285	23.5045	23.2477	23.1395	+	LFQ intensity LSD1_LFQ intensity NLS	22	22	22	19.3	19.3	19.3	218.4	0	165.07	667000000	149	2.68239	0.0494161	0.761262	0.663528	O60318	O60318	Germinal-center associated nuclear protein	MCM3AP	1433

## Sheet: LSD1 S0=2
LFQ intensity NLS-03	LFQ intensity NLS-02	LFQ intensity NLS-01r	LFQ intensity NLS-01	LFQ intensity LSD1-04	LFQ intensity LSD1-03	LFQ intensity LSD1-02	LFQ intensity LSD1-01	Student's T-test Significant LFQ intensity LSD1_LFQ intensity NLS	Student's T-test significant	Peptides	Razor + unique peptides	Unique peptides	Sequence coverage [%]	Unique + razor sequence coverage [%]	Unique sequence coverage [%]	Mol. weight [kDa]	Q-value	Score	Intensity	MS/MS count	-Log Student's T-test p-value LFQ intensity LSD1_LFQ intensity NLS	Student's T-test q-value LFQ intensity LSD1_LFQ intensity NLS	Student's T-test Difference LFQ intensity LSD1_LFQ intensity NLS	Student's T-test Test statistic LFQ intensity LSD1_LFQ intensity NLS	Protein IDs	Majority protein IDs	Protein names	Gene names	id	Known interactor
21.0292	21.4118	24.4676	21.4273	32.3436	32.5458	32.2393	32.4334	+	LFQ intensity LSD1_LFQ intensity NLS	54	54	54	75.9	75.9	75.9	92.902	0	323.31	133000000000	1398	4.86341	0	10.3066	3.67761	O60341;R4GMQ1;R4GMP9	O60341	Lysine-specific histone demethylase 1A	KDM1A	1434	+
17.566	17.9986	19.1237	16.9168	26.0169	26.0995	25.9043	26.2571	+	LFQ intensity LSD1_LFQ intensity NLS	32	23	23	52.3	40.4	40.4	71.027	0	99.345	2600000000	215	5.63288	0	8.16815	3.30684	P17066;P48741	P17066	Heat shock 70 kDa protein 6	HSPA6	1796
15.5951	18.5878	15.768	16.1317	24.558	24.945	25.4769	23.9495	+	LFQ intensity LSD1_LFQ intensity NLS	27	27	27	61.1	61.1	61.1	59.403	0	305.86	2350000000	310	4.40126	0	8.2117	2.96592	E9PDR0;P05166;C9JQS9;E7EX59;E7ETT1;E7ETT4;E7EUY3;E9PEC3;F8WBI9;E7ENC1;H7C5C9;C9JVW9;C9JAW3;C9JVY9	E9PDR0;P05166;C9JQS9;E7EX59;E7ETT1;E7ETT4;E7EUY3;E9PEC3;F8WBI9	Propionyl-CoA carboxylase beta chain, mitochondrial	PCCB	735
19.8515	18.8238	18.7764	19.0951	27.1115	26.5344	26.8264	25.0148	+	LFQ intensity LSD1_LFQ intensity NLS	98	81	80	45.6	39.5	38.4	276.54	0	323.31	6710000000	908	5.02111	0	7.23511	2.8605	O00763;F8W8T8;H0YGH5;A0A087WUA1	O00763	Acetyl-CoA carboxylase 2;Biotin carboxylase	ACACB	1306
17.977	17.6168	18.6382	17.5878	24.0526	24.8764	24.7492	23.8858	+	LFQ intensity LSD1_LFQ intensity NLS	37	37	37	51.2	51.2	51.2	115.27	0	323.31	1330000000	253	5.79549	0	6.43602	2.7415	O75362;Q9BZ31;A2A326	O75362	Zinc finger protein 217	ZNF217	1483	+
16.8238	18.4933	15.0617	19.0619	23.7077	24.2961	25.1946	24.7441	+	LFQ intensity LSD1_LFQ intensity NLS	22	16	16	53.7	43.8	43.8	55.581	0	192.37	1040000000	138	3.52257	0	7.12546	2.41073	Q9P2K3;B4DV59;E9PQE5;H0YF22;E9PR63;H0YDR8;H0YDD7;E9PPC5	Q9P2K3;B4DV59	REST corepressor 3	RCOR3	4139	+
16.9431	18.265	17.2512	18.1946	23.9043	23.5983	23.48	22.6671	+	LFQ intensity LSD1_LFQ intensity NLS	26	26	25	43.6	43.6	42.6	98.14	0	258.25	720000000	150	4.99356	0	5.74896	2.37052	Q9UHJ3;C9IY64	Q9UHJ3	Scm-like with four MBT domains protein 1	SFMBT1	4191
18.8995	18.963	20.8651	18.7731	24.0359	25.4831	25.2891	24.5404	+	LFQ intensity LSD1_LFQ intensity NLS	34	34	34	41.4	41.4	41.4	110.04	0	204.47	1000000000	149	4.00273	0	5.46194	2.10017	Q9P0K7;D6RE17;D6RB25;D6RBW6;D6RB27;D6R9G4;D6RBY4;D6REL2;D6R9G6;D6RF74	Q9P0K7	Ankycorbin	RAI14	4118
25.8834	26.1795	26.2714	26.1719	31.1177	30.7373	31.0349	29.995	+	LFQ intensity LSD1_LFQ intensity NLS	54	54	54	69.6	69.6	69.6	80.058	0	323.31	135000000000	2151	5.58909	0	4.59465	2.02498	P05165;H0Y5U0;Q5JTW6;Q5JVH2;H0Y4B9;H0Y798	P05165	Propionyl-CoA carboxylase alpha chain, mitochondrial	PCCA	1662
26.038	25.7208	26.0275	26.1871	30.9539	30.7373	31.1361	29.8188	+	LFQ intensity LSD1_LFQ intensity NLS	42	42	42	64.8	64.8	64.8	80.472	0	323.31	134000000000	2346	5.27998	0	4.66821	2.02223	Q96RQ3;E9PHF7;E9PG35;F5GYT8;G5E9X5;F8WDI3	Q96RQ3;E9PHF7;E9PG35;F5GYT8;G5E9X5	Methylcrotonoyl-CoA carboxylase subunit alpha, mitochondrial	MCCC1	3610
20.4375	19.8832	19.8965	19.1605	23.8764	24.5638	25.002	24.217	+	LFQ intensity LSD1_LFQ intensity NLS	39	39	39	42.6	42.6	42.6	124.29	0	201.56	1540000000	251	4.86356	0	4.57038	1.94001	Q92618;A0A087WUJ4;F5H2K2	Q92618;A0A087WUJ4	Zinc finger protein 516	ZNF516	3408	+
26.509	26.8385	26.6181	26.6458	30.9677	30.9882	31.2979	30.4032	+	LFQ intensity LSD1_LFQ intensity NLS	65	65	65	66.3	66.3	66.3	129.63	0	323.31	153000000000	2250	6.17563	0	4.26144	1.9383	P11498;E9PRE7;E9PS68	P11498	Pyruvate carboxylase, mitochondrial	PC	1738
21.6627	22.2961	21.0951	20.9098	25.4923	26.3307	26.5448	25.8997	+	LFQ intensity LSD1_LFQ intensity NLS	40	40	40	51.5	51.5	51.5	136.16	0	323.31	3440000000	362	4.63358	0	4.57594	1.91434	Q14687;H0Y613;H7C3B5;C9JLW9	Q14687;H0Y613	Genetic suppressor element 1	GSE1	2628	+
17.9937	19.3273	17.8269	19.0249	21.7223	23.4551	23.9584	23.8191	+	LFQ intensity LSD1_LFQ intensity NLS	14	14	14	14.2	14.2	14.2	183.09	0	40.849	301000000	46	3.49708	0	4.69554	1.78091	Q8TDY2	Q8TDY2	RB1-inducible coiled-coil protein 1	RB1CC1	3331
20.3962	20.4576	18.1357	18.0255	23.8385	24.1871	23.6649	24.5105	+	LFQ intensity LSD1_LFQ intensity NLS	20	20	19	33.8	33.8	33.1	125.61	0	232.9	647000000	121	3.31163	0	4.79645	1.77424	Q13625;H7C5L8	Q13625	Apoptosis-stimulating of p53 protein 2	TP53BP2	2570
18.9171	19.3343	22.6386	18.0691	24.7695	25.1604	25.0894	25.1833	+	LFQ intensity LSD1_LFQ intensity NLS	35	35	28	43	43	37.9	128.47	0	199.04	1280000000	182	2.72878	0	5.31088	1.76672	X6RLX0;Q8IUD2;G8JLD3;X6RM00;K7EPP6;K7EPD6;K7EP25;K7EIZ7;K7EKH8	X6RLX0;Q8IUD2;G8JLD3;X6RM00	ELKS/Rab6-interacting/CAST family member 1	ERC1	3143
19.185	20.9098	22.3752	19.3879	24.8433	25.141	25.7543	25.6513	+	LFQ intensity LSD1_LFQ intensity NLS	53	53	47	85.4	85.4	77.1	53.327	0	323.31	84800000000	1276	3.12897	0	4.88303	1.75991	J3KN32;Q9UKL0;H0YNY4	J3KN32;Q9UKL0	REST corepressor 1	RCOR1	1163	+
28.6697	27.6251	27.6181	27.4785	32.6307	32.5934	32.4007	31.0217	+	LFQ intensity LSD1_LFQ intensity NLS	169	169	145	74.3	74.3	64.8	265.55	0	323.31	354000000000	5379	4.01357	0	4.3138	1.74482	Q13085;Q59FY4;A0A0C4DGT1;A0A087WWN5;A0A087X2F8;A0A087WYS8	Q13085	Acetyl-CoA carboxylase 1;Biotin carboxylase	ACACA	2514
17.8161	18.0211	18.4757	18.3652	21.6714	21.7634	22.2302	21.8307	+	LFQ intensity LSD1_LFQ intensity NLS	12	12	12	40.4	40.4	40.4	35.812	0	177.51	659000000	70	5.84841	0	3.70444	1.6869	Q9P0W2;B5MDG7;K7EJR8;C9J8X5;C9JQA7;C9K049;F8WES5	Q9P0W2;B5MDG7;K7EJR8	SWI/SNF-related matrix-associated actin-dependent regulator of chromatin subfamily E member 1-related	HMG20B	4123	+
18.9344	18.265	19.4496	18.4736	22.2961	22.7327	22.9864	22.6209	+	LFQ intensity LSD1_LFQ intensity NLS	46	46	46	31.3	31.3	31.3	221.36	0	323.31	905000000	205	4.88349	0	3.87838	1.68655	A0A087WTW5;Q9UKL3;A0A096LP21	A0A087WTW5;Q9UKL3	CASP8-associated protein 2	CASP8AP2	34
18.3321	17.227	19.8438	19.8515	22.8932	23.2821	23.2229	23.3511	+	LFQ intensity LSD1_LFQ intensity NLS	16	16	16	37.3	37.3	37.3	69.239	0	112.96	363000000	57	3.29401	0	4.37371	1.65281	Q96LB3;E5RIF0;E5RH29;E5RGX6;E5RJK3	Q96LB3	Intraflagellar transport protein 74 homolog	IFT74	3578
20.2185	20.5069	19.3101	19.8861	23.9495	23.6865	23.5285	23.6649	+	LFQ intensity LSD1_LFQ intensity NLS	31	31	31	24.2	24.2	24.2	232.76	0	139.38	624000000	111	5.03142	0	3.72696	1.64071	Q96BY7;H7C3T2;Q2TAZ0	Q96BY7	Autophagy-related protein 2 homolog B	ATG2B	3481
18.4153	17.5645	17.497	18.1822	21.1886	22.4066	21.4626	21.7836	+	LFQ intensity LSD1_LFQ intensity NLS	3	3	3	7.2	7.2	7.2	86.082	0	13.368	128000000	8	4.46177	0	3.79561	1.61737	Q96II8;E9PD99	Q96II8;E9PD99	Leucine-rich repeat and calponin homology domain-containing protein 3	LRCH3	3552
20.4676	19.8802	18.9402	19.4894	23.0493	23.4676	23.2821	23.3376	+	LFQ intensity LSD1_LFQ intensity NLS	25	25	25	32.7	32.7	32.7	102.28	0	108.86	662000000	150	4.41988	0	3.58979	1.53835	A0A087X211;Q8TCG1;F8WF26;F8WAX6	A0A087X211;Q8TCG1	Protein CIP2A	KIAA1524	161
20.8876	21.895	21.5213	21.502	24.2607	24.8764	25.6458	25.3645	+	LFQ intensity LSD1_LFQ intensity NLS	44	44	44	40.6	40.6	40.6	181.42	0	323.31	2170000000	377	4.17016	0	3.58536	1.51384	Q92766;C9JU34;A0A087X055;C9JPJ6;C9JE09	Q92766;C9JU34	Ras-responsive element-binding protein 1	RREB1	3418	+
19.4148	19.3288	18.023	19.0975	23.2678	22.8288	22.4501	21.9316	+	LFQ intensity LSD1_LFQ intensity NLS	15	15	15	30.5	30.5	30.5	78.893	0	41.661	331000000	60	3.84446	0	3.65354	1.5043	Q8IUZ0;H0YKE9;H0YNV5;H0YM43;H0YMZ6;H0YMT2;A0A0B4J283;H0YNI5;H0YLZ6;H0YKI5;H0YLQ8;H0YKQ0	Q8IUZ0	Leucine-rich repeat-containing protein 49	LRRC49	3145
18.6132	18.2597	18.849	18.3098	21.8346	21.6006	21.7182	21.6714	+	LFQ intensity LSD1_LFQ intensity NLS	6	6	6	21.5	21.5	21.5	44.139	0	46.031	128000000	32	6.2206	0	3.19826	1.49004	Q9C0F1;D6RGX6;D6RBX1;D6RC25	Q9C0F1;D6RGX6	Centrosomal protein of 44 kDa	CEP44	3808
20.9098	22.1238	22.714	20.9812	26.7518	25.0233	25.2133	24.7746	+	LFQ intensity LSD1_LFQ intensity NLS	52	52	40	73.5	73.5	61.5	74.853	0	323.31	62200000000	709	3.00909	0	3.75853	1.43006	Q96BD5;E9PLU5;E9PR02;E9PS51;E9PLV4;H0YEK2;H0YCI1;E9PNW9;E9PNN4	Q96BD5	PHD finger protein 21A	PHF21A	3472	+
19.4874	19.0532	19.4476	19.719	22.4898	22.8054	22.6186	22.2273	+	LFQ intensity LSD1_LFQ intensity NLS	7	7	7	34.1	34.1	34.1	37.353	0	36.672	377000000	83	5.56213	0	3.10848	1.42336	Q9H6J7;E9PI12;E9PI28;H0YDJ0	Q9H6J7;E9PI12	UPF0705 protein C11orf49	C11orf49	3889
22.1079	21.5961	20.1703	19.0506	24.7543	24.8093	24.5165	24.1795	+	LFQ intensity LSD1_LFQ intensity NLS	35	35	35	35	35	35	133.06	0	323.31	2080000000	303	2.78245	0	3.83369	1.41527	O75182;M0QYC5;M0R271	O75182;M0QYC5	Paired amphipathic helix protein Sin3b	SIN3B	1478
18.3569	18.2164	17.7519	17.7711	21.1457	21.0886	20.8034	21.7389	+	LFQ intensity LSD1_LFQ intensity NLS	25	3	3	26.7	3.3	3.3	127.14	0	5.1567	152000000	31	4.83343	0	3.17009	1.40906	H3BU53	H3BU53		MGA	1096
18.0364	18.2001	18.9289	19.4835	21.6928	21.7471	21.9882	22.5938	+	LFQ intensity LSD1_LFQ intensity NLS	5	5	5	19.9	19.9	19.9	29.793	0	4.5595	225000000	10	3.83485	0	3.34326	1.39659	Q0PNE2;H7BZM9;C9JLH5;C9JA82;C9J2D6;C9J9N8;C9JEX8;C9IYN7;F8WE64	Q0PNE2;H7BZM9	Elongator complex protein 6	ELP6	2474
18.2466	18.4496	19.4004	18.4696	21.654	21.8385	21.8269	21.8152	+	LFQ intensity LSD1_LFQ intensity NLS	5	5	5	41	41	41	22.782	0	37.284	136000000	42	4.69504	0	3.14209	1.38935	P04792;F8WE04;C9J3N8	P04792;F8WE04	Heat shock protein beta-1	HSPB1	1652
18.1436	17.6242	19.1104	17.9794	21.8651	21.8307	21.4726	20.7715	+	LFQ intensity LSD1_LFQ intensity NLS	4	4	4	40	40	40	12.755	0	9.062	85900000	13	3.70415	0	3.27059	1.35896	A0A087WV05;Q99417;A0A0D9SEI7	A0A087WV05;Q99417	C-Myc-binding protein	MYCBP	58
17.6414	17.4977	19.6222	19.266	22.7182	22.4898	21.7553	21.2764	+	LFQ intensity LSD1_LFQ intensity NLS	30	30	30	40.7	40.7	40.7	134.42	0	323.31	478000000	103	2.84112	0	3.55307	1.34595	Q96R06;K7ELG0;F5GZT2;K7ELC8;J3KTQ0;E9PMD0;J3KSV2;J3QRV8	Q96R06	Sperm-associated antigen 5	SPAG5	3604
18.6117	17.7034	21.3376	18.6381	22.7796	22.5708	22.8633	22.9847	+	LFQ intensity LSD1_LFQ intensity NLS	6	6	6	6.9	6.9	6.9	167.35	0	15.105	357000000	12	2.48484	0	3.72689	1.3356	Q08378;A0A087WV43	Q08378	Golgin subfamily A member 3	GOLGA3	2463
24.4298	23.867	24.0443	24.0526	27.0084	26.976	27.1507	26.726	+	LFQ intensity LSD1_LFQ intensity NLS	36	36	34	43.1	43.1	41.9	118.13	0	323.31	8130000000	564	5.91565	0	2.86684	1.3348	Q9ULH7;I3L2S3;B0QY84;I3L2A0;Q8IZQ8	Q9ULH7	MKL/myocardin-like protein 2	MKL2	4240
21.8499	20.9882	21.7995	21.7955	24.4041	24.5045	24.4923	24.7234	+	LFQ intensity LSD1_LFQ intensity NLS	29	29	29	44.8	44.8	44.8	108.62	0	133.87	1180000000	195	4.97304	0	2.92278	1.3178	Q7Z4H7;Q5VY60;Q5SYF9	Q7Z4H7;Q5VY60	HAUS augmin-like complex subunit 6	HAUS6	3071	+
21.4015	21.3752	19.7504	19.7089	23.6757	23.8764	23.5285	24.019	+	LFQ intensity LSD1_LFQ intensity NLS	46	46	46	30.8	30.8	30.8	256.86	0	323.31	1040000000	206	3.21762	0	3.21593	1.29103	A0A087WW06;Q96AY4;B0QYP4;B0QYP5	A0A087WW06;Q96AY4	Tetratricopeptide repeat protein 28	TTC28	70
17.4664	17.503	18.683	17.7152	20.7955	20.68	20.7553	20.8113	+	LFQ intensity LSD1_LFQ intensity NLS	8	8	8	14	14	14	134.75	0	21.705	102000000	22	4.2772	0	2.91863	1.27608	Q9P1Y5	Q9P1Y5	Calmodulin-regulated spectrin-associated protein 3	CAMSAP3	4124
17.3158	17.3652	17.7195	19.1	20.8499	21.1457	21.2764	20.6186	+	LFQ intensity LSD1_LFQ intensity NLS	6	6	6	14	14	14	93.772	0	45.839	98700000	20	3.36807	0	3.09755	1.26769	Q96D09	Q96D09	G-protein coupled receptor-associated sorting protein 2	GPRASP2	3495
18.9044	19.0629	18.2535	19.1713	21.265	21.7876	22.58	21.6186	+	LFQ intensity LSD1_LFQ intensity NLS	10	9	9	25.4	23.9	23.9	58.011	0	44.557	168000000	36	3.85968	0	2.96478	1.2639	Q8IZ40	Q8IZ40	REST corepressor 2	RCOR2	3192	+
27.1795	27.2714	27.6998	27.189	29.6595	30.1483	30.3515	30.2535	+	LFQ intensity LSD1_LFQ intensity NLS	133	133	133	50.5	50.5	50.5	267.29	0	323.31	79500000000	2899	5.09115	0	2.7683	1.26003	P12270;Q5SWX9	P12270	Nucleoprotein TPR	TPR	1749
21.4066	20.9459	19.7273	21.5069	23.5754	24.0935	24.0105	24.002	+	LFQ intensity LSD1_LFQ intensity NLS	43	43	43	23	23	23	308.57	0	270.39	961000000	211	3.41228	0	3.02364	1.24694	E7EMW7;O95071;E7ET84;E5RFK7;H0YBB4	E7EMW7;O95071	E3 ubiquitin-protein ligase UBR5	UBR5	664
19.1053	16.962	19.2535	19.5165	21.3266	22.3045	22.2036	22.0393	+	LFQ intensity LSD1_LFQ intensity NLS	7	7	7	40.7	40.7	40.7	47.687	0	31.211	188000000	43	2.68904	0	3.25917	1.23985	Q13501;E7EMC7;E9PFW8;D6RBF1;C9J6J8;C9JRJ8;E3W990	Q13501;E7EMC7	Sequestosome-1	SQSTM1	2555
24.141	24.4676	23.7895	24.141	26.8504	27.0813	27.0813	26.4378	+	LFQ intensity LSD1_LFQ intensity NLS	66	66	54	57.5	57.5	42.2	154.91	0	323.31	9720000000	931	4.94804	0	2.72791	1.23691	Q9UBW7	Q9UBW7	Zinc finger MYM-type protein 2	ZMYM2	4165	+
21.0886	20.5731	20.4576	20.3645	23.2961	23.5522	22.937	23.417	+	LFQ intensity LSD1_LFQ intensity NLS	130	2	2	63.7	0.6	0.6	278.22	0	13.369	990000000	63	4.86317	0	2.67959	1.21322	Q60FE5;A0A087WWY3	Q60FE5;A0A087WWY3		FLNA	2915
19.8222	19.6645	20.417	18.0705	22.2302	22.4196	22.6409	22.8152	+	LFQ intensity LSD1_LFQ intensity NLS	11	11	11	14.7	14.7	14.7	122.37	0	29.952	276000000	43	2.96332	0	3.03292	1.20485	O43683	O43683	Mitotic checkpoint serine/threonine-protein kinase BUB1	BUB1	1406
18.7062	17.7134	17.4464	17.5048	20.3645	21.4726	20.5915	20.4375	+	LFQ intensity LSD1_LFQ intensity NLS	4	4	4	18.6	18.6	18.6	40.368	0	8.0288	50500000	6	3.49636	0	2.87382	1.20257	E9PKG6;V9HW75;A0A087WSV8;P80303;Q2L696;E9PLR0;E9PLE9;E9PJP3;H0YD18;E9PM22;H0YEG8	E9PKG6;V9HW75;A0A087WSV8;P80303;Q2L696;E9PLR0;E9PLE9	Nucleobindin-2;Nesfatin-1	NUCB2;HEL-S-109;Nucb2	22
20.1703	17.0068	17.2587	18.7096	22.3045	21.5165	21.6276	20.8423	+	LFQ intensity LSD1_LFQ intensity NLS	11	11	11	25.4	25.4	25.4	102.61	0	62.519	156000000	36	2.22479	0.00102564	3.28636	1.17773	I6L8A6;Q99708;J3QSH7;F6Q6H0;J3QLH2;J3QL00;J3QLW6	I6L8A6;Q99708	DNA endonuclease RBBP8	RBBP8	1157
18.8269	20.5915	19.7488	20.1581	22.8054	22.7895	22.2302	22.68	+	LFQ intensity LSD1_LFQ intensity NLS	40	40	1	24.2	24.2	0.9	296.67	0	323.31	795000000	203	3.36965	0.00097561	2.79499	1.16464	F5H212;A0A0D9SFF3;C9JLG1	F5H212		HIVEP1	849
17.642	17.9973	18.8607	18.3429	20.9672	20.8576	20.6886	20.7955	+	LFQ intensity LSD1_LFQ intensity NLS	5	5	5	10.8	10.8	10.8	100.43	0	11.016	55700000	10	4.19548	0.00096	2.61649	1.15462	Q8NEL9;A0A087X0H7	Q8NEL9;A0A087X0H7	Phospholipase DDHD1	DDHD1	3279
17.9161	17.7139	18.1801	19.6294	21.7675	20.6627	21.3045	20.7796	+	LFQ intensity LSD1_LFQ intensity NLS	5	5	4	4.7	4.7	3.8	197.4	0	9.6449	105000000	24	2.8213	0.00164384	2.7687	1.10614	A0A0A0MRJ3;Q8NEY1;H7BZD9	A0A0A0MRJ3;Q8NEY1	Neuron navigator 1	NAV1	202
19.7406	17.8183	17.5793	18.4504	21.0426	20.68	21.4324	21.5961	+	LFQ intensity LSD1_LFQ intensity NLS	14	14	14	10	10	10	254.41	0	27.048	166000000	25	2.74089	0.00163265	2.79061	1.10487	O75165;H0YA63;H0Y8Q2	O75165	DnaJ homolog subfamily C member 13	DNAJC13	1476
19.5223	19.3101	18.9686	19.8238	21.7594	21.632	21.8839	22.0426	+	LFQ intensity LSD1_LFQ intensity NLS	11	11	11	20	20	20	83.641	0	51.512	165000000	42	4.71438	0.00162162	2.42329	1.10141	Q9UHD2;F5H206;F5H1A3;F5GZI4	Q9UHD2	Serine/threonine-protein kinase TBK1	TBK1	4187
17.4322	18.9398	19.2843	18.8548	21.5777	21.4066	21.343	20.9024	+	LFQ intensity LSD1_LFQ intensity NLS	7	7	7	36.3	36.3	36.3	32.179	0	49.469	196000000	38	3.08254	0.00161074	2.67967	1.10105	P57052	P57052	Splicing regulator RBM11	RBM11	2242
21.4066	21.0359	21.0088	20.2419	23.4551	23.4298	23.1457	23.5404	+	LFQ intensity LSD1_LFQ intensity NLS	18	18	18	34.7	34.7	34.7	79.817	0	121.31	517000000	99	4.11781	0.00186842	2.46943	1.09307	Q96T51;H0YA47;J3KPP6;H0Y9Y8;H0YAC8	Q96T51	RUN and FYVE domain-containing protein 1	RUFY1	3634
24.4862	24.4984	24.1871	24.4234	26.9539	26.6458	26.6865	26.4938	+	LFQ intensity LSD1_LFQ intensity NLS	19	19	19	63.3	63.3	63.3	32.251	0	323.31	6070000000	361	5.87875	0.00179747	2.29625	1.0831	O43396;K7ER96;K7EML9;K7EPB7;K7EME7;K7EKG2	O43396;K7ER96	Thioredoxin-like protein 1	TXNL1	1394
18.2463	18.1444	20.6006	18.4327	21.3699	21.7471	21.6276	21.8346	+	LFQ intensity LSD1_LFQ intensity NLS	20	20	20	11.2	11.2	11.2	376.01	0	83.054	221000000	44	2.47847	0.00173171	2.78878	1.0754	Q14789;E7EU81;H0Y867;H7C5I7	Q14789;E7EU81;H0Y867	Golgin subfamily B member 1	GOLGB1	2637
20.4676	20.3962	20.5165	20.5545	22.9654	22.5938	22.8171	22.5708	+	LFQ intensity LSD1_LFQ intensity NLS	11	11	11	14.4	14.4	14.4	168.9	0	236.11	333000000	68	6.29283	0.00171084	2.25307	1.07273	Q7Z3T8;H0YAB1	Q7Z3T8	Zinc finger FYVE domain-containing protein 16	ZFYVE16	3063
20.9316	22.2448	21.8538	21.654	24.0935	24.1174	24.1946	24.0275	+	LFQ intensity LSD1_LFQ intensity NLS	36	36	36	26.5	26.5	26.5	210.63	0	282.08	980000000	234	3.91805	0.0017006	2.4372	1.07013	Q96Q89;A0A0A0MSJ5	Q96Q89	Kinesin-like protein KIF20B	KIF20B	3600
19.3603	18.7896	19.8817	18.593	21.002	21.4972	22.1734	22.2448	+	LFQ intensity LSD1_LFQ intensity NLS	12	12	12	11.1	11.1	11.1	160.16	0	51.053	148000000	25	3.09162	0.00204706	2.57319	1.06556	Q9NS87;C9JKA9;D6RCT7;H7BZT2	Q9NS87;C9JKA9	Kinesin-like protein KIF15	KIF15	4014
17.8198	18.3833	18.1676	18.6147	20.7715	20.68	20.4775	20.3857	+	LFQ intensity LSD1_LFQ intensity NLS	4	4	4	13.9	13.9	13.9	47.815	0	5.7916	62100000	10	4.73706	0.00203509	2.33235	1.06454	Q92844;E7EQA9;E7EWR8;E7EM55;E7ERM9;E7EV32;E7EMT6;E7ENY2;H7BZ28;E7EVA2;E7EW82;H7C3L4	Q92844;E7EQA9	TRAF family member-associated NF-kappa-B activator	TANK	3424
22.6276	22.5498	22.8538	22.5638	24.9933	24.918	24.7234	24.7796	+	LFQ intensity LSD1_LFQ intensity NLS	27	27	27	39.6	39.6	39.6	107.17	0	193.77	1660000000	257	6.40992	0.00197727	2.20483	1.05302	Q8TD19;G3V459;G3V2Z5;G3V5V0;REV__Q5SQT3;REV__Q9P0M6	Q8TD19	Serine/threonine-protein kinase Nek9	NEK9	3324
17.9604	17.6319	18.4735	21.0691	21.2593	22.019	21.6364	21.9098	+	LFQ intensity LSD1_LFQ intensity NLS	6	6	6	1.6	1.6	1.6	531.78	0	7.0724	286000000	13	1.97345	0.00216216	2.92241	1.04396	Q15149;E9PMV1;H0YDN1	Q15149	Plectin	PLEC	2672
17.7457	19.2476	21.5165	19.0717	20.6364	22.1238	23.5045	24.2891	+	LFQ intensity LSD1_LFQ intensity NLS	8	8	7	48.1	48.1	44.9	34.352	0	24.886	354000000	36	1.5585	0.00215054	3.24307	1.03892	Q12904;D6R937	Q12904	Aminoacyl tRNA synthase complex-interacting multifunctional protein 1;Endothelial monocyte-activating polypeptide 2	AIMP1	2496
17.624	18.6326	19.6665	18.4601	21.0821	21.4118	21.3101	20.714	+	LFQ intensity LSD1_LFQ intensity NLS	21	21	21	11.5	11.5	11.5	425.23	0	47.143	167000000	47	2.88695	0.00210526	2.53369	1.03542	A0A087WV20;A0A087WTU9;A0A087WZY3;Q8TCU4;H7C1D9	A0A087WV20;A0A087WTU9;A0A087WZY3;Q8TCU4	Alstrom syndrome protein 1	ALMS1	31
22.3936	21.895	22.0459	22.2155	24.2535	24.3712	24.2244	24.4234	+	LFQ intensity LSD1_LFQ intensity NLS	20	20	20	21.6	21.6	21.6	150.07	0	220.43	1470000000	266	5.80123	0.00208333	2.18059	1.02979	Q6Y7W6;I1E4Y6;E7ESB6;C9JHW1;C9JH18;F8WCD5;C9JPV7;C9JXQ0;C9J0V6;C9JHT0;C9JRZ2;C9JW88;C9JH78;C9IYH5;C9J7G1;B8ZZD2	Q6Y7W6;I1E4Y6;E7ESB6;C9JHW1	PERQ amino acid-rich with GYF domain-containing protein 2	GIGYF2	3015
21.1886	20.4066	20.7471	20.2066	23.1079	22.6431	22.9933	23.0071	+	LFQ intensity LSD1_LFQ intensity NLS	23	23	23	13.5	13.5	13.5	294.36	0	47.454	463000000	70	4.15574	0.00207254	2.30061	1.02808	Q9UPU5	Q9UPU5	Ubiquitin carboxyl-terminal hydrolase 24	USP24	4273
17.3008	18.7029	19.0019	19.1604	20.5915	20.8651	21.0224	22.1426	+	LFQ intensity LSD1_LFQ intensity NLS	4	4	4	9.8	9.8	9.8	62.196	0	7.8058	118000000	9	2.52391	0.00206186	2.61392	1.02737	A0A0A0MSS3;Q8ND83;C9JP03;C9JD09;C9JUW9;X6RDJ2;Q5T6P1;X6RGK9;A0A0C4DFN6;Q5T6P2;Q5T6P5;B7Z326	A0A0A0MSS3;Q8ND83;C9JP03;C9JD09;C9JUW9;X6RDJ2;Q5T6P1;X6RGK9;A0A0C4DFN6;Q5T6P2	SLAIN motif-containing protein 1	SLAIN1	233
17.0239	18.6628	17.5597	19.1284	20.6453	20.1332	21.1206	20.8034	+	LFQ intensity LSD1_LFQ intensity NLS	4	4	4	20.9	20.9	20.9	39.945	0	8.9864	60100000	9	2.56632	0.00251777	2.58192	1.02171	Q02833;H0YEI0	Q02833;H0YEI0	Ras association domain-containing protein 7	RASSF7	2425
18.3105	18.2939	20.6096	18.8213	21.9742	21.4015	21.2764	21.8727	+	LFQ intensity LSD1_LFQ intensity NLS	9	9	8	10.1	10.1	9.4	142.82	0	17.65	175000000	24	2.41902	0.00250505	2.62234	1.01885	P11274;A9UF01;H0Y554;I3L1U8	P11274	Breakpoint cluster region protein	BCR	1733
22.4923	22.1301	22.0983	22.5869	24.8093	24.632	24.9316	24.0275	+	LFQ intensity LSD1_LFQ intensity NLS	24	24	24	49.7	49.7	49.7	61.332	0	293.81	2010000000	324	4.14426	0.00246766	2.27321	1.01663	Q9HCC0;D6RD67;D6RDF7;D6R9R1	Q9HCC0;D6RD67;D6RDF7	Methylcrotonoyl-CoA carboxylase beta chain, mitochondrial	MCCC2	3948
18.2778	18.4822	19.0343	16.9105	19.2464	21.5165	21.2933	21.7182	+	LFQ intensity LSD1_LFQ intensity NLS	7	7	7	1.3	1.3	1.3	847.96	0	13.886	156000000	11	2.04601	0.00243137	2.76742	1.01417	F8W9J4;Q03001;E7ERU0;E9PHM6;F6QMI7;E9PEB9;Q6P0N6;E7ETB9	F8W9J4;Q03001;E7ERU0;E9PHM6;F6QMI7;E9PEB9	Dystonin	DST	928
18.528	18.0899	19.4476	18.2072	22.0258	20.9316	20.5165	20.6971	+	LFQ intensity LSD1_LFQ intensity NLS	27	27	27	36.4	36.4	36.4	122.84	0	222.78	380000000	63	2.78364	0.00257005	2.47456	1.00704	P82094;A0A0A0MTG4;F8WF45	P82094;A0A0A0MTG4;F8WF45	TATA element modulatory factor	TMF1	2378
18.2118	18.3289	19.1531	19.3123	20.6627	21.1143	21.2244	21.2361	+	LFQ intensity LSD1_LFQ intensity NLS	3	3	3	10.3	10.3	10.3	67.299	0	7.3278	78500000	22	3.50755	0.00293458	2.30783	0.998408	Q6UUV9;M0QXN6;M0QX46	Q6UUV9;M0QXN6;M0QX46	CREB-regulated transcription coactivator 1	CRTC1	3006
17.2119	19.3582	20.417	19.2955	21.7471	21.6627	21.8152	21.7056	+	LFQ intensity LSD1_LFQ intensity NLS	13	13	13	9.3	9.3	9.3	223.69	0	28.321	180000000	25	2.1294	0.00316279	2.66198	0.996381	J3KN16;Q5VYK3;R4GMY1;R4GMY3	J3KN16;Q5VYK3	Proteasome-associated protein ECM29 homolog	KIAA0368;ECM29	1162
22.8385	22.6006	23.5983	21.3538	24.5522	24.9716	25.2891	25.5522	+	LFQ intensity LSD1_LFQ intensity NLS	6	6	6	52.9	52.9	52.9	8.2178	0	34.253	2210000000	116	2.54785	0.00307692	2.49346	0.992063	P63173;J3KT73;J3QL01;J3KSP2	P63173;J3KT73;J3QL01	60S ribosomal protein L38	RPL38	2348
18.7535	17.6249	18.8736	19.8406	21.5356	21.1332	20.8269	21.4066	+	LFQ intensity LSD1_LFQ intensity NLS	6	6	6	11.5	11.5	11.5	98.655	0	59.612	123000000	36	2.65726	0.00300885	2.45245	0.988886	P42566;B1AUU8	P42566;B1AUU8	Epidermal growth factor receptor substrate 15	EPS15	2043
21.265	20.9388	17.8744	21.4273	24.019	22.7655	22.9864	23.0854	+	LFQ intensity LSD1_LFQ intensity NLS	1	1	1	28	28	28	5.8668	0	14.476	459000000	28	1.73503	0.00296943	2.83773	0.983787	F8VSA6;E9PS38;S4R3E9;E9PL57;Q15843	F8VSA6;E9PS38;S4R3E9;E9PL57;Q15843	NEDD8	NEDD8;NEDD8-MDP1	777
17.8605	17.4513	17.8558	19.0924	20.3645	20.4972	20.4676	20.1946	+	LFQ intensity LSD1_LFQ intensity NLS	6	6	6	13.9	13.9	13.9	82.015	0	20.438	115000000	33	3.16219	0.00321739	2.31598	0.98046	Q9Y2K1;G3V3N0;G3V2I8;G3V447	Q9Y2K1	Zinc finger and BTB domain-containing protein 1	ZBTB1	4303
23.2821	22.7816	23.2821	22.8932	25.1371	25.2096	24.9495	25.417	+	LFQ intensity LSD1_LFQ intensity NLS	35	35	2	40.7	40.7	2.8	113.65	0	306.94	2030000000	278	4.90498	0.00320346	2.11857	0.979788	O75150;H3BS50	O75150	E3 ubiquitin-protein ligase BRE1B	RNF40	1472
20.1825	20.343	18.272	18.9612	22.2448	21.9495	21.8191	21.5069	+	LFQ intensity LSD1_LFQ intensity NLS	10	10	10	22.7	22.7	22.7	79.135	0	20.152	175000000	49	2.47612	0.00312236	2.4404	0.968526	Q9H6R7;C9JYC1	Q9H6R7	WD repeat and coiled-coil-containing protein C2orf44	C2orf44	3893
22.1581	21.3266	22.1946	22.2096	23.9847	23.8288	24.275	24.5463	+	LFQ intensity LSD1_LFQ intensity NLS	31	31	31	35	35	35	139.09	0	176.48	883000000	157	3.74156	0.00303279	2.18647	0.96418	E7EX90;Q14203;Q6AWB1;E7EWF7;C9J1B7;C9JZA4;C9JTE5;C9JJN7;C9JJD0;C9JKG6;E9PCY0	E7EX90;Q14203;Q6AWB1	Dynactin subunit 1	DCTN1;DKFZp686E0752	721
20.1825	21.0821	20.2066	20.5823	22.7995	22.7715	22.5141	22.4825	+	LFQ intensity LSD1_LFQ intensity NLS	18	18	18	44.7	44.7	44.7	69.666	0	146.95	487000000	100	4.0846	0.0029249	2.12851	0.956021	Q14145;K7EJ49;K7EJD8;K7ESE0;K7EQX2;K7EPZ3	Q14145	Kelch-like ECH-associated protein 1	KEAP1	2591
28.2308	28.1842	27.7518	27.8858	30.3088	30.2535	29.8385	29.8799	+	LFQ intensity LSD1_LFQ intensity NLS	132	132	4	64.1	64.1	1.6	280.74	0	323.31	76100000000	2687	4.73223	0.00289062	2.05704	0.948501	P21333;Q5HY54;F8WE98;H0Y5F3;H7C2E7	P21333;Q5HY54	Filamin-A	FLNA	1839
18.6276	17.4134	17.9327	20.2764	20.7634	20.7056	21.2933	21.5498	+	LFQ intensity LSD1_LFQ intensity NLS	6	6	6	14.6	14.6	14.6	78.767	0	35.001	139000000	19	2.06461	0.00287938	2.51551	0.947075	Q8N6R0	Q8N6R0	Methyltransferase-like protein 13	METTL13	3233
25.3811	25.5344	24.8997	25.1871	27.3578	27.341	27.6527	26.965	+	LFQ intensity LSD1_LFQ intensity NLS	33	33	33	58.8	58.8	58.8	74.484	0	323.31	12500000000	736	4.37747	0.00286822	2.07854	0.946322	Q86T24	Q86T24	Transcriptional regulator Kaiso	ZBTB33	3090
20.4775	18.3366	16.8402	18.4019	20.6096	20.9316	21.2989	21.6757	+	LFQ intensity LSD1_LFQ intensity NLS	18	18	18	5.8	5.8	5.8	510.08	0	79.414	186000000	30	1.80872	0.00284615	2.61491	0.93995	O75592;H7C3U4;A0A0C4DGY7	O75592	E3 ubiquitin-protein ligase MYCBP2	MYCBP2	1508
19.7249	18.1301	19.8757	19.0684	21.3592	21.502	21.0156	22.0756	+	LFQ intensity LSD1_LFQ intensity NLS	7	7	7	33	33	33	36.966	0	39.264	204000000	36	2.62525	0.00296629	2.28832	0.932282	Q06609;E9PNT5;E9PJ30;Q9NZG9;E9PI54	Q06609;E9PNT5	DNA repair protein RAD51 homolog 1	RAD51	2453
17.4231	18.9358	18.2762	18.6131	19.8315	20.5356	20.7471	21.2066	+	LFQ intensity LSD1_LFQ intensity NLS	11	11	11	13.6	13.6	13.6	122.15	0	22.641	127000000	25	2.70985	0.00295522	2.26815	0.932096	Q9UPN4;I3L2J8;I3L2X7;I3L316;I3L4M5	Q9UPN4;I3L2J8;I3L2X7	Centrosomal protein of 131 kDa	CEP131	4266
19.1382	18.8936	18.3592	19.1778	21.417	21.4066	21.3376	20.1825	+	LFQ intensity LSD1_LFQ intensity NLS	8	7	7	11.8	10.6	10.6	102.28	0	18.08	79000000	15	3.07871	0.00292251	2.19374	0.931256	Q8NI77	Q8NI77	Kinesin-like protein KIF18A	KIF18A	3302
18.8111	19.647	18.6994	17.9938	20.7955	20.7389	21.0691	21.2707	+	LFQ intensity LSD1_LFQ intensity NLS	8	8	8	5	5	5	311.64	0	14.229	124000000	24	3.03312	0.00282857	2.1807	0.923757	P25054;E9PFT7;B7Z2B6;H3BNH8;R4GMU6	P25054;E9PFT7;B7Z2B6	Adenomatous polyposis coli protein	APC	1876
24.0105	23.632	23.5404	23.8191	25.9716	25.7619	25.5841	25.5609	+	LFQ intensity LSD1_LFQ intensity NLS	18	18	18	60	60	60	40.572	0	194.5	2120000000	220	5.07147	0.00278873	1.96912	0.919623	Q9UNZ2;F2Z2K0;R4GNE6;G3V4V8;R4GMY2	Q9UNZ2;F2Z2K0	NSFL1 cofactor p47	NSFL1C	4265
17.9519	20.1825	20.343	17.9689	21.5915	21.2989	21.823	21.5498	+	LFQ intensity LSD1_LFQ intensity NLS	8	8	8	8.9	8.9	8.9	146.56	0	21.495	172000000	18	1.96569	0.00276923	2.45423	0.917794	O60343;Q5JU47	O60343	TBC1 domain family member 4	TBC1D4	1435
17.5451	17.4501	18.438	18.7808	21.6409	21.1886	21.5165	18.3318	+	LFQ intensity LSD1_LFQ intensity NLS	3	3	3	3.4	3.4	3.4	137.33	0	17.134	134000000	4	1.66048	0.00275958	2.61594	0.917481	Q9Y4H2	Q9Y4H2	Insulin receptor substrate 2	IRS2	4348
18.8378	18.2072	20.1946	18.5218	21.4375	21.9061	21.1457	20.5165	+	LFQ intensity LSD1_LFQ intensity NLS	8	8	8	16.7	16.7	16.7	96.753	0	24.159	117000000	21	2.34019	0.00273103	2.3111	0.915192	Q9ULE6	Q9ULE6	Paladin	PALD1	4238
25.0443	25.2856	25.1095	25.3101	26.9428	27.0505	27.1795	27.189	+	LFQ intensity LSD1_LFQ intensity NLS	29	29	29	67.1	67.1	67.1	50.227	0	291.81	7020000000	478	6.2041	0.00270307	1.90308	0.911572	Q9Y265;E7ETR0;H7C4G5;H7C4I3;J3QLR1	Q9Y265;E7ETR0	RuvB-like 1	RUVBL1	4293
20.265	18.0084	18.6357	18.1555	20.8113	21.3538	21.002	21.1206	+	LFQ intensity LSD1_LFQ intensity NLS	9	9	9	20	20	20	71.863	0	27.569	146000000	21	2.31863	0.00269388	2.30575	0.91152	Q15025;A0A0A0MRZ4;E7EMV7;H0YC17;E7EW15;E7EWG2;E7EW68	Q15025;A0A0A0MRZ4;E7EMV7	TNFAIP3-interacting protein 1	TNIP1	2657
20.3211	22.0156	20.9812	21.2593	22.4676	23.0789	24.1174	24.1871	+	LFQ intensity LSD1_LFQ intensity NLS	59	59	59	26.1	26.1	26.1	367.76	0	323.31	781000000	152	2.27021	0.00268475	2.31844	0.910892	P49454;A0A087WTY4	P49454	Centromere protein F	CENPF	2112
24.3975	23.8858	24.1174	24.1642	26.5492	26.0854	25.8361	26.0443	+	LFQ intensity LSD1_LFQ intensity NLS	18	18	18	61.2	61.2	61.2	33.83	0	266.33	5960000000	357	4.43724	0.00265772	1.98749	0.910279	P46108;I3L297	P46108	Adapter molecule crk	CRK	2069
19.1079	19.4313	19.9742	20.1581	21.3101	21.4576	22.0054	22.44	+	LFQ intensity LSD1_LFQ intensity NLS	16	16	16	19.1	19.1	19.1	140.53	0	32.77	181000000	38	3.02119	0.00284	2.13539	0.906733	Q99707;B1ANE3	Q99707;B1ANE3	Methionine synthase	MTR	3660
19.8576	20.5261	21.1332	20.8191	22.4825	22.8288	22.5915	22.7013	+	LFQ intensity LSD1_LFQ intensity NLS	28	28	28	23.4	23.4	23.4	227.73	0	102.78	451000000	90	3.48245	0.00282119	2.06703	0.905813	E7ETA6;Q15154;A6NNN6;H0YBA1;E7EV93;E5RGQ4;E9PGW9	E7ETA6;Q15154;A6NNN6	Pericentriolar material 1 protein	PCM1	696
20.7634	20.5915	21.6364	20.6364	23.2288	22.7655	22.8708	22.9672	+	LFQ intensity LSD1_LFQ intensity NLS	17	17	17	24.7	24.7	24.7	121.98	0	66.088	640000000	104	3.61094	0.00281188	2.0511	0.905512	Q9UQL6;K7EJL6;K7EJL4;K7EJZ7;K7ES01;C9J0X4;C9J481;B7Z3P7;B5MCF1;Q9UKV0;P56524	Q9UQL6	Histone deacetylase 5	HDAC5	4281
19.1649	18.9806	17.3458	18.9127	20.4874	20.4476	21.0625	21.3376	+	LFQ intensity LSD1_LFQ intensity NLS	16	16	16	7.4	7.4	7.4	378.03	0	42.719	104000000	17	2.47733	0.00277524	2.23277	0.902049	O95613	O95613	Pericentrin	PCNT	1586
17.4122	21.6627	18.44	18.8818	22.3101	21.9742	21.7836	20.9531	+	LFQ intensity LSD1_LFQ intensity NLS	6	6	6	21.8	21.8	21.8	45.581	0	10.199	263000000	17	1.49884	0.00309091	2.65603	0.899422	Q96BU1;E9PSA0;E9PIY5;E9PMK1;E9PL86;E9PIZ7	Q96BU1;E9PSA0	S100P-binding protein	S100PBP	3479
20.7056	20.3645	19.6347	17.2797	21.9316	22.1143	22.1174	21.7876	+	LFQ intensity LSD1_LFQ intensity NLS	13	13	12	13.2	13.2	12.4	185.19	0	51.253	242000000	70	1.73656	0.00307097	2.4916	0.897573	E9PCH4;Q8TEU7;A0A0A6YYB7;A0A0A0MR23;D6RE77;B7Z7Y1;A0A0A6YYJ1	E9PCH4;Q8TEU7;A0A0A6YYB7;A0A0A0MR23;D6RE77;B7Z7Y1	Rap guanine nucleotide exchange factor 6	RAPGEF6	731
18.2563	17.5489	18.3813	18.1821	19.9459	20.1946	19.8802	20.1825	+	LFQ intensity LSD1_LFQ intensity NLS	11	11	11	6	6	6	330.63	0	19.393	63500000	24	4.15516	0.0033817	1.95868	0.889311	Q68DQ2	Q68DQ2	Very large A-kinase anchor protein	CRYBG3	2925
24.5404	24.2535	24.4488	24.5696	26.3393	26.3728	26.1391	26.3992	+	LFQ intensity LSD1_LFQ intensity NLS	83	83	83	46.2	46.2	46.2	225.49	0	323.31	4530000000	628	6.00286	0.00337107	1.8595	0.888586	Q14008;H0YDX5;E9PQH5;H0YCF6;H0YEK7	Q14008	Cytoskeleton-associated protein 5	CKAP5	2581
21.7307	21.2185	21.0559	21.7995	23.1426	23.4425	23.3645	23.7594	+	LFQ intensity LSD1_LFQ intensity NLS	34	34	0	16.9	16.9	0	319.1	0	178.22	673000000	145	3.92233	0.0033605	1.97614	0.888312	P50851;H0YA17	P50851	Lipopolysaccharide-responsive and beige-like anchor protein	LRBA	2146
22.3988	21.8461	21.8152	21.7634	24.0359	23.7695	23.8385	23.8385	+	LFQ intensity LSD1_LFQ intensity NLS	31	31	31	34	34	34	120.75	0	266.53	1160000000	278	4.69564	0.00332919	1.91468	0.886694	Q9C0B7	Q9C0B7	Transport and Golgi organization protein 6 homolog	TANGO6	3804
18.0307	19.9742	17.1673	18.2537	20.6364	20.6714	20.6886	20.5638	+	LFQ intensity LSD1_LFQ intensity NLS	14	13	13	10.1	9.7	9.7	236.6	0	25.826	136000000	17	2.08768	0.00330864	2.28357	0.882176	Q86YA3;G3XAL8;I3L0G6	Q86YA3;G3XAL8	Protein ZGRF1	ZGRF1	3137
19.2787	19.8742	20.1457	20.4972	21.2477	21.9061	22.6342	22.4247	+	LFQ intensity LSD1_LFQ intensity NLS	17	17	17	6.3	6.3	6.3	530.25	0	99.818	263000000	62	2.70972	0.00325836	2.10426	0.87601	Q9NR09	Q9NR09	Baculoviral IAP repeat-containing protein 6	BIRC6	3993
20.1079	20.3211	19.6204	18.6294	21.68	22.2036	21.6051	21.6096	+	LFQ intensity LSD1_LFQ intensity NLS	11	11	11	38.8	38.8	38.8	47.366	0	39.92	165000000	35	2.70483	0.00324848	2.10489	0.875903	P43686	P43686	26S protease regulatory subunit 6B	PSMC4	2058
17.8655	18.3906	17.2121	18.0974	20.2535	19.3167	19.8469	20.3538	+	LFQ intensity LSD1_LFQ intensity NLS	10	10	1	8.6	8.6	0.5	211.99	0	38.42	73300000	17	3.00138	0.00323867	2.05132	0.875122	H0Y966;A0A0A0MR42;K7ENP4;K7EPA2;C9JT09	H0Y966;A0A0A0MR42;K7ENP4		CEP192	1011
21.8689	22.3936	21.743	21.6497	23.8093	23.8858	23.7796	23.7182	+	LFQ intensity LSD1_LFQ intensity NLS	33	33	33	23.6	23.6	23.6	265.61	0	210.55	1120000000	199	4.49732	0.00355821	1.88439	0.868491	Q9HCK1;N0DVX5	Q9HCK1;N0DVX5	DBF4-type zinc finger-containing protein 2	ZDBF2	3954
19.4496	19.4624	18.8583	18.0358	20.6453	21.1886	21.1886	20.9672	+	LFQ intensity LSD1_LFQ intensity NLS	8	8	8	15	15	15	108.2	0	19.742	127000000	33	2.89349	0.00352663	2.04589	0.866942	Q9NRA8;B1AKL4;B0QYZ7;B1AKL5;B1AKL6	Q9NRA8;B1AKL4;B0QYZ7	Eukaryotic translation initiation factor 4E transporter	EIF4ENIF1	4000
22.8614	22.9153	22.4425	22.8557	24.2961	24.9584	25.2961	24.3511	+	LFQ intensity LSD1_LFQ intensity NLS	39	38	38	35.3	35.3	35.3	152.6	0	323.31	2580000000	422	3.49159	0.0034956	1.95674	0.863561	A6NHB5;Q14202;A6NHN7;A6NL54;A6NC58	A6NHB5;Q14202;A6NHN7	Zinc finger MYM-type protein 3	ZMYM3	361	+
21.6928	21.4825	21.2821	18.4636	23.0258	23.0724	22.9985	23.3645	+	LFQ intensity LSD1_LFQ intensity NLS	22	22	22	30.5	30.5	30.5	97.34	0	81.246	697000000	90	1.6855	0.00363743	2.38504	0.862628	Q92667;I3L0W0;I3L2A2;I3L2N7;I3L0K6;I3L364;I3L3K1;I3NI36	Q92667	A-kinase anchor protein 1, mitochondrial	AKAP1	3414
20.7471	20.7715	20.3321	20.6364	22.1457	22.3725	22.7553	22.6409	+	LFQ intensity LSD1_LFQ intensity NLS	13	13	13	27.5	27.5	27.5	76.059	0	142.79	387000000	80	4.45495	0.00374566	1.85679	0.855622	D3YTB5;P51617;H7C224;H7C2I6;H7C3C1;F8WAB6;H7C3G8;H7C1F0;F6U4U2;P51955	D3YTB5;P51617;H7C224	Interleukin-1 receptor-associated kinase 1	IRAK1	602
18.2192	18.4765	17.9368	18.0001	20.2419	20.5356	20.0292	19.4972	+	LFQ intensity LSD1_LFQ intensity NLS	6	6	6	10.1	10.1	10.1	100.96	0	43.008	47300000	14	3.58265	0.00370286	1.91784	0.852052	A6NF31;O75665;A0A0A0MS89	A6NF31;O75665;A0A0A0MS89	Oral-facial-digital syndrome 1 protein	OFD1	356
17.8211	17.6507	18.3192	19.8547	19.8591	20.6971	20.9388	20.8269	+	LFQ intensity LSD1_LFQ intensity NLS	5	5	5	13.1	13.1	13.1	68.833	0	22.756	82000000	20	2.08989	0.00384046	2.16903	0.847803	Q9UJX2	Q9UJX2	Cell division cycle protein 23 homolog	CDC23	4209	+
18.7244	17.8904	18.5341	17.5471	19.7056	20.0691	20.1332	20.7553	+	LFQ intensity LSD1_LFQ intensity NLS	8	8	8	12.1	12.1	12.1	99.289	0	26.616	74700000	18	2.89148	0.0038187	1.99181	0.847328	Q15276;I3L456	Q15276	Rab GTPase-binding effector protein 1	RABEP1	2678
20.8727	20.3538	21.0088	21.1395	22.6907	23.2477	22.3129	22.743	+	LFQ intensity LSD1_LFQ intensity NLS	20	20	15	36.8	36.8	26	71.407	0	86.302	397000000	75	3.50062	0.00393258	1.9049	0.84367	G3V5R9;G3V3H3;G5E9S8;G3V2E7;F8W6L3;E7EVH7;Q07866;H0YG16;H0YJU9;H0YJL0;H0YJT3;G3V2P7;H7C4M1;E9PQ02;A8MX29;H0YJK1;H0YGB8;K7EL76;Q6P597	G3V5R9;G3V3H3;G5E9S8;G3V2E7;F8W6L3;E7EVH7;Q07866	Kinesin light chain 1	KLC1	970
18.7196	18.6946	19.0708	17.8691	20.6186	20.1825	20.5356	20.6971	+	LFQ intensity LSD1_LFQ intensity NLS	3	3	3	2.2	2.2	2.2	216.04	0	8.2557	77600000	5	3.33397	0.00410056	1.91994	0.842492	Q3V6T2;H0Y470;H7C2C6;H0Y7K3;H0Y7U8;A0A087WXD9	Q3V6T2;H0Y470;H7C2C6	Girdin	CCDC88A	2779
21.3805	21.0426	20.9316	20.2535	22.5285	22.9153	22.8073	22.9316	+	LFQ intensity LSD1_LFQ intensity NLS	14	14	14	38.3	38.3	38.3	63.309	0	155.78	447000000	106	3.52214	0.00407778	1.89363	0.840107	Q9NPI6;A0A087WT55;A0A087WXD0;A0A087WVE6	Q9NPI6	mRNA-decapping enzyme 1A	DCP1A	3977
22.4451	22.3805	23.1886	23.3239	24.7338	24.5522	24.6595	24.9672	+	LFQ intensity LSD1_LFQ intensity NLS	31	31	31	45.3	45.3	45.3	105.84	0	216.86	1390000000	238	3.46065	0.00405525	1.89365	0.837641	Q99460;A0A087WW66;H7C378;C9J9M4;H7BZR6;F8WCE3	Q99460;A0A087WW66	26S proteasome non-ATPase regulatory subunit 1	PSMD1	3641
17.8428	18.4409	19.7857	19.4323	20.8727	21.0886	20.6096	21.1457	+	LFQ intensity LSD1_LFQ intensity NLS	6	6	6	14.5	14.5	14.5	88.761	0	9.5928	111000000	9	2.35735	0.00419672	2.05375	0.833871	H3BND4;Q6P996;Q86XE2;J3KNK7;Q6P474	H3BND4;Q6P996;Q86XE2	Pyridoxal-dependent decarboxylase domain-containing protein 1	PDXDC1	1075
19.4046	19.3123	18.1307	18.6168	20.265	21.0951	21.1642	20.8113	+	LFQ intensity LSD1_LFQ intensity NLS	18	18	18	25.6	25.6	25.6	109.7	0	62.163	276000000	79	2.77887	0.00418529	1.96779	0.832256	Q96QT6;C9J9G2;K7EPF7;K7ERZ4;K7EJN7;K7ENU0;K7EJ43	Q96QT6;C9J9G2	PHD finger protein 12	PHF12	3603
19.4273	18.0597	18.5186	19.5108	21.0625	21.3699	20.4676	20.6276	+	LFQ intensity LSD1_LFQ intensity NLS	10	8	8	19.8	16.9	16.9	85.075	0	23.428	117000000	19	2.56523	0.0041626	2.00282	0.831372	E7ER32;A0A087X287;W0Z7M9;Q969V6;B0QY83;A0A087WU73	E7ER32;A0A087X287;W0Z7M9;Q969V6;B0QY83;A0A087WU73	MKL/myocardin-like protein 1	MKL1;mkl1	163
23.632	23.8191	22.5731	22.5961	25.3307	25.4425	25.3443	24.4488	+	LFQ intensity LSD1_LFQ intensity NLS	42	42	35	65.9	65.9	56.2	88.336	0	323.31	7610000000	481	2.56986	0.00436658	1.98655	0.826057	Q96JM7;E9PLL7	Q96JM7	Lethal(3)malignant brain tumor-like protein 3	L3MBTL3	3564	+
24.945	24.4425	24.7796	24.8385	26.6865	26.673	26.3612	26.3545	+	LFQ intensity LSD1_LFQ intensity NLS	35	35	32	55.7	55.7	52.8	97.621	0	323.31	5450000000	507	4.76857	0.00442781	1.76739	0.82477	Q9UBF2;H3BS45;F5H1S1;Q92521	Q9UBF2	Coatomer subunit gamma-2	COPG2	4155
19.0722	18.772	18.2606	18.8228	20.2989	20.7223	20.4375	20.5915	+	LFQ intensity LSD1_LFQ intensity NLS	3	3	3	6.2	6.2	6.2	102.2	0	6.2614	54200000	5	4.03221	0.00522917	1.78063	0.811778	Q6ULP2;B8ZZI9	Q6ULP2;B8ZZI9	Aftiphilin	AFTPH	3003
20.9098	21.3376	19.9742	20.2877	21.9098	22.6253	23.002	22.7056	+	LFQ intensity LSD1_LFQ intensity NLS	28	28	28	38.4	38.4	38.4	137.53	0	112.2	826000000	164	2.62528	0.00521558	1.93334	0.810958	Q92610;H0YM74	Q92610;H0YM74	Zinc finger protein 592	ZNF592	3404
21.2821	21.1332	19.9214	20.7876	22.5846	22.7286	22.44	22.8858	+	LFQ intensity LSD1_LFQ intensity NLS	26	24	24	15	14	14	293.51	0	69.185	518000000	142	2.97089	0.00518863	1.87868	0.810004	Q9UMN6	Q9UMN6	Histone-lysine N-methyltransferase 2B	KMT2B	4252
19.9601	20.1581	19.5242	17.9516	22.0821	20.8499	22.2535	20.9024	+	LFQ intensity LSD1_LFQ intensity NLS	5	5	5	40.2	40.2	40.2	22.882	0	14.181	125000000	11	1.83774	0.00517526	2.1235	0.808981	Q8N5W9	Q8N5W9	Filamin-interacting protein FAM101B	FAM101B	3229
17.7192	18.9028	18.6538	18.406	20.2185	20.1457	20.0821	20.5823	+	LFQ intensity LSD1_LFQ intensity NLS	6	6	6	6.1	6.1	6.1	165.95	0	25.674	73800000	15	3.23522	0.00528205	1.83667	0.806159	O43379;H7C3R4	O43379	WD repeat-containing protein 62	WDR62	1391
17.9902	18.4553	17.4001	18.6769	20.5165	19.3879	20.2066	20.0426	+	LFQ intensity LSD1_LFQ intensity NLS	5	5	5	15.1	15.1	15.1	61.24	0	11.125	54600000	15	2.68084	0.00524173	1.90774	0.805164	Q8IX15;U3KPW8	Q8IX15;U3KPW8	Homeobox and leucine zipper protein Homez	HOMEZ	3169
23.0559	22.5309	22.5638	22.2764	24.2891	24.5463	24.2678	24.3101	+	LFQ intensity LSD1_LFQ intensity NLS	13	12	12	28.4	26.8	26.8	78.947	0	62.857	1680000000	156	4.22731	0.00521519	1.74658	0.802894	O14641;I3L2W9;I3L2N2;I3L0M7;I3L0Z8	O14641;I3L2W9;I3L2N2;I3L0M7	Segment polarity protein dishevelled homolog DVL-2	DVL2	1315
20.4874	20.3211	19.4108	19.7504	22.019	21.8113	21.5404	21.8307	+	LFQ intensity LSD1_LFQ intensity NLS	13	13	13	31.8	31.8	31.8	72.123	0	42.861	220000000	50	3.28035	0.00524069	1.80792	0.796901	Q9H7D7;H0Y9R3;C9JCS7;H0Y917	Q9H7D7;H0Y9R3	WD repeat-containing protein 26	WDR26	3902
18.5955	20.7307	20.8113	17.903	22.1519	21.9171	21.4324	21.3376	+	LFQ intensity LSD1_LFQ intensity NLS	11	11	11	38.3	38.3	38.3	40.836	0	31.513	295000000	51	1.54542	0.00547525	2.19964	0.795004	A0A087WXC5;E7ESZ7;O95299;Q8N1B9;C9J6X0;H7C2W5;H7C1Y7;H7C2X4	A0A087WXC5;E7ESZ7;O95299	NADH dehydrogenase [ubiquinone] 1 alpha subcomplex subunit 10, mitochondrial	NDUFA10	90
22.2244	22.0054	21.8876	22.0054	23.7895	23.7286	23.6757	23.5404	+	LFQ intensity LSD1_LFQ intensity NLS	17	17	17	29.5	29.5	29.5	81.116	0	114.43	910000000	122	5.83043	0.00557635	1.65287	0.791579	Q5W0B1	Q5W0B1	RING finger protein 219	RNF219	2913
18.9714	20.343	19.6869	20.4676	21.8987	21.8269	21.5823	21.6096	+	LFQ intensity LSD1_LFQ intensity NLS	23	23	16	9.1	9.1	6.6	394.46	0	125.42	287000000	75	2.7268	0.00553545	1.86217	0.791375	P46939;H0Y337	P46939	Utrophin	UTRN	2080
18.1302	20.1206	18.843	19.1815	21.1015	21.002	20.8034	21.0156	+	LFQ intensity LSD1_LFQ intensity NLS	12	12	12	14.7	14.7	14.7	142.83	0	37.293	137000000	34	2.41974	0.00550852	1.9118	0.79059	Q96PY6;H0Y8M6	Q96PY6	Serine/threonine-protein kinase Nek1	NEK1	3598
20.0292	19.9229	20.0559	19.4815	21.6006	21.7915	21.4476	21.4425	+	LFQ intensity LSD1_LFQ intensity NLS	7	7	7	10.8	10.8	10.8	103.77	0	120.92	190000000	41	4.43619	0.0054686	1.6982	0.787387	J3KNZ9;Q9HAH7;H3BRE6	J3KNZ9;Q9HAH7	Probable fibrosin-1	FBRS	1173
18.484	18.298	18.5968	18.963	20.0821	20.0821	20.6886	20.417	+	LFQ intensity LSD1_LFQ intensity NLS	7	7	7	6.5	6.5	6.5	196.71	0	12.416	78800000	23	3.84872	0.00545542	1.73202	0.786249	Q9BY89	Q9BY89	Uncharacterized protein KIAA1671	KIAA1671	3777
18.7133	18.1466	18.8062	18.8825	20.8269	20.9388	21.0691	19.3551	+	LFQ intensity LSD1_LFQ intensity NLS	5	5	5	9.1	9.1	9.1	122.57	0	14.415	135000000	12	2.34095	0.00556563	1.91026	0.784824	Q8WVS4;H7C022	Q8WVS4;H7C022	WD repeat-containing protein 60	WDR60	3367
19.3709	18.1447	18.803	18.5749	20.6886	20.2302	20.714	20.4066	+	LFQ intensity LSD1_LFQ intensity NLS	9	9	9	12.1	12.1	12.1	139.99	0	17.981	115000000	23	3.15156	0.00555238	1.78646	0.783319	P78312;E7EUR8;D6RFZ4	P78312;E7EUR8	Protein FAM193A	FAM193A	2363
20.2419	19.9882	19.7273	20.2764	21.5309	21.8346	21.8423	21.7471	+	LFQ intensity LSD1_LFQ intensity NLS	17	17	17	14.6	14.6	14.6	251.89	0	51.992	244000000	60	4.57215	0.00553919	1.68029	0.78266	J3KNL6;O15027;F1T0I1;A0A0C4DH09;X6RGP5;Q8N9G1	J3KNL6;O15027;F1T0I1	Protein transport protein Sec16A	SEC16A	1167
22.3376	22.0886	21.7634	21.7471	23.4425	23.7182	23.6649	23.8764	+	LFQ intensity LSD1_LFQ intensity NLS	23	23	1	23.9	23.9	1.2	164.98	0	323.31	773000000	157	4.259	0.005513	1.69132	0.780256	Q14C86;C9IZ08;B4DGD8;H0Y7I9;A0A0A0MQV8	Q14C86;C9IZ08;B4DGD8;H0Y7I9	GTPase-activating protein and VPS9 domain-containing protein 1	GAPVD1	2646
20.265	19.3667	19.6435	19.7307	21.0756	21.4972	21.4221	22.0724	+	LFQ intensity LSD1_LFQ intensity NLS	10	10	10	17.3	17.3	17.3	93.908	0	29.76	166000000	39	3.13459	0.00583607	1.76536	0.7745	Q658Y4;E7ER68;G3V120;H0YBR6;H0YC80	Q658Y4;E7ER68	Protein FAM91A1	FAM91A1	2918
18.5528	19.3012	17.9607	19.9742	21.9531	19.7971	21.2989	20.8576	+	LFQ intensity LSD1_LFQ intensity NLS	8	8	8	11.2	11.2	11.2	137.75	0	19.885	102000000	32	1.74054	0.00592558	2.02945	0.771483	Q15477;H7C5N0;H7C4L3;B4E0B4	Q15477	Helicase SKI2W	SKIV2L	2696
20.0156	19.9882	19.4273	20.4775	21.6231	21.9985	21.2764	22.0359	+	LFQ intensity LSD1_LFQ intensity NLS	9	9	9	32	32	32	45.209	0	178.88	177000000	76	3.12193	0.00591183	1.75633	0.770505	A6NKD9;H0YJE0;G3V5D5;G3V2D7;H0YJY5;G3V4C8	A6NKD9	Coiled-coil domain-containing protein 85C	CCDC85C	368
20.4476	20.9812	17.7134	18.4003	21.5356	21.0691	21.4726	22.1426	+	LFQ intensity LSD1_LFQ intensity NLS	6	6	5	21.5	21.5	19.2	39.31	0	12.605	193000000	22	1.42107	0.00589815	2.16934	0.769819	Q96GD4;J3KTD6;J3KT86;J3KRJ2;J3KRF8;J3QR41;J3QLN8;B4DXA6;A0A0A0MSY3;Q5Y191;Q9UQB9	Q96GD4;J3KTD6;J3KT86;J3KRJ2;J3KRF8;J3QR41;J3QLN8	Aurora kinase B	AURKB	3532
25.7338	25.8552	25.3844	25.6703	27.3662	27.4785	27.141	27.1984	+	LFQ intensity LSD1_LFQ intensity NLS	126	126	85	55.5	55.5	39.6	358.2	0	323.31	11800000000	1599	4.88404	0.00588453	1.63508	0.768986	P49792;F8WBP7	P49792	E3 SUMO-protein ligase RanBP2	RANBP2	2126
17.9272	17.0761	18.7728	17.5381	19.4676	19.3233	19.3921	20.8113	+	LFQ intensity LSD1_LFQ intensity NLS	4	4	4	20.6	20.6	20.6	35.431	0	5.3958	48300000	8	2.04589	0.00589569	1.92001	0.766277	Q6P2C8	Q6P2C8	Mediator of RNA polymerase II transcription subunit 27	MED27	2976
27.6998	27.6595	27.5754	27.7129	29.326	29.3494	29.0111	29.3494	+	LFQ intensity LSD1_LFQ intensity NLS	35	35	23	65.8	65.8	40.4	70.051	0	323.31	34700000000	834	5.73178	0.00586907	1.59708	0.764728	P0DMV9;P0DMV8;V9GZ37	P0DMV9;P0DMV8;V9GZ37	Heat shock 70 kDa protein 1B;Heat shock 70 kDa protein 1A	HSPA1B;HSPA1A	1716
20.5261	20.6096	20.4476	19.3193	21.7098	22.0918	21.8839	22.3403	+	LFQ intensity LSD1_LFQ intensity NLS	10	9	9	17.3	16.3	16.3	98.38	0	23.945	277000000	51	2.7577	0.0058427	1.7808	0.763324	E7ESP9;P07197;E7EMV2	E7ESP9;P07197;E7EMV2	Neurofilament medium polypeptide	NEFM	693
18.3	19.7389	18.0235	18.4299	20.343	20.9531	20.4476	20.1079	+	LFQ intensity LSD1_LFQ intensity NLS	8	8	8	13.2	13.2	13.2	101.34	0	36.166	86400000	9	2.32604	0.0060133	1.83978	0.759919	Q6ZNB6	Q6ZNB6	NF-X1-type zinc finger protein NFXL1	NFXL1	3019
17.088	18.5992	20.8499	19.9463	20.9024	21.0756	21.5777	21.5404	+	LFQ intensity LSD1_LFQ intensity NLS	7	7	7	22.4	22.4	22.4	57.548	0	18.696	152000000	23	1.3739	0.00610155	2.15316	0.75883	P49257	P49257	Protein ERGIC-53	LMAN1	2105
18.2032	18.7268	19.5074	19.252	21.417	19.2883	21.4273	21.4825	+	LFQ intensity LSD1_LFQ intensity NLS	4	3	3	14	11.2	11.2	48.897	0	3.8748	113000000	5	1.75227	0.00608811	1.98142	0.758706	Q9UN37;I3L4J1	Q9UN37;I3L4J1	Vacuolar protein sorting-associated protein 4A	VPS4A	4256
19.1078	17.4656	18.1894	18.2633	20.5451	20.4273	19.7257	19.6276	+	LFQ intensity LSD1_LFQ intensity NLS	13	3	3	16.3	3.7	3.7	127.72	0	20.819	59100000	24	2.36163	0.00607473	1.82486	0.757057	Q96HA1	Q96HA1	Nuclear envelope pore membrane protein POM 121	POM121	3542
22.002	21.6497	21.7056	22.1015	23.2961	23.391	23.5638	23.654	+	LFQ intensity LSD1_LFQ intensity NLS	30	30	29	21.2	21.2	20.4	242.56	0	122.4	733000000	158	4.64099	0.00631808	1.61158	0.754109	Q96N67;A0A0C4DGY6;H0Y7L2;A2A369;Q96HP0	Q96N67;A0A0C4DGY6	Dedicator of cytokinesis protein 7	DOCK7	3588
18.1612	18.9407	17.7058	18.4507	19.5802	20.2764	20.1703	20.1703	+	LFQ intensity LSD1_LFQ intensity NLS	8	8	8	14.8	14.8	14.8	113.42	0	17.341	62700000	12	2.90543	0.00643478	1.73473	0.753071	O43303;I3L262	O43303	Centriolar coiled-coil protein of 110 kDa	CCP110	1387
17.6037	18.0271	17.5047	16.7165	19.4252	18.1756	19.9742	19.6954	+	LFQ intensity LSD1_LFQ intensity NLS	4	4	4	13	13	13	71.078	0	6.3387	47200000	9	2.07193	0.00647537	1.85463	0.747262	Q8NEC7;D6R9W2;D6RCC4;D6RCC9	Q8NEC7;D6R9W2	Glutathione S-transferase C-terminal domain-containing protein	GSTCD	3277	+
17.3002	18.3744	18.1722	17.9208	19.2877	19.3815	19.6276	20.5545	+	LFQ intensity LSD1_LFQ intensity NLS	4	4	4	18.8	18.8	18.8	46.105	0	8.3423	106000000	30	2.50655	0.00643404	1.77093	0.74667	P32121;I3L412;Q68DZ5;K7ENA6;K7EL17	P32121;I3L412;Q68DZ5;K7ENA6	Beta-arrestin-2	ARRB2;DKFZp686L0365	1953
18.2181	18.7511	18.3628	18.1078	21.1269	20.4576	18.6928	20.6971	+	LFQ intensity LSD1_LFQ intensity NLS	8	8	8	37.2	37.2	37.2	31.274	0	22.129	78600000	29	1.84118	0.0068847	1.88366	0.737742	Q6ZTW0	Q6ZTW0	Tubulin polyglutamylase complex subunit 1	TPGS1	3023
17.7693	19.6204	18.3762	17.9707	20.4972	19.6869	20.4676	20.3321	+	LFQ intensity LSD1_LFQ intensity NLS	5	5	5	25.2	25.2	25.2	34.551	0	7.1502	72900000	11	2.13259	0.00687029	1.81177	0.737574	Q8TDX7;F8WAG2;Q5TBH0;Q5TBG1;Q5TBG7;Q5TBH2;Q5TBH1;Q9HC98;C9J1H8;F5H3U7	Q8TDX7	Serine/threonine-protein kinase Nek7	NEK7	3330
20.4375	19.0668	20.2535	20.3962	21.7715	21.7512	21.4874	21.9882	+	LFQ intensity LSD1_LFQ intensity NLS	13	13	13	21.5	21.5	21.5	119.54	0	69.936	209000000	54	2.61172	0.00733196	1.71107	0.730598	O60566;H0YN44	O60566	Mitotic checkpoint serine/threonine-protein kinase BUB1 beta	BUB1B	1443
20.9316	21.1642	19.724	20.6186	22.4324	22.2477	22.3017	22.2302	+	LFQ intensity LSD1_LFQ intensity NLS	18	18	18	21	21	21	141.52	0	90.603	453000000	136	2.74148	0.00731687	1.6934	0.730247	Q9UHF7;E5RFF3;E5RJ97;H0YC29;H0YAV4;C9J6L7;E7EVN4;F8W8T0	Q9UHF7;E5RFF3;E5RJ97;H0YC29	Zinc finger transcription factor Trps1	TRPS1	4189
19.6293	20.0559	18.8345	19.7157	20.8651	21.4273	21.3592	21.2185	+	LFQ intensity LSD1_LFQ intensity NLS	9	9	9	18.6	18.6	18.6	80.049	0	22.11	181000000	42	2.9294	0.00734809	1.65866	0.725206	A0A0C4DGG3;Q8NHM5	A0A0C4DGG3;Q8NHM5	Lysine-specific demethylase 2B	KDM2B	296
19.5261	19.6818	20.9742	19.9882	21.5498	21.4576	21.8034	22.2036	+	LFQ intensity LSD1_LFQ intensity NLS	8	8	8	18.2	18.2	18.2	69.223	0	27.202	196000000	42	2.47043	0.00742285	1.71106	0.723378	O76031	O76031	ATP-dependent Clp protease ATP-binding subunit clpX-like, mitochondrial	CLPX	1533
21.2302	20.895	20.8499	20.8576	22.6865	22.4726	22.4298	22.3511	+	LFQ intensity LSD1_LFQ intensity NLS	12	12	12	47.6	47.6	47.6	46.359	0	80.569	324000000	88	4.92491	0.00763273	1.52679	0.721539	Q8IX90;F5GWG1;F5H8H7	Q8IX90	Spindle and kinetochore-associated protein 3	SKA3	3172
17.9249	18.8936	18.5315	18.8579	20.3857	19.9601	20.0292	20.2989	+	LFQ intensity LSD1_LFQ intensity NLS	9	9	9	9.8	9.8	9.8	136.92	0	20.408	88000000	28	3.21764	0.00757228	1.61655	0.719492	Q9NSV4	Q9NSV4	Protein diaphanous homolog 3	DIAPH3	4021
21.9531	21.3962	22.5777	21.4375	23.1961	23.2678	23.8481	23.7286	+	LFQ intensity LSD1_LFQ intensity NLS	41	41	41	21.7	21.7	21.7	331.77	0	264.8	779000000	183	2.69667	0.00754241	1.66903	0.71915	P15924	P15924	Desmoplakin	DSP	1785
18.1968	17.721	18.621	19.298	20.2764	19.8591	20.1581	20.2989	+	LFQ intensity LSD1_LFQ intensity NLS	4	4	3	7.6	7.6	6.2	76.797	0	4.8098	69200000	8	2.53681	0.0076378	1.68894	0.718833	E9PEI4;H0YB16;H0YBZ1;H0YBP1;E7ESA6;Q05397;B4DWJ1;E5RI03;E5RJQ2;E5RG80	E9PEI4;H0YB16;H0YBZ1;H0YBP1;E7ESA6;Q05397;B4DWJ1	Focal adhesion kinase 1	PTK2	689
25.8528	25.1055	25.5609	25.6513	26.9869	27.1312	26.9428	27.3992	+	LFQ intensity LSD1_LFQ intensity NLS	100	100	82	48.6	48.6	40.4	226.53	0	323.31	8680000000	1193	3.79214	0.00762279	1.57238	0.718464	P35579;Q5BKV1;B1AH99;E7ERA5	P35579	Myosin-9	MYH9	1982
22.6627	22.5189	21.8423	22.0526	23.7077	24.1795	23.654	23.9134	+	LFQ intensity LSD1_LFQ intensity NLS	21	21	21	69.6	69.6	69.6	61.594	0	134.81	911000000	186	3.38405	0.00766537	1.59451	0.716076	O95817;C9JFK9	O95817	BAG family molecular chaperone regulator 3	BAG3	1603
20.7876	20.9024	22.5685	21.9243	23.0526	22.8708	23.5869	23.7389	+	LFQ intensity LSD1_LFQ intensity NLS	12	12	12	35.4	35.4	35.4	48.55	0	45.774	570000000	74	2.00945	0.00793023	1.76661	0.714025	Q15645;H0YAL2	Q15645	Pachytene checkpoint protein 2 homolog	TRIP13	2707
20.5638	20.4375	19.3624	20.3857	21.8764	22.0724	21.928	21.4375	+	LFQ intensity LSD1_LFQ intensity NLS	20	20	20	16.1	16.1	16.1	212.71	0	90.693	233000000	68	2.73939	0.00861776	1.64119	0.710655	R4GNB2;R4GN35;Q5VZ89;X6RAE7;X6R5W5;A0A0A0MRX3;R4GMN2	R4GNB2;R4GN35;Q5VZ89	DENN domain-containing protein 4C	DENND4C	4401
20.9243	21.3857	21.3752	19.9054	22.538	22.48	22.5915	22.6584	+	LFQ intensity LSD1_LFQ intensity NLS	19	19	19	12.6	12.6	12.6	276.9	0	90.483	438000000	73	2.50994	0.00860116	1.66932	0.710387	Q12923	Q12923	Tyrosine-protein phosphatase non-receptor type 13	PTPN13	2498
17.9066	19.7553	17.6183	17.4065	20.0156	20.1206	19.9316	19.8377	+	LFQ intensity LSD1_LFQ intensity NLS	6	6	6	14.3	14.3	14.3	92.819	0	9.8431	105000000	20	1.80397	0.00858462	1.80469	0.7102	Q3KQU3;E9PLH3;C9JIR3;H0YF21	Q3KQU3	MAP7 domain-containing protein 1	MAP7D1	2773
20.1206	17.4264	19.4894	19.649	21.9742	20.7634	21.5117	20.1457	+	LFQ intensity LSD1_LFQ intensity NLS	10	10	10	23.8	23.8	23.8	90.309	0	68.953	107000000	23	1.43403	0.00856814	1.92743	0.708431	E9PG22;Q8IW35;F8WF91;H7C4Y5	E9PG22;Q8IW35	Centrosomal protein of 97 kDa	CEP97	746
20.3645	20.343	21.0821	18.556	21.7389	21.6497	21.823	22.3936	+	LFQ intensity LSD1_LFQ intensity NLS	9	9	7	11.8	11.8	9.4	121.74	0	40.044	259000000	41	1.74078	0.00851908	1.81488	0.707876	Q9Y3P9	Q9Y3P9	Rab GTPase-activating protein 1	RABGAP1	4332
18.9882	19.1994	18.9937	19.8469	20.9951	21.002	20.7634	20.5638	+	LFQ intensity LSD1_LFQ intensity NLS	26	26	26	10.2	10.2	10.2	404.23	0	74.133	222000000	48	3.33833	0.00845455	1.57404	0.706413	Q70CQ2;A0A0C4DG73;H7C183;H7C150	Q70CQ2	Ubiquitin carboxyl-terminal hydrolase 34	USP34	3029
20.7715	21.4118	19.6293	20.1581	22.5685	22.2678	21.7594	22.1856	+	LFQ intensity LSD1_LFQ intensity NLS	9	1	1	17.6	3.9	3.9	44.348	0	16.816	196000000	40	2.17519	0.00872932	1.70263	0.703629	Q58FF8	Q58FF8	Putative heat shock protein HSP 90-beta 2	HSP90AB2P	2804
21.4874	21.4676	21.0493	20.9459	22.821	22.9424	22.8932	22.4273	+	LFQ intensity LSD1_LFQ intensity NLS	21	21	21	33	33	33	118.56	0	133.53	722000000	125	3.80676	0.00869663	1.53341	0.702512	Q63HK5	Q63HK5	Teashirt homolog 3	TSHZ3	2916
17.6889	19.528	20.002	19.8238	21.265	21.2477	20.6971	20.9951	+	LFQ intensity LSD1_LFQ intensity NLS	11	11	11	14.3	14.3	14.3	138.6	0	27.98	92700000	33	1.76291	0.00868037	1.79057	0.702361	O15357;A0A0A0MTP6;F5GY16;H7BXR2;F5H588	O15357;A0A0A0MTP6	Phosphatidylinositol 3,4,5-trisphosphate 5-phosphatase 2	INPPL1	1364
20.8191	21.1642	19.9742	19.7569	22.3294	22.0156	21.9243	22.0326	+	LFQ intensity LSD1_LFQ intensity NLS	30	20	20	16.4	13	13	305.41	0	247.07	259000000	79	2.49939	0.00863197	1.64685	0.701718	Q8TD26;C9JFU2;H7C294	Q8TD26	Chromodomain-helicase-DNA-binding protein 6	CHD6	3325
20.7389	19.8921	18.27	19.3649	21.5961	21.2764	21.1269	21.3266	+	LFQ intensity LSD1_LFQ intensity NLS	14	14	14	17.5	17.5	17.5	140.02	0	219.64	155000000	46	1.81573	0.00871193	1.76503	0.698809	Q8NDI1;C9K0H9;B5MC86;Q8N3D4;C9J268;C9IYU2;E9PSB0;H7BZ98;H0YDZ9;E9PIH6	Q8NDI1	EH domain-binding protein 1	EHBP1	3270
17.1991	18.4951	17.9488	19.7106	20.0691	19.6886	20.6453	20.0821	+	LFQ intensity LSD1_LFQ intensity NLS	9	9	9	14	14	14	110.5	0	43.443	79600000	15	1.70772	0.00883789	1.78287	0.695222	Q96A65	Q96A65	Exocyst complex component 4	EXOC4	3463
24.3645	25.5492	25.5344	25.1055	26.0833	27.1115	27.0505	26.8858	+	LFQ intensity LSD1_LFQ intensity NLS	171	171	171	56.4	56.4	56.4	629.09	0	323.31	7420000000	1258	2.38497	0.00882182	1.64435	0.69507	Q09666;E9PJZ0;E9PKR9;E9PJC6;E9PLK4;E9PQE3	Q09666	Neuroblast differentiation-associated protein AHNAK	AHNAK	2473
18.3879	20.8034	20.417	19.0213	21.3045	21.7836	21.5117	21.2006	+	LFQ intensity LSD1_LFQ intensity NLS	21	21	21	14.9	14.9	14.9	235.31	0	150.94	247000000	63	1.65596	0.00897101	1.79272	0.693538	Q8NFU7	Q8NFU7	Methylcytosine dioxygenase TET1	TET1	3292
19.0008	17.1027	18.9868	18.5905	22.1426	20.0156	20.265	18.9906	+	LFQ intensity LSD1_LFQ intensity NLS	4	4	4	54.2	54.2	54.2	6.3304	0	6.0956	93900000	11	1.29031	0.00896948	1.93326	0.691441	E5RGN3;E5RIM7;O00244	E5RGN3;E5RIM7;O00244	Copper transport protein ATOX1	ATOX1	649
21.4118	20.8034	21.9424	21.5961	22.8839	22.9079	22.8839	23.3239	+	LFQ intensity LSD1_LFQ intensity NLS	26	26	26	26.2	26.2	26.2	191.48	0	199.32	409000000	102	3.00132	0.00916846	1.56149	0.690348	Q02952	Q02952	A-kinase anchor protein 12	AKAP12	2429
21.6364	20.7796	20.2989	20.5451	22.5961	22.1111	22.4849	22.4093	+	LFQ intensity LSD1_LFQ intensity NLS	15	15	13	35.1	35.1	32.4	75.186	0	111.55	628000000	101	2.66766	0.00949201	1.58532	0.686636	O14640;A0A087WWA7;P54792	O14640;A0A087WWA7;P54792	Segment polarity protein dishevelled homolog DVL-1;Putative segment polarity protein dishevelled homolog DVL1P1	DVL1;DVL1P1	1314
17.3836	17.6967	18.2035	17.6453	19.6523	19.4435	18.5842	19.5526	+	LFQ intensity LSD1_LFQ intensity NLS	4	4	4	13	13	13	49.669	0	24.416	22600000	7	2.72501	0.00955044	1.57587	0.685449	O95396	O95396	Adenylyltransferase and sulfurtransferase MOCS3;Molybdopterin-synthase adenylyltransferase;Molybdopterin-synthase sulfurtransferase	MOCS3	1575
21.2006	20.7876	20.0156	20.1825	21.7915	22.4298	21.8538	22.4996	+	LFQ intensity LSD1_LFQ intensity NLS	12	12	12	32.2	32.2	32.2	96.723	0	105.41	434000000	61	2.53216	0.00953357	1.5971	0.685078	Q9UPN7	Q9UPN7	Serine/threonine-protein phosphatase 6 regulatory subunit 1	PPP6R1	4267
23.6096	23.6096	23.3376	23.7995	24.9672	25.0443	24.945	25.1757	+	LFQ intensity LSD1_LFQ intensity NLS	25	25	25	48.5	48.5	48.5	71.45	0	173.52	2140000000	315	4.95651	0.0096649	1.44397	0.684875	Q9Y5K6	Q9Y5K6	CD2-associated protein	CD2AP	4364
16.8667	16.777	18.6592	18.6226	19.1053	19.3211	19.2185	20.343	+	LFQ intensity LSD1_LFQ intensity NLS	5	5	5	16.8	16.8	16.8	51.727	0	28.753	41800000	12	1.59294	0.0100244	1.76558	0.679591	Q9HAD4;H0YAA3;H0YAI6;D6RA22;D6RJA5;D6RH33;D6R9E7;D6RB94;B4DK73;H0Y9Z3;B4DHS8;D6RE66;A0A0C4DG28;D6RIX6;D6R9M1;D6RBY6	Q9HAD4;H0YAA3	WD repeat-containing protein 41	WDR41	3932
21.2302	20.1581	18.2522	20.2419	21.5961	21.7715	21.5685	22.1047	+	LFQ intensity LSD1_LFQ intensity NLS	24	5	5	49.9	8.7	8.7	57.718	0	143.77	247000000	46	1.51811	0.010007	1.78958	0.679292	B2RB02	B2RB02		EPB41L3	422
20.4972	20.6627	20.4476	20.1581	22.1079	21.6186	21.9637	21.9061	+	LFQ intensity LSD1_LFQ intensity NLS	9	9	9	23.5	23.5	23.5	71.648	0	23.243	312000000	60	4.21832	0.00997222	1.45768	0.678974	Q9ULX6;V9GZ50;M0R1Y5;M0QYT7;M0R010	Q9ULX6	A-kinase anchor protein 8-like	AKAP8L	4251
20.5261	20.6364	19.6417	20.1946	21.6671	21.7307	21.928	21.7265	+	LFQ intensity LSD1_LFQ intensity NLS	16	16	2	27.6	27.6	3.5	110.67	0	32.998	281000000	55	3.22336	0.00995494	1.51333	0.678478	Q6ZRI6	Q6ZRI6	Uncharacterized protein C15orf39	C15orf39	3020
17.8137	18.2475	20.3752	20.5261	21.8034	20.9098	20.2877	21.4825	+	LFQ intensity LSD1_LFQ intensity NLS	5	5	5	18.5	18.5	18.5	44.23	0	19.125	111000000	26	1.27987	0.0102176	1.88021	0.676378	Q13561;F8VW18;F8W1I6;F8VRV7;H0YI98;H0YHL1;F8VX93	Q13561;F8VW18;F8W1I6;F8VRV7;H0YI98	Dynactin subunit 2	DCTN2	2563
18.9232	18.2909	19.3806	19.6435	20.417	20.5823	20.5165	20.9882	+	LFQ intensity LSD1_LFQ intensity NLS	4	4	4	10.1	10.1	10.1	59.356	0	11.458	106000000	15	2.55313	0.0102268	1.56646	0.67469	Q8WVX9;E9PNW8;E9PPB8	Q8WVX9;E9PNW8	Fatty acyl-CoA reductase 1	FAR1	3368
20.0691	20.265	20.2877	17.542	20.9098	21.2185	21.5498	21.7471	+	LFQ intensity LSD1_LFQ intensity NLS	11	11	11	14	14	14	128.4	0	33.738	190000000	37	1.40191	0.0103082	1.81534	0.674064	Q9P2R3;I3L1Z9;I3L3P8	Q9P2R3	Rabankyrin-5	ANKFY1	4142
21.1015	21.0951	20.002	20.417	22.3403	22.155	22.002	22.2361	+	LFQ intensity LSD1_LFQ intensity NLS	19	19	19	27.1	27.1	27.1	136.86	0	318.97	260000000	96	2.80855	0.0106348	1.52945	0.670967	F8W7U3;E7ESD2;Q5SNT6;Q641Q2;A0A087WYF6;A0A0A0MR88;A0A096LPC5;J3KP36;Q9Y4E1;A0A0A0MT65;Q5SRD0;B1AP61	F8W7U3;E7ESD2;Q5SNT6;Q641Q2;A0A087WYF6;A0A0A0MR88;A0A096LPC5;J3KP36;Q9Y4E1	WASH complex subunit FAM21B;WASH complex subunit FAM21A;WASH complex subunit FAM21C	FAM21A;FAM21B;FAM21C	690
18.7039	19.1206	19.6024	18.5878	19.9316	20.6186	20.4273	21.4476	+	LFQ intensity LSD1_LFQ intensity NLS	9	9	9	48.4	48.4	48.4	31.844	0	44.13	139000000	51	2.19847	0.0106167	1.60258	0.670387	O75461;F8WC40;F8WEZ5;Q2Z196;Q2Z197	O75461	Transcription factor E2F6	E2F6	1498
17.8423	18.5951	18.6453	18.078	19.6006	19.901	19.4835	20.2302	+	LFQ intensity LSD1_LFQ intensity NLS	10	10	10	29.4	29.4	29.4	56.051	0	28.311	239000000	44	2.96306	0.0105986	1.51364	0.670291	Q6SPF0;E9PIW9;F8WDT5	Q6SPF0;E9PIW9	Atherin	SAMD1	2999
21.68	21.4476	21.8913	21.743	22.9864	23.0756	23.0559	23.2961	+	LFQ intensity LSD1_LFQ intensity NLS	14	14	13	35.9	35.9	32.3	57.255	0	146.07	529000000	87	4.77285	0.0107609	1.41302	0.668396	Q12800;F8VWL0;F8VX55;Q9NZI6	Q12800;F8VWL0;F8VX55	Alpha-globin transcription factor CP2	TFCP2	2484
18.9691	17.8151	19.0209	19.0633	20.1581	20.2877	20.3101	20.265	+	LFQ intensity LSD1_LFQ intensity NLS	4	4	4	28.5	28.5	28.5	30.382	0	9.4445	41400000	10	2.64207	0.0108437	1.53808	0.667813	Q9Y478;F5H2X8;O43741	Q9Y478	5-AMP-activated protein kinase subunit beta-1	PRKAB1	4340
20.343	20.1457	20.0156	20.8191	21.6928	21.5545	22.0756	21.895	+	LFQ intensity LSD1_LFQ intensity NLS	7	7	7	14.7	14.7	14.7	66.432	0	28.197	215000000	33	3.37981	0.0109816	1.47365	0.666831	X6RLT1;H0UI80;Q8IXH7	X6RLT1;H0UI80;Q8IXH7	Negative elongation factor C/D	NELFCD;TH1L	987
21.8307	21.8385	21.1703	21.6276	22.9812	23.0821	22.9985	23.1612	+	LFQ intensity LSD1_LFQ intensity NLS	23	23	23	23.9	23.9	23.9	194	0	285.3	600000000	195	3.94538	0.0109267	1.43897	0.66557	Q9UPQ9;H0Y720	Q9UPQ9;H0Y720	Trinucleotide repeat-containing gene 6B protein	TNRC6B	4269
22.3988	22.3348	22.2419	20.9672	22.9707	23.5285	23.8481	24.002	+	LFQ intensity LSD1_LFQ intensity NLS	28	28	28	24.6	24.6	24.6	153.89	0	95.57	1010000000	178	2.10002	0.010995	1.60161	0.664512	Q92878;E7ESD9;E7EN38;E9PM98;H7C0P8;C9JNH8	Q92878	DNA repair protein RAD50	RAD50	3425
17.4864	17.7537	18.6721	17.3566	19.2372	19.3145	19.3645	19.4536	+	LFQ intensity LSD1_LFQ intensity NLS	4	3	3	5.4	4.6	4.6	106.9	0	6.1876	55900000	20	2.64539	0.0110744	1.52527	0.663109	A0A087WXD2;H7C5T8;H7C4U7;H7C535;A0A087WT53;Q96QZ7	A0A087WXD2;H7C5T8;H7C4U7;H7C535;A0A087WT53;Q96QZ7	Membrane-associated guanylate kinase, WW and PDZ domain-containing protein 1	MAGI1	25
18.5731	19.8269	19.002	19.0238	20.2419	20.8346	20.6186	20.8191	+	LFQ intensity LSD1_LFQ intensity NLS	6	6	6	25.8	25.8	25.8	45.251	0	14.763	86800000	32	2.67328	0.0110561	1.52213	0.663023	Q92643;B1AK81;A6NEM5	Q92643;B1AK81;A6NEM5	GPI-anchor transamidase	PIGK	3412
20.8651	21.2244	21.8576	20.2535	22.4996	22.3962	22.5731	22.9847	+	LFQ intensity LSD1_LFQ intensity NLS	9	9	9	14.1	14.1	14.1	75.475	0	31.894	393000000	82	2.31609	0.0110379	1.56327	0.662547	P28288	P28288	ATP-binding cassette sub-family D member 3	ABCD3	1909
23.0526	22.8557	23.2535	23.1222	24.5225	24.3645	24.391	24.5463	+	LFQ intensity LSD1_LFQ intensity NLS	53	53	49	18.2	18.2	17.2	481.89	0	278.23	1380000000	309	5.19088	0.0109836	1.3851	0.661216	Q7Z6Z7;H0Y659;Q5H963;A0A087X146	Q7Z6Z7	E3 ubiquitin-protein ligase HUWE1	HUWE1	3086
20.0951	21.0625	18.9982	21.4526	22.1856	22.2792	22.0789	21.823	+	LFQ intensity LSD1_LFQ intensity NLS	11	9	9	28.5	25.8	25.8	78.054	0	24.523	426000000	63	1.63867	0.0110507	1.68957	0.660795	Q92997;F8WCF1;C9K0P9	Q92997	Segment polarity protein dishevelled homolog DVL-3	DVL3	3441
19.3145	18.4642	18.5815	19.3702	20.4576	21.3045	20.7223	19.6347	+	LFQ intensity LSD1_LFQ intensity NLS	2	2	2	14.5	14.5	14.5	24.495	0	9.7428	122000000	28	2.04557	0.0111699	1.59718	0.659802	H0YEL0;O14893;G5EA29;H0YDP6	H0YEL0;O14893;G5EA29;H0YDP6	Gem-associated protein 2	GEMIN2	1029
20.4874	20.68	17.7665	20.2066	21.9098	21.5069	21.6627	21.1642	+	LFQ intensity LSD1_LFQ intensity NLS	16	16	3	20.4	20.4	4.1	138.13	0	43.974	253000000	72	1.35912	0.0113766	1.77579	0.658297	E7EQ57;E7EUL6;H9KVD4;Q8IU84;E9PGE9;E7EU48;E7EPY2;C9JU02;E7ERX0;Q13465	E7EQ57;E7EUL6		MECOM	676
23.1395	23.3239	22.5731	23.1871	24.5522	24.4551	24.48	24.4425	+	LFQ intensity LSD1_LFQ intensity NLS	71	71	71	33.2	33.2	33.2	384.22	0	323.31	1570000000	326	3.84445	0.0113582	1.42657	0.658194	P51587	P51587	Breast cancer type 2 susceptibility protein	BRCA2	2164
22.6907	22.3156	22.3073	21.7265	24.0691	23.8764	23.6865	23.3376	+	LFQ intensity LSD1_LFQ intensity NLS	16	16	16	45.2	45.2	45.2	46.676	0	121.65	1000000000	168	2.96305	0.0113398	1.48234	0.657986	Q9NZC7;A0A087WZG5;F5H3R5	Q9NZC7	WW domain-containing oxidoreductase	WWOX	4105
20.6276	21.2302	21.4676	21.0559	22.2066	22.6453	22.4874	22.9006	+	LFQ intensity LSD1_LFQ intensity NLS	31	31	31	19.2	19.2	19.2	251.46	0	75.883	516000000	107	3.15993	0.0113215	1.46462	0.657007	Q8N3C0;E5RFZ0;J3KNJ4	Q8N3C0	Activating signal cointegrator 1 complex subunit 3	ASCC3	3215
18.5853	17.7105	19.614	19.5164	21.6627	22.6497	18.5663	20.3752	+	LFQ intensity LSD1_LFQ intensity NLS	9	2	2	62.8	8.5	8.5	10.807	1	-2	273000000	16	1.02169	0.0113871	1.9569	0.654761	A0A087X0W4;A0A087WVR6	A0A087X0W4		ACACA	145
19.6204	17.8968	19.0795	19.5375	20.5165	20.2764	20.9601	20.6971	+	LFQ intensity LSD1_LFQ intensity NLS	9	9	7	22.1	22.1	18.6	67.585	0	23.384	109000000	24	2.0149	0.0115328	1.57898	0.651773	P10398;Q96II5	P10398;Q96II5	Serine/threonine-protein kinase A-Raf	ARAF	1719
17.515	19.1507	17.7339	18.042	19.9459	20.6186	19.6258	18.7916	+	LFQ intensity LSD1_LFQ intensity NLS	5	5	5	17	17	17	40.746	0	7.8515	90900000	18	1.68279	0.0117965	1.63509	0.647515	P55039;A8MZF9;J3KRL5;J3QL90;J3QR71;J3QKV7;J3QRI9;J3QKW7	P55039;A8MZF9	Developmentally-regulated GTP-binding protein 2	DRG2	2217
20.7056	20.8269	20.9672	20.265	21.7836	21.8987	22.3156	22.5451	+	LFQ intensity LSD1_LFQ intensity NLS	14	14	14	10.4	10.4	10.4	216.5	0	33.184	277000000	66	3.08175	0.0117405	1.4446	0.646669	Q9H1A4;H0Y564;F8WAS1	Q9H1A4;H0Y564	Anaphase-promoting complex subunit 1	ANAPC1	3839
20.9601	18.1341	19.2635	18.367	20.7389	21.002	20.8423	20.9742	+	LFQ intensity LSD1_LFQ intensity NLS	8	8	8	11.5	11.5	11.5	128.41	0	20.174	112000000	13	1.4215	0.0120945	1.70815	0.64607	Q9Y2H2	Q9Y2H2	Phosphatidylinositide phosphatase SAC2	INPP5F	4299
19.7157	19.1282	19.3145	19.6575	20.9171	20.9672	21.0951	20.4972	+	LFQ intensity LSD1_LFQ intensity NLS	8	6	6	19.9	16.7	16.7	73.051	0	24.815	103000000	31	3.51031	0.0120755	1.41516	0.645956	P04049;H7C155;H7C560;P15056;A0A0B4J1W9	P04049;H7C155	RAF proto-oncogene serine/threonine-protein kinase	RAF1	1642
24.8044	25.1871	24.8044	24.6865	26.2891	26.0772	26.239	26.3612	+	LFQ intensity LSD1_LFQ intensity NLS	32	32	32	53.9	53.9	53.9	70.171	0	323.31	5300000000	510	4.4744	0.0121444	1.37106	0.645314	Q96EA4;H0YBG5;D6RC83;D6RIF7;D6RIB8;D6R936;D6REZ1;D6RCL1;D6RDK5	Q96EA4	Protein Spindly	SPDL1	3505
18.1528	20.6714	18.445	20.9672	20.9098	21.5915	21.2877	21.5261	+	LFQ intensity LSD1_LFQ intensity NLS	11	11	9	21.1	21.1	18.9	87.208	0	38.845	167000000	30	1.25205	0.0121064	1.76965	0.64385	Q13033;G3V340;G3V3G7;H0YJT2	Q13033	Striatin-3	STRN3	2509
21.8461	21.1581	20.8499	21.0292	22.5685	22.5846	22.6606	22.7715	+	LFQ intensity LSD1_LFQ intensity NLS	28	28	28	36.2	36.2	36.2	120.27	0	204.82	561000000	114	3.16454	0.0125607	1.42547	0.641333	Q86V48;E5RFK8;E5RHU7	Q86V48	Leucine zipper protein 1	LUZP1	3111
17.3425	19.0451	17.8202	19.7853	20.1079	19.8995	19.9112	20.7223	+	LFQ intensity LSD1_LFQ intensity NLS	3	3	1	8.4	8.4	1.6	71.504	0	5.1624	59500000	6	1.51162	0.0125412	1.66194	0.641277	R4GNG3;Q14161	R4GNG3;Q14161	ARF GTPase-activating protein GIT2	GIT2	2598
18.8817	17.7627	19.7207	19.8018	20.3211	20.5545	20.6714	21.0156	+	LFQ intensity LSD1_LFQ intensity NLS	7	7	7	7.2	7.2	7.2	155.98	0	21.501	124000000	36	1.74369	0.0125635	1.59896	0.640626	Q9H2M9	Q9H2M9	Rab3 GTPase-activating protein non-catalytic subunit	RAB3GAP2	3851
24.8481	25.0608	24.8142	24.9134	26.3393	26.2077	26.4073	26.0484	+	LFQ intensity LSD1_LFQ intensity NLS	93	93	93	51.3	51.3	51.3	265.39	0	323.31	6220000000	971	5.07357	0.0126173	1.34154	0.640006	Q8NG31;E9PPJ1;H0YCZ2;H0YEY7;H0YN41	Q8NG31;E9PPJ1;H0YCZ2	Protein CASC5	CASC5	3295
18.0389	19.0532	18.5953	19.3211	21.5117	20.8191	21.0224	18.5825	+	LFQ intensity LSD1_LFQ intensity NLS	6	6	6	13.2	13.2	13.2	79.274	0	28.68	62300000	16	1.29973	0.0126831	1.7318	0.639422	Q9Y223	Q9Y223	Bifunctional UDP-N-acetylglucosamine 2-epimerase/N-acetylmannosamine kinase;UDP-N-acetylglucosamine 2-epimerase (hydrolyzing);N-acetylmannosamine kinase	GNE	4286
19.5897	20.1079	19.6714	19.6903	21.4676	20.895	21.5165	20.8346	+	LFQ intensity LSD1_LFQ intensity NLS	9	9	9	12.7	12.7	12.7	131.29	0	28.079	142000000	39	3.21726	0.0130184	1.41363	0.637962	Q86YC2	Q86YC2	Partner and localizer of BRCA2	PALB2	3138
21.3805	21.654	21.1703	21.654	22.6779	22.7995	22.9098	22.9024	+	LFQ intensity LSD1_LFQ intensity NLS	25	25	25	27.7	27.7	27.7	181.79	0	228.78	496000000	129	4.35673	0.0129985	1.35766	0.637584	Q9C0C2;E9PKK0;E9PKE7	Q9C0C2	182 kDa tankyrase-1-binding protein	TNKS1BP1	3805
22.3403	22.5685	22.6298	22.7182	23.5165	24.002	23.9406	24.4041	+	LFQ intensity LSD1_LFQ intensity NLS	36	36	36	38.7	38.7	38.7	128.98	0	151.59	885000000	195	3.39063	0.0129786	1.4016	0.637452	Q8WUM0	Q8WUM0	Nuclear pore complex protein Nup133	NUP133	3355
19.9601	20.5823	19.1531	18.9065	21.0559	21.502	21.4015	20.7955	+	LFQ intensity LSD1_LFQ intensity NLS	6	6	6	10	10	10	141.18	0	18.384	157000000	40	1.99305	0.0132763	1.5382	0.636564	C9K0J5;Q70E73;C9J164	C9K0J5;Q70E73;C9J164	Ras-associated and pleckstrin homology domains-containing protein 1	RAPH1	577
21.9352	22.1363	21.5869	21.68	23.1825	23.0359	23.1642	23.4041	+	LFQ intensity LSD1_LFQ intensity NLS	20	20	20	35.2	35.2	35.2	71.639	0	120.36	591000000	102	4.06242	0.0134146	1.36207	0.63464	A0MZ66	A0MZ66	Shootin-1	KIAA1598	337
23.5404	23.1285	22.8839	22.6822	24.4738	24.654	24.3031	24.3712	+	LFQ intensity LSD1_LFQ intensity NLS	48	48	15	39.6	39.6	14.8	194.1	0	323.31	1690000000	359	3.36133	0.0138545	1.39181	0.632689	Q8IZH2;C9JCZ8;F8WDA0	Q8IZH2	5-3 exoribonuclease 1	XRN1	3196
19.2442	20.895	19.3167	19.6971	21.3699	20.714	21.7715	21.4775	+	LFQ intensity LSD1_LFQ intensity NLS	11	10	10	23.6	22.7	22.7	86.131	0	34.582	136000000	38	1.88749	0.0139244	1.54495	0.632537	O43815	O43815	Striatin	STRN	1414
20.9742	20.6971	21.4476	20.1946	22.1612	22.0854	22.4775	22.3403	+	LFQ intensity LSD1_LFQ intensity NLS	8	8	8	37.1	37.1	37.1	29.892	0	51.871	375000000	74	2.69557	0.0143133	1.43771	0.631543	A0A0A0MQS1;Q53H96;B5MD87;F8WEI0	A0A0A0MQS1;Q53H96;B5MD87	Pyrroline-5-carboxylate reductase;Pyrroline-5-carboxylate reductase 3	PYCRL	179
17.4738	19.6311	17.3035	19.1195	20.0691	20.1703	19.4456	20.4375	+	LFQ intensity LSD1_LFQ intensity NLS	6	6	6	13.7	13.7	13.7	99.692	0	10.056	105000000	23	1.42379	0.0143928	1.64862	0.629113	A0JP02;B4DJX4;Q9HAU0;H0YGJ6	A0JP02;B4DJX4;Q9HAU0	Pleckstrin homology domain-containing family A member 5	PLEKHA5	336
19.9459	20.6714	20.0951	20.7223	21.9882	21.8307	21.7755	21.4425	+	LFQ intensity LSD1_LFQ intensity NLS	11	11	11	10.7	10.7	10.7	174.88	0	97.471	148000000	23	3.06177	0.0145449	1.40056	0.6284	Q14160;H0YCG0;H0YDF9;Q5T0G3;Q9BTT6	Q14160	Protein scribble homolog	SCRIB	2597
20.7715	19.7439	21.6928	19.668	22.1047	21.8423	21.8307	22.3403	+	LFQ intensity LSD1_LFQ intensity NLS	12	12	3	19.3	19.3	4.4	112.96	0	25.377	286000000	48	1.70633	0.0146924	1.56045	0.625574	O15084	O15084	Serine/threonine-protein phosphatase 6 regulatory ankyrin repeat subunit A	ANKRD28	1348
22.2593	21.714	21.7265	21.7876	23.5638	23.3511	23.0999	22.9388	+	LFQ intensity LSD1_LFQ intensity NLS	19	19	19	30.9	30.9	30.9	106.33	0	139.37	664000000	122	3.44378	0.0147715	1.36658	0.624156	B9EGE7;Q8TCN5	B9EGE7;Q8TCN5	Zinc finger protein 507	ZNF507	502
22.6714	22.9043	21.6928	22.6029	23.7895	24.0275	23.8481	23.867	+	LFQ intensity LSD1_LFQ intensity NLS	34	34	34	38.6	38.6	38.6	154.29	0	323.31	1420000000	303	2.70437	0.0147278	1.41518	0.62313	Q14207;H0YET3;E9PKJ1	Q14207	Protein NPAT	NPAT	2605
18.039	17.9783	18.237	19.3177	20.4273	19.8621	20.0559	19.2065	+	LFQ intensity LSD1_LFQ intensity NLS	3	3	3	15.2	15.2	15.2	26.244	0.00053008	3.0753	30900000	7	1.99529	0.014771	1.49494	0.621797	Q9NQZ6	Q9NQZ6	Zinc finger C4H2 domain-containing protein	ZC4H2	3992
21.4375	21.3045	21.5356	21.0821	22.6497	22.7056	22.391	22.9672	+	LFQ intensity LSD1_LFQ intensity NLS	11	11	11	41.8	41.8	41.8	40.259	0	46.305	529000000	73	3.89878	0.0147606	1.33842	0.62148	Q15545;A0A096LPC3	Q15545	Transcription initiation factor TFIID subunit 7	TAF7	2699
20.7223	20.3101	20.4676	20.4972	21.5451	21.9916	21.714	22.0886	+	LFQ intensity LSD1_LFQ intensity NLS	10	10	10	25.3	25.3	25.3	83.642	0	51.299	198000000	61	3.93292	0.0146959	1.33552	0.620847	Q9BXB4;H7C487;Q9BXB5	Q9BXB4	Oxysterol-binding protein-related protein 11	OSBPL11	3761
23.6209	23.3239	22.9619	23.0625	24.7077	24.6649	24.4551	24.4984	+	LFQ intensity LSD1_LFQ intensity NLS	36	36	36	42.7	42.7	42.7	116.92	0	323.31	1900000000	389	3.80296	0.0147347	1.33924	0.620056	O15294;C9JZL3	O15294	UDP-N-acetylglucosamine--peptide N-acetylglucosaminyltransferase 110 kDa subunit	OGT	1362
25.0233	25.4707	25.2714	25.0854	26.604	26.5624	26.4908	26.3745	+	LFQ intensity LSD1_LFQ intensity NLS	77	77	77	42.5	42.5	42.5	251.11	0	323.31	8340000000	950	4.58391	0.015043	1.29521	0.613061	Q5VUA4;U3KQ37	Q5VUA4	Zinc finger protein 318	ZNF318	2898
18.265	18.3136	18.2547	18.9662	19.5878	20.3538	19.2489	20.2877	+	LFQ intensity LSD1_LFQ intensity NLS	4	4	4	4.3	4.3	4.3	210.29	0	6.4829	64700000	16	2.3551	0.0150743	1.41969	0.611844	Q8NDV7;H7C269;H3BTQ1	Q8NDV7;H7C269;H3BTQ1	Trinucleotide repeat-containing gene 6A protein	TNRC6A	3273
19.0769	19.5878	18.9937	18.9714	20.5261	21.0088	20.4375	20.1206	+	LFQ intensity LSD1_LFQ intensity NLS	11	11	11	10.1	10.1	10.1	217.33	0	32.867	108000000	46	2.95071	0.0150313	1.36578	0.611298	Q5T5U3;A0A087WW76;E7ESW5;F8W9U9	Q5T5U3;A0A087WW76;E7ESW5;F8W9U9	Rho GTPase-activating protein 21	ARHGAP21	2865
21.3962	20.7307	21.0756	20.8346	22.4676	22.8365	21.9777	22.2006	+	LFQ intensity LSD1_LFQ intensity NLS	13	13	13	28.4	28.4	28.4	72.757	0	48.578	417000000	53	2.9202	0.0154618	1.36134	0.60865	O95905;C9J316;F2Z2R1;C9JGV1	O95905;C9J316	Protein SGT1	ECD	1608
20.3752	20.3101	20.7634	20.4874	22.0821	21.5356	21.823	21.7265	+	LFQ intensity LSD1_LFQ intensity NLS	7	7	1	18.8	18.8	2.5	48.099	0	53.718	260000000	49	3.87623	0.0154915	1.30779	0.607859	B4DLN1;P52815	B4DLN1			439
21.1519	20.5261	21.0156	20.7389	22.2214	22.1612	21.8651	22.502	+	LFQ intensity LSD1_LFQ intensity NLS	11	11	11	14.3	14.3	14.3	106.37	0	135.3	287000000	93	3.35293	0.0156011	1.32929	0.606556	P57740;H0YG15;G3V1T4	P57740	Nuclear pore complex protein Nup107	NUP107	2248
18.8779	19.9601	19.4108	19.7106	21.0886	20.9672	20.6096	20.7634	+	LFQ intensity LSD1_LFQ intensity NLS	12	12	12	14.2	14.2	14.2	168.16	0	49.09	112000000	42	2.75475	0.0156084	1.36736	0.606102	A0A0D9SGJ6;J3KQV8;O43426;J3KPK1;C9JFZ1;C9JW66;H7BZ56;C9J1Z6;H7BZC2	A0A0D9SGJ6;J3KQV8;O43426;J3KPK1;C9JFZ1;C9JW66	Synaptojanin-1	SYNJ1	333
17.9065	17.8539	19.1385	18.6719	19.3299	19.7455	19.3277	21.4425	+	LFQ intensity LSD1_LFQ intensity NLS	9	9	9	11.7	11.7	11.7	128.48	0	80.996	59700000	11	1.42056	0.0156106	1.56873	0.605285	E9PDF6;O43795;H7C2Y7;C9JYW1;E7EQD9;Q9UBC5;C9JUP5;G3V342	E9PDF6;O43795;H7C2Y7	Unconventional myosin-Ib	MYO1B	734
17.7218	18.1176	18.2687	19.7493	20.002	19.83	19.8361	20.0821	+	LFQ intensity LSD1_LFQ intensity NLS	5	5	5	9.3	9.3	9.3	109.65	0	8.9714	40800000	6	1.77889	0.0159006	1.4732	0.60181	H0YAN8;O15013;E9PB39	H0YAN8;O15013	Rho guanine nucleotide exchange factor 10	ARHGEF10	1017
17.7405	18.356	18.3876	18.6307	18.963	19.5582	20.5915	19.7455	+	LFQ intensity LSD1_LFQ intensity NLS	11	11	11	8.6	8.6	8.6	195.91	0	32.865	77800000	19	2.00494	0.0158786	1.43584	0.601706	Q8IWJ2;B8ZZW2;A0A087WZR8;B8ZZA5;H7BYJ9	Q8IWJ2;B8ZZW2	GRIP and coiled-coil domain-containing protein 2	GCC2	3159
22.9316	23.178	22.3962	22.5638	24.1871	24.239	23.867	24.0443	+	LFQ intensity LSD1_LFQ intensity NLS	25	25	25	39.5	39.5	39.5	75.718	0	167.35	1030000000	199	3.28457	0.0159067	1.31694	0.59987	Q9H6T3	Q9H6T3	RNA polymerase II-associated protein 3	RPAP3	3896
20.2419	20.3211	20.1581	19.853	21.6453	21.1642	21.4066	21.502	+	LFQ intensity LSD1_LFQ intensity NLS	7	7	7	22.7	22.7	22.7	48.939	0	51.725	278000000	66	3.96017	0.0158849	1.28601	0.599843	E9PL17;Q92989;E9PJM4;E9PKV5	E9PL17;Q92989	Polyribonucleotide 5-hydroxyl-kinase Clp1	CLP1	775
28.4707	28.0914	28.0453	28.1361	29.3992	29.4394	29.3367	29.6424	+	LFQ intensity LSD1_LFQ intensity NLS	120	120	120	59.6	59.6	59.6	273.42	0	323.31	50600000000	2319	4.43444	0.0159891	1.2685	0.599149	P49327;J3KTF0	P49327	Fatty acid synthase;[Acyl-carrier-protein] S-acetyltransferase;[Acyl-carrier-protein] S-malonyltransferase;3-oxoacyl-[acyl-carrier-protein] synthase;3-oxoacyl-[acyl-carrier-protein] reductase;3-hydroxyacyl-[acyl-carrier-protein] dehydratase;Enoyl-[acyl-carrier-protein] reductase;Oleoyl-[acyl-carrier-protein] hydrolase	FASN	2107
19.2855	19.6293	19.6558	18.1242	20.5545	20.6714	20.6886	20.4375	+	LFQ intensity LSD1_LFQ intensity NLS	7	7	7	14	14	14	83.023	0	17.963	107000000	23	2.08747	0.0161143	1.4143	0.598125	Q8TBA6;H0YK03	Q8TBA6	Golgin subfamily A member 5	GOLGA5	3312
18.6943	18.9279	18.6464	18.182	20.68	20.654	19.7439	19.113	+	LFQ intensity LSD1_LFQ intensity NLS	5	5	5	10.1	10.1	10.1	96.263	0	15.319	36000000	9	1.88789	0.0168835	1.43507	0.595242	Q8N0Z3	Q8N0Z3	Spindle and centriole-associated protein 1	SPICE1	3200	+
20.3101	20.2302	20.002	20.5356	22.1519	21.8307	21.6096	20.9098	+	LFQ intensity LSD1_LFQ intensity NLS	9	9	9	27	27	27	55.846	0	20.013	165000000	41	2.50119	0.0168378	1.35604	0.59335	Q13325	Q13325	Interferon-induced protein with tetratricopeptide repeats 5	IFIT5	2536
17.0587	19.0129	18.4639	17.9472	19.3559	19.6505	19.7876	19.4252	+	LFQ intensity LSD1_LFQ intensity NLS	5	5	5	9.5	9.5	9.5	88.318	0	7.9282	89000000	8	1.81516	0.0170094	1.43413	0.590826	Q96N46;F8WDA3;C9JCY7;C9J974;F8WDH5	Q96N46	Tetratricopeptide repeat protein 14	TTC14	3586
20.8423	19.7553	17.7846	18.0124	20.3538	20.8423	20.6006	21.0359	+	LFQ intensity LSD1_LFQ intensity NLS	16	16	16	26.9	26.9	26.9	93.532	0	112.82	427000000	34	1.13246	0.0171915	1.60948	0.586568	Q8TD16	Q8TD16	Protein bicaudal D homolog 2	BICD2	3323
17.8566	19.6731	19.006	20.0559	20.4375	20.8034	20.7389	20.4375	+	LFQ intensity LSD1_LFQ intensity NLS	5	5	5	29	29	29	31.263	0	11.377	115000000	27	1.59826	0.0173775	1.45639	0.584494	B5MCT7;P49593;A8MX49;C9J2F3	B5MCT7;P49593	Protein phosphatase 1F	PPM1F	463
23.4425	23.3511	23.1596	23.5754	24.6431	24.604	24.7945	24.4298	+	LFQ intensity LSD1_LFQ intensity NLS	29	29	29	51.2	51.2	51.2	78.576	0	323.31	2020000000	422	4.41433	0.0173545	1.23568	0.584227	Q6NZY4;F5GXQ6;F5H6J5;F5GX80;F5H803;F5GYI9	Q6NZY4	Zinc finger CCHC domain-containing protein 8	ZCCHC8	2966
17.9967	18.9969	17.9317	18.1297	18.5849	19.7488	20.2066	20.265	+	LFQ intensity LSD1_LFQ intensity NLS	5	5	5	11.4	11.4	11.4	71.106	0	10.153	23600000	4	1.68269	0.0174003	1.43757	0.583959	Q9BQI3;H7C033	Q9BQI3	Eukaryotic translation initiation factor 2-alpha kinase 1	EIF2AK1	3682
17.3601	17.6702	18.0217	18.9542	19.3387	19.3452	19.5489	19.2581	+	LFQ intensity LSD1_LFQ intensity NLS	4	4	4	1.7	1.7	1.7	505.64	0	5.5645	39700000	10	2.10298	0.0173773	1.37112	0.583299	H0Y390;H3BPE1;H3BQK9;Q9UPN3;E9PNZ4;H0Y6T5;H0Y4F5;H0Y314;E9PLY5	H0Y390;H3BPE1;H3BQK9;Q9UPN3;E9PNZ4	Microtubule-actin cross-linking factor 1, isoforms 1/2/3/5	MACF1	990
24.6096	24.5638	24.2244	24.317	25.5841	25.7821	25.4769	25.8264	+	LFQ intensity LSD1_LFQ intensity NLS	49	49	7	46.5	46.5	5.4	175.29	0	323.31	3230000000	541	4.21861	0.0174651	1.23865	0.58295	Q5SW79;E5RJT5;E5RFU8;E5RIH6	Q5SW79	Centrosomal protein of 170 kDa	CEP170	2848
22.6649	22.4375	22.7471	23.0241	23.9225	24.1095	23.8764	23.9225	+	LFQ intensity LSD1_LFQ intensity NLS	18	18	18	52.6	52.6	52.6	46.44	0	86.013	959000000	172	4.08678	0.0175538	1.23933	0.581376	P50454;E9PPV6;E9PR70;E9PKH2;E9PK86;E9PMI5;E9PNX1;E9PJH8;E9PIG2;E9PRS3;E9PQ34;H0YEP8;E9PLA6	P50454;E9PPV6;E9PR70;E9PKH2	Serpin H1	SERPINH1	2136
23.1127	22.4093	23.0173	22.8014	24.3511	24.2021	23.9043	23.9672	+	LFQ intensity LSD1_LFQ intensity NLS	16	16	10	42.7	42.7	28.4	64.436	0	284.4	1120000000	173	3.29728	0.0176042	1.27099	0.581016	Q9H0L4	Q9H0L4	Cleavage stimulation factor subunit 2 tau variant	CSTF2T	3829
19.7022	19.6505	19.8408	17.9574	20.7056	20.5451	20.714	20.8802	+	LFQ intensity LSD1_LFQ intensity NLS	11	11	11	19	19	19	106.35	0	21.833	145000000	47	1.70849	0.0175812	1.42348	0.580898	Q8TE76	Q8TE76	MORC family CW-type zinc finger protein 4	MORC4	3332
20.9316	20.3321	17.3901	20.6971	21.1079	21.1642	21.4015	22.3565	+	LFQ intensity LSD1_LFQ intensity NLS	8	8	8	6.9	6.9	6.9	193.1	0	50.326	124000000	16	0.979495	0.0175582	1.6698	0.580874	Q9H792;H0YN99;H3BUZ5	Q9H792;H0YN99	Pseudopodium-enriched atypical kinase 1	PEAK1	3900
24.3101	24.918	25.0935	24.8093	25.8576	25.767	26.1927	26.5165	+	LFQ intensity LSD1_LFQ intensity NLS	29	29	29	46.7	46.7	46.7	81.307	0	209.42	4510000000	474	2.78951	0.0175352	1.30075	0.580761	P33993;C9J8M6	P33993	DNA replication licensing factor MCM7	MCM7	1963
22.8307	22.2244	22.9024	22.7553	24.1015	23.9847	23.8481	23.7995	+	LFQ intensity LSD1_LFQ intensity NLS	29	29	29	37.5	37.5	37.5	103.08	0	187.72	960000000	259	3.51754	0.0179896	1.25521	0.578782	Q9H3U1	Q9H3U1	Protein unc-45 homolog A	UNC45A	3865
19.8113	20.0691	20.0691	18.5759	20.4576	21.2361	20.7955	21.68	+	LFQ intensity LSD1_LFQ intensity NLS	9	9	9	12.7	12.7	12.7	158.3	0	22.836	117000000	20	1.71433	0.0183109	1.41099	0.577086	Q96RT1	Q96RT1	Protein LAP2	ERBB2IP	3614
20.0821	20.343	19.0373	19.5823	21.0951	20.8876	20.7056	21.8538	+	LFQ intensity LSD1_LFQ intensity NLS	12	12	12	37.7	37.7	37.7	51.495	0	35.96	238000000	40	1.93768	0.0185718	1.37433	0.576693	A0A024R0Y4;O75478;A0A087WWR4;A0A087WTV5;A0A087WU71;A0A087WZS1;A0A087WYK3	A0A024R0Y4;O75478;A0A087WWR4;A0A087WTV5	Transcriptional adapter 2-alpha	TADA2L;TADA2A	1
22.5592	22.3511	21.9985	22.0088	23.3778	23.5404	23.4041	23.5404	+	LFQ intensity LSD1_LFQ intensity NLS	29	29	29	28	28	28	177.97	0	94.508	811000000	157	3.86555	0.0185478	1.23626	0.576661	Q5T5Y3	Q5T5Y3	Calmodulin-regulated spectrin-associated protein 1	CAMSAP1	2867
18.1744	18.3699	19.4098	17.9612	20.2066	20.5823	20.4874	18.5662	+	LFQ intensity LSD1_LFQ intensity NLS	8	7	7	12.7	11.9	11.9	93.696	0	15.351	77500000	9	1.38881	0.0185239	1.48179	0.576421	Q9UJA3	Q9UJA3	DNA helicase MCM8	MCM8	4202
23.2492	22.8614	22.5731	22.5938	24.1332	24.1332	24.002	23.9847	+	LFQ intensity LSD1_LFQ intensity NLS	34	34	34	52.9	52.9	52.9	94.474	0	318.92	1620000000	363	3.58233	0.0187439	1.24391	0.575159	Q5T5X7	Q5T5X7	BEN domain-containing protein 3	BEND3	2866
21.8269	21.5309	21.502	21.6276	23.0559	22.7553	22.6231	22.9189	+	LFQ intensity LSD1_LFQ intensity NLS	19	19	19	39.1	39.1	39.1	78.763	0	56.903	573000000	77	4.2786	0.018735	1.21646	0.573904	P10244	P10244	Myb-related protein B	MYBL2	1718
25.1055	24.7129	25.4831	24.9628	26.4598	26.5285	25.8264	26.5898	+	LFQ intensity LSD1_LFQ intensity NLS	16	16	16	71.3	71.3	71.3	29.506	0	207.41	4160000000	263	2.76778	0.018711	1.28505	0.573896	P61289;K9J957;K7ENH2;A0A087WTV2;K7ESG5;B3KQ25;B7Z8D3;K7EPX6;K7EKR3;K7EMD0;K7EJF8	P61289;K9J957;K7ENH2;A0A087WTV2;K7ESG5;B3KQ25	Proteasome activator complex subunit 3	PSME3	2285
17.8942	17.5084	18.5489	19.0348	19.2512	19.6697	19.7157	19.7586	+	LFQ intensity LSD1_LFQ intensity NLS	5	5	5	7.3	7.3	7.3	153.1	0	10.538	49400000	7	2.03011	0.0187586	1.35216	0.573188	Q99570;D6RJ98	Q99570	Phosphoinositide 3-kinase regulatory subunit 4	PIK3R4	3649
19.7683	20.6971	21.2877	21.3538	21.8689	21.8913	22.1174	22.7856	+	LFQ intensity LSD1_LFQ intensity NLS	12	12	12	36.1	36.1	36.1	49.184	0	91.725	247000000	74	1.76791	0.0187347	1.38908	0.572822	P62191;G3V4X1	P62191	26S protease regulatory subunit 4	PSMC1	2302	+
17.6938	18.1929	17.4685	19.0606	19.9459	19.5069	19.7939	18.7511	+	LFQ intensity LSD1_LFQ intensity NLS	3	3	3	6.4	6.4	6.4	105.02	0	4.5317	35000000	10	1.70814	0.0190953	1.39551	0.57153	Q8TEV9	Q8TEV9	Smith-Magenis syndrome chromosomal region candidate gene 8 protein	SMCR8	3339
20.1703	21.4425	20.5451	20.6627	21.8385	21.8987	22.2535	22.0359	+	LFQ intensity LSD1_LFQ intensity NLS	19	18	1	18.7	18.1	1.1	150.6	0	44.091	292000000	71	2.4346	0.0193924	1.30147	0.570149	A0A075B6Q3;H7C4B2	A0A075B6Q3;H7C4B2		BCORL1	11
20.6364	20.8499	20.4874	20.9601	21.5685	21.6364	22.2961	22.6209	+	LFQ intensity LSD1_LFQ intensity NLS	10	10	10	37.9	37.9	37.9	51.169	0	47.832	262000000	43	2.46778	0.0194747	1.297	0.569535	P23258;Q9NRH3;K7EIS0;K7EKE5	P23258;Q9NRH3;K7EIS0;K7EKE5	Tubulin gamma-1 chain;Tubulin gamma-2 chain;Tubulin gamma chain	TUBG1;TUBG2	1860
20.9951	20.9024	21.0625	21.2477	21.9424	22.0886	22.5915	22.5451	+	LFQ intensity LSD1_LFQ intensity NLS	17	17	17	35.7	35.7	35.7	70.182	0	163.84	457000000	100	3.35801	0.0194502	1.23996	0.569239	Q9UBU9;E9PIN3;B4E227;E9PQA4;E9PLA7;H0YDU0	Q9UBU9;E9PIN3	Nuclear RNA export factor 1	NXF1	4163
22.0493	21.3699	21.9847	22.1111	23.0002	22.9243	23.0789	23.5404	+	LFQ intensity LSD1_LFQ intensity NLS	20	20	20	30.4	30.4	30.4	107.89	0	157.05	613000000	147	2.9006	0.0196205	1.25724	0.566204	O60763;REV__R4GMN2;REV__Q5VZ89;REV__R4GNB2;REV__R4GN35	O60763	General vesicular transport factor p115	USO1	1450
17.4144	19.0373	18.0788	19.103	19.8891	19.7439	19.4835	19.9882	+	LFQ intensity LSD1_LFQ intensity NLS	33	1	1	56.1	3.1	3.1	69.889	0	4.0712	63300000	29	1.7605	0.0196459	1.36778	0.565147	Q4VB86	Q4VB86		EPB41	2788
18.4347	19.6168	19.209	18.5644	20.1703	20.4273	19.9882	20.4273	+	LFQ intensity LSD1_LFQ intensity NLS	5	5	3	15.8	15.8	8.3	47.256	0	10.524	83800000	23	2.31989	0.0197662	1.29704	0.564493	A0A087X0G7;A0A087WUW6;A0A087X1B1;Q9Y6K9;A0A087WV30;C9JN51;C9JH59	A0A087X0G7;A0A087WUW6;A0A087X1B1;Q9Y6K9;A0A087WV30;C9JN51	NF-kappa-B essential modulator	IKBKG	55
20.5638	20.4273	20.3962	20.7471	21.4923	21.6051	22.0258	21.8499	+	LFQ intensity LSD1_LFQ intensity NLS	20	20	20	6.4	6.4	6.4	573.83	0	43.603	288000000	52	3.80408	0.0197416	1.20967	0.564125	Q5T4S7;A0A0A0MSW0;X6R960;X6RE05	Q5T4S7	E3 ubiquitin-protein ligase UBR4	UBR4	2863
19.4576	19.3101	19.1457	19.0158	20.417	20.2989	20.3857	20.5823	+	LFQ intensity LSD1_LFQ intensity NLS	11	11	11	8.1	8.1	8.1	243.08	0	44.071	98900000	47	4.36152	0.019861	1.18871	0.562552	Q93074;Q7Z3Z5;H7C191	Q93074;Q7Z3Z5	Mediator of RNA polymerase II transcription subunit 12	MED12;TNRC11	3446
18.5657	19.8965	19.1137	18.2274	19.2604	20.6096	20.9459	20.6627	+	LFQ intensity LSD1_LFQ intensity NLS	13	13	13	9.4	9.4	9.4	247.89	0	69.238	121000000	40	1.45243	0.019763	1.41884	0.562074	Q9Y2F5;A0A096LPH9	Q9Y2F5	Little elongation complex subunit 1	ICE1	4298
26.5492	27.1507	25.9912	26.726	27.6998	28.1652	27.9372	27.673	+	LFQ intensity LSD1_LFQ intensity NLS	25	5	5	72.8	16.9	16.9	47.766	0	179.73	11800000000	207	2.49882	0.0205532	1.26451	0.557932	Q5JP53;P07437;Q5ST81;G3V2A3	Q5JP53;P07437;Q5ST81	Tubulin beta chain	TUBB	1683
27.726	27.4938	27.0914	27.1604	28.7129	28.632	28.5682	28.3869	+	LFQ intensity LSD1_LFQ intensity NLS	103	103	82	56.9	56.9	47.6	217.1	0	323.31	31300000000	1675	3.49746	0.0205281	1.2071	0.557907	F5GWX5;A0A0C4DGG9;Q14839;F5H6N4;F6T542	F5GWX5;A0A0C4DGG9;Q14839	Chromodomain-helicase-DNA-binding protein 4	CHD4	297	+
19.606	20.7389	19.786	21.0821	20.895	21.6584	21.8385	22.3101	+	LFQ intensity LSD1_LFQ intensity NLS	17	17	17	21.1	21.1	21.1	136.45	0	96.511	249000000	65	1.59401	0.0204818	1.37223	0.556806	O60315;E7EUW9;U3KQ51;E7ESP8;U3KPV5;H7C0G0	O60315;E7EUW9	Zinc finger E-box-binding homeobox 2	ZEB2	1432
19.6382	20.0821	19.3924	20.2066	20.7634	21.1457	21.2877	21.0625	+	LFQ intensity LSD1_LFQ intensity NLS	10	10	10	16.2	16.2	16.2	120.85	0	26.409	102000000	20	2.86551	0.0205249	1.235	0.556313	P28749;H0YE05;E9PNB6	P28749	Retinoblastoma-like protein 1	RBL1	1913
18.5722	17.8127	18.1686	18.6108	19.7891	19.4313	19.2673	19.6114	+	LFQ intensity LSD1_LFQ intensity NLS	2	2	2	7.7	7.7	7.7	70.075	0	5.5653	36400000	3	2.86938	0.0206456	1.23374	0.555895	X6REB3;P15923;K7ENI0;K7ELF3;K7ENH8;A0A0A0MRB7	X6REB3;P15923;K7ENI0;K7ELF3;K7ENH8;A0A0A0MRB7	Transcription factor E2-alpha	TCF3	1784	+
17.5616	18.9291	23.9043	17.1264	23.2535	22.3538	17.422	23.6431	+	LFQ intensity LSD1_LFQ intensity NLS	4	4	4	4.4	4.4	4.4	123.58	0.00052701	2.976	992000000	11	0.49194	0.020682	2.28773	0.555172	Q8NHU6	Q8NHU6	Tudor domain-containing protein 7	TDRD7	3297
23.6431	23.391	22.8461	22.9334	24.4984	24.6811	24.239	24.3101	+	LFQ intensity LSD1_LFQ intensity NLS	46	46	29	27.1	27.1	20.6	274.25	0	323.31	1750000000	361	2.91996	0.020657	1.22875	0.555085	O75179;H0YM23;H0YLQ3	O75179;H0YM23	Ankyrin repeat domain-containing protein 17	ANKRD17	1477
19.9882	20.6971	21.5261	20.1457	22.1825	21.8073	22.2678	21.417	+	LFQ intensity LSD1_LFQ intensity NLS	10	10	10	13.4	13.4	13.4	109.96	0	54.862	234000000	47	1.80564	0.0208771	1.32942	0.554332	O43592;F8WDU6;F5GYW6;F5GZM3	O43592	Exportin-T	XPOT	1400
23.5165	23.4425	23.1991	23.4425	24.5869	24.8044	24.5165	24.3712	+	LFQ intensity LSD1_LFQ intensity NLS	45	45	44	28	28	27.6	270.63	0	323.31	1460000000	304	4.30696	0.0212596	1.16959	0.553332	P46821;D6RA32;D6RA40;D6RCL2;D6RGJ3	P46821	Microtubule-associated protein 1B;MAP1B heavy chain;MAP1 light chain LC1	MAP1B	2078
19.2255	19.8757	21.1519	20.7553	20.6971	21.5498	22.5475	21.9024	+	LFQ intensity LSD1_LFQ intensity NLS	13	13	13	10.6	10.6	10.6	205.11	0	48.99	209000000	55	1.3028	0.0213796	1.42209	0.551099	Q8TEM1	Q8TEM1	Nuclear pore membrane glycoprotein 210	NUP210	3337
19.5676	17.414	19.7257	18.9964	20.0951	20.5451	20.0292	20.6364	+	LFQ intensity LSD1_LFQ intensity NLS	11	11	11	10.8	10.8	10.8	178.97	0	18.504	74700000	28	1.35992	0.0216516	1.40053	0.549259	Q9H3S7	Q9H3S7	Tyrosine-protein phosphatase non-receptor type 23	PTPN23	3864
21.6006	20.8346	20.7307	21.2185	22.1079	22.3239	22.3592	22.4501	+	LFQ intensity LSD1_LFQ intensity NLS	14	14	14	25	25	25	79.49	0	41.114	356000000	77	2.92043	0.0216257	1.21419	0.549145	Q8TC07;C9JA93;F8VV61;F8WCB5;F8WDJ1;F8WF35	Q8TC07;C9JA93	TBC1 domain family member 15	TBC1D15	3317
22.6006	22.5545	22.0258	22.2125	23.5869	23.4298	23.5522	23.5285	+	LFQ intensity LSD1_LFQ intensity NLS	22	22	22	38.5	38.5	38.5	97.071	0	301.47	884000000	162	3.77369	0.0216	1.17599	0.548995	P33981;D6RF82;D6REX1;D6RIC6;D6RFY1	P33981	Dual specificity protein kinase TTK	TTK	1960
17.7847	20.1457	20.1457	20.0691	20.714	20.7389	20.9951	21.417	+	LFQ intensity LSD1_LFQ intensity NLS	8	7	2	34.3	30.3	7.6	39.393	0	21.952	90500000	15	1.24828	0.0216885	1.42995	0.548612	Q14558;C9JNQ3	Q14558	Phosphoribosyl pyrophosphate synthase-associated protein 1	PRPSAP1	2615
24.8385	24.6971	24.6431	24.9225	25.9562	25.9157	26.1661	25.6784	+	LFQ intensity LSD1_LFQ intensity NLS	66	66	66	44.2	44.2	44.2	236.02	0	323.31	4280000000	726	4.16609	0.0220993	1.15382	0.544576	F8VPD4;P27708;H7C2E4;H7BZB3;H7C3Z5;P31327	F8VPD4;P27708	CAD protein;Glutamine-dependent carbamoyl-phosphate synthase;Aspartate carbamoyltransferase;Dihydroorotase	CAD	884
20.7715	20.1206	20.417	20.1946	21.343	21.5261	21.8987	21.4972	+	LFQ intensity LSD1_LFQ intensity NLS	9	9	9	21.7	21.7	21.7	73.48	0	51.838	164000000	21	3.14201	0.0223377	1.19032	0.544083	Q9P0U3;F8VRZ8	Q9P0U3	Sentrin-specific protease 1	SENP1	4120
19.9601	20.5915	20.4775	18.3188	20.9171	20.8499	21.5869	21.5545	+	LFQ intensity LSD1_LFQ intensity NLS	9	9	9	12.2	12.2	12.2	118.82	0	29.618	225000000	45	1.31968	0.0223925	1.39012	0.542835	I3L2C7;P57678;I3L399;I3L4M4;I3L4A4;E7EN12;I3L1J7	I3L2C7;P57678	Gem-associated protein 4	GEMIN4	1144
21.8651	21.7836	22.8365	22.9725	22.8839	23.4676	23.8764	24.6096	+	LFQ intensity LSD1_LFQ intensity NLS	21	21	20	40.4	40.4	38.2	66.408	0	127.24	653000000	118	1.50962	0.0224319	1.34497	0.542466	P20700;E9PBF6;A0A0D9SFE5;A0A0D9SFY5	P20700;E9PBF6;A0A0D9SFE5	Lamin-B1	LMNB1	1837
18.4176	20.2535	20.9388	20.5451	20.8191	20.1946	22.6649	22.6475	+	LFQ intensity LSD1_LFQ intensity NLS	3	3	3	27.5	27.5	27.5	17.643	0	6.1851	264000000	21	0.930138	0.0224056	1.54278	0.542398	A0A0A0MRJ2;Q5VTZ4;P18847	A0A0A0MRJ2;Q5VTZ4;P18847	Cyclic AMP-dependent transcription factor ATF-3	ATF3	201
22.2125	22.2506	21.9316	22.0559	22.8249	23.2821	23.5165	23.5522	+	LFQ intensity LSD1_LFQ intensity NLS	26	26	26	36.3	36.3	36.3	121.72	0	116.02	954000000	176	3.1852	0.0223842	1.18127	0.541152	Q9NNW5;A0A087X295;E9PDU5;E9PBK6;Q6PKC6;C9K020;V9GYU1;E5RFX3;F8WE36;C9JFP6	Q9NNW5;A0A087X295;E9PDU5;E9PBK6	WD repeat-containing protein 6	WDR6	3966
18.5287	18.0109	18.0421	19.2219	19.6488	19.9601	19.2349	19.9742	+	LFQ intensity LSD1_LFQ intensity NLS	3	3	3	1.6	1.6	1.6	422.39	0	8.9408	46800000	11	2.03487	0.0227082	1.2536	0.537558	Q709C8	Q709C8	Vacuolar protein sorting-associated protein 13C	VPS13C	3028
18.0072	17.1058	19.174	22.3211	21.1143	21.0493	20.4375	20.7553	+	LFQ intensity LSD1_LFQ intensity NLS	6	6	3	16.5	16.5	9.2	62.495	0	10.557	184000000	20	0.716116	0.0231504	1.68704	0.535817	O60907;Q9BQ87;C9JP56;A0A0D9SFI2;C9J5F9	O60907	F-box-like/WD repeat-containing protein TBL1X	TBL1X	1460
27.9146	27.5682	27.9869	27.9595	28.9896	29.019	28.7833	29.2007	+	LFQ intensity LSD1_LFQ intensity NLS	43	43	43	78.6	78.6	78.6	59.62	0	323.31	74400000000	1270	3.92228	0.0231927	1.14088	0.535708	P50990;H7C4C8;H7C2U0	P50990	T-complex protein 1 subunit theta	CCT8	2147
24.7492	25.3376	25.0105	25.2571	26.3494	26.1546	26.3307	26.1115	+	LFQ intensity LSD1_LFQ intensity NLS	27	8	1	76.9	27.6	2.7	49.953	0	122.93	5200000000	220	3.6506	0.0233959	1.14797	0.534945	Q9BVA1	Q9BVA1	Tubulin beta-2B chain	TUBB2B	3734
20.9672	20.7389	20.0951	20.6886	21.928	21.9098	21.5309	21.8385	+	LFQ intensity LSD1_LFQ intensity NLS	9	9	9	23.1	23.1	23.1	64.232	0	63.616	251000000	87	2.89183	0.0233836	1.17932	0.534208	F5GZ78;P49023;F5H836;H0YIE4	F5GZ78;P49023	Paxillin	PXN	836
23.9225	23.3239	23.4551	22.7512	24.8717	24.6865	24.3844	24.3578	+	LFQ intensity LSD1_LFQ intensity NLS	57	43	34	38.8	32.7	25.9	226.59	0	275.35	2380000000	382	2.37384	0.0235763	1.21192	0.53365	Q12873;H7C3H7;H7C2H0;K7EPV1;I3L1I4	Q12873	Chromodomain-helicase-DNA-binding protein 3	CHD3	2491	+
21.7223	20.9742	20.8876	20.8269	22.8269	22.5615	22.7735	21.3645	+	LFQ intensity LSD1_LFQ intensity NLS	16	16	16	26.5	26.5	26.5	90.359	0	65.133	361000000	108	1.71918	0.0240637	1.27885	0.532359	Q9Y6A5;E7EMT0;C9JA91;Q8IX09;C9JWI7;H0Y8F2;F8WC55	Q9Y6A5	Transforming acidic coiled-coil-containing protein 3	TACC3	4387
21.6928	21.1395	20.8651	21.1457	22.44	22.1395	22.2506	22.7286	+	LFQ intensity LSD1_LFQ intensity NLS	12	12	12	37.2	37.2	37.2	39.933	0	55.797	365000000	85	2.80119	0.0240544	1.17887	0.531953	Q96A49	Q96A49	Synapse-associated protein 1	SYAP1	3462
23.9406	23.7695	23.7995	24.1174	25.0691	25.1449	25.1984	24.7441	+	LFQ intensity LSD1_LFQ intensity NLS	76	71	69	42.4	40.9	39.6	278.16	0	322.83	2300000000	559	3.91245	0.0240272	1.13236	0.531819	O75369;E7EN95;A0A0A0MT44;H7C5L4;A0A0C4DGA1	O75369;E7EN95	Filamin-B	FLNB	1486
20.3101	20.2877	20.5638	20.6627	21.8876	21.417	21.7995	21.3266	+	LFQ intensity LSD1_LFQ intensity NLS	12	12	12	9.3	9.3	9.3	196.04	0	89.041	210000000	59	3.33848	0.0239729	1.15158	0.53143	Q5SRE5;H7C4K7	Q5SRE5	Nucleoporin NUP188 homolog	NUP188	2845
21.0292	21.1143	21.5685	21.7348	22.4576	22.2273	22.6431	22.823	+	LFQ intensity LSD1_LFQ intensity NLS	20	20	19	28	28	27	118.08	0	86.02	495000000	117	2.81895	0.0241354	1.17606	0.53122	Q4VCS5;E7ERM3;A6NP16	Q4VCS5;E7ERM3;A6NP16	Angiomotin	AMOT	2791
18.0354	13.3443	16.786	17.417	18.7919	16.9202	18.4475	18.0596	+	LFQ intensity LSD1_LFQ intensity NLS	29	29	29	46.5	46.5	46.5	58.044	0	323.31	43600000000	424	0.719827	0.0242027	1.65912	0.530966	Q15696;Q15695;A6NDW0	Q15696	U2 small nuclear ribonucleoprotein auxiliary factor 35 kDa subunit-related protein 2	ZRSR2	2714
20.6006	20.0821	19.8803	17.643	20.9098	21.1581	21.0691	20.714	+	LFQ intensity LSD1_LFQ intensity NLS	8	8	8	16.4	16.4	16.4	88.206	0	17.749	92100000	14	1.11486	0.0243236	1.41123	0.53029	O94782;C9JC88;C9JWX4	O94782	Ubiquitin carboxyl-terminal hydrolase 1	USP1	1541
19.2696	19.2779	20.5915	17.3446	20.9459	20.8269	20.1457	20.2764	+	LFQ intensity LSD1_LFQ intensity NLS	5	4	4	18	15.3	15.3	49.301	0	12.978	108000000	15	1.0627	0.0244126	1.42785	0.529341	O75351	O75351	Vacuolar protein sorting-associated protein 4B	VPS4B	1482
21.5117	21.2535	21.1457	21.3266	22.4775	22.3538	22.1916	22.7348	+	LFQ intensity LSD1_LFQ intensity NLS	35	18	16	18.5	11.8	10.3	269.45	0	159.29	417000000	113	3.74742	0.0245778	1.13005	0.528549	Q8IWZ3;E9PDP5;H7C2F5;H3BLS9;D6RHC4;H0Y4P6;A0A0A0MQZ8;H0Y7Y3;H0Y785;H0Y472;H7C2E1	Q8IWZ3;E9PDP5	Ankyrin repeat and KH domain-containing protein 1	ANKHD1	3165
21.4874	21.2185	20.9951	21.0886	22.7389	22.6253	22.0493	22.0359	+	LFQ intensity LSD1_LFQ intensity NLS	13	12	2	25.5	24.2	3.2	105.31	0	42.394	376000000	87	2.79013	0.0249732	1.16498	0.526034	Q9Y467	Q9Y467	Sal-like protein 2	SALL2	4339
22.2302	22.2905	22.5045	22.2764	23.7286	23.3239	23.2961	23.4041	+	LFQ intensity LSD1_LFQ intensity NLS	16	16	16	33.5	33.5	33.5	83.541	0	146.83	788000000	150	4.11925	0.0249454	1.11276	0.525703	Q99567;J3KMX1;I3L245;I3L4K7;I3L2W3	Q99567;J3KMX1	Nuclear pore complex protein Nup88	NUP88	3648
23.7695	23.7796	22.7776	23.155	24.7492	24.4738	24.5812	24.417	+	LFQ intensity LSD1_LFQ intensity NLS	29	29	29	47	47	47	102.02	0	323.31	2210000000	284	2.44282	0.0250468	1.18489	0.525136	Q8IYH5;C9JUA4;C9J283	Q8IYH5	ZZ-type zinc finger-containing protein 3	ZZZ3	3186
22.9079	23.632	23.5983	23.0258	24.275	23.9495	25.1946	24.632	+	LFQ intensity LSD1_LFQ intensity NLS	8	8	2	41.8	41.8	14.4	23.072	0	96.449	2040000000	154	2.01658	0.0250189	1.22175	0.525102	X1WI28;P27635;B8A6G2;A6QRI9	X1WI28;P27635	60S ribosomal protein L10	RPL10	1901
19.2922	19.3921	18.8017	18.6156	19.853	19.9301	20.3857	20.7056	+	LFQ intensity LSD1_LFQ intensity NLS	7	7	7	12.8	12.8	12.8	95.575	0	15.884	67600000	26	2.31373	0.0249989	1.19322	0.52456	Q5VSL9;Q9ULQ0	Q5VSL9	Striatin-interacting protein 1	STRIP1	2891
20.8802	20.6096	19.8284	20.4066	21.9742	21.3321	21.4118	21.7675	+	LFQ intensity LSD1_LFQ intensity NLS	13	13	13	16.1	16.1	16.1	130.32	0	30.222	191000000	25	2.34879	0.0249712	1.19019	0.524456	O75132	O75132	Zinc finger BED domain-containing protein 4	ZBED4	1470
23.7895	23.8191	23.7077	23.7594	24.6865	24.7945	24.9977	24.9495	+	LFQ intensity LSD1_LFQ intensity NLS	26	26	26	53.2	53.2	53.2	68.249	0	198.61	1780000000	252	5.16091	0.0249435	1.0881	0.524302	Q9H9A6	Q9H9A6	Leucine-rich repeat-containing protein 40	LRRC40	3925
19.7812	19.734	19.5299	19.0821	20.7471	20.5451	20.8576	20.5356	+	LFQ intensity LSD1_LFQ intensity NLS	6	6	6	16.1	16.1	16.1	65.111	0	37.991	102000000	41	3.16513	0.0251757	1.13956	0.523225	Q5VV42	Q5VV42	Threonylcarbamoyladenosine tRNA methylthiotransferase	CDKAL1	2902
19.8847	18.1751	17.4176	18.2654	20.265	20.0951	20.4273	18.5488	+	LFQ intensity LSD1_LFQ intensity NLS	6	4	4	18.6	14.3	14.3	47.535	0	10.217	66300000	8	1.07465	0.0251907	1.39832	0.522461	Q13363;D6RAX2;E9PGB1;E7ESU7;E7EPF8;E7EUB3;H0Y8W7;H0Y8U5	Q13363;D6RAX2;E9PGB1;E7ESU7;E7EPF8;E7EUB3	C-terminal-binding protein 1	CTBP1	2539	+
22.7451	22.3962	22.265	22.3565	23.7796	23.6649	23.5045	23.2961	+	LFQ intensity LSD1_LFQ intensity NLS	16	16	16	38	38	38	72.832	0	148.29	797000000	138	3.55183	0.0253729	1.12057	0.521566	Q8N0X7	Q8N0X7	Spartin	SPG20	3199
18.9863	19.654	19.1488	17.799	20.5356	20.1703	19.9601	19.9601	+	LFQ intensity LSD1_LFQ intensity NLS	3	3	3	17.9	17.9	17.9	24.126	0	30.991	56000000	9	1.63741	0.0253172	1.25952	0.521444	E9PME6;B1AQP1;P22415;H0YD59	E9PME6;B1AQP1;P22415	Upstream stimulatory factor 1	USF1	419
21.0292	21.6714	21.8269	22.0426	22.5237	22.5615	23.1301	23.0935	+	LFQ intensity LSD1_LFQ intensity NLS	11	11	11	39.8	39.8	39.8	44.323	0	31.987	287000000	81	2.30942	0.0253713	1.18467	0.521122	E9PM69;R4GNH3;P17980;E9PN50;E9PMD8;E9PKD5;E9PLG2	E9PM69;R4GNH3;P17980;E9PN50;E9PMD8;E9PKD5	26S protease regulatory subunit 6A	PSMC3	788	+
20.8034	20.3645	20.5069	20.5545	21.1703	21.4775	21.9847	22.3184	+	LFQ intensity LSD1_LFQ intensity NLS	9	9	9	7.6	7.6	7.6	186.49	0	29.526	156000000	28	2.31161	0.0254617	1.18041	0.519538	Q15058	Q15058	Kinesin-like protein KIF14	KIF14	2666
24.4298	25.1604	24.558	24.7077	25.7995	25.8504	25.9539	25.7441	+	LFQ intensity LSD1_LFQ intensity NLS	57	57	57	58.4	58.4	58.4	150.78	0	323.31	6300000000	773	3.30144	0.0255163	1.123	0.518612	Q9ULM3;H0Y6M6	Q9ULM3	YEATS domain-containing protein 2	YEATS2	4244
24.8717	24.7594	24.5926	24.7286	26.0772	25.9316	25.6237	25.705	+	LFQ intensity LSD1_LFQ intensity NLS	52	52	52	53	53	53	134.32	0	323.31	4270000000	639	4.04077	0.0257715	1.09629	0.517433	Q96JH7	Q96JH7	Deubiquitinating protein VCIP135	VCPIP1	3561
20.1457	20.2535	20.3962	20.6627	20.7307	21.4775	21.8689	22.2036	+	LFQ intensity LSD1_LFQ intensity NLS	13	11	10	23.8	21.4	18.6	74.222	0	49.14	324000000	57	1.93873	0.0258762	1.20563	0.51613	P51116;I3L1Z2	P51116	Fragile X mental retardation syndrome-related protein 2	FXR2	2151
20.4775	20.5638	20.9459	18.2282	21.3962	21.3101	21.6584	21.265	+	LFQ intensity LSD1_LFQ intensity NLS	6	6	6	22	22	22	35.236	0	16.659	190000000	29	1.13736	0.0259089	1.35356	0.515985	Q9UNQ2;A0A0C4DGB1;D6RCL3	Q9UNQ2;A0A0C4DGB1	Probable dimethyladenosine transferase	DIMT1	4261
24.8623	24.8044	24.5869	24.7995	25.6757	25.7695	25.8881	26.0567	+	LFQ intensity LSD1_LFQ intensity NLS	39	39	39	45.2	45.2	45.2	133.77	0	323.31	5150000000	620	4.38817	0.0259372	1.08424	0.515807	O14654	O14654	Insulin receptor substrate 4	IRS4	1318
18.5204	19.9601	19.1028	18.9082	20.3321	19.4991	20.7223	20.9672	+	LFQ intensity LSD1_LFQ intensity NLS	2	2	2	13.2	13.2	13.2	25.565	0	4.2237	76100000	20	1.52961	0.026324	1.25731	0.514741	P00403	P00403	Cytochrome c oxidase subunit 2	MT-CO2	1626
24.5225	23.9043	23.8576	24.1253	25.228	25.1174	25.141	25.3545	+	LFQ intensity LSD1_LFQ intensity NLS	47	47	47	43.2	43.2	43.2	168.59	0	323.31	3390000000	507	3.33387	0.0269903	1.10781	0.512658	Q8TEQ6	Q8TEQ6	Gem-associated protein 5	GEMIN5	3338
20.7796	21.9531	21.1079	21.6497	22.6186	22.5451	22.4451	22.5261	+	LFQ intensity LSD1_LFQ intensity NLS	24	24	24	8.7	8.7	8.7	593.38	0	69.661	398000000	131	2.322	0.0270603	1.16119	0.512381	O14686;F8VWW4	O14686	Histone-lysine N-methyltransferase 2D	KMT2D	1319
19.8066	19.5375	21.4874	21.1079	22.0292	21.0691	22.1206	21.9098	+	LFQ intensity LSD1_LFQ intensity NLS	11	11	11	23	23	23	79.467	0	65.531	177000000	41	1.28462	0.0271742	1.29731	0.511503	P28331;B4DJ81;F8WDL5;C9JPQ5	P28331;B4DJ81	NADH-ubiquinone oxidoreductase 75 kDa subunit, mitochondrial	NDUFS1	1910	+
19.0715	20.0691	18.4228	18.836	20.0951	20.2185	20.0691	20.9316	+	LFQ intensity LSD1_LFQ intensity NLS	4	4	4	20.7	20.7	20.7	41.236	0.00054245	3.524	73900000	6	1.63966	0.027279	1.2287	0.51095	O75381;K7EK59	O75381	Peroxisomal membrane protein PEX14	PEX14	1488
21.2764	21.5777	22.0625	21.5404	22.7675	22.6298	22.6843	22.8073	+	LFQ intensity LSD1_LFQ intensity NLS	11	11	10	37.3	37.3	34.9	46.939	0	63.613	451000000	94	3.22521	0.0272206	1.10798	0.51092	Q9Y2T2;H0YBM0	Q9Y2T2	AP-3 complex subunit mu-1	AP3M1	4311
16.8113	16.9316	17.7796	18.4815	19.7569	19.3581	18.2232	17.9373	+	LFQ intensity LSD1_LFQ intensity NLS	20	16	1	44.4	38.6	1.3	71.356	0	76.209	337000000	48	1.18016	0.0277051	1.31791	0.509342	O94818	O94818	Nucleolar protein 4	NOL4	1542
22.9006	22.3645	22.9654	22.5892	23.7594	23.6865	23.7389	24.0105	+	LFQ intensity LSD1_LFQ intensity NLS	57	57	57	28	28	28	292.75	0	323.31	1180000000	283	3.35345	0.027949	1.09388	0.506995	Q92616	Q92616	Translational activator GCN1	GCN1L1	3407
20.5915	21.0292	21.002	20.5915	21.6714	21.7389	22.5592	21.7836	+	LFQ intensity LSD1_LFQ intensity NLS	37	37	32	16.4	16.4	15.1	396.21	0	244.78	472000000	103	2.47635	0.0280085	1.13474	0.506212	E7EVZ1;Q86UP3;E5RI93;E5RGK3;E5RHS1;E5RG79;H0YC81	E7EVZ1;Q86UP3	Zinc finger homeobox protein 4	ZFHX4	710
20.7389	21.6231	21.9985	21.7796	22.6186	22.3936	22.7915	22.9951	+	LFQ intensity LSD1_LFQ intensity NLS	12	12	12	32.2	32.2	32.2	55.52	0	74.539	412000000	110	2.06043	0.0280592	1.16469	0.505414	P43490;A0A0C4DFS8;C9JF35;C9JG65	P43490;A0A0C4DFS8	Nicotinamide phosphoribosyltransferase	NAMPT	2057
24.6264	24.632	24.0691	24.6264	25.726	25.6125	25.6292	25.3511	+	LFQ intensity LSD1_LFQ intensity NLS	18	18	18	65.3	65.3	65.3	33.777	0	142.67	5180000000	344	3.29469	0.0281436	1.0912	0.504909	P46109	P46109	Crk-like protein	CRKL	2070
19.7439	19.586	18.4211	19.8586	21.2185	20.4874	20.1946	20.5451	+	LFQ intensity LSD1_LFQ intensity NLS	9	9	9	37.5	37.5	37.5	37.629	0	73.769	136000000	33	1.64857	0.0282065	1.209	0.504555	Q5PSV4;H0YHD0	Q5PSV4;H0YHD0	Breast cancer metastasis-suppressor 1-like protein	BRMS1L	2838
19.2302	18.5533	19.3145	19.5053	21.2877	20.2535	19.9601	19.9054	+	LFQ intensity LSD1_LFQ intensity NLS	2	2	2	10.2	10.2	10.2	29.484	0	19.936	66900000	13	1.69798	0.0282442	1.20083	0.504058	Q96BD8;K7EPW0;K7EP61	Q96BD8;K7EPW0;K7EP61	Spindle and kinetochore-associated protein 1	SKA1	3473
18.504	17.6097	19.0976	18.4681	19.3495	19.4108	19.4952	20.1825	+	LFQ intensity LSD1_LFQ intensity NLS	3	3	3	4.1	4.1	4.1	138.62	0	8.9338	73200000	25	1.77689	0.0282692	1.18967	0.503641	O00411;K7EMH3	O00411	DNA-directed RNA polymerase, mitochondrial	POLRMT	1292
24.0854	24.2096	24.5344	24.3239	25.0233	25.3066	25.4923	25.7024	+	LFQ intensity LSD1_LFQ intensity NLS	32	32	28	58.6	58.6	52.8	79.372	0	270.64	3240000000	447	3.13602	0.0284281	1.09282	0.50295	E7ESY4;Q13330;H0Y4T7;F8VSM3;F8W9Y9;F8VPC5;H0YIV8;H7C3F3;C9JJM0	E7ESY4;Q13330;H0Y4T7	Metastasis-associated protein MTA1	MTA1	694	+
18.2568	19.0938	17.8209	18.4447	20.1332	20.1581	20.2302	18.2277	+	LFQ intensity LSD1_LFQ intensity NLS	7	7	7	14.8	14.8	14.8	103.96	0	9.9109	77200000	11	1.2233	0.0285948	1.28324	0.502415	Q96JK2;Q8TBB7;G3V3S1	Q96JK2	DDB1- and CUL4-associated factor 5	DCAF5	3562
20.5165	20.265	18.8305	18.8736	21.0426	20.4066	21.2593	20.7634	+	LFQ intensity LSD1_LFQ intensity NLS	10	10	10	24.2	24.2	24.2	78.15	0	32.784	167000000	45	1.37752	0.0285762	1.24657	0.501902	F8W6N3;Q92560;H0Y8E8;F8WEY5;C9J7L9	F8W6N3;Q92560	Ubiquitin carboxyl-terminal hydrolase;Ubiquitin carboxyl-terminal hydrolase BAP1	BAP1	920
21.7389	21.6231	21.502	21.9243	22.6928	22.9261	22.7695	22.5983	+	LFQ intensity LSD1_LFQ intensity NLS	9	9	9	23.1	23.1	23.1	36.034	0	19.949	538000000	88	4.04456	0.0294587	1.04961	0.496625	Q9NZ01;M0R3C3;M0QXM3	Q9NZ01;M0R3C3	Very-long-chain enoyl-CoA reductase	TECR	4102
19.7521	19.4913	20.1581	19.8995	21.0821	20.895	21.1642	20.5165	+	LFQ intensity LSD1_LFQ intensity NLS	4	4	4	15.1	15.1	15.1	34.012	0	30.633	125000000	40	2.7923	0.0297137	1.08925	0.495004	P53007;B4DP62	P53007;B4DP62	Tricarboxylate transport protein, mitochondrial	SLC25A1	2193
24.6153	24.8142	24.8481	24.6096	25.6891	25.7441	25.9517	25.6348	+	LFQ intensity LSD1_LFQ intensity NLS	69	69	69	47.9	47.9	47.9	189.03	0	323.31	5040000000	770	4.47235	0.0300473	1.03313	0.493379	Q9UK61;A0A087X0F1	Q9UK61;A0A087X0F1	Protein FAM208A	FAM208A	4215
24.4923	24.5045	25.0526	24.9933	25.5898	25.6703	26.1293	25.9912	+	LFQ intensity LSD1_LFQ intensity NLS	126	126	126	34.1	34.1	34.1	532.4	0	323.31	4300000000	870	2.8	0.0300164	1.08448	0.493185	Q14204;H0YJ21	Q14204	Cytoplasmic dynein 1 heavy chain 1	DYNC1H1	2604
18.1254	18.9175	18.0281	18.5297	19.4933	19.528	19.6276	19.3167	+	LFQ intensity LSD1_LFQ intensity NLS	4	4	4	7.2	7.2	7.2	115.08	0	11.753	65600000	20	2.65458	0.030039	1.09122	0.492906	Q8NB46	Q8NB46	Serine/threonine-protein phosphatase 6 regulatory ankyrin repeat subunit C	ANKRD52	3255
22.3538	22.0122	22.0156	22.1581	23.2961	23.0918	22.9388	23.417	+	LFQ intensity LSD1_LFQ intensity NLS	18	18	18	28	28	28	123.11	0	137.73	595000000	165	3.65659	0.0299775	1.051	0.492666	Q92625	Q92625	Ankyrin repeat and SAM domain-containing protein 1A	ANKS1A	3411
20.9024	20.8113	20.6453	20.8727	21.7307	21.7675	21.6364	22.3962	+	LFQ intensity LSD1_LFQ intensity NLS	10	10	10	15.1	15.1	15.1	111.08	0	28.188	252000000	62	2.97144	0.030045	1.0748	0.492427	Q9Y6Y8;A0A0C4DH82;H7C0V8;H7C4C4	Q9Y6Y8	SEC23-interacting protein	SEC23IP	4400
26.7389	26.673	25.918	25.9043	27.6931	27.391	27.3239	27.2445	+	LFQ intensity LSD1_LFQ intensity NLS	91	91	56	47.2	47.2	32.5	290.52	0	323.31	15900000000	1419	2.34966	0.030151	1.10456	0.490941	Q9HCK8;H0YJA4;G3V2T9;G3V303	Q9HCK8	Chromodomain-helicase-DNA-binding protein 8	CHD8	3955
21.391	21.1946	21.2361	21.1269	22.0054	21.9777	22.7223	22.5545	+	LFQ intensity LSD1_LFQ intensity NLS	28	28	28	18.4	18.4	18.4	261.51	0	150.93	306000000	99	2.79649	0.0301814	1.07783	0.490366	Q07864;F5H1D6;F5H7E4	Q07864;F5H1D6	DNA polymerase epsilon catalytic subunit A;DNA polymerase	POLE	2459
21.9777	22.1206	21.632	21.3211	22.8895	22.8614	22.7077	22.8595	+	LFQ intensity LSD1_LFQ intensity NLS	15	15	15	36.5	36.5	36.5	78.21	0	40.864	431000000	105	2.93626	0.030935	1.06663	0.488361	Q8IZ21	Q8IZ21	Phosphatase and actin regulator 4	PHACTR4	3191
24.4425	24.5696	24.1642	24.3511	25.5105	25.4457	25.1719	25.5374	+	LFQ intensity LSD1_LFQ intensity NLS	41	41	41	53.6	53.6	53.6	118.87	0	240.89	3580000000	512	3.88249	0.0309563	1.0345	0.488083	Q9ULJ3;Q5KS07;E7EVF9	Q9ULJ3	Zinc finger and BTB domain-containing protein 21	ZBTB21	4241
23.7594	23.8576	23.4298	23.5285	24.5344	24.6649	25.1174	24.4984	+	LFQ intensity LSD1_LFQ intensity NLS	19	15	15	48.6	39.3	39.3	55.364	0	254.82	4240000000	250	3.0557	0.0311318	1.05998	0.487662	Q92769;H3BM24;E5RFI6;E5RJ04;E5RGV4;E5RHE7;E5RH52;E5RG37;E5RFP9	Q92769	Histone deacetylase 2	HDAC2	3419	+
21.7512	22.0854	21.0559	21.6051	22.9043	22.7755	22.4972	22.6584	+	LFQ intensity LSD1_LFQ intensity NLS	16	16	16	25	25	25	134.36	0	72.658	577000000	145	2.47261	0.0318061	1.08444	0.486005	Q5T481	Q5T481	RNA-binding protein 20	RBM20	2862
22.7935	23.0902	23.0054	23.2288	23.9225	23.9495	24.0854	24.2463	+	LFQ intensity LSD1_LFQ intensity NLS	32	32	17	31.7	31.7	19.1	164.19	0	289.55	1380000000	282	3.89216	0.0327768	1.02144	0.482371	P39880	P39880	Homeobox protein cut-like 1	CUX1	2014
24.5225	23.867	24.1488	23.8288	25.2244	25.1681	24.9716	25.1833	+	LFQ intensity LSD1_LFQ intensity NLS	30	30	9	36.7	36.7	12.5	141.29	0	260.55	2820000000	437	3.07187	0.0329461	1.04503	0.481593	Q9C0C9;K7EQ12	Q9C0C9	E2/E3 hybrid ubiquitin-protein ligase UBE2O	UBE2O	3806
19.9882	17.5506	20.1581	19.0712	20.5165	20.3211	20.4576	20.4775	+	LFQ intensity LSD1_LFQ intensity NLS	5	5	5	14.1	14.1	14.1	50.519	0	24.11	75100000	15	1.08877	0.0329133	1.25121	0.48152	Q9HD26;F5H1Y4	Q9HD26;F5H1Y4	Golgi-associated PDZ and coiled-coil motif-containing protein	GOPC	3963
21.1519	20.9388	20.5451	20.9388	22.4626	21.7836	21.5777	22.0326	+	LFQ intensity LSD1_LFQ intensity NLS	14	14	1	23.4	23.4	2.2	88.843	0	323.31	379000000	119	2.46988	0.0334712	1.07049	0.480332	Q9H8E8	Q9H8E8	Cysteine-rich protein 2-binding protein	CSRP2BP	3913
19.64	19.547	19.8817	19.9601	21.0224	20.5069	20.9531	20.68	+	LFQ intensity LSD1_LFQ intensity NLS	11	11	11	10.8	10.8	10.8	194.86	0	150.08	115000000	36	3.26231	0.0336087	1.0334	0.479588	Q9HCM1;J3KPI3	Q9HCM1	Uncharacterized protein KIAA1551	KIAA1551	3956
19.9083	19.7683	21.3321	20.1703	21.1765	21.6186	21.6757	21.265	+	LFQ intensity LSD1_LFQ intensity NLS	6	6	6	24.2	24.2	24.2	42.272	0	34.324	182000000	29	1.63183	0.0336786	1.13919	0.479255	P51570;K7ERJ9;K7EII7	P51570	Galactokinase	GALK1	2162
18.6627	17.4469	17.5334	17.4155	18.6132	18.8847	18.8484	19.1581	+	LFQ intensity LSD1_LFQ intensity NLS	9	5	5	17.4	8.7	8.7	68.934	0	8.0818	28200000	15	1.8751	0.0336967	1.11145	0.478977	Q9H0B6;A8MZ87	Q9H0B6;A8MZ87	Kinesin light chain 2	KLC2	3823
24.3645	24.1015	23.632	23.8764	24.9933	25.1449	24.9134	25.0691	+	LFQ intensity LSD1_LFQ intensity NLS	34	34	33	36.7	36.7	36	142.69	0	271.8	2130000000	331	3.13282	0.0336634	1.03657	0.478974	Q9H2G2	Q9H2G2	STE20-like serine/threonine-protein kinase	SLK	3847
20.0426	19.9024	20.2989	20.1206	20.9171	20.8191	21.6453	21.1946	+	LFQ intensity LSD1_LFQ intensity NLS	11	11	11	16.1	16.1	16.1	116.07	0	20.654	160000000	25	2.69363	0.0337396	1.05287	0.477995	V9GYM8;Q92974;V9GYF5;V9GYG5;V9GZ14;V9GYF0;V9GZ58	V9GYM8;Q92974	Rho guanine nucleotide exchange factor 2	ARHGEF2	3436
21.4526	21.7594	22.4041	22.3511	23.2346	22.7573	23.0258	23.2678	+	LFQ intensity LSD1_LFQ intensity NLS	12	12	12	50.3	50.3	50.3	32.182	0	79.365	555000000	98	2.22403	0.0337283	1.07962	0.477756	I3L1P8;Q02978	I3L1P8;Q02978	Mitochondrial 2-oxoglutarate/malate carrier protein	SLC25A11	1139
20.7307	22.0292	20.7307	21.5638	21.9024	22.7035	22.6276	22.343	+	LFQ intensity LSD1_LFQ intensity NLS	31	31	31	24.5	24.5	24.5	226.35	0	218.7	607000000	111	1.65268	0.034061	1.13053	0.477104	O60293;G3V1X1	O60293	Zinc finger C3H1 domain-containing protein	ZFC3H1	1431
19.3419	17.3117	19.7323	17.3651	20.002	18.4891	20.0292	20.5261	+	LFQ intensity LSD1_LFQ intensity NLS	3	3	3	3.5	3.5	3.5	105.7	0	4.0519	76000000	17	0.855991	0.0340118	1.32383	0.476709	F6WR09;Q9ULJ6;E7EWM3;A0A087X127;Q8NF64	F6WR09;Q9ULJ6;E7EWM3;A0A087X127;Q8NF64	Zinc finger MIZ domain-containing protein 1;Zinc finger MIZ domain-containing protein 2	ZMIZ1;ZMIZ2	881
21.0156	21.3699	21.5545	21.0886	22.2273	22.1612	22.0224	22.8442	+	LFQ intensity LSD1_LFQ intensity NLS	28	28	28	17.5	17.5	17.5	224.29	0	96.357	415000000	66	2.51656	0.0342605	1.05662	0.47579	Q7RTP6;J3KSK6;J3QQT0;E9PP85;C9J922;J3KRP8	Q7RTP6	Protein-methionine sulfoxide oxidase MICAL3	MICAL3	3053
20.9171	20.4775	20.3101	18.4141	20.9098	21.1703	21.1332	21.8307	+	LFQ intensity LSD1_LFQ intensity NLS	9	9	9	20.6	20.6	20.6	63.887	0	19.703	167000000	43	1.09073	0.034227	1.23131	0.475773	O00311;B1AMW7	O00311	Cell division cycle 7-related protein kinase	CDC7	1289
21.8576	21.7265	22.937	18.0487	23.4298	22.2564	22.5615	22.1976	+	LFQ intensity LSD1_LFQ intensity NLS	4	4	4	54.6	54.6	54.6	13.281	0	35.876	635000000	67	0.635434	0.0350409	1.46889	0.473294	P62314;J3QLI9;J3QLR7	P62314;J3QLI9	Small nuclear ribonucleoprotein Sm D1	SNRPD1	2317
17.8076	17.7961	19.4714	18.1475	19.5638	19.6523	19.1357	19.4339	+	LFQ intensity LSD1_LFQ intensity NLS	5	5	2	14.8	14.8	8.1	47.314	0	9.3805	100000000	19	1.4856	0.0350233	1.14077	0.47281	P57073	P57073	Transcription factor SOX-8	SOX8	2244
21.9637	21.7223	21.5685	21.1765	22.5451	22.6779	22.3565	23.0393	+	LFQ intensity LSD1_LFQ intensity NLS	12	12	11	46.3	46.3	43.3	45.626	0	44.81	339000000	82	2.51192	0.0353682	1.04695	0.471761	P62195;J3QSA9;J3QQM1;J3QLH6;J3KRP2;J3QSE0;J3QRW1;J3QRR3;J3KTQ9	P62195;J3QSA9;J3QQM1;J3QLH6;J3KRP2;J3QSE0	26S protease regulatory subunit 8	PSMC5	2303
20.6006	20.0156	20.0691	20.3321	21.2877	21.2764	21.2066	21.2764	+	LFQ intensity LSD1_LFQ intensity NLS	15	15	15	18.3	18.3	18.3	135.78	0	46.057	187000000	67	3.51018	0.0354501	1.00742	0.471676	Q13136;E9PJZ7;H0YEF9;H0YDW2;H0YD72;H0YHK3;G3V200;O75334;H0YF15;R4GNF1;E9PPF6;H0YIJ4;H0YHJ4;H0YH95;R4GN36;M0QZB5;B1APN9;O75335;O75145	Q13136;E9PJZ7	Liprin-alpha-1	PPFIA1	2520
19.9742	20.0156	19.9882	20.0559	20.8113	20.7553	21.0359	21.4626	+	LFQ intensity LSD1_LFQ intensity NLS	11	11	11	32.1	32.1	32.1	57.563	0	72.391	149000000	47	3.10321	0.0368654	1.00781	0.466219	Q9Y285;K7ER00;K7EPH2;K7ER16;K7EK06;K7ERS0	Q9Y285;K7ER00;K7EPH2	Phenylalanine--tRNA ligase alpha subunit	FARSA	4296
21.6231	22.7451	23.0526	22.8745	23.5754	23.417	23.6209	24.0608	+	LFQ intensity LSD1_LFQ intensity NLS	23	23	23	52.7	52.7	52.7	48.633	0	133.6	672000000	124	1.6843	0.037048	1.0947	0.465572	P35998;C9JLS9	P35998	26S protease regulatory subunit 7	PSMC2	1991
22.9654	23.1127	22.6907	23.2346	23.8576	24.0526	23.867	24.217	+	LFQ intensity LSD1_LFQ intensity NLS	30	30	2	34.3	34.3	2	146.2	0	323.31	990000000	274	3.33227	0.0370662	0.997676	0.465112	O60271;D6RHI8	O60271	C-Jun-amino-terminal kinase-interacting protein 4	SPAG9	1429
19.6186	19.5545	19.4435	19.5805	20.5069	20.3538	20.3211	21.0559	+	LFQ intensity LSD1_LFQ intensity NLS	8	8	8	19.4	19.4	19.4	62.974	0	22.466	97900000	20	2.93469	0.037045	1.01014	0.464543	Q969V3;K7ENM2;K7EMW4;K7ELZ9;A0A0C4DGP7;K7EQ66	Q969V3;K7ENM2;K7EMW4;K7ELZ9;A0A0C4DGP7	Nicalin	NCLN	3459
24.3443	24.8858	25.895	25.2426	26.2335	26.0752	26.228	26.1546	+	LFQ intensity LSD1_LFQ intensity NLS	25	25	25	53.7	53.7	53.7	59.75	0	274.48	4790000000	380	1.78615	0.0370096	1.08089	0.464436	P25705;K7EK77;K7ERX7;K7EJP1;K7EQH4;K7ENJ4;K7ESA0	P25705	ATP synthase subunit alpha, mitochondrial	ATP5A1	1884
20.1703	17.8782	20.2764	20.1332	20.6186	20.9742	20.7955	20.8651	+	LFQ intensity LSD1_LFQ intensity NLS	6	6	6	11.2	11.2	11.2	96.631	0	10.635	136000000	17	1.0652	0.0371614	1.19885	0.463884	Q6P3X3;H7C3A3	Q6P3X3	Tetratricopeptide repeat protein 27	TTC27	2980
22.2877	22.7975	22.1301	22.2849	23.391	23.2273	23.3376	23.5522	+	LFQ intensity LSD1_LFQ intensity NLS	29	29	29	35.3	35.3	35.3	151.66	0	143.31	603000000	198	3.10669	0.0373244	1.00196	0.463768	Q6P2E9;I3L2F4;I3L3M2	Q6P2E9	Enhancer of mRNA-decapping protein 4	EDC4	2977
24.0105	24.1642	24.0526	24.1488	25.0401	25.0526	24.9628	25.1174	+	LFQ intensity LSD1_LFQ intensity NLS	45	45	45	35.9	35.9	35.9	213.62	0	323.31	2620000000	474	5.917	0.0372888	0.949192	0.463269	P35658;A0A0A0MSW3;H0YF36;H0Y837;B7ZAV2;E9PKD2;H0YDS4	P35658;A0A0A0MSW3	Nuclear pore complex protein Nup214	NUP214	1987
17.5281	19.4313	18.3558	19.6435	20.1825	19.8906	19.7089	19.8018	+	LFQ intensity LSD1_LFQ intensity NLS	5	5	5	9.5	9.5	9.5	120.74	0	24.644	57200000	16	1.21313	0.0375718	1.15628	0.46195	B7ZM87;A2RUF3;O75044;A0A075B7E9;Q5VZB4;A0A075B7B5;G5EA48;Q7Z6B7	B7ZM87;A2RUF3;O75044	SLIT-ROBO Rho GTPase-activating protein 2	SRGAP2	347
18.3513	19.5537	18.8506	18.0593	19.8484	19.4775	19.9882	19.8097	+	LFQ intensity LSD1_LFQ intensity NLS	4	4	3	28.1	28.1	23.3	22.81	0	13.566	71300000	18	1.69054	0.0381629	1.07722	0.459479	Q4VC05	Q4VC05	B-cell CLL/lymphoma 7 protein family member A	BCL7A	2789
21.0359	21.6096	21.8499	21.7876	22.2506	22.7056	22.695	22.6992	+	LFQ intensity LSD1_LFQ intensity NLS	26	26	26	17.2	17.2	17.2	227.92	0	89.188	442000000	91	2.47368	0.0383705	1.01683	0.458694	Q92621;U3KPX2;U3KQ47;U3KQ97	Q92621	Nuclear pore complex protein Nup205	NUP205	3410
18.585	19.778	18.9816	17.3351	20.1206	19.9459	19.4894	19.7602	+	LFQ intensity LSD1_LFQ intensity NLS	3	3	3	20.4	20.4	20.4	29.233	0	7.8834	64400000	13	1.15394	0.0383343	1.1591	0.458689	Q9BSF4;K7ENF5	Q9BSF4	Uncharacterized protein C19orf52	C19orf52	3702
18.7851	20.2877	20.8499	20.6627	19.9882	21.2361	22.4221	21.895	+	LFQ intensity LSD1_LFQ intensity NLS	8	8	8	8.8	8.8	8.8	188.91	0	29.014	186000000	55	0.89002	0.0382981	1.23896	0.458233	Q13029	Q13029	PR domain zinc finger protein 2	PRDM2	2508
20.3101	20.8034	21.1457	18.1919	21.6843	21.5961	21.2764	20.8191	+	LFQ intensity LSD1_LFQ intensity NLS	10	10	10	18.8	18.8	18.8	81.957	0	60.105	198000000	23	0.902628	0.038262	1.23119	0.4575	O14867;C9JMP6;C9IYR0;C9IYH8;M0QZP0;H7C4B6	O14867	Transcription regulator protein BACH1	BACH1	1328
24.6209	24.2607	24.019	24.3307	25.228	25.1719	25.1795	25.5983	+	LFQ intensity LSD1_LFQ intensity NLS	34	33	15	52.3	51.2	29.7	102.29	0	321.6	3120000000	459	3.07097	0.0386955	0.986599	0.456653	A0A0A0MRA8;Q9Y2J2;J3QS55;J3KT37;J3KS70;J3QKY2;J3KRD1;J3QKK4;J3QR33;J3QRQ6;J3QLU5;J3QS83	A0A0A0MRA8;Q9Y2J2	Band 4.1-like protein 3;Band 4.1-like protein 3, N-terminally processed	EPB41L3	194
20.9098	21.4324	20.8576	21.2933	21.8461	22.3884	22.1269	22.1047	+	LFQ intensity LSD1_LFQ intensity NLS	11	11	11	31.1	31.1	31.1	55.517	0	54.751	393000000	87	2.82952	0.0387589	0.99327	0.455671	E7EPP6;O14757;J3KN87;E9PPA5;A0A087WY91;E9PJI4;E9PKQ3;A0A087WT52	E7EPP6;O14757;J3KN87	Serine/threonine-protein kinase Chk1	CHEK1	673
17.7776	19.9068	16.916	20.1825	19.8484	20.4576	20.002	19.6096	+	LFQ intensity LSD1_LFQ intensity NLS	9	9	9	22.7	22.7	22.7	87.882	0	64.075	75300000	20	0.773248	0.0388609	1.28366	0.455183	A0A087X0M0;Q7Z5L2	A0A087X0M0;Q7Z5L2	Coiled-coil domain-containing protein R3HCC1L	R3HCC1L	138
20.9316	20.2989	21.3321	18.4938	21.3321	21.6497	21.5404	21.3156	+	LFQ intensity LSD1_LFQ intensity NLS	5	5	5	6.8	6.8	6.8	119.94	0	50.073	184000000	32	0.967853	0.0392917	1.19535	0.454068	O15397;H0YH64	O15397	Importin-8	IPO8	1369
24.8481	24.2535	24.6703	24.6811	25.8336	25.4831	25.7771	25.3101	+	LFQ intensity LSD1_LFQ intensity NLS	14	14	11	45.4	45.4	37.4	40.736	0	311.03	3300000000	214	2.85161	0.039546	0.987721	0.453701	P55036;Q5VWC4;A6PVX3;H0Y3Y9;H0Y561	P55036;Q5VWC4;A6PVX3	26S proteasome non-ATPase regulatory subunit 4	PSMD4	2216
19.6228	17.5855	20.8876	21.2535	21.8689	20.8876	20.4874	21.3266	+	LFQ intensity LSD1_LFQ intensity NLS	8	8	8	23.5	23.5	23.5	47.463	0	30.418	122000000	22	0.725177	0.0395428	1.30527	0.453307	O00231;J3QRY4;J3QS13	O00231	26S proteasome non-ATPase regulatory subunit 11	PSMD11	1277
19.7089	20.2419	20.2066	20.1332	20.0821	20.9388	22.0224	21.6843	+	LFQ intensity LSD1_LFQ intensity NLS	15	15	15	13.1	13.1	13.1	217.95	0	56.485	209000000	72	1.31769	0.0395655	1.10925	0.453099	Q13129	Q13129	Zinc finger protein Rlf	RLF	2519
20.4066	19.6186	20.8876	20.0292	21.0493	21.4775	21.4775	21.0951	+	LFQ intensity LSD1_LFQ intensity NLS	18	18	17	17.9	17.9	17.9	156.27	0	66.484	212000000	38	1.90523	0.0396252	1.03933	0.452902	Q86UP2;G3V4Y7;B7Z6P3;G3V5P0;H0YJP2;H0YJZ8;G3V5G2;H0YJV5	Q86UP2;G3V4Y7	Kinectin	KTN1	3107
22.0625	23.0002	22.9459	23.4676	23.4425	23.895	24.2096	24.1719	+	LFQ intensity LSD1_LFQ intensity NLS	66	55	53	31.5	28.4	27.8	335.92	0	306.17	1370000000	339	1.67379	0.0396997	1.06068	0.452804	Q9P2D1	Q9P2D1	Chromodomain-helicase-DNA-binding protein 7	CHD7	4133
18.1021	18.1786	19.203	18.5071	19.0074	19.4456	20.2989	19.5223	+	LFQ intensity LSD1_LFQ intensity NLS	3	3	3	8.9	8.9	8.9	62.924	0	8.2414	42000000	18	1.57081	0.0399111	1.07085	0.4523	O15270;H0YJV2	O15270;H0YJV2	Serine palmitoyltransferase 2	SPTLC2	1361
20.343	21.4476	19.6835	20.1946	20.9316	21.5869	21.8152	21.7098	+	LFQ intensity LSD1_LFQ intensity NLS	16	16	16	24	24	24	111.83	0	70.39	239000000	68	1.38893	0.0398854	1.0937	0.451724	P54198	P54198	Protein HIRA	HIRA	2208
20.3962	20.1206	20.3645	19.8253	21.4324	21.0559	21.0821	21.0359	+	LFQ intensity LSD1_LFQ intensity NLS	8	8	8	19.4	19.4	19.4	66.155	0	62.27	180000000	31	3.01755	0.0400923	0.974904	0.450854	O75529	O75529	TAF5-like RNA polymerase II p300/CBP-associated factor-associated factor 65 kDa subunit 5L	TAF5L	1503
20.4273	20.8727	20.3211	20.5165	21.3266	21.4526	21.3156	22.0156	+	LFQ intensity LSD1_LFQ intensity NLS	10	10	10	40.3	40.3	40.3	34.856	0	82.965	175000000	49	2.55008	0.0401587	0.993225	0.450586	Q9UNE7;H3BS86;H3BUD0;H3BTA3	Q9UNE7;H3BS86;H3BUD0	E3 ubiquitin-protein ligase CHIP	STUB1	4258
19.4536	19.5526	19.9882	20.2877	20.8876	20.6186	20.9098	20.8269	+	LFQ intensity LSD1_LFQ intensity NLS	5	5	2	12.7	12.7	5	62.606	0	14.557	145000000	45	2.53334	0.0409052	0.990194	0.449013	A0A0A0MT11;Q13555;Q5SWX3;A0A0A0MS52;Q8WU40;H0Y6G2;H7BXS4;D6RHX9;E9PBE8;E7EQE4;H7C394	A0A0A0MT11;Q13555;Q5SWX3;A0A0A0MS52;Q8WU40	Calcium/calmodulin-dependent protein kinase type II subunit gamma	CAMK2G	237
18.3564	17.2965	18.3353	19.6747	20.0951	19.9601	20.7056	17.8911	+	LFQ intensity LSD1_LFQ intensity NLS	7	3	3	17.6	7.5	7.5	61.257	0	9.8293	84500000	16	0.790235	0.0411103	1.24725	0.448236	A6PW57;Q99755;A6PW58;A2A5X0	A6PW57;Q99755	Phosphatidylinositol 4-phosphate 5-kinase type-1 alpha	PIP5K1A	378
20.1332	20.0951	20.3645	20.8727	21.7307	21.1079	20.8034	21.9951	+	LFQ intensity LSD1_LFQ intensity NLS	9	7	7	20.2	17.9	17.9	80.595	0	11.788	179000000	24	1.72085	0.0411706	1.04289	0.448034	Q9NRL3;F5GYK2;M0R317;M0R0P4;M0R0W8;M0QXN2;M0R2A7;M0QYS2;R4GN16;M0QZM0	Q9NRL3;F5GYK2	Striatin-4	STRN4	4005
19.4066	18.6453	18.5628	18.2697	19.1605	19.9459	19.7876	20.1457	+	LFQ intensity LSD1_LFQ intensity NLS	5	5	5	6.9	6.9	6.9	106.83	0	92.377	49200000	24	1.74212	0.0412187	1.03882	0.447289	Q9NVH2;A0A087WXK3;A0A087WYC2	Q9NVH2	Integrator complex subunit 7	INTS7	4047
18.7039	18.8428	19.68	18.7923	20.1457	19.2442	20.4874	20.3645	+	LFQ intensity LSD1_LFQ intensity NLS	2	2	2	12.6	12.6	12.6	19.77	0	34.76	79600000	33	1.57591	0.0412285	1.05571	0.447096	F5H5N1;A0A087WXF6;A0A087WTI3;F5GXJ1;O75251	F5H5N1;A0A087WXF6;A0A087WTI3;F5GXJ1;O75251	NADH dehydrogenase [ubiquinone] iron-sulfur protein 7, mitochondrial	NDUFS7	29
25.2463	24.9584	24.391	24.5926	25.8528	25.8336	25.6237	25.8069	+	LFQ intensity LSD1_LFQ intensity NLS	34	34	2	42.4	42.4	2.1	97.016	0	323.31	4330000000	481	2.59933	0.0411909	0.982177	0.446963	P11171	P11171	Protein 4.1	EPB41	1729
25.5014	25.6891	25.8881	25.8881	26.6998	26.452	26.8858	26.726	+	LFQ intensity LSD1_LFQ intensity NLS	129	129	129	36	36	36	469.08	0	323.31	7500000000	1375	3.49111	0.0416372	0.949191	0.445837	P78527;F5GX40;H0YG84	P78527	DNA-dependent protein kinase catalytic subunit	PRKDC	2375
18.2702	18.8238	18.8752	18.712	19.6258	19.4252	19.5337	19.9882	+	LFQ intensity LSD1_LFQ intensity NLS	6	6	6	15.8	15.8	15.8	64.97	0	11.441	74400000	25	2.73286	0.0415993	0.972947	0.445495	P17098;K7EQD1	P17098	Zinc finger protein 8	ZNF8	1798
19.615	20.0821	19.5204	19.8712	20.6364	20.6627	20.6006	21.0224	+	LFQ intensity LSD1_LFQ intensity NLS	7	6	6	21.4	20.2	20.2	61.687	0	21.194	92300000	43	3.00333	0.0421146	0.958375	0.443569	Q8IU81	Q8IU81	Interferon regulatory factor 2-binding protein 1	IRF2BP1	3142
22.5915	22.1015	22.8557	22.1642	23.5983	23.4551	23.3778	23.178	+	LFQ intensity LSD1_LFQ intensity NLS	6	6	6	48.9	48.9	48.9	25.863	0	118.91	542000000	79	2.55851	0.0424364	0.974093	0.442856	Q9NYP9	Q9NYP9	Protein Mis18-alpha	MIS18A	4097
22.3672	22.8269	22.5938	22.1825	22.8576	23.6649	23.8576	23.5869	+	LFQ intensity LSD1_LFQ intensity NLS	37	37	37	27.4	27.4	27.4	212.67	0	188.21	1330000000	295	2.0718	0.0425603	0.999152	0.442175	P21675;Q8IZX4;H0Y9L7;H7BY98;H7C2K9;H0Y8N6	P21675;Q8IZX4	Transcription initiation factor TFIID subunit 1;Transcription initiation factor TFIID subunit 1-like	TAF1;TAF1L	1842
19.8346	19.575	17.5437	17.9088	19.8965	20.1581	19.0142	20.4874	+	LFQ intensity LSD1_LFQ intensity NLS	4	4	4	12.6	12.6	12.6	66.958	0	14.713	88100000	10	0.902315	0.0429249	1.17354	0.441353	Q6UUV7;H0YK33	Q6UUV7	CREB-regulated transcription coactivator 3	CRTC3	3005
20.1457	21.417	22.3184	21.7265	20.9316	22.8614	23.4551	23.184	+	LFQ intensity LSD1_LFQ intensity NLS	5	5	5	23.8	23.8	23.8	35.348	0	22.809	446000000	40	0.821083	0.0429729	1.20613	0.44132	Q13155;F8W950;A8MU58;F8WCL2	Q13155;F8W950;A8MU58	Aminoacyl tRNA synthase complex-interacting multifunctional protein 2	AIMP2	2523
22.9061	22.5708	22.6141	22.7735	23.6431	23.6209	23.4923	23.8191	+	LFQ intensity LSD1_LFQ intensity NLS	27	25	25	34.9	31.8	31.8	113.66	0	139.04	903000000	145	4.00074	0.0429341	0.927681	0.44131	Q5VTR2;C9J0A5;C9JXC9;C9JWJ4	Q5VTR2	E3 ubiquitin-protein ligase BRE1A	RNF20	2897
21.7594	21.5685	21.6276	21.391	22.6497	22.6606	22.0359	22.8708	+	LFQ intensity LSD1_LFQ intensity NLS	7	7	7	21.5	21.5	21.5	39.646	0	60.53	364000000	95	2.5867	0.043	0.967625	0.440698	Q3ZCQ8;M0R0C3;M0R2F8;M0R047;M0QXC3;M0R2Z3;M0R303;M0R2D2;M0R1Y4;M0R003	Q3ZCQ8;M0R0C3;M0R2F8	Mitochondrial import inner membrane translocase subunit TIM50	TIMM50	2782	+
19.9742	19.8772	19.7731	17.6375	20.3962	20.1703	20.7553	20.4576	+	LFQ intensity LSD1_LFQ intensity NLS	8	8	8	17.3	17.3	17.3	58.687	0	10.143	114000000	16	1.01541	0.0441041	1.12939	0.438828	Q08209;E7ETC2;E9PPC8;E9PK68;Q5F2F8;P16298;P48454;H0YB02;Q5F2G0;H0YC26;G3V111	Q08209;E7ETC2;E9PPC8;E9PK68;Q5F2F8;P16298	Serine/threonine-protein phosphatase 2B catalytic subunit alpha isoform;Serine/threonine-protein phosphatase;Serine/threonine-protein phosphatase 2B catalytic subunit beta isoform	PPP3CA;PPP3CB	2461
18.7072	18.6024	18.6835	18.5805	19.901	19.4795	19.3921	19.5127	+	LFQ intensity LSD1_LFQ intensity NLS	5	5	5	12.9	12.9	12.9	63.277	0	11.935	46800000	16	3.67267	0.0444951	0.927894	0.438327	Q9NVH1;B1AK20;Q5TH61	Q9NVH1	DnaJ homolog subfamily C member 11	DNAJC11	4046
19.0612	19.0691	18.4087	18.68	19.9068	19.9272	19.4676	19.7586	+	LFQ intensity LSD1_LFQ intensity NLS	4	4	4	14	14	14	48.349	0	32.707	67800000	24	2.60976	0.0446882	0.960313	0.438075	O75616;K7EQJ8;J3QSB2;J3QRV9;J3QT61	O75616;K7EQJ8;J3QSB2;J3QRV9	GTPase Era, mitochondrial	ERAL1	1511
18.3452	19.2558	19.6186	19.0074	19.9171	19.654	20.0951	20.6627	+	LFQ intensity LSD1_LFQ intensity NLS	6	6	6	23.4	23.4	23.4	43.796	0	20.307	61600000	20	1.61379	0.0448365	1.02547	0.437671	E9PC15;Q53H12;E9PG39	E9PC15;Q53H12;E9PG39	Acylglycerol kinase, mitochondrial	AGK	727
16.9953	19.1482	18.4496	18.7955	18.9742	19.0129	19.1994	20.8423	+	LFQ intensity LSD1_LFQ intensity NLS	3	3	3	13.7	13.7	13.7	52.337	0	6.0558	47800000	13	0.902895	0.0448429	1.16005	0.437584	Q9UJW0;E5RGG1;H9KVE0	Q9UJW0	Dynactin subunit 4	DCTN4	4208
22.1363	21.9637	21.3045	21.9243	22.9024	22.58	22.6096	23.1253	+	LFQ intensity LSD1_LFQ intensity NLS	38	37	37	29.8	29.3	29.3	242.96	0	323.31	943000000	163	2.31969	0.0448849	0.972143	0.43728	Q5JSZ5;Q5JSZ9;H0Y412;Q5JT00	Q5JSZ5	Protein PRRC2B	PRRC2B	2820
23.9134	24.2463	25.2785	25.3811	25.3031	26.3477	25.2891	26.1776	+	LFQ intensity LSD1_LFQ intensity NLS	8	8	7	88.7	88.7	73.9	11.665	0	113.25	2590000000	110	1.22651	0.0454093	1.07456	0.436289	P05387;H0YDD8	P05387;H0YDD8	60S acidic ribosomal protein P2	RPLP2	1665
22.4066	22.9024	22.4849	22.7327	23.1503	23.417	23.8858	23.9495	+	LFQ intensity LSD1_LFQ intensity NLS	24	24	24	31.2	31.2	31.2	133.06	0	131	886000000	221	2.31716	0.0456071	0.968967	0.435941	C9J2Y9;P30876;C9J4M6;C9JMN3;C9JZW8	C9J2Y9;P30876;C9J4M6	DNA-directed RNA polymerase;DNA-directed RNA polymerase II subunit RPB2	POLR2B	521	+
20.9882	20.8727	21.1886	21.5069	22.2448	22.1825	21.8614	22.0359	+	LFQ intensity LSD1_LFQ intensity NLS	7	7	7	22.6	22.6	22.6	52.743	0	29.154	324000000	52	2.93056	0.0457016	0.94208	0.43554	O15269	O15269	Serine palmitoyltransferase 1	SPTLC1	1360
19.1231	19.1898	17.8585	18.7015	20.4375	20.0292	19.2787	19.3321	+	LFQ intensity LSD1_LFQ intensity NLS	3	3	3	28.7	28.7	28.7	14.379	0	12.317	55300000	21	1.34981	0.0458279	1.05112	0.43516	Q5VV87;Q5VV89;O14880	Q5VV87;Q5VV89;O14880	Microsomal glutathione S-transferase 3	MGST3	1329
28.141	28.3704	28.1795	28.3704	29.0137	29.1866	29.2979	29.189	+	LFQ intensity LSD1_LFQ intensity NLS	27	27	1	73.9	73.9	2.7	49.83	0	323.31	41700000000	1085	4.40295	0.0460319	0.906481	0.434805	P68371	P68371	Tubulin beta-4B chain	TUBB4B	2360
23.5285	23.4923	23.895	23.8385	24.6264	24.3031	24.8764	24.7024	+	LFQ intensity LSD1_LFQ intensity NLS	25	25	23	37	37	34.6	107.14	0	142.63	1490000000	163	2.98349	0.0459911	0.938529	0.434776	P53618;E9PP73;E9PP63	P53618	Coatomer subunit beta	COPB1	2199
22.417	22.2707	22.5961	22.4375	23.239	23.2317	23.3511	23.5285	+	LFQ intensity LSD1_LFQ intensity NLS	24	24	24	27.8	27.8	27.8	150.25	0	215.74	694000000	180	4.09605	0.0468152	0.907271	0.432845	O95163;F5H2T0;H0YDF3	O95163;F5H2T0	Elongator complex protein 1	IKBKAP	1559
20.3962	20.3211	19.2066	19.3365	21.391	20.3211	20.5356	21.1703	+	LFQ intensity LSD1_LFQ intensity NLS	27	16	16	12.3	8.9	8.9	326.02	0	70.26	205000000	51	1.37177	0.0470786	1.03943	0.43222	Q3L8U1;H3BTW3;A0A087WU44;J3KRH9;J3KSW5;H3BSP3	Q3L8U1;H3BTW3	Chromodomain-helicase-DNA-binding protein 9	CHD9	2774
20.3321	20.3321	20.3752	20.1946	21.5638	21.1269	20.9316	21.3045	+	LFQ intensity LSD1_LFQ intensity NLS	6	6	4	13.5	13.5	10.4	76.034	0	69.914	218000000	38	3.23328	0.0472007	0.923213	0.431408	C9JR56;Q9UPW6	C9JR56;Q9UPW6	DNA-binding protein SATB;DNA-binding protein SATB2	SATB2	563
24.7389	24.867	24.5045	24.3376	25.772	25.4769	25.3307	25.5696	+	LFQ intensity LSD1_LFQ intensity NLS	59	59	1	47.1	47.1	1	207.62	0	323.31	3370000000	531	3.07709	0.0477118	0.925341	0.430364	J3KN01	J3KN01		MLLT4	1160
19.8636	18.7995	20.2302	19.5951	21.0426	20.654	20.654	20.1825	+	LFQ intensity LSD1_LFQ intensity NLS	6	6	6	18.8	18.8	18.8	50.146	0	14.763	131000000	30	1.55313	0.0477368	1.01118	0.430132	Q9UKT4	Q9UKT4	F-box only protein 5	FBXO5	4227
17.351	19.4148	18.3287	18.9216	19.9601	19.6783	19.3211	19.3056	+	LFQ intensity LSD1_LFQ intensity NLS	6	4	4	13.1	10.4	10.4	85.956	0	7.863	50600000	7	1.1879	0.0477443	1.06226	0.429927	Q01826;A0A087WW22;A0A087WW75;C9JP21	Q01826	DNA-binding protein SATB1	SATB1	2411
20.0156	19.7955	17.589	20.002	20.6453	20.0426	20.3857	20.8034	+	LFQ intensity LSD1_LFQ intensity NLS	8	8	3	9.9	9.9	3.7	138.75	0	55.102	98600000	33	0.930062	0.0486329	1.11873	0.428249	P20020;E7ERY9;Q16720;H0Y7S3;Q01814;F8W1V5	P20020;E7ERY9	Plasma membrane calcium-transporting ATPase 1;Calcium-transporting ATPase	ATP2B1	1829
21.6757	21.8191	21.823	21.1581	23.2961	22.2905	22.5754	22.2332	+	LFQ intensity LSD1_LFQ intensity NLS	10	10	10	30.8	30.8	30.8	61.945	0	40.026	374000000	69	1.82409	0.0488272	0.97984	0.427779	Q5TKA1;C9J5J4;H7C4T7;H0Y322;B1B047	Q5TKA1;C9J5J4;H7C4T7;H0Y322	Protein lin-9 homolog	LIN9	2889
17.9882	20.0821	20.1079	20.002	19.654	20.1825	21.2933	21.6627	+	LFQ intensity LSD1_LFQ intensity NLS	15	15	15	17.5	17.5	17.5	144.75	0	111.44	170000000	54	0.822318	0.0490288	1.15313	0.427098	Q13045;J3KS54;K7EQZ7;K7EP37;K7EP27;J3QLR6;J3QQQ2;J3KS39;J3QQU5	Q13045	Protein flightless-1 homolog	FLII	2512
19.025	19.2673	18.0633	19.5638	19.9459	20.002	20.0691	19.8712	+	LFQ intensity LSD1_LFQ intensity NLS	16	16	16	21.8	21.8	21.8	132.37	0	78.924	189000000	64	1.63628	0.0491314	0.992195	0.426295	Q14865	Q14865	AT-rich interactive domain-containing protein 5B	ARID5B	2641
22.9334	22.7895	22.8191	23.2492	23.417	23.632	24.1015	24.4984	+	LFQ intensity LSD1_LFQ intensity NLS	7	7	7	14.4	14.4	14.4	53.944	0	69.663	1300000000	141	1.97259	0.0493774	0.964427	0.425999	P53985;Q5T8R5;Q5T8R3	P53985;Q5T8R5	Monocarboxylate transporter 1	SLC16A1	2203
18.0382	17.5665	18.822	17.549	17.77	20.4874	18.7039	19.5204	+	LFQ intensity LSD1_LFQ intensity NLS	3	3	3	13.8	13.8	13.8	42.514	0	6.0268	50300000	9	0.871112	0.0496944	1.12648	0.42484	F5GZK9;Q8IZD4	F5GZK9;Q8IZD4	mRNA-decapping enzyme 1B	DCP1B	838

## Sheet: HDAC1 S0=1
LFQ intensity HDAC1-02	LFQ intensity HDAC1-03	LFQ intensity HDAC1-04	LFQ intensity HDAC1-01	LFQ intensity NLS-01	LFQ intensity NLS-01r	LFQ intensity NLS-02	LFQ intensity NLS-03	Student's T-test Significant LFQ intensity HDAC1_LFQ intensity NLS	Student's T-test significant	Peptides	Razor + unique peptides	Unique peptides	Sequence coverage [%]	Unique + razor sequence coverage [%]	Unique sequence coverage [%]	Mol. weight [kDa]	Q-value	Score	Intensity	MS/MS count	-Log Student's T-test p-value LFQ intensity HDAC1_LFQ intensity NLS	Student's T-test q-value LFQ intensity HDAC1_LFQ intensity NLS	Student's T-test Difference LFQ intensity HDAC1_LFQ intensity NLS	Student's T-test Test statistic LFQ intensity HDAC1_LFQ intensity NLS	Protein IDs	Majority protein IDs	Protein names	Gene names	id	Known interactors
30.6629	30.6022	30.7292	30.4629	23.8576	23.9134	24.1095	23.7895	+	LFQ intensity HDAC1_LFQ intensity NLS	22	22	18	51	51	41.7	55.102	0	225.29	18500000000	704	9.42519	0	6.69682	6.14843	Q13547;Q5TEE2;E5RK19	Q13547;Q5TEE2	Histone deacetylase 1	HDAC1	2562	+
26.228	26.0084	26.1075	26.4754	19.0951	18.7764	18.8238	19.8515	+	LFQ intensity HDAC1_LFQ intensity NLS	98	81	80	45.6	39.5	38.4	276.54	0	323.31	6710000000	908	6.70702	0	7.06815	5.57403	O00763;F8W8T8;H0YGH5;A0A087WUA1	O00763	Acetyl-CoA carboxylase 2;Biotin carboxylase	ACACB	1306
25.2096	26.346	25.7364	25.5255	18.7624	17.4103	18.7814	17.9667	+	LFQ intensity HDAC1_LFQ intensity NLS	32	23	23	52.3	40.4	40.4	71.027	0	99.345	2600000000	215	5.7551	0	7.47417	5.30042	P17066;P48741	P17066	Heat shock 70 kDa protein 6	HSPA6	1796
25.452	25.1055	24.4923	25.2354	16.1317	15.768	18.5878	15.5951	+	LFQ intensity HDAC1_LFQ intensity NLS	27	27	27	61.1	61.1	61.1	59.403	0	305.86	2350000000	310	4.63923	0	8.55062	4.94892	E9PDR0;P05166;C9JQS9;E7EX59;E7ETT1;E7ETT4;E7EUY3;E9PEC3;F8WBI9;E7ENC1;H7C5C9;C9JVW9;C9JAW3;C9JVY9	E9PDR0;P05166;C9JQS9;E7EX59;E7ETT1;E7ETT4;E7EUY3;E9PEC3;F8WBI9	Propionyl-CoA carboxylase beta chain, mitochondrial	PCCB	735
30.8309	30.7129	30.7292	30.9259	26.1871	26.0275	25.7208	26.038	+	LFQ intensity HDAC1_LFQ intensity NLS	42	42	42	64.8	64.8	64.8	80.472	0	323.31	134000000000	2346	8.02416	0	4.80642	4.33131	Q96RQ3;E9PHF7;E9PG35;F5GYT8;G5E9X5;F8WDI3	Q96RQ3;E9PHF7;E9PG35;F5GYT8;G5E9X5	Methylcrotonoyl-CoA carboxylase subunit alpha, mitochondrial	MCCC1	3610
23.4425	23.3239	23.5983	23.1976	17.5878	18.6382	17.6168	17.977	+	LFQ intensity HDAC1_LFQ intensity NLS	37	37	37	51.2	51.2	51.2	115.27	0	323.31	1330000000	253	6.11942	0	5.43561	4.31796	O75362;Q9BZ31;A2A326	O75362	Zinc finger protein 217	ZNF217	1483	+
31.2759	30.995	30.6798	31.2365	26.1719	26.2714	26.1795	25.8834	+	LFQ intensity HDAC1_LFQ intensity NLS	54	54	54	69.6	69.6	69.6	80.058	0	323.31	135000000000	2151	7.08997	0	4.92021	4.23814	P05165;H0Y5U0;Q5JTW6;Q5JVH2;H0Y4B9;H0Y798	P05165	Propionyl-CoA carboxylase alpha chain, mitochondrial	PCCA	1662
32.2422	32.1239	32.1239	32.5132	27.9595	27.9869	27.5682	27.9146	+	LFQ intensity HDAC1_LFQ intensity NLS	43	43	43	78.6	78.6	78.6	59.62	0	323.31	74400000000	1270	7.27256	0	4.39352	3.87458	P50990;H7C4C8;H7C2U0	P50990	T-complex protein 1 subunit theta	CCT8	2147	+
24.945	25.1642	25.0854	25.3376	20.3645	20.4576	20.5731	21.0886	+	LFQ intensity HDAC1_LFQ intensity NLS	130	2	2	63.7	0.6	0.6	278.22	0	13.369	990000000	63	6.55952	0	4.51208	3.82003	Q60FE5;A0A087WWY3	Q60FE5;A0A087WWY3		FLNA	2915
31.0283	30.7453	30.7373	31.0479	26.6458	26.6181	26.8385	26.509	+	LFQ intensity HDAC1_LFQ intensity NLS	65	65	65	66.3	66.3	66.3	129.63	0	323.31	153000000000	2250	7.6937	0	4.23688	3.81766	P11498;E9PRE7;E9PS68	P11498	Pyruvate carboxylase, mitochondrial	PC	1738
23.2036	22.7695	22.8327	23.5983	17.5574	17.6022	18.8111	17.058	+	LFQ intensity HDAC1_LFQ intensity NLS	9	2	2	62.8	8.5	8.5	10.807	1	-2	273000000	16	4.84791	0	5.34387	3.76684	A0A087X0W4;A0A087WVR6	A0A087X0W4		ACACA	145
23.7695	23.5285	23.5045	24.002	18.6168	18.1307	19.3123	19.4046	+	LFQ intensity HDAC1_LFQ intensity NLS	18	18	18	25.6	25.6	25.6	109.7	0	62.163	276000000	79	5.24823	0	4.83501	3.65326	Q96QT6;C9J9G2;K7EPF7;K7ERZ4;K7EJN7;K7ENU0;K7EJ43	Q96QT6;C9J9G2	PHD finger protein 12	PHF12	3603	+
23.0658	23.2229	23.9043	23.7286	19.0638	19.0184	19.2302	19.113	+	LFQ intensity HDAC1_LFQ intensity NLS	16	16	16	16.6	16.6	16.6	162.21	0	123.34	193000000	59	6.1601	0	4.37403	3.62983	Q9ULD9;A0A0C4DGB8;B3KPE6;A2RRB2	Q9ULD9;A0A0C4DGB8;B3KPE6	Zinc finger protein 608	ZNF608	4237
24.141	24.5285	24.7129	24.6865	20.1581	19.7488	20.5915	18.8269	+	LFQ intensity HDAC1_LFQ intensity NLS	40	40	1	24.2	24.2	0.9	296.67	0	323.31	795000000	203	4.63916	0	4.68592	3.34984	F5H212;A0A0D9SFF3;C9JLG1	F5H212		HIVEP1	849
21.8614	21.5685	21.6757	21.6843	17.2042	18.0156	18.0745	17.4004	+	LFQ intensity HDAC1_LFQ intensity NLS	4	4	4	16.8	16.8	16.8	38.136	0	231.31	58200000	11	5.68706	0	4.02379	3.28011	Q9H7L9	Q9H7L9	Sin3 histone deacetylase corepressor complex component SDS3	SUDS3	3905	+
31.8042	31.9983	32.3303	32.2164	27.4785	27.6181	27.6251	28.6697	+	LFQ intensity HDAC1_LFQ intensity NLS	169	169	145	74.3	74.3	64.8	265.55	0	323.31	354000000000	5379	5.10796	0	4.23951	3.26185	Q13085;Q59FY4;A0A0C4DGT1;A0A087WWN5;A0A087X2F8;A0A087WYS8	Q13085	Acetyl-CoA carboxylase 1;Biotin carboxylase	ACACA	2514
24.1642	23.7995	23.895	24.5105	19.1605	19.8965	19.8832	20.4375	+	LFQ intensity HDAC1_LFQ intensity NLS	39	39	39	42.6	42.6	42.6	124.29	0	201.56	1540000000	251	5.05508	0	4.24789	3.251	Q92618;A0A087WUJ4;F5H2K2	Q92618;A0A087WUJ4	Zinc finger protein 516	ZNF516	3408	+
28.2262	27.8916	27.5898	28.4433	24.1642	24.019	24.3511	24.4298	+	LFQ intensity HDAC1_LFQ intensity NLS	53	53	53	43.4	43.4	43.4	145.17	0	323.31	4520000000	495	5.7448	0	3.79667	3.13992	Q96ST3;H3BP90;H3BNZ3;H3BT34;H3BQ76;H3BQ88;H3BNA0;H3BQL7;H3BMA2	Q96ST3	Paired amphipathic helix protein Sin3a	SIN3A	3628	+
23.3511	22.4273	22.2448	23.2258	18.1218	15.0617	18.4933	16.8238	+	LFQ intensity HDAC1_LFQ intensity NLS	22	16	16	53.7	43.8	43.8	55.581	0	192.37	1040000000	138	3.34028	0	5.68712	3.11815	Q9P2K3;B4DV59;E9PQE5;H0YF22;E9PR63;H0YDR8;H0YDD7;E9PPC5	Q9P2K3;B4DV59	REST corepressor 3	RCOR3	4139	+
26.0127	25.7695	25.8788	26.391	19.0506	20.1703	21.5961	22.1079	+	LFQ intensity HDAC1_LFQ intensity NLS	35	35	35	35	35	35	133.06	0	323.31	2080000000	303	3.52657	0	5.28176	3.09372	O75182;M0QYC5;M0R271	O75182;M0QYC5	Paired amphipathic helix protein Sin3b	SIN3B	1478	+
23.2492	22.9316	22.714	23.3376	19.5638	18.5686	19.2673	18.0187	+	LFQ intensity HDAC1_LFQ intensity NLS	16	16	16	21.8	21.8	21.8	132.37	0	78.924	189000000	64	4.51001	0	4.20347	3.05328	Q14865	Q14865	AT-rich interactive domain-containing protein 5B	ARID5B	2641	+
23.4676	23.6431	24.1719	23.7895	19.4894	18.9402	19.8802	20.4676	+	LFQ intensity HDAC1_LFQ intensity NLS	25	25	25	32.7	32.7	32.7	102.28	0	108.86	662000000	150	4.57978	0	4.0737	3.00632	A0A087X211;Q8TCG1;F8WF26;F8WAX6	A0A087X211;Q8TCG1	Protein CIP2A	KIAA1524	161
21.4273	21.2006	21.7265	21.6276	17.805	18.3514	17.2241	17.4529	+	LFQ intensity HDAC1_LFQ intensity NLS	7	7	7	36.3	36.3	36.3	32.179	0	49.469	196000000	38	5.07197	0	3.78712	2.97832	P57052	P57052	Splicing regulator RBM11	RBM11	2242
22.7077	22.1976	22.5213	23.211	18.5761	17.8729	19.1599	18.9837	+	LFQ intensity HDAC1_LFQ intensity NLS	15	15	15	30.5	30.5	30.5	78.893	0	41.661	331000000	60	4.53536	0	4.01127	2.95848	Q8IUZ0;H0YKE9;H0YNV5;H0YM43;H0YMZ6;H0YMT2;A0A0B4J283;H0YNI5;H0YLZ6;H0YKI5;H0YLQ8;H0YKQ0	Q8IUZ0	Leucine-rich repeat-containing protein 49	LRRC49	3145
25.4676	25.3943	25.1719	25.9134	21.8191	21.7348	22.3294	21.3101	+	LFQ intensity HDAC1_LFQ intensity NLS	16	16	16	23.9	23.9	23.9	111.28	0	78.298	775000000	90	5.10955	0	3.68846	2.92595	H7BXF5;Q9H0E3;C9J683;C9JTJ5	H7BXF5;Q9H0E3	Histone deacetylase complex subunit SAP130	SAP130	1099	+
24.8576	24.5638	24.4862	24.8288	19.8207	20.895	21.5638	20.8034	+	LFQ intensity HDAC1_LFQ intensity NLS	16	16	15	29.8	29.8	28.4	79.109	0	158.34	592000000	90	4.36878	0	3.91336	2.85411	Q969R5;H0Y5M2;H7C228	Q969R5	Lethal(3)malignant brain tumor-like protein 2	L3MBTL2	3457	+
22.5093	22.7307	22.8461	22.6409	19.719	19.4476	19.0532	19.4874	+	LFQ intensity HDAC1_LFQ intensity NLS	7	7	7	34.1	34.1	34.1	37.353	0	36.672	377000000	83	6.11246	0	3.25493	2.81711	Q9H6J7;E9PI12;E9PI28;H0YDJ0	Q9H6J7;E9PI12	UPF0705 protein C11orf49	C11orf49	3889
22.4066	22.3619	22.2792	22.3129	18.4736	19.4496	18.265	18.9344	+	LFQ intensity HDAC1_LFQ intensity NLS	46	46	46	31.3	31.3	31.3	221.36	0	323.31	905000000	205	4.97988	0	3.55949	2.81453	A0A087WTW5;Q9UKL3;A0A096LP21	A0A087WTW5;Q9UKL3	CASP8-associated protein 2	CASP8AP2	34
27.2262	27.2354	27.4154	27.1507	24.0526	24.0443	23.867	24.4298	+	LFQ intensity HDAC1_LFQ intensity NLS	36	36	34	43.1	43.1	41.9	118.13	0	323.31	8130000000	564	6.474	0	3.15849	2.79245	Q9ULH7;I3L2S3;B0QY84;I3L2A0;Q8IZQ8	Q9ULH7	MKL/myocardin-like protein 2	MKL2	4240
30.8385	30.2759	30.4727	30.7692	27.189	27.6998	27.2714	27.1795	+	LFQ intensity HDAC1_LFQ intensity NLS	133	133	133	50.5	50.5	50.5	267.29	0	323.31	79500000000	2899	5.73414	0	3.25414	2.7577	P12270;Q5SWX9	P12270	Nucleoprotein TPR	TPR	1749
22.0691	22.155	22.343	22.2792	19.1713	19.0052	18.8085	17.8944	+	LFQ intensity HDAC1_LFQ intensity NLS	7	7	7	1.3	1.3	1.3	847.96	0	13.886	156000000	11	4.68774	0	3.49171	2.70359	F8W9J4;Q03001;E7ERU0;E9PHM6;F6QMI7;E9PEB9;Q6P0N6;E7ETB9	F8W9J4;Q03001;E7ERU0;E9PHM6;F6QMI7;E9PEB9	Dystonin	DST	928
25.1214	24.8811	25.1095	24.9361	20.9098	21.0951	22.2961	21.6627	+	LFQ intensity HDAC1_LFQ intensity NLS	40	40	40	51.5	51.5	51.5	136.16	0	323.31	3440000000	362	4.48737	0	3.52108	2.67068	Q14687;H0Y613;H7C3B5;C9JLW9	Q14687;H0Y613	Genetic suppressor element 1	GSE1	2628	+
27.3239	26.7771	26.7129	27.2803	23.9134	23.7594	24.1015	23.7695	+	LFQ intensity HDAC1_LFQ intensity NLS	27	25	21	43.6	40.1	37.7	75.022	0	243.42	2840000000	326	5.63648	0	3.13759	2.65827	O94776	O94776	Metastasis-associated protein MTA2	MTA2	1540	+
30.7373	31.2077	31.3672	31.0927	27.8858	27.7518	28.1842	28.2308	+	LFQ intensity HDAC1_LFQ intensity NLS	132	132	4	64.1	64.1	1.6	280.74	0	323.31	76100000000	2687	5.64379	0	3.08811	2.62379	P21333;Q5HY54;F8WE98;H0Y5F3;H7C2E7	P21333;Q5HY54	Filamin-A	FLNA	1839
27.3578	27.1015	26.9428	27.5389	24.141	23.7895	24.4676	24.141	+	LFQ intensity HDAC1_LFQ intensity NLS	66	66	54	57.5	57.5	42.2	154.91	0	323.31	9720000000	931	5.45022	0	3.10045	2.60184	Q9UBW7	Q9UBW7	Zinc finger MYM-type protein 2	ZMYM2	4165	+
24.3376	23.976	24.239	24.239	20.9459	21.0493	21.4676	21.4874	+	LFQ intensity HDAC1_LFQ intensity NLS	21	21	21	33	33	33	118.56	0	133.53	722000000	125	5.79055	0	2.96033	2.55156	Q63HK5	Q63HK5	Teashirt homolog 3	TSHZ3	2916
22.44	21.2477	22.2006	21.5777	19.0088	18.5046	17.4061	17.8661	+	LFQ intensity HDAC1_LFQ intensity NLS	25	3	3	26.7	3.3	3.3	127.14	0	5.1567	152000000	31	3.75535	0	3.67009	2.53671	H3BU53	H3BU53		MGA	1096
25.654	25.217	24.918	25.7619	20.9812	22.714	22.1238	20.9098	+	LFQ intensity HDAC1_LFQ intensity NLS	52	52	40	73.5	73.5	61.5	74.853	0	323.31	62200000000	709	3.58713	0	3.70555	2.49739	Q96BD5;E9PLU5;E9PR02;E9PS51;E9PLV4;H0YEK2;H0YCI1;E9PNW9;E9PNN4	Q96BD5	PHD finger protein 21A	PHF21A	3472	+
21.3321	21.9459	21.7715	21.4775	18.9559	17.9809	18.0211	18.7733	+	LFQ intensity HDAC1_LFQ intensity NLS	12	12	12	40.4	40.4	40.4	35.812	0	177.51	659000000	70	4.49882	0	3.19896	2.48372	Q9P0W2;B5MDG7;K7EJR8;C9J8X5;C9JQA7;C9K049;F8WES5	Q9P0W2;B5MDG7;K7EJR8	SWI/SNF-related matrix-associated actin-dependent regulator of chromatin subfamily E member 1-related	HMG20B	4123	+
20.8499	20.6276	21.3156	21.0951	18.1554	18.3202	17.6273	17.8794	+	LFQ intensity HDAC1_LFQ intensity NLS	5	5	5	5.4	5.4	5.4	172.42	0	8.465	34100000	8	5.07167	0	2.97649	2.45289	Q9P2R6;H7BYW9;B1AKN3;K7EIE3;H0Y975	Q9P2R6;H7BYW9	Arginine-glutamic acid dipeptide repeats protein	RERE	4143	+
21.8876	21.1457	21.9707	21.7876	19.1009	18.4111	18.7492	18.3515	+	LFQ intensity HDAC1_LFQ intensity NLS	3	3	3	3.4	3.4	3.4	137.33	0	17.134	134000000	4	4.67606	0	3.04472	2.42535	Q9Y4H2	Q9Y4H2	Insulin receptor substrate 2	IRS2	4348
27.217	26.8385	26.9202	27.4073	24.2678	24.0526	24.5045	24.3376	+	LFQ intensity HDAC1_LFQ intensity NLS	24	22	22	51.3	47.7	47.7	65.26	0	259.07	3550000000	319	5.62824	0	2.80513	2.41462	Q8WXI9	Q8WXI9	Transcriptional repressor p66-beta	GATAD2B	3382	+
28.0608	27.6865	27.6458	28.1015	24.8481	24.9933	25.417	24.6703	+	LFQ intensity HDAC1_LFQ intensity NLS	93	93	71	40.3	40.3	31.2	331.83	0	323.31	5520000000	866	5.16792	0	2.89147	2.41026	Q8IWI9;H3BTF4;H3BP52;H3BTN2	Q8IWI9	MAX gene-associated protein	MGA	3158	+
22.5189	23.7286	23.8481	23.0918	19.8861	19.3101	20.5069	20.2185	+	LFQ intensity HDAC1_LFQ intensity NLS	31	31	31	24.2	24.2	24.2	232.76	0	139.38	624000000	111	3.77194	0	3.31646	2.36724	Q96BY7;H7C3T2;Q2TAZ0	Q96BY7	Autophagy-related protein 2 homolog B	ATG2B	3481
22.6029	23.2463	23.5404	23.2821	20.4676	19.6869	20.343	18.9714	+	LFQ intensity HDAC1_LFQ intensity NLS	23	23	16	9.1	9.1	6.6	394.46	0	125.42	287000000	75	3.77962	0	3.30067	2.36131	P46939;H0Y337	P46939	Utrophin	UTRN	2080
24.0359	24.1719	22.0724	23.1765	18.7731	20.8651	18.963	18.8995	+	LFQ intensity HDAC1_LFQ intensity NLS	34	34	34	41.4	41.4	41.4	110.04	0	204.47	1000000000	149	2.91705	0	3.98897	2.3542	Q9P0K7;D6RE17;D6RB25;D6RBW6;D6RB27;D6R9G4;D6RBY4;D6REL2;D6R9G6;D6RF74	Q9P0K7	Ankycorbin	RAI14	4118
20.4874	20.417	20.9388	20.7223	18.1784	17.9724	17.8118	17.8267	+	LFQ intensity HDAC1_LFQ intensity NLS	8	8	8	37.2	37.2	37.2	31.274	0	22.129	78600000	29	5.7858	0	2.69404	2.35069	Q6ZTW0	Q6ZTW0	Tubulin polyglutamylase complex subunit 1	TPGS1	3023
22.4551	21.654	21.823	22.2214	18.5878	19.6024	19.1206	18.7039	+	LFQ intensity HDAC1_LFQ intensity NLS	9	9	9	48.4	48.4	48.4	31.844	0	44.13	139000000	51	4.31699	0	3.03471	2.34547	O75461;F8WC40;F8WEZ5;Q2Z196;Q2Z197	O75461	Transcription factor E2F6	E2F6	1498	+
22.3857	22.7796	22.48	22.1519	17.3562	18.4211	19.586	19.7439	+	LFQ intensity HDAC1_LFQ intensity NLS	9	9	9	37.5	37.5	37.5	37.629	0	73.769	136000000	33	3.16809	0	3.6725	2.33503	Q5PSV4;H0YHD0	Q5PSV4;H0YHD0	Breast cancer metastasis-suppressor 1-like protein	BRMS1L	2838	+
25.5667	25.3443	25.2244	25.5433	22.8557	22.4425	22.9153	22.8614	+	LFQ intensity HDAC1_LFQ intensity NLS	39	38	38	35.3	35.3	35.3	152.6	0	323.31	2580000000	422	5.91164	0	2.65099	2.33186	A6NHB5;Q14202;A6NHN7;A6NL54;A6NC58	A6NHB5;Q14202;A6NHN7	Zinc finger MYM-type protein 3	ZMYM3	361	+
25.7364	25.8312	25.9672	25.8528	23.074	22.7471	23.4551	23.3101	+	LFQ intensity HDAC1_LFQ intensity NLS	37	37	37	33.9	33.9	33.9	151.19	0	309.77	1430000000	339	5.53134	0	2.70031	2.32447	O15014;E7ERY8	O15014	Zinc finger protein 609	ZNF609	1340	+
23.1734	23.5983	23.2678	23.2961	20.5823	20.2066	21.0821	20.1825	+	LFQ intensity HDAC1_LFQ intensity NLS	18	18	18	44.7	44.7	44.7	69.666	0	146.95	487000000	100	4.74995	0	2.82054	2.29363	Q14145;K7EJ49;K7EJD8;K7ESE0;K7EQX2;K7EPZ3	Q14145	Kelch-like ECH-associated protein 1	KEAP1	2591
23.7895	23.8764	24.317	23.8385	19.7089	19.7504	21.3752	21.4015	+	LFQ intensity HDAC1_LFQ intensity NLS	46	46	46	30.8	30.8	30.8	256.86	0	323.31	1040000000	206	3.33005	0	3.39636	2.27307	A0A087WW06;Q96AY4;B0QYP4;B0QYP5	A0A087WW06;Q96AY4	Tetratricopeptide repeat protein 28	TTC28	70
24.0359	24.019	24.4923	23.7895	18.0691	22.6386	19.3343	18.9171	+	LFQ intensity HDAC1_LFQ intensity NLS	35	35	28	43	43	37.9	128.47	0	199.04	1280000000	182	2.28916	0	4.34442	2.15898	X6RLX0;Q8IUD2;G8JLD3;X6RM00;K7EPP6;K7EPD6;K7EP25;K7EIZ7;K7EKH8	X6RLX0;Q8IUD2;G8JLD3;X6RM00	ELKS/Rab6-interacting/CAST family member 1	ERC1	3143
24.5869	23.867	24.1642	24.4362	19.3879	22.3752	20.9098	19.185	+	LFQ intensity HDAC1_LFQ intensity NLS	53	53	47	85.4	85.4	77.1	53.327	0	323.31	84800000000	1276	2.60751	0	3.79916	2.15756	J3KN32;Q9UKL0;H0YNY4	J3KN32;Q9UKL0	REST corepressor 1	RCOR1	1163	+
20.4476	21.7389	22.0918	21.9985	19.0213	18.3349	18.5447	17.8172	+	LFQ intensity HDAC1_LFQ intensity NLS	5	5	5	19.9	19.9	19.9	29.793	0	4.5595	225000000	10	3.33595	0	3.13967	2.15685	Q0PNE2;H7BZM9;C9JLH5;C9JA82;C9J2D6;C9J9N8;C9JEX8;C9IYN7;F8WE64	Q0PNE2;H7BZM9	Elongator complex protein 6	ELP6	2474
25.2678	25.2133	25.275	25.4953	22.5938	22.5731	22.8614	23.2492	+	LFQ intensity HDAC1_LFQ intensity NLS	34	34	34	52.9	52.9	52.9	94.474	0	318.92	1620000000	363	5.20797	0	2.49351	2.13214	Q5T5X7	Q5T5X7	BEN domain-containing protein 3	BEND3	2866	+
23.9495	24.2678	24.217	24.2678	21.7955	21.7995	20.9882	21.8499	+	LFQ intensity HDAC1_LFQ intensity NLS	29	29	29	44.8	44.8	44.8	108.62	0	133.87	1180000000	195	4.61436	0	2.56727	2.10314	Q7Z4H7;Q5VY60;Q5SYF9	Q7Z4H7;Q5VY60	HAUS augmin-like complex subunit 6	HAUS6	3071
20.5069	20.002	20.2419	20.6006	16.9822	18.1633	17.8653	17.5491	+	LFQ intensity HDAC1_LFQ intensity NLS	10	9	9	25.4	23.9	23.9	58.011	0	44.557	168000000	36	4.08863	0	2.69787	2.09703	Q8IZ40	Q8IZ40	REST corepressor 2	RCOR2	3192	+
21.1642	21.1642	20.8727	21.5961	18.7256	18.0834	19.0662	17.624	+	LFQ intensity HDAC1_LFQ intensity NLS	21	21	21	11.5	11.5	11.5	425.23	0	47.143	167000000	47	3.67516	0	2.8245	2.08378	A0A087WV20;A0A087WTU9;A0A087WZY3;Q8TCU4;H7C1D9	A0A087WV20;A0A087WTU9;A0A087WZY3;Q8TCU4	Alstrom syndrome protein 1	ALMS1	31
24.558	24.417	24.8433	24.3239	22.2155	22.0459	21.895	22.3936	+	LFQ intensity HDAC1_LFQ intensity NLS	20	20	20	21.6	21.6	21.6	150.07	0	220.43	1470000000	266	5.31589	0	2.39802	2.07399	Q6Y7W6;I1E4Y6;E7ESB6;C9JHW1;C9JH18;F8WCD5;C9JPV7;C9JXQ0;C9J0V6;C9JHT0;C9JRZ2;C9JW88;C9JH78;C9IYH5;C9J7G1;B8ZZD2	Q6Y7W6;I1E4Y6;E7ESB6;C9JHW1	PERQ amino acid-rich with GYF domain-containing protein 2	GIGYF2	3015
24.6865	25.0567	25.3511	25.0359	22.5638	22.8538	22.5498	22.6276	+	LFQ intensity HDAC1_LFQ intensity NLS	27	27	27	39.6	39.6	39.6	107.17	0	193.77	1660000000	257	5.35208	0	2.38381	2.06727	Q8TD19;G3V459;G3V2Z5;G3V5V0;REV__Q5SQT3;REV__Q9P0M6	Q8TD19	Serine/threonine-protein kinase Nek9	NEK9	3324
26.2996	26.558	26.4614	26.452	24.1642	24.1174	23.8858	24.3975	+	LFQ intensity HDAC1_LFQ intensity NLS	18	18	18	61.2	61.2	61.2	33.83	0	266.33	5960000000	357	5.93578	0	2.30151	2.05914	P46108;I3L297	P46108	Adapter molecule crk	CRK	2069
23.7389	22.3239	23.178	23.48	20.7307	20.6186	20.2419	20.0821	+	LFQ intensity HDAC1_LFQ intensity NLS	6	6	6	26.8	26.8	26.8	32.844	0	68.006	212000000	48	3.70258	0	2.76187	2.05549	O95983;K7EIE8;A0A0A0MTS6;A0A087WT34;A0A087X1H1	O95983;K7EIE8;A0A0A0MTS6	Methyl-CpG-binding domain protein 3	MBD3	1611	+
24.0608	24.5404	24.9584	24.3712	21.7634	21.8152	21.8461	22.3988	+	LFQ intensity HDAC1_LFQ intensity NLS	31	31	31	34	34	34	120.75	0	266.53	1160000000	278	4.37608	0	2.52679	2.03949	Q9C0B7	Q9C0B7	Transport and Golgi organization protein 6 homolog	TANGO6	3804
20.8113	21.928	21.6409	21.1703	18.4696	19.4004	18.4496	18.2466	+	LFQ intensity HDAC1_LFQ intensity NLS	5	5	5	41	41	41	22.782	0	37.284	136000000	42	3.59377	0	2.74607	2.02287	P04792;F8WE04;C9J3N8	P04792;F8WE04	Heat shock protein beta-1	HSPB1	1652
21.1642	22.2933	22.0459	21.6757	17.0494	17.7603	18.0963	20.265	+	LFQ intensity HDAC1_LFQ intensity NLS	9	9	9	20	20	20	71.863	0	27.569	146000000	21	2.50732	0	3.50204	2.01858	Q15025;A0A0A0MRZ4;E7EMV7;H0YC17;E7EW15;E7EWG2;E7EW68	Q15025;A0A0A0MRZ4;E7EMV7	TNFAIP3-interacting protein 1	TNIP1	2657
23.214	23.4551	23.5285	23.4923	20.5451	20.2989	20.7796	21.6364	+	LFQ intensity HDAC1_LFQ intensity NLS	15	15	13	35.1	35.1	32.4	75.186	0	111.55	628000000	101	3.89722	0	2.60747	2.00664	O14640;A0A087WWA7;P54792	O14640;A0A087WWA7;P54792	Segment polarity protein dishevelled homolog DVL-1;Putative segment polarity protein dishevelled homolog DVL1P1	DVL1;DVL1P1	1314
23.0951	23.1916	23.3239	23.417	20.6186	19.724	21.1642	20.9316	+	LFQ intensity HDAC1_LFQ intensity NLS	18	18	18	21	21	21	141.52	0	90.603	453000000	136	3.74581	0	2.64728	2.00014	Q9UHF7;E5RFF3;E5RJ97;H0YC29;H0YAV4;C9J6L7;E7EVN4;F8W8T0	Q9UHF7;E5RFF3;E5RJ97;H0YC29	Zinc finger transcription factor Trps1	TRPS1	4189	+
25.1527	23.8191	23.5165	25.0401	21.502	21.5213	21.895	20.8876	+	LFQ intensity HDAC1_LFQ intensity NLS	44	44	44	40.6	40.6	40.6	181.42	0	323.31	2170000000	377	3.11938	0	2.93059	1.99792	Q92766;C9JU34;A0A087X055;C9JPJ6;C9JE09	Q92766;C9JU34	Ras-responsive element-binding protein 1	RREB1	3418	+
24.5404	24.7234	24.6096	24.7645	21.7265	22.3073	22.3156	22.6907	+	LFQ intensity HDAC1_LFQ intensity NLS	16	16	16	45.2	45.2	45.2	46.676	0	121.65	1000000000	168	4.6224	0	2.39943	1.99024	Q9NZC7;A0A087WZG5;F5H3R5	Q9NZC7	WW domain-containing oxidoreductase	WWOX	4105
21.9061	20.7553	21.8839	21.1079	19.2405	18.821	18.371	18.5892	+	LFQ intensity HDAC1_LFQ intensity NLS	5	5	5	23.1	23.1	23.1	39.047	0	16.853	63200000	21	3.6202	0	2.65788	1.98019	Q9BYE7	Q9BYE7	Polycomb group RING finger protein 6	PCGF6	3779	+
22.3073	22.6051	23.0156	22.4451	18.1869	18.1357	20.4576	20.3962	+	LFQ intensity HDAC1_LFQ intensity NLS	20	20	19	33.8	33.8	33.1	125.61	0	232.9	647000000	121	2.57113	0	3.29915	1.97321	Q13625;H7C5L8	Q13625	Apoptosis-stimulating of p53 protein 2	TP53BP2	2570
20.654	21.4972	21.5638	20.5261	19.0642	18.0637	17.9936	18.3493	+	LFQ intensity HDAC1_LFQ intensity NLS	6	4	4	11.4	8.8	8.8	60.812	0	6.9753	66300000	14	3.487	0	2.69258	1.97029	A0A0C4DGH3;Q9Y6R0;M0QXQ4;M0QYC2;M0R0Q4;M0QZV7	A0A0C4DGH3;Q9Y6R0;M0QXQ4;M0QYC2	Numb-like protein	NUMBL	299
22.928	23.7695	23.895	23.4676	20.6364	21.6364	20.5915	20.7634	+	LFQ intensity HDAC1_LFQ intensity NLS	17	17	17	24.7	24.7	24.7	121.98	0	66.088	640000000	104	3.68574	0	2.60808	1.9657	Q9UQL6;K7EJL6;K7EJL4;K7EJZ7;K7ES01;C9J0X4;C9J481;B7Z3P7;B5MCF1;Q9UKV0;P56524	Q9UQL6	Histone deacetylase 5	HDAC5	4281	+
22.6822	22.7915	22.8365	22.4476	19.1104	20.0156	20.7634	20.2419	+	LFQ intensity HDAC1_LFQ intensity NLS	8	8	8	21.6	21.6	21.6	61.436	0	54.119	85200000	27	3.52603	0	2.6566	1.95942	Q7Z3K6;A8MQD4;A0A087WZA4;A0A087WXW2;Q8N344	Q7Z3K6	Mesoderm induction early response protein 3	MIER3	3062	+
26.4938	26.4282	26.3695	26.506	24.2317	24.2961	24.5165	24.3778	+	LFQ intensity HDAC1_LFQ intensity NLS	28	28	27	46.3	46.3	45.4	104.66	0	323.31	2740000000	350	7.06726	0	2.09384	1.95852	Q9H4I2;H0Y6F5;H0YNY7;A0A0A0MSU5;F6UQN6;F6XGA7;F6UBH9;A0A0A0MST6	Q9H4I2;H0Y6F5	Zinc fingers and homeoboxes protein 3	ZHX3	3875
21.9916	22.0156	22.0459	21.4972	19.8515	19.8438	18.4802	18.3321	+	LFQ intensity HDAC1_LFQ intensity NLS	16	16	16	37.3	37.3	37.3	69.239	0	112.96	363000000	57	3.13286	0.00026943	2.76067	1.92088	Q96LB3;E5RIF0;E5RH29;E5RGX6;E5RJK3	Q96LB3	Intraflagellar transport protein 74 homolog	IFT74	3578
22.9388	23.391	23.3511	22.9548	21.1395	21.0088	20.3538	20.8727	+	LFQ intensity HDAC1_LFQ intensity NLS	20	20	15	36.8	36.8	26	71.407	0	86.302	397000000	75	4.46281	0.000265306	2.31524	1.91114	G3V5R9;G3V3H3;G5E9S8;G3V2E7;F8W6L3;E7EVH7;Q07866;H0YG16;H0YJU9;H0YJL0;H0YJT3;G3V2P7;H7C4M1;E9PQ02;A8MX29;H0YJK1;H0YGB8;K7EL76;Q6P597	G3V5R9;G3V3H3;G5E9S8;G3V2E7;F8W6L3;E7EVH7;Q07866	Kinesin light chain 1	KLC1	970
24.6703	24.2821	24.4551	24.7895	22.5869	22.0983	22.1301	22.4923	+	LFQ intensity HDAC1_LFQ intensity NLS	24	24	24	49.7	49.7	49.7	61.332	0	293.81	2010000000	324	4.93844	0.000262626	2.22238	1.90275	Q9HCC0;D6RD67;D6RDF7;D6R9R1	Q9HCC0;D6RD67;D6RDF7	Methylcrotonoyl-CoA carboxylase beta chain, mitochondrial	MCCC2	3948
22.3184	22.5754	22.6971	22.5615	19.1891	21.3376	18.7214	18.3186	+	LFQ intensity HDAC1_LFQ intensity NLS	6	6	6	6.9	6.9	6.9	167.35	0	15.105	357000000	12	2.45366	0.000256158	3.14644	1.87597	Q08378;A0A087WV43	Q08378	Golgin subfamily A member 3	GOLGA3	2463
26.0955	26.2133	26.4738	26.329	24.1253	23.8576	23.9043	24.5225	+	LFQ intensity HDAC1_LFQ intensity NLS	47	47	47	43.2	43.2	43.2	168.59	0	323.31	3390000000	507	4.82595	0.000252427	2.17547	1.85633	Q8TEQ6	Q8TEQ6	Gem-associated protein 5	GEMIN5	3338
27.217	26.48	25.9955	27.0711	24.3239	24.5344	24.2096	24.0854	+	LFQ intensity HDAC1_LFQ intensity NLS	32	32	28	58.6	58.6	52.8	79.372	0	270.64	3240000000	447	3.71823	0.00025	2.40258	1.8524	E7ESY4;Q13330;H0Y4T7;F8VSM3;F8W9Y9;F8VPC5;H0YIV8;H7C3F3;C9JJM0	E7ESY4;Q13330;H0Y4T7	Metastasis-associated protein MTA1	MTA1	694	+
27.4551	27.1214	27.4154	27.6458	25.1871	24.8997	25.5344	25.3811	+	LFQ intensity HDAC1_LFQ intensity NLS	33	33	33	58.8	58.8	58.8	74.484	0	323.31	12500000000	736	4.76785	0.00024186	2.15885	1.83797	Q86T24	Q86T24	Transcriptional regulator Kaiso	ZBTB33	3090
24.019	23.9225	23.8481	24.4425	21.654	21.8538	22.2448	20.9316	+	LFQ intensity HDAC1_LFQ intensity NLS	36	36	36	26.5	26.5	26.5	210.63	0	282.08	980000000	234	3.63305	0.000238532	2.38699	1.82811	Q96Q89;A0A0A0MSJ5	Q96Q89	Kinesin-like protein KIF20B	KIF20B	3600
22.5846	21.5069	19.9039	21.8073	19.4273	18.2182	18.1694	17.8572	+	LFQ intensity HDAC1_LFQ intensity NLS	40	1	1	44.9	1.5	1.5	131.69	0	28.055	193000000	24	2.42711	0.000236364	3.03265	1.82575	Q9ULU4;A0A0A0MTK7	Q9ULU4;A0A0A0MTK7	Protein kinase C-binding protein 1	ZMYND8	4246	+
20.0821	20.1457	20.2764	20.3962	17.5712	17.3595	18.1342	18.5434	+	LFQ intensity HDAC1_LFQ intensity NLS	11	11	11	6	6	6	330.63	0	19.393	63500000	24	3.79656	0.000234234	2.32303	1.81766	Q68DQ2	Q68DQ2	Very large A-kinase anchor protein	CRYBG3	2925
19.6627	20.3645	20.1332	20.4576	18.1946	17.2512	18.265	16.9431	+	LFQ intensity HDAC1_LFQ intensity NLS	26	26	25	43.6	43.6	42.6	98.14	0	258.25	720000000	150	3.23417	0.000232143	2.49107	1.80824	Q9UHJ3;C9IY64	Q9UHJ3	Scm-like with four MBT domains protein 1	SFMBT1	4191
22.6298	22.6562	22.7553	22.4676	20.6364	20.3321	20.7715	20.7471	+	LFQ intensity HDAC1_LFQ intensity NLS	13	13	13	27.5	27.5	27.5	76.059	0	142.79	387000000	80	5.59223	0.00022807	2.00543	1.79496	D3YTB5;P51617;H7C224;H7C2I6;H7C3C1;F8WAB6;H7C3G8;H7C1F0;F6U4U2;P51955	D3YTB5;P51617;H7C224	Interleukin-1 receptor-associated kinase 1	IRAK1	602
22.7856	22.8557	23.6865	22.2905	18.1555	20.4476	20.6096	20.5261	+	LFQ intensity HDAC1_LFQ intensity NLS	10	9	9	17.3	16.3	16.3	98.38	0	23.945	277000000	51	2.38439	0.000225108	2.96983	1.78827	E7ESP9;P07197;E7EMV2	E7ESP9;P07197;E7EMV2	Neurofilament medium polypeptide	NEFM	693
20.6714	21.0756	21.0951	19.9882	19.0403	17.7485	17.5207	18.381	+	LFQ intensity HDAC1_LFQ intensity NLS	6	6	6	11.5	11.5	11.5	98.655	0	59.612	123000000	36	2.98244	0.000219409	2.53495	1.77429	P42566;B1AUU8	P42566;B1AUU8	Epidermal growth factor receptor substrate 15	EPS15	2043
20.1825	20.6096	20.4972	20.6186	17.722	18.4114	17.4051	18.8701	+	LFQ intensity HDAC1_LFQ intensity NLS	8	8	8	14	14	14	134.75	0	21.705	102000000	22	3.32369	0.000217573	2.37485	1.76375	Q9P1Y5	Q9P1Y5	Calmodulin-regulated spectrin-associated protein 3	CAMSAP3	4124
22.1143	22.6779	22.2736	22.7389	18.41	18.5248	21.6627	18.3349	+	LFQ intensity HDAC1_LFQ intensity NLS	6	6	6	21.8	21.8	21.8	45.581	0	10.199	263000000	17	2.09801	0.000216667	3.21803	1.76326	Q96BU1;E9PSA0;E9PIY5;E9PMK1;E9PL86;E9PIZ7	Q96BU1;E9PSA0	S100P-binding protein	S100PBP	3479
23.0918	23.0342	23.2185	23.0037	20.7876	19.9214	21.1332	21.2821	+	LFQ intensity HDAC1_LFQ intensity NLS	26	24	24	15	14	14	293.51	0	69.185	518000000	142	3.52981	0.000215768	2.30598	1.7625	Q9UMN6	Q9UMN6	Histone-lysine N-methyltransferase 2B	KMT2B	4252
23.6649	23.8093	23.9043	23.8576	18.4947	21.2821	21.4825	21.6928	+	LFQ intensity HDAC1_LFQ intensity NLS	22	22	22	30.5	30.5	30.5	97.34	0	81.246	697000000	90	2.18285	0.000213115	3.07099	1.75061	Q92667;I3L0W0;I3L2A2;I3L2N7;I3L0K6;I3L364;I3L3K1;I3NI36	Q92667	A-kinase anchor protein 1, mitochondrial	AKAP1	3414
20.0426	20.1825	20.6186	20.265	17.9229	17.9212	18.1636	18.6515	+	LFQ intensity HDAC1_LFQ intensity NLS	8	8	8	12.1	12.1	12.1	99.289	0	26.616	74700000	18	4.23718	0.000210526	2.11239	1.74399	Q15276;I3L456	Q15276	Rab GTPase-binding effector protein 1	RABEP1	2678
22.8307	23.5165	23.4551	22.8191	21.4526	18.8776	21.0625	20.0951	+	LFQ intensity HDAC1_LFQ intensity NLS	11	9	9	28.5	25.8	25.8	78.054	0	24.523	426000000	63	2.43284	0.000208835	2.78343	1.73415	Q92997;F8WCF1;C9K0P9	Q92997	Segment polarity protein dishevelled homolog DVL-3	DVL3	3441
23.48	23.6096	23.6757	23.3511	21.7995	21.0559	21.2185	21.7307	+	LFQ intensity HDAC1_LFQ intensity NLS	34	34	0	16.9	16.9	0	319.1	0	178.22	673000000	145	4.35326	0.000208	2.078	1.73412	P50851;H0YA17	P50851	Lipopolysaccharide-responsive and beige-like anchor protein	LRBA	2146
21.5777	22.3645	21.7471	21.5915	19.3508	19.1327	20.1206	19.7725	+	LFQ intensity HDAC1_LFQ intensity NLS	12	12	12	14.7	14.7	14.7	142.83	0	37.293	137000000	34	3.6106	0.000205534	2.22608	1.72861	Q96PY6;H0Y8M6	Q96PY6	Serine/threonine-protein kinase Nek1	NEK1	3598
27.5315	27.4938	27.0296	27.4938	25.1055	25.5344	25.5492	24.3645	+	LFQ intensity HDAC1_LFQ intensity NLS	171	171	171	56.4	56.4	56.4	629.09	0	323.31	7420000000	1258	3.5168	0.000204724	2.24875	1.72668	Q09666;E9PJZ0;E9PKR9;E9PJC6;E9PLK4;E9PQE3	Q09666	Neuroblast differentiation-associated protein AHNAK	AHNAK	2473
25.4041	25.3943	25.6757	25.6237	22.7512	23.4551	23.3239	23.9225	+	LFQ intensity HDAC1_LFQ intensity NLS	57	43	34	38.8	32.7	25.9	226.59	0	275.35	2380000000	382	3.86086	0.000203922	2.16124	1.72635	Q12873;H7C3H7;H7C2H0;K7EPV1;I3L1I4	Q12873	Chromodomain-helicase-DNA-binding protein 3	CHD3	2491	+
20.2066	20.6186	20.8727	20.8727	18.9489	18.7806	17.7714	17.764	+	LFQ intensity HDAC1_LFQ intensity NLS	9	9	9	9.8	9.8	9.8	136.92	0	20.408	88000000	28	3.21717	0.00020155	2.32642	1.7166	Q9NSV4	Q9NSV4	Protein diaphanous homolog 3	DIAPH3	4021
26.1565	26.4298	26.4892	26.0935	24.3307	24.019	24.2607	24.6209	+	LFQ intensity HDAC1_LFQ intensity NLS	34	33	15	52.3	51.2	29.7	102.29	0	321.6	3120000000	459	4.80614	0.0002	1.98443	1.71357	A0A0A0MRA8;Q9Y2J2;J3QS55;J3KT37;J3KS70;J3QKY2;J3KRD1;J3QKK4;J3QR33;J3QRQ6;J3QLU5;J3QS83	A0A0A0MRA8;Q9Y2J2	Band 4.1-like protein 3;Band 4.1-like protein 3, N-terminally processed	EPB41L3	194
22.1363	21.9601	22.4751	22.2764	20.1946	20.3752	20.3321	20.3321	+	LFQ intensity HDAC1_LFQ intensity NLS	6	6	4	13.5	13.5	10.4	76.034	0	69.914	218000000	38	5.48978	0.000198473	1.90349	1.70587	C9JR56;Q9UPW6	C9JR56;Q9UPW6	DNA-binding protein SATB;DNA-binding protein SATB2	SATB2	563	+
24.3975	24.9584	25.1946	24.4105	22.2764	22.5638	22.5309	23.0559	+	LFQ intensity HDAC1_LFQ intensity NLS	13	12	12	28.4	26.8	26.8	78.947	0	62.857	1680000000	156	3.77173	0.00019697	2.13351	1.69598	O14641;I3L2W9;I3L2N2;I3L0M7;I3L0Z8	O14641;I3L2W9;I3L2N2;I3L0M7	Segment polarity protein dishevelled homolog DVL-2	DVL2	1315
22.4651	22.9441	23.181	22.3266	20.2419	18.5758	20.1581	21.2302	+	LFQ intensity HDAC1_LFQ intensity NLS	24	5	5	49.9	8.7	8.7	57.718	0	143.77	247000000	46	2.4249	0.000195489	2.67772	1.69017	B2RB02	B2RB02		EPB41L3	422
29.3536	29.1263	29.3578	29.5389	27.1604	27.0914	27.4938	27.726	+	LFQ intensity HDAC1_LFQ intensity NLS	103	103	82	56.9	56.9	47.6	217.1	0	323.31	31300000000	1675	4.6039	0.00019403	1.97627	1.68826	F5GWX5;A0A0C4DGG9;Q14839;F5H6N4;F6T542	F5GWX5;A0A0C4DGG9;Q14839	Chromodomain-helicase-DNA-binding protein 4	CHD4	297	+
21.0951	21.0088	21.6051	21.1395	19.1624	18.1801	17.0978	19.7406	+	LFQ intensity HDAC1_LFQ intensity NLS	14	14	14	10	10	10	254.41	0	27.048	166000000	25	2.37743	0.00018705	2.66689	1.6717	O75165;H0YA63;H0Y8Q2	O75165	DnaJ homolog subfamily C member 13	DNAJC13	1476
21.5731	20.4972	20.5261	20.7553	18.6394	19.1905	17.4157	18.4914	+	LFQ intensity HDAC1_LFQ intensity NLS	12	4	4	23.9	10.9	10.9	58.726	0	21.969	32000000	13	2.76147	0.000368794	2.4037	1.65927	E7EQY4;E7EV10;Q9BTC8;E9PCS8;D6W5A2;E9PF88;H0YIT0	E7EQY4;E7EV10;Q9BTC8;E9PCS8;D6W5A2	Metastasis-associated protein MTA3	MTA3	683	+
25.2714	25.7103	25.902	25.3031	23.7995	23.3376	23.6096	23.6096	+	LFQ intensity HDAC1_LFQ intensity NLS	25	25	25	48.5	48.5	48.5	71.45	0	173.52	2140000000	315	4.42157	0.000366197	1.95763	1.65653	Q9Y5K6	Q9Y5K6	CD2-associated protein	CD2AP	4364
24.9847	24.2463	24.3031	25.0813	22.5213	22.3672	23.0309	22.2564	+	LFQ intensity HDAC1_LFQ intensity NLS	23	23	23	35	35	35	111.92	0	69.839	436000000	100	3.55813	0.000358621	2.1099	1.64989	A0A0A0MSU2;Q6PJG2;H7C1L3;C9JYU7	A0A0A0MSU2;Q6PJG2	ELM2 and SANT domain-containing protein 1	ELMSAN1	234	+
23.0789	23.2477	22.2535	23.0105	20.2877	19.9742	21.3376	20.9098	+	LFQ intensity HDAC1_LFQ intensity NLS	28	28	28	38.4	38.4	38.4	137.53	0	112.2	826000000	164	3.02166	0.000357388	2.27034	1.64828	Q92610;H0YM74	Q92610;H0YM74	Zinc finger protein 592	ZNF592	3404	+
22.1395	22.3017	22.44	21.9777	19.8354	19.6347	20.3645	20.7056	+	LFQ intensity HDAC1_LFQ intensity NLS	13	13	12	13.2	13.2	12.4	185.19	0	51.253	242000000	70	3.65134	0.000354949	2.07969	1.64488	E9PCH4;Q8TEU7;A0A0A6YYB7;A0A0A0MR23;D6RE77;B7Z7Y1;A0A0A6YYJ1	E9PCH4;Q8TEU7;A0A0A6YYB7;A0A0A0MR23;D6RE77;B7Z7Y1	Rap guanine nucleotide exchange factor 6	RAPGEF6	731
21.895	22.6907	22.9829	22.0526	19.376	17.5682	20.002	21.0951	+	LFQ intensity HDAC1_LFQ intensity NLS	7	7	7	17.7	17.7	17.7	46.674	0	11.09	176000000	21	1.99665	0.000347826	2.89502	1.62437	Q9ULX3;H3BUR4	Q9ULX3	RNA-binding protein NOB1	NOB1	4250
22.9882	22.6971	22.3538	23.0459	20.417	21.1703	20.7634	20.8113	+	LFQ intensity HDAC1_LFQ intensity NLS	12	12	12	17.7	17.7	17.7	142.75	0	144.28	180000000	44	3.96515	0.000346667	1.98073	1.62194	P29374;C9J1W3;H7C485	P29374;C9J1W3	AT-rich interactive domain-containing protein 4A	ARID4A	1918	+
22.4751	21.9847	22.2155	22.3752	19.8697	20.0156	20.3321	20.8191	+	LFQ intensity HDAC1_LFQ intensity NLS	17	17	17	36.5	36.5	36.5	78.413	0	101.48	253000000	108	3.83741	0.000345515	2.00348	1.62122	Q9Y253;Q5JTF2	Q9Y253	DNA polymerase eta	POLH	4291
22.1825	22.4701	22.3699	22.0426	20.5545	20.5165	20.3962	20.4676	+	LFQ intensity HDAC1_LFQ intensity NLS	11	11	11	14.4	14.4	14.4	168.9	0	236.11	333000000	68	5.66331	0.000344371	1.78255	1.61848	Q7Z3T8;H0YAB1	Q7Z3T8	Zinc finger FYVE domain-containing protein 16	ZFYVE16	3063
23.7594	23.7895	23.8191	23.8191	21.6497	21.743	22.3936	21.8689	+	LFQ intensity HDAC1_LFQ intensity NLS	33	33	33	23.6	23.6	23.6	265.61	0	210.55	1120000000	199	4.53999	0.000343234	1.88297	1.61388	Q9HCK1;N0DVX5	Q9HCK1;N0DVX5	DBF4-type zinc finger-containing protein 2	ZDBF2	3954
22.4825	22.9951	22.8461	22.3619	20.2066	20.7471	20.4066	21.1886	+	LFQ intensity HDAC1_LFQ intensity NLS	23	23	23	13.5	13.5	13.5	294.36	0	47.454	463000000	70	3.62273	0.000342105	2.03414	1.61229	Q9UPU5	Q9UPU5	Ubiquitin carboxyl-terminal hydrolase 24	USP24	4273
29.7309	30.2869	30.4234	29.9117	28.1361	28.0453	28.0914	28.4707	+	LFQ intensity HDAC1_LFQ intensity NLS	120	120	120	59.6	59.6	59.6	273.42	0	323.31	50600000000	2319	4.26971	0.000334405	1.90232	1.60162	P49327;J3KTF0	P49327	Fatty acid synthase;[Acyl-carrier-protein] S-acetyltransferase;[Acyl-carrier-protein] S-malonyltransferase;3-oxoacyl-[acyl-carrier-protein] synthase;3-oxoacyl-[acyl-carrier-protein] reductase;3-hydroxyacyl-[acyl-carrier-protein] dehydratase;Enoyl-[acyl-carrier-protein] reductase;Oleoyl-[acyl-carrier-protein] hydrolase	FASN	2107
26.417	26.632	26.6998	26.4877	24.9803	24.8904	24.1642	24.5404	+	LFQ intensity HDAC1_LFQ intensity NLS	31	31	31	60.7	60.7	60.7	57.488	0	298.62	3020000000	355	4.169	0.000333333	1.91528	1.60022	P78371;F5GWF6;F8VQ14	P78371;F5GWF6;F8VQ14	T-complex protein 1 subunit beta	CCT2	2373	+
27.0914	26.5898	26.3511	27.189	24.7796	24.5696	25.2891	24.4425	+	LFQ intensity HDAC1_LFQ intensity NLS	27	27	25	55.1	55.1	51.8	68.062	0	299.8	2690000000	364	3.51641	0.00033121	2.03511	1.59782	Q86YP4;C9JMI3;C9JGN4;C9JHD7;C9JJK9;C9JVY3;V9GY85;H7C3H1;V9GYX5	Q86YP4	Transcriptional repressor p66-alpha	GATAD2A	3139	+
20.4676	20.1206	19.9316	20.5356	17.9682	18.767	18.4771	17.5388	+	LFQ intensity HDAC1_LFQ intensity NLS	42	2	0	49.4	2.2	0	121.25	0	3.8109	48400000	12	3.28803	0.000328076	2.0761	1.58779	A0A087WYS3	A0A087WYS3		ZMYND8	110
20.9098	21.2764	21.2302	20.7553	18.9714	18.9937	19.5878	19.0769	+	LFQ intensity HDAC1_LFQ intensity NLS	11	11	11	10.1	10.1	10.1	217.33	0	32.867	108000000	46	4.18998	0.000327044	1.88546	1.58153	Q5T5U3;A0A087WW76;E7ESW5;F8W9U9	Q5T5U3;A0A087WW76;E7ESW5;F8W9U9	Rho GTPase-activating protein 21	ARHGAP21	2865
26.5898	26.558	26.3861	26.7389	24.7077	24.558	25.1604	24.4298	+	LFQ intensity HDAC1_LFQ intensity NLS	57	57	57	58.4	58.4	58.4	150.78	0	323.31	6300000000	773	4.38158	0.000326019	1.85423	1.57813	Q9ULM3;H0Y6M6	Q9ULM3	YEATS domain-containing protein 2	YEATS2	4244
22.8113	22.8932	22.7935	23.0409	20.2419	21.0088	21.0359	21.4066	+	LFQ intensity HDAC1_LFQ intensity NLS	18	18	18	34.7	34.7	34.7	79.817	0	121.31	517000000	99	3.63489	0.000461059	1.96141	1.56785	Q96T51;H0YA47;J3KPP6;H0Y9Y8;H0YAC8	Q96T51	RUN and FYVE domain-containing protein 1	RUFY1	3634
23.1703	21.7056	21.417	23.3778	19.286	20.417	20.8034	18.3879	+	LFQ intensity HDAC1_LFQ intensity NLS	21	21	21	14.9	14.9	14.9	235.31	0	150.94	247000000	63	1.95865	0.000588957	2.69412	1.54594	Q8NFU7	Q8NFU7	Methylcytosine dioxygenase TET1	TET1	3292
22.9619	23.4551	23.2258	23.1886	21.7348	21.5685	21.1143	21.0292	+	LFQ intensity HDAC1_LFQ intensity NLS	20	20	19	28	28	27	118.08	0	86.02	495000000	117	4.04985	0.000583587	1.84618	1.53953	Q4VCS5;E7ERM3;A6NP16	Q4VCS5;E7ERM3;A6NP16	Angiomotin	AMOT	2791
20.8876	20.3857	20.2989	20.654	18.6554	19.2461	18.105	18.4304	+	LFQ intensity HDAC1_LFQ intensity NLS	4	2	2	27.8	13.4	13.4	10.886	0	3.969	87400000	19	3.39905	0.00058006	1.94735	1.52715	C9JLI6;H0YMV8;Q71UM5	C9JLI6;H0YMV8;Q71UM5	40S ribosomal protein S27;40S ribosomal protein S27-like	RPS27L	552
25.019	24.9134	24.4425	25.0691	21.3538	23.5983	22.6006	22.8385	+	LFQ intensity HDAC1_LFQ intensity NLS	6	6	6	52.9	52.9	52.9	8.2178	0	34.253	2210000000	116	2.45179	0.00057485	2.26322	1.52142	P63173;J3KT73;J3QL01;J3KSP2	P63173;J3KT73;J3QL01	60S ribosomal protein L38	RPL38	2348
24.7746	24.8764	24.6865	24.5522	23.2288	23.0054	23.0902	22.7935	+	LFQ intensity HDAC1_LFQ intensity NLS	32	32	17	31.7	31.7	19.1	164.19	0	289.55	1380000000	282	5.22823	0.000571429	1.69292	1.51947	P39880	P39880	Homeobox protein cut-like 1	CUX1	2014
26.2909	26.509	26.632	26.4378	24.8385	24.7796	24.4425	24.945	+	LFQ intensity HDAC1_LFQ intensity NLS	35	35	32	55.7	55.7	52.8	97.621	0	323.31	5450000000	507	4.93697	0.000569733	1.71602	1.51889	Q9UBF2;H3BS45;F5H1S1;Q92521	Q9UBF2	Coatomer subunit gamma-2	COPG2	4155
21.4775	22.2361	22.2244	21.5961	19.1336	18.2856	19.8921	20.7389	+	LFQ intensity HDAC1_LFQ intensity NLS	14	14	14	17.5	17.5	17.5	140.02	0	219.64	155000000	46	2.25561	0.000721893	2.37095	1.51827	Q8NDI1;C9K0H9;B5MC86;Q8N3D4;C9J268;C9IYU2;E9PSB0;H7BZ98;H0YDZ9;E9PIH6	Q8NDI1	EH domain-binding protein 1	EHBP1	3270
20.8423	20.3857	20.8346	20.1825	17.8541	17.8377	19.7553	17.3236	+	LFQ intensity HDAC1_LFQ intensity NLS	6	6	6	14.3	14.3	14.3	92.819	0	9.8431	105000000	20	2.2588	0.000719764	2.36862	1.51817	Q3KQU3;E9PLH3;C9JIR3;H0YF21	Q3KQU3	MAP7 domain-containing protein 1	MAP7D1	2773
23.1127	22.7512	23.2361	23.1095	21.5069	19.7273	20.9459	21.4066	+	LFQ intensity HDAC1_LFQ intensity NLS	43	43	43	23	23	23	308.57	0	270.39	961000000	211	2.65865	0.000715543	2.15567	1.51631	E7EMW7;O95071;E7ET84;E5RFK7;H0YBB4	E7EMW7;O95071	E3 ubiquitin-protein ligase UBR5	UBR5	664
19.3473	20.0292	20.0691	19.786	17.9793	17.6781	17.6363	18.4262	+	LFQ intensity HDAC1_LFQ intensity NLS	4	4	4	8.6	8.6	8.6	87.793	0	8.1669	27600000	11	3.57581	0.000709302	1.87792	1.50676	O75410;E5RFM9;H0YAY0;R4GMT7;E7EVI4;E7ET87;E5RJU4;B4E3H6;H0YBT8	O75410;E5RFM9;H0YAY0;R4GMT7;E7EVI4;E7ET87	Transforming acidic coiled-coil-containing protein 1	TACC1	1493
21.6886	21.2006	22.5451	21.9134	18.5439	20.417	19.6645	19.8222	+	LFQ intensity HDAC1_LFQ intensity NLS	11	11	11	14.7	14.7	14.7	122.37	0	29.952	276000000	43	2.44687	0.000705202	2.22503	1.50293	O43683	O43683	Mitotic checkpoint serine/threonine-protein kinase BUB1	BUB1	1406	+
22.3403	22.6276	22.6141	21.8614	20.8191	20.6886	20.1703	20.4273	+	LFQ intensity HDAC1_LFQ intensity NLS	14	14	14	23.2	23.2	23.2	102.4	0	31.696	155000000	56	3.68625	0.000691218	1.83451	1.4917	Q7Z2K8	Q7Z2K8	G protein-regulated inducer of neurite outgrowth 1	GPRIN1	3055
21.0559	21.1946	21.1519	18.4929	17.7433	18.4994	18.1624	17.2991	+	LFQ intensity HDAC1_LFQ intensity NLS	4	4	4	35.8	35.8	35.8	20.501	0	13.849	93300000	10	1.93771	0.000687324	2.5478	1.48973	J3KR35;Q8WUD4;C9JUN5	J3KR35;Q8WUD4	Coiled-coil domain-containing protein 12	CCDC12	1187
24.6264	23.9316	23.895	24.8433	22.5404	22.1111	22.8073	22.1206	+	LFQ intensity HDAC1_LFQ intensity NLS	10	10	10	20.9	20.9	20.9	66.481	0	51.569	444000000	75	3.21188	0.000685393	1.92923	1.48945	Q9Y232;C9JQG7	Q9Y232	Chromodomain Y-like protein	CDYL	4289	+
21.4923	22.3457	21.9951	21.7512	20.4972	20.1457	19.8742	19.2787	+	LFQ intensity HDAC1_LFQ intensity NLS	17	17	17	6.3	6.3	6.3	530.25	0	99.818	263000000	62	3.08438	0.000822222	1.94715	1.48081	Q9NR09	Q9NR09	Baculoviral IAP repeat-containing protein 6	BIRC6	3993
23.1916	23.7077	24.0105	23.0691	21.6276	21.1703	21.8385	21.8307	+	LFQ intensity HDAC1_LFQ intensity NLS	23	23	23	23.9	23.9	23.9	194	0	285.3	600000000	195	3.35273	0.000819945	1.87793	1.47797	Q9UPQ9;H0Y720	Q9UPQ9;H0Y720	Trinucleotide repeat-containing gene 6B protein	TNRC6B	4269
21.0756	20.7056	21.4874	21.2302	18.0613	20.6096	17.8654	18.1797	+	LFQ intensity HDAC1_LFQ intensity NLS	9	9	8	10.1	10.1	9.4	142.82	0	17.65	175000000	24	1.9786	0.00090566	2.44567	1.46699	P11274;A9UF01;H0Y554;I3L1U8	P11274	Breakpoint cluster region protein	BCR	1733
26.3712	26.6458	26.527	26.4346	24.9134	24.8142	25.0608	24.8481	+	LFQ intensity HDAC1_LFQ intensity NLS	93	93	93	51.3	51.3	51.3	265.39	0	323.31	6220000000	971	5.94191	0.000903226	1.58552	1.46686	Q8NG31;E9PPJ1;H0YCZ2;H0YEY7;H0YN41	Q8NG31;E9PPJ1;H0YCZ2	Protein CASC5	CASC5	3295
21.4726	22.2036	22.6843	22.5165	20.3857	19.3624	20.4375	20.5638	+	LFQ intensity HDAC1_LFQ intensity NLS	20	20	20	16.1	16.1	16.1	212.71	0	90.693	233000000	68	2.7234	0.000900804	2.0319	1.46617	R4GNB2;R4GN35;Q5VZ89;X6RAE7;X6R5W5;A0A0A0MRX3;R4GMN2	R4GNB2;R4GN35;Q5VZ89	DENN domain-containing protein 4C	DENND4C	4401
26.143	26.3578	26.3762	26.4282	24.7286	24.5926	24.7594	24.8717	+	LFQ intensity HDAC1_LFQ intensity NLS	52	52	52	53	53	53	134.32	0	323.31	4270000000	639	5.81402	0.000898396	1.58821	1.46357	Q96JH7	Q96JH7	Deubiquitinating protein VCIP135	VCPIP1	3561
21.8423	22.1363	21.8499	22.4298	18.5013	20.8113	20.7307	17.9461	+	LFQ intensity HDAC1_LFQ intensity NLS	11	11	11	38.3	38.3	38.3	40.836	0	31.513	295000000	51	1.8337	0.000896	2.56726	1.46101	A0A087WXC5;E7ESZ7;O95299;Q8N1B9;C9J6X0;H7C2W5;H7C1Y7;H7C2X4	A0A087WXC5;E7ESZ7;O95299	NADH dehydrogenase [ubiquinone] 1 alpha subcomplex subunit 10, mitochondrial	NDUFA10	90
20.9388	20.8727	21.0625	20.8727	18.8434	18.484	19.9742	18.5923	+	LFQ intensity HDAC1_LFQ intensity NLS	14	13	13	10.1	9.7	9.7	236.6	0	25.826	136000000	17	2.89654	0.00103191	1.96319	1.45975	Q86YA3;G3XAL8;I3L0G6	Q86YA3;G3XAL8	Protein ZGRF1	ZGRF1	3137
24.2535	24.317	24.4488	24.2244	22.6029	21.6928	22.9043	22.6714	+	LFQ intensity HDAC1_LFQ intensity NLS	34	34	34	38.6	38.6	38.6	154.29	0	323.31	1420000000	303	3.30633	0.00102375	1.84307	1.45022	Q14207;H0YET3;E9PKJ1	Q14207	Protein NPAT	NPAT	2605
26.7895	26.8264	26.7771	26.8385	25.0854	25.2714	25.4707	25.0233	+	LFQ intensity HDAC1_LFQ intensity NLS	77	77	77	42.5	42.5	42.5	251.11	0	323.31	8340000000	950	5.36522	0.00101042	1.59517	1.44761	Q5VUA4;U3KQ37	Q5VUA4	Zinc finger protein 318	ZNF318	2898
24.9134	25.0317	25.0567	24.8576	23.4425	23.1991	23.4425	23.5165	+	LFQ intensity HDAC1_LFQ intensity NLS	45	45	44	28	28	27.6	270.63	0	323.31	1460000000	304	5.8119	0.00100518	1.56468	1.44347	P46821;D6RA32;D6RA40;D6RCL2;D6RGJ3	P46821	Microtubule-associated protein 1B;MAP1B heavy chain;MAP1 light chain LC1	MAP1B	2078
22.58	23.0342	23.1734	23.0207	21.1457	20.8651	21.1395	21.6928	+	LFQ intensity HDAC1_LFQ intensity NLS	12	12	12	37.2	37.2	37.2	39.933	0	55.797	365000000	85	3.70963	0.00112532	1.74131	1.43196	Q96A49	Q96A49	Synapse-associated protein 1	SYAP1	3462
20.2764	19.9272	20.0156	20.3321	19.2123	17.6759	17.8845	17.9937	+	LFQ intensity HDAC1_LFQ intensity NLS	14	14	14	14.2	14.2	14.2	183.09	0	40.849	301000000	46	2.77985	0.00112245	1.94624	1.43079	Q8TDY2	Q8TDY2	RB1-inducible coiled-coil protein 1	RB1CC1	3331
21.714	21.7755	21.7223	21.5069	18.7121	20.3211	18.6523	20.4775	+	LFQ intensity HDAC1_LFQ intensity NLS	6	6	6	14.2	14.2	14.2	89.252	0	232.42	120000000	56	2.28092	0.00124557	2.13892	1.42558	Q32MZ4;C9JTC6	Q32MZ4	Leucine-rich repeat flightless-interacting protein 1	LRRFIP1	2769
19.8742	19.9601	20.5915	20.5731	17.8944	18.6023	18.3771	18.8384	+	LFQ intensity HDAC1_LFQ intensity NLS	11	11	11	8.6	8.6	8.6	195.91	0	32.865	77800000	19	3.21234	0.00124242	1.82166	1.42457	Q8IWJ2;B8ZZW2;A0A087WZR8;B8ZZA5;H7BYJ9	Q8IWJ2;B8ZZW2	GRIP and coiled-coil domain-containing protein 2	GCC2	3159
24.1253	24.4298	24.5225	24.3578	22.5892	22.9654	22.3645	22.9006	+	LFQ intensity HDAC1_LFQ intensity NLS	57	57	57	28	28	28	292.75	0	323.31	1180000000	283	4.26196	0.00123618	1.65394	1.42122	Q92616	Q92616	Translational activator GCN1	GCN1L1	3407
21.5915	21.4273	21.7223	21.4324	20.0513	17.6775	18.5813	20.4775	+	LFQ intensity HDAC1_LFQ intensity NLS	18	18	18	5.8	5.8	5.8	510.08	0	79.414	186000000	30	1.94078	0.00123308	2.34645	1.41948	O75592;H7C3U4;A0A0C4DGY7	O75592	E3 ubiquitin-protein ligase MYCBP2	MYCBP2	1508
23.2821	23.4676	23.4923	23.5404	21.68	21.5869	22.1363	21.9352	+	LFQ intensity HDAC1_LFQ intensity NLS	20	20	20	35.2	35.2	35.2	71.639	0	120.36	591000000	102	4.64382	0.00122388	1.61097	1.41703	A0MZ66	A0MZ66	Shootin-1	KIAA1598	337
26.217	26.7895	26.8973	26.3612	24.5926	24.391	24.9584	25.2463	+	LFQ intensity HDAC1_LFQ intensity NLS	34	34	2	42.4	42.4	2.1	97.016	0	323.31	4330000000	481	3.38635	0.00122084	1.7692	1.41385	P11171	P11171	Protein 4.1	EPB41	1729
22.7995	23.4041	23.1426	23.1031	21.654	21.1703	21.654	21.3805	+	LFQ intensity HDAC1_LFQ intensity NLS	25	25	25	27.7	27.7	27.7	181.79	0	228.78	496000000	129	4.15044	0.00120885	1.64758	1.40741	Q9C0C2;E9PKK0;E9PKE7	Q9C0C2	182 kDa tankyrase-1-binding protein	TNKS1BP1	3805
19.7389	20.6276	20.2302	19.7796	18.4597	18.9082	17.6653	17.5477	+	LFQ intensity HDAC1_LFQ intensity NLS	4	4	4	18.8	18.8	18.8	46.105	0	8.3423	106000000	30	2.62621	0.00132683	1.94882	1.40513	P32121;I3L412;Q68DZ5;K7ENA6;K7EL17	P32121;I3L412;Q68DZ5;K7ENA6	Beta-arrestin-2	ARRB2;DKFZp686L0365	1953
19.8727	20.1206	20.5261	19.8787	19.0763	18.2855	17.9376	17.3936	+	LFQ intensity HDAC1_LFQ intensity NLS	7	7	7	8.9	8.9	8.9	124.04	0	19.131	65900000	19	2.61456	0.00143468	1.92626	1.39129	Q01804;D6RI06	Q01804	OTU domain-containing protein 4	OTUD4	2410
21.1519	21.265	21.0559	21.1946	17.9413	20.8499	18.4373	18.1089	+	LFQ intensity HDAC1_LFQ intensity NLS	7	7	7	22.4	22.4	22.4	57.548	0	18.696	152000000	23	1.85184	0.00161124	2.33247	1.38746	P49257	P49257	Protein ERGIC-53	LMAN1	2105
21.1581	21.0493	20.7307	20.6276	19.3871	19.8757	17.8192	18.1102	+	LFQ intensity HDAC1_LFQ intensity NLS	7	7	7	33	33	33	36.966	0	39.264	204000000	36	2.19581	0.00160748	2.09337	1.38559	Q06609;E9PNT5;E9PJ30;Q9NZG9;E9PI54	Q06609;E9PNT5	DNA repair protein RAD51 homolog 1	RAD51	2453
24.3975	24.3844	24.4234	24.3443	23.0342	23.0575	22.6231	22.5731	+	LFQ intensity HDAC1_LFQ intensity NLS	17	17	17	36.3	36.3	36.3	59.366	0	143.17	692000000	164	4.68574	0.0016	1.56544	1.38437	Q99832;F8WAM2	Q99832	T-complex protein 1 subunit eta	CCT7	3665	+
25.5014	25.5463	25.2856	25.6348	24.1332	24.1253	23.7182	23.7182	+	LFQ intensity HDAC1_LFQ intensity NLS	28	28	28	58.6	58.6	58.6	59.67	0	117.08	1780000000	296	4.52051	0.00170507	1.5683	1.37575	P48643;B7ZAR1;E9PCA1;E7ENZ3;D6RIZ7;H0Y914	P48643;B7ZAR1;E9PCA1;E7ENZ3	T-complex protein 1 subunit epsilon	CCT5	2097	+
25.8504	26.1293	26.2426	26.0935	24.6264	24.0691	24.632	24.6264	+	LFQ intensity HDAC1_LFQ intensity NLS	18	18	18	65.3	65.3	65.3	33.777	0	142.67	5180000000	344	4.18614	0.00188128	1.59046	1.3683	P46109	P46109	Crk-like protein	CRKL	2070
21.9916	22.1332	22.3348	22.3645	20.5356	19.3538	20.9812	20.6006	+	LFQ intensity HDAC1_LFQ intensity NLS	8	8	8	32.5	32.5	32.5	46.587	0	25.043	206000000	45	2.63896	0.00224499	1.83824	1.34883	Q96EB1;G5E9D4	Q96EB1;G5E9D4	Elongator complex protein 4	ELP4	3506
20.6186	20.6714	21.0756	20.5356	17.3731	18.9327	19.647	18.9015	+	LFQ intensity HDAC1_LFQ intensity NLS	8	8	8	5	5	5	311.64	0	14.229	124000000	24	2.18453	0.00223009	2.01176	1.34685	P25054;E9PFT7;B7Z2B6;H3BNH8;R4GMU6	P25054;E9PFT7;B7Z2B6	Adenomatous polyposis coli protein	APC	1876
23.1765	23.181	23.1095	23.2535	21.6928	22.0559	21.2707	21.3045	+	LFQ intensity HDAC1_LFQ intensity NLS	21	21	21	24.2	24.2	24.2	119.16	0	88.968	428000000	91	3.84852	0.00222517	1.59912	1.34681	P52732	P52732	Kinesin-like protein KIF11	KIF11	2183
24.5696	24.7286	24.989	24.48	22.6822	22.8839	23.1285	23.5404	+	LFQ intensity HDAC1_LFQ intensity NLS	48	48	15	39.6	39.6	14.8	194.1	0	323.31	1690000000	359	3.55849	0.00220569	1.63308	1.34324	Q8IZH2;C9JCZ8;F8WDA0	Q8IZH2	5-3 exoribonuclease 1	XRN1	3196
24.5463	24.5926	24.604	24.7695	23.1871	22.5731	23.3239	23.1395	+	LFQ intensity HDAC1_LFQ intensity NLS	71	71	71	33.2	33.2	33.2	384.22	0	323.31	1570000000	326	4.00675	0.00220087	1.57222	1.34076	P51587	P51587	Breast cancer type 2 susceptibility protein	BRCA2	2164
22.0224	22.7327	22.4874	21.9985	20.6886	20.0951	20.7389	20.9672	+	LFQ intensity HDAC1_LFQ intensity NLS	9	9	9	23.1	23.1	23.1	64.232	0	63.616	251000000	87	3.20601	0.00219608	1.68782	1.34063	F5GZ78;P49023;F5H836;H0YIE4	F5GZ78;P49023	Paxillin	PXN	836
27.0084	27.1115	27.4707	27.1507	25.6703	25.3844	25.8552	25.7338	+	LFQ intensity HDAC1_LFQ intensity NLS	126	126	85	55.5	55.5	39.6	358.2	0	323.31	11800000000	1599	4.42886	0.00218655	1.5244	1.33588	P49792;F8WBP7	P49792	E3 SUMO-protein ligase RanBP2	RANBP2	2126
24.0526	23.4551	23.7492	23.9847	20.9672	22.2419	22.3348	22.3988	+	LFQ intensity HDAC1_LFQ intensity NLS	28	28	28	24.6	24.6	24.6	153.89	0	95.57	1010000000	178	2.59939	0.00218182	1.8247	1.33501	Q92878;E7ESD9;E7EN38;E9PM98;H7C0P8;C9JNH8	Q92878	DNA repair protein RAD50	RAD50	3425
23.5983	24.4862	24.2821	23.6209	22.0526	21.8423	22.5189	22.6627	+	LFQ intensity HDAC1_LFQ intensity NLS	21	21	21	69.6	69.6	69.6	61.594	0	134.81	911000000	186	2.93603	0.00216774	1.72771	1.33081	O95817;C9JFK9	O95817	BAG family molecular chaperone regulator 3	BAG3	1603
25.1871	25.5638	25.3778	25.4105	24.1174	23.7995	23.7695	23.9406	+	LFQ intensity HDAC1_LFQ intensity NLS	76	71	69	42.4	40.9	39.6	278.16	0	322.83	2300000000	559	4.95586	0.00227468	1.47808	1.33045	O75369;E7EN95;A0A0A0MT44;H7C5L4;A0A0C4DGA1	O75369;E7EN95	Filamin-B	FLNB	1486
26.8973	27.189	27.5536	26.9869	25.6513	25.5609	25.1055	25.8528	+	LFQ intensity HDAC1_LFQ intensity NLS	100	100	82	48.6	48.6	40.4	226.53	0	323.31	8680000000	1193	3.54027	0.00225532	1.61406	1.32856	P35579;Q5BKV1;B1AH99;E7ERA5	P35579	Myosin-9	MYH9	1982
23.3511	23.48	23.4923	23.5285	22.0054	21.8876	22.0054	22.2244	+	LFQ intensity HDAC1_LFQ intensity NLS	17	17	17	29.5	29.5	29.5	81.116	0	114.43	910000000	122	5.70266	0.00225053	1.43229	1.32593	Q5W0B1	Q5W0B1	RING finger protein 219	RNF219	2913
21.2821	21.5309	21.502	18.0601	18.3346	17.7032	17.7365	18.6509	+	LFQ intensity HDAC1_LFQ intensity NLS	6	2	2	78.9	28.1	28.1	12.717	0	10.413	183000000	24	1.52579	0.00223629	2.48746	1.32473	A0A087WYK6	A0A087WYK6		ACACA	106
19.5842	20.3101	19.9316	19.1581	18.1427	17.7052	18.1255	18.265	+	LFQ intensity HDAC1_LFQ intensity NLS	4	4	4	4.3	4.3	4.3	210.29	0	6.4829	64700000	16	3.07053	0.00223158	1.68638	1.32327	Q8NDV7;H7C269;H3BTQ1	Q8NDV7;H7C269;H3BTQ1	Trinucleotide repeat-containing gene 6A protein	TNRC6A	3273
23.3376	23.5045	23.5983	23.3239	22.1111	21.9847	21.3699	22.0493	+	LFQ intensity HDAC1_LFQ intensity NLS	20	20	20	30.4	30.4	30.4	107.89	0	157.05	613000000	147	3.83518	0.00235639	1.56234	1.3195	O60763;REV__R4GMN2;REV__Q5VZ89;REV__R4GNB2;REV__R4GN35	O60763	General vesicular transport factor p115	USO1	1450
22.5615	22.1519	23.0071	23.5522	21.4273	18.7909	20.9388	21.265	+	LFQ intensity HDAC1_LFQ intensity NLS	1	1	1	28	28	28	5.8668	0	14.476	459000000	28	1.7521	0.00234167	2.21268	1.31471	F8VSA6;E9PS38;S4R3E9;E9PL57;Q15843	F8VSA6;E9PS38;S4R3E9;E9PL57;Q15843	NEDD8	NEDD8;NEDD8-MDP1	777
23.6431	24.275	24.239	23.976	22.2678	22.0789	22.7573	22.6409	+	LFQ intensity HDAC1_LFQ intensity NLS	20	20	20	32.5	32.5	32.5	86.312	0	169.77	1230000000	183	3.5081	0.0023368	1.59701	1.31386	A0A087WTE7;C9JMY0;A0A087WUE4;Q96PV6;E7EWC7;B0VJY8;H7BZP5	A0A087WTE7;C9JMY0;A0A087WUE4;Q96PV6	Leukocyte receptor cluster member 8	LENG8	28
20.9098	21.1765	21.1079	21.3592	19.5514	19.8408	19.6505	19.7022	+	LFQ intensity HDAC1_LFQ intensity NLS	11	11	11	19	19	19	106.35	0	21.833	145000000	47	4.91752	0.00232712	1.4521	1.3074	Q8TE76	Q8TE76	MORC family CW-type zinc finger protein 4	MORC4	3332
19.4415	19.0559	19.528	20.2764	17.9276	18.1697	17.855	17.7253	+	LFQ intensity HDAC1_LFQ intensity NLS	5	5	5	9.1	9.1	9.1	95.991	0	9.6763	59800000	9	3.05145	0.00252675	1.65606	1.30222	Q9P2N6;F8WD76;M0R3B6;C9JF16;F8WEN2;F8WB58;C9J491;A0A075B6P7;C9J5A4	Q9P2N6;F8WD76;M0R3B6	KAT8 regulatory NSL complex subunit 3	KANSL3	4141
21.5731	20.3752	21.0821	21.002	19.5165	19.2535	19.5628	19.1053	+	LFQ intensity HDAC1_LFQ intensity NLS	7	7	7	40.7	40.7	40.7	47.687	0	31.211	188000000	43	3.06564	0.00257724	1.64856	1.29929	Q13501;E7EMC7;E9PFW8;D6RBF1;C9J6J8;C9JRJ8;E3W990	Q13501;E7EMC7	Sequestosome-1	SQSTM1	2555
20.654	20.8191	21.2125	20.8191	17.8602	18.3973	20	19.4496	+	LFQ intensity HDAC1_LFQ intensity NLS	8	8	8	15	15	15	108.2	0	19.742	127000000	33	2.0933	0.00257201	1.9494	1.29874	Q9NRA8;B1AKL4;B0QYZ7;B1AKL5;B1AKL6	Q9NRA8;B1AKL4;B0QYZ7	Eukaryotic translation initiation factor 4E transporter	EIF4ENIF1	4000
23.7077	23.6649	23.9933	23.654	22.2764	22.5045	22.2905	22.2302	+	LFQ intensity HDAC1_LFQ intensity NLS	16	16	16	33.5	33.5	33.5	83.541	0	146.83	788000000	150	5.113	0.0025668	1.42959	1.2986	Q99567;J3KMX1;I3L245;I3L4K7;I3L2W3	Q99567;J3KMX1	Nuclear pore complex protein Nup88	NUP88	3648
22.1079	23.0476	23.1441	22.6584	19.9054	21.3752	21.3857	20.9243	+	LFQ intensity HDAC1_LFQ intensity NLS	19	19	19	12.6	12.6	12.6	276.9	0	90.483	438000000	73	2.33387	0.00255645	1.84185	1.29717	Q12923	Q12923	Tyrosine-protein phosphatase non-receptor type 13	PTPN13	2498
20.1825	20.4972	20.9812	20.3211	18.0531	19.7323	18.8517	16.6378	+	LFQ intensity HDAC1_LFQ intensity NLS	3	3	3	3.5	3.5	3.5	105.7	0	4.0519	76000000	17	1.73208	0.00255131	2.17677	1.29599	F6WR09;Q9ULJ6;E7EWM3;A0A087X127;Q8NF64	F6WR09;Q9ULJ6;E7EWM3;A0A087X127;Q8NF64	Zinc finger MIZ domain-containing protein 1;Zinc finger MIZ domain-containing protein 2	ZMIZ1;ZMIZ2	881
21.9882	22.4196	22.4651	22.1488	20.8191	21.1332	20.5261	19.8576	+	LFQ intensity HDAC1_LFQ intensity NLS	28	28	28	23.4	23.4	23.4	227.73	0	102.78	451000000	90	2.88887	0.0025259	1.67142	1.29104	E7ETA6;Q15154;A6NNN6;H0YBA1;E7EV93;E5RGQ4;E9PGW9	E7ETA6;Q15154;A6NNN6	Pericentriolar material 1 protein	PCM1	696
25.1293	25.7312	25.7821	25.4488	23.867	23.7286	24.2821	24.0854	+	LFQ intensity HDAC1_LFQ intensity NLS	44	44	44	23.2	23.2	23.2	284.52	0	264.81	2710000000	417	3.6679	0.00295652	1.53208	1.2838	Q15652;H7BXU7	Q15652	Probable JmjC domain-containing histone demethylation protein 2C	JMJD1C	2710
22.2036	22.2477	22.8932	22.4015	20.9388	20.5451	20.9388	21.1519	+	LFQ intensity HDAC1_LFQ intensity NLS	14	14	1	23.4	23.4	2.2	88.843	0	323.31	379000000	119	3.57472	0.00295069	1.54286	1.28307	Q9H8E8	Q9H8E8	Cysteine-rich protein 2-binding protein	CSRP2BP	3913
21.4775	20.7553	21.8461	21.5823	20.5823	19.668	18.9344	19.1002	+	LFQ intensity HDAC1_LFQ intensity NLS	6	6	6	21.8	21.8	21.8	43.818	0	14.764	86000000	23	2.24581	0.00307451	1.84409	1.28156	Q9BUL5;A0A087WVQ2;I3L4Q4;I3L0Y2;I3L1N0;I3L410;I3L0X3;I3L2W6	Q9BUL5;A0A087WVQ2;I3L4Q4;I3L0Y2;I3L1N0	PHD finger protein 23	PHF23	3726
25.4551	25.7771	25.4202	25.4488	24.3578	24.239	23.7077	23.6649	+	LFQ intensity HDAC1_LFQ intensity NLS	21	21	21	46.3	46.3	46.3	58.024	0	109.63	1820000000	268	3.61939	0.00306849	1.53296	1.28018	P40227;Q92526;J3KRI6	P40227	T-complex protein 1 subunit zeta	CCT6A	2016	+
24.7182	25.2926	25.4362	24.7286	23.155	22.7776	23.7796	23.7695	+	LFQ intensity HDAC1_LFQ intensity NLS	29	29	29	47	47	47	102.02	0	323.31	2210000000	284	2.78527	0.0030625	1.67349	1.27843	Q8IYH5;C9JUA4;C9J283	Q8IYH5	ZZ-type zinc finger-containing protein 3	ZZZ3	3186
25.0105	24.0854	23.7389	25.019	21.4273	24.4676	21.4118	21.0292	+	LFQ intensity HDAC1_LFQ intensity NLS	54	54	54	75.9	75.9	75.9	92.902	0	323.31	133000000000	1398	1.4804	0.00305058	2.37949	1.27671	O60341;R4GMQ1;R4GMP9	O60341	Lysine-specific histone demethylase 1A	KDM1A	1434	+
23.1379	23.9847	23.8481	23.3101	21.7471	21.7634	22.0886	22.3376	+	LFQ intensity HDAC1_LFQ intensity NLS	23	23	1	23.9	23.9	1.2	164.98	0	323.31	773000000	157	3.15247	0.00332177	1.58599	1.26977	Q14C86;C9IZ08;B4DGD8;H0Y7I9;A0A0A0MQV8	Q14C86;C9IZ08;B4DGD8;H0Y7I9	GTPase-activating protein and VPS9 domain-containing protein 1	GAPVD1	2646
26.0588	26.4831	26.7389	26.2151	24.6865	24.8044	25.1871	24.8044	+	LFQ intensity HDAC1_LFQ intensity NLS	32	32	32	53.9	53.9	53.9	70.171	0	323.31	5300000000	510	3.72409	0.00331538	1.5034	1.26826	Q96EA4;H0YBG5;D6RC83;D6RIF7;D6RIB8;D6R936;D6REZ1;D6RCL1;D6RDK5	Q96EA4	Protein Spindly	SPDL1	3505
24.3307	24.5225	23.8858	24.5983	22.8442	22.5093	23.0426	22.8913	+	LFQ intensity HDAC1_LFQ intensity NLS	30	30	29	40.1	40.1	39.4	129.53	0	217.33	1560000000	310	3.61245	0.00330268	1.51248	1.26527	Q8N1G0;F8WCX2;H0Y5I5;A6PVV7;A2A3Q2	Q8N1G0;F8WCX2;H0Y5I5	Zinc finger protein 687	ZNF687	3207	+
22.3211	23.2244	23.5285	22.6386	21.0292	20.8499	21.1581	21.8461	+	LFQ intensity HDAC1_LFQ intensity NLS	28	28	28	36.2	36.2	36.2	120.27	0	204.82	561000000	114	2.55751	0.00329637	1.70732	1.26472	Q86V48;E5RFK8;E5RHU7	Q86V48	Leucine zipper protein 1	LUZP1	3111
21.7098	21.0156	21.0156	21.1581	21.5213	18.5114	17.1307	17.6477	+	LFQ intensity HDAC1_LFQ intensity NLS	4	4	3	36.6	36.6	27.4	18.559	0	8.2137	109000000	28	1.35185	0.00328381	2.52197	1.26382	Q96G61;Q8NFP7;F8VRL4;F8VRR0;A0A0C4DGJ4	Q96G61;Q8NFP7	Diphosphoinositol polyphosphate phosphohydrolase 3-beta;Diphosphoinositol polyphosphate phosphohydrolase 3-alpha	NUDT11;NUDT10	3529
26.604	26.6458	26.9089	26.726	25.1604	25.2996	25.5869	25.1946	+	LFQ intensity HDAC1_LFQ intensity NLS	36	36	28	30.6	30.6	26.7	152.22	0	323.31	7830000000	667	4.68261	0.00360531	1.41077	1.26185	O60885;M0QZD9;M0QYW0;M0R0H4	O60885;M0QZD9	Bromodomain-containing protein 4	BRD4	1459
21.5451	21.9812	21.8727	21.8499	20.1946	19.6417	20.6364	20.5261	+	LFQ intensity HDAC1_LFQ intensity NLS	16	16	2	27.6	27.6	3.5	110.67	0	32.998	281000000	55	3.1829	0.00359168	1.56251	1.25791	Q6ZRI6	Q6ZRI6	Uncharacterized protein C15orf39	C15orf39	3020
24.3443	24.2317	23.4041	24.275	22.1825	22.5938	22.8269	22.3672	+	LFQ intensity HDAC1_LFQ intensity NLS	37	37	37	27.4	27.4	27.4	212.67	0	188.21	1330000000	295	3.01883	0.00391045	1.57118	1.24548	P21675;Q8IZX4;H0Y9L7;H7BY98;H7C2K9;H0Y8N6	P21675;Q8IZX4	Transcription initiation factor TFIID subunit 1;Transcription initiation factor TFIID subunit 1-like	TAF1;TAF1L	1842
22.2792	22.2155	21.4726	21.8152	20.7796	20.8113	18.132	19.8253	+	LFQ intensity HDAC1_LFQ intensity NLS	6	6	6	16.6	16.6	16.6	66.509	0	46.79	120000000	41	1.69716	0.00388868	2.0586	1.24331	Q8N8S7;A0A075B6E5	Q8N8S7	Protein enabled homolog	ENAH	3245
19.7273	19.9742	20.1946	19.5915	18.0735	18.5328	18.8238	17.5878	+	LFQ intensity HDAC1_LFQ intensity NLS	6	6	6	15.8	15.8	15.8	64.97	0	11.441	74400000	25	2.76226	0.00387431	1.61746	1.24249	P17098;K7EQD1	P17098	Zinc finger protein 8	ZNF8	1798
21.4425	21.5869	22.3184	21.5869	22.3211	17.4318	18.0145	18.6559	+	LFQ intensity HDAC1_LFQ intensity NLS	6	6	3	16.5	16.5	9.2	62.495	0	10.557	184000000	20	1.24376	0.00401473	2.62786	1.24063	O60907;Q9BQ87;C9JP56;A0A0D9SFI2;C9J5F9	O60907	F-box-like/WD repeat-containing protein TBL1X	TBL1X	1460
21.0756	20.7389	21.1395	20.0559	19.649	18.3609	19.6311	17.7665	+	LFQ intensity HDAC1_LFQ intensity NLS	6	6	6	13.7	13.7	13.7	99.692	0	10.056	105000000	23	1.92868	0.00400735	1.90059	1.24028	A0JP02;B4DJX4;Q9HAU0;H0YGJ6	A0JP02;B4DJX4;Q9HAU0	Pleckstrin homology domain-containing family A member 5	PLEKHA5	336
20.4676	20.7389	21.1015	20.9742	19.5375	19.0795	17.2142	19.6204	+	LFQ intensity HDAC1_LFQ intensity NLS	9	9	7	22.1	22.1	18.6	67.585	0	23.384	109000000	24	1.82751	0.004	1.95764	1.23952	P10398;Q96II5	P10398;Q96II5	Serine/threonine-protein kinase A-Raf	ARAF	1719
20.5356	21.0088	20.2066	20.4775	19.6435	18.2948	16.9507	19.285	+	LFQ intensity HDAC1_LFQ intensity NLS	4	4	4	10.1	10.1	10.1	59.356	0	11.458	106000000	15	1.74151	0.00399267	2.01362	1.23891	Q8WVX9;E9PNW8;E9PPB8	Q8WVX9;E9PNW8	Fatty acyl-CoA reductase 1	FAR1	3368
22.8651	22.9795	23.2678	22.8576	21.5961	21.9424	20.8034	21.4118	+	LFQ intensity HDAC1_LFQ intensity NLS	26	26	26	26.2	26.2	26.2	191.48	0	199.32	409000000	102	3.03269	0.00398537	1.55409	1.23626	Q02952	Q02952	A-kinase anchor protein 12	AKAP12	2429
21.8269	23.0837	23.2036	23.184	20.8269	20.8876	20.9742	21.7223	+	LFQ intensity HDAC1_LFQ intensity NLS	16	16	16	26.5	26.5	26.5	90.359	0	65.133	361000000	108	2.3287	0.0039781	1.7218	1.23558	Q9Y6A5;E7EMT0;C9JA91;Q8IX09;C9JWI7;H0Y8F2;F8WC55	Q9Y6A5	Transforming acidic coiled-coil-containing protein 3	TACC3	4387
20.002	19.8097	20.265	19.0053	18.3466	18.1436	18.511	17.0801	+	LFQ intensity HDAC1_LFQ intensity NLS	6	6	6	14	14	14	76.615	0	15.942	35800000	14	2.22237	0.00394213	1.75018	1.23126	Q13480;B7Z3B9;H0Y8F4;D6RIF8;D6RIS0	Q13480;B7Z3B9	GRB2-associated-binding protein 1	GAB1	2553
23.1825	23.1765	23.074	23.2375	21.8839	21.8876	21.9707	21.6886	+	LFQ intensity HDAC1_LFQ intensity NLS	16	16	13	19.9	19.9	17.2	140.4	0	69.049	587000000	125	5.86495	0.00402162	1.30992	1.22553	Q9NSC2;H3BSM9;H3BQ32	Q9NSC2;H3BSM9	Sal-like protein 1	SALL1	4017
19.7699	20.1332	20.002	20.1703	17.4015	18.7049	17.8403	19.1914	+	LFQ intensity HDAC1_LFQ intensity NLS	11	11	11	13.6	13.6	13.6	122.15	0	22.641	127000000	25	2.23125	0.00426571	1.73433	1.22498	Q9UPN4;I3L2J8;I3L2X7;I3L316;I3L4M5	Q9UPN4;I3L2J8;I3L2X7	Centrosomal protein of 131 kDa	CEP131	4266
24.3712	24.8433	25.2426	24.5812	23.0625	22.9619	23.3239	23.6209	+	LFQ intensity HDAC1_LFQ intensity NLS	36	36	36	42.7	42.7	42.7	116.92	0	323.31	1900000000	389	3.14775	0.00425806	1.51728	1.22486	O15294;C9JZL3	O15294	UDP-N-acetylglucosamine--peptide N-acetylglucosaminyltransferase 110 kDa subunit	OGT	1362
19.9601	20.9601	20.3321	21.1395	18.5887	17.9679	17.8032	20.1703	+	LFQ intensity HDAC1_LFQ intensity NLS	11	11	11	25.4	25.4	25.4	102.61	0	62.519	156000000	36	1.75586	0.00425045	1.96542	1.22425	I6L8A6;Q99708;J3QSH7;F6Q6H0;J3QLH2;J3QL00;J3QLW6	I6L8A6;Q99708	DNA endonuclease RBBP8	RBBP8	1157
22.4947	22.4825	22.3725	22.2185	21.2477	21.0625	20.9024	20.9951	+	LFQ intensity HDAC1_LFQ intensity NLS	17	17	17	35.7	35.7	35.7	70.182	0	163.84	457000000	100	5.04421	0.00430442	1.34011	1.22145	Q9UBU9;E9PIN3;B4E227;E9PQA4;E9PLA7;H0YDU0	Q9UBU9;E9PIN3	Nuclear RNA export factor 1	NXF1	4163
[truncated: 313 more rows]

## Sheet: HDAC1 S0=2
LFQ intensity HDAC1-02	LFQ intensity HDAC1-03	LFQ intensity HDAC1-04	LFQ intensity HDAC1-01	LFQ intensity NLS-01	LFQ intensity NLS-01r	LFQ intensity NLS-02	LFQ intensity NLS-03	Student's T-test Significant LFQ intensity HDAC1_LFQ intensity NLS	Student's T-test significant	Peptides	Razor + unique peptides	Unique peptides	Sequence coverage [%]	Unique + razor sequence coverage [%]	Unique sequence coverage [%]	Mol. weight [kDa]	Q-value	Score	Intensity	MS/MS count	-Log Student's T-test p-value LFQ intensity HDAC1_LFQ intensity NLS	Student's T-test q-value LFQ intensity HDAC1_LFQ intensity NLS	Student's T-test Difference LFQ intensity HDAC1_LFQ intensity NLS	Student's T-test Test statistic LFQ intensity HDAC1_LFQ intensity NLS	Protein IDs	Majority protein IDs	Protein names	Gene names	id	known interactors
[truncated: 460 more rows]

[truncated: 4 more sheets: CoREST1 S0=1, CoREST S0=2, PHF21A S0=1, PHF21A S0=2]
