# Supplementary material for: Proximity-dependent biotin identification (BioID) reveals a dynamic LSD1–CoREST interactome during embryonic stem cell differentiation
Source: Mol Omics. 2021 Oct 14;18(1):31–44. doi: 10.1039/d1mo00236h (PMC8763317; doi:10.1039/d1mo00236h)
Supplement: MO-018-D1MO00236H-s003 [file MO-018-D1MO00236H-s003.xlsx]

## Sheet: LSD1 Vs NLS s0 2 sig ANOVA
LFQ intensity LSD1-0hr_B10	LFQ intensity LSD1-0hr_B11	LFQ intensity LSD1-0hr_B8	LFQ intensity LSD1-0hr_B8b	LFQ intensity LSD1-24hr_B10	LFQ intensity LSD1-24hr_B11	LFQ intensity LSD1-24hr_B8	LFQ intensity LSD1-24hr_B8b	LFQ intensity LSD1-66hr_B10	LFQ intensity LSD1-66hr_B11	LFQ intensity LSD1-66hr_B8	LFQ intensity LSD1-66hr_B8b	Only identified by site	Reverse	Potential contaminant	Student's T-test Significant LSD1-0hr_NLS-0hr	Student's T-test significant	Student's T-test Significant LSD1-24hr_NLS-24hr	Student's T-test significant_	Student's T-test Significant LSD1-66hr_NLS-66hr	Student's T-test significant__	ANOVA Significant	Peptides	Razor + unique peptides	Unique peptides	Sequence coverage [%]	Unique + razor sequence coverage [%]	Unique sequence coverage [%]	Mol. weight [kDa]	Q-value	Score	Intensity	MS/MS count	LFQ intensity LSD1-0hr # valid values	LFQ intensity LSD1-24hr # valid values	LFQ intensity LSD1-66hr # valid values	LFQ intensity NLS-0hr # valid values	LFQ intensity NLS-24hr # valid values	LFQ intensity NLS-66hr # valid values	Student's T-test p-value LSD1-0hr_NLS-0hr	Student's T-test q-value LSD1-0hr_NLS-0hr	Student's T-test Difference LSD1-0hr_NLS-0hr	Student's T-test Test statistic LSD1-0hr_NLS-0hr	Student's T-test p-value LSD1-24hr_NLS-24hr	Student's T-test q-value LSD1-24hr_NLS-24hr	Student's T-test Difference LSD1-24hr_NLS-24hr	Student's T-test Test statistic LSD1-24hr_NLS-24hr	Student's T-test p-value LSD1-66hr_NLS-66hr	Student's T-test q-value LSD1-66hr_NLS-66hr	Student's T-test Difference LSD1-66hr_NLS-66hr
E	E	E	E	E	E	E	E	E	E	E	E	C	C	C	C	C	C	C	C	C	C	N	N	N	N	N	N	N	N	N	N	N	N	N	N	N	N	N	N	N	N	N	N	N	N	N	N	N	N
27.9031	27.7645	28.6663	28.3282	27.8564	27.8682	28.0965	28.258	27.9977	28.2262	29.0914	28.4591				+	LSD1-0hr_NLS-0hr	+	LSD1-24hr_NLS-24hr	+	LSD1-66hr_NLS-66hr		34	34	29	78.5	78.5	70.4	52.714	0	323.31	3150700000	463	4	4	4	3	3	4	1.22e-06	0	11.4991	4.43373	1.46e-05	0	10.7651	3.78017	2.71e-07	0	11.5931
28.0557	27.5826	27.8081	28.5898	27.4473	27.1312	27.4234	27.0296	27.7129	27.611	27.217	27.6251				+	LSD1-0hr_NLS-0hr	+	LSD1-24hr_NLS-24hr	+	LSD1-66hr_NLS-66hr		62	62	54	56.6	56.6	49.1	184.15	0	323.31	2012500000	650	4	4	4	4	4	3	1.21e-06	0	10.3906	4.09793	0.000351583	0	9.61732	2.89006	4.16e-05	0	7.83911
27.3828	26.5507	27.8799	27.673	27.0711	25.4923	26.5898	26.965	26.1984	25.7234	26.5359	27.1795				+	LSD1-0hr_NLS-0hr	+	LSD1-24hr_NLS-24hr	+	LSD1-66hr_NLS-66hr		30	30	30	47.7	47.7	47.7	70.881	0	323.31	1311200000	290	4	4	4	4	3	2	5.47e-07	0	9.60868	3.94948	5.68e-07	0	8.82467	3.67683	3.15e-05	0	7.93522
32.3357	31.901	32.4134	32.2019	32.2535	32.0512	32.5822	32.5481	32.08	32.0737	32.4007	32.2591				+	LSD1-0hr_NLS-0hr	+	LSD1-24hr_NLS-24hr	+	LSD1-66hr_NLS-66hr		60	60	60	79.8	79.8	79.8	92.849	0	323.31	50261000000	1682	4	4	4	4	4	4	1.71e-05	0	10.0945	3.58413	2.24e-05	0	9.93399	3.4953	3.69e-05	0	10.4486
29.066	29.3992	28.8234	28.604	28.6216	29.0788	29.1263	29.21	28.5165	28.3109	28.2445	28.6527				+	LSD1-0hr_NLS-0hr	+	LSD1-24hr_NLS-24hr	+	LSD1-66hr_NLS-66hr		71	70	70	72.6	71.9	71.9	113.6	0	323.31	4587500000	749	4	4	4	4	4	4	3.25e-06	0	9.09086	3.56003	4.98e-05	0	9.7648	3.30904	1.02e-06	0	10.9408
25.9406	25.3031	26.8264	26.4676	25.705	25.0359	26.2002	26.2785	24.6595	24.8385	25.8069	25.5638				+	LSD1-0hr_NLS-0hr	+	LSD1-24hr_NLS-24hr	+	LSD1-66hr_NLS-66hr		19	19	19	56.5	56.5	56.5	35.869	0	220.24	627370000	165	4	4	4	1	0	0	1.36e-06	0	8.12641	3.34864	4.97e-07	0	8.06937	3.4225	1.41e-05	0	7.15826
30.1115	29.7708	30.5481	30.3828	30.1724	29.6004	30.4532	30.6798	29.6216	29.0349	29.8945	29.6407				+	LSD1-0hr_NLS-0hr	+	LSD1-24hr_NLS-24hr	+	LSD1-66hr_NLS-66hr		69	69	69	68.2	68.2	68.2	136.23	0	323.31	11426000000	1239	4	4	4	4	4	4	7.95e-07	0	7.74437	3.26542	2.12e-06	0	7.65241	3.1449	6.42e-06	0	7.99554
24.7746	24.2821	24.8044	24.8481	26.0894	25.9825	25.4707	25.5869	26.673	26.2996	26.8504	26.9089				+	LSD1-0hr_NLS-0hr	+	LSD1-24hr_NLS-24hr	+	LSD1-66hr_NLS-66hr	+	39	39	39	50.2	50.2	50.2	97.336	0	323.31	590050000	344	4	4	4	0	1	1	1.61e-08	0	6.94646	3.19628	1.9e-06	0	7.61913	3.14368	6.7e-05	0	8.37915
28.0813	27.5609	27.5014	27.8741	28.9202	29.0583	28.9202	28.995	26.9316	26.7771	26.8019	26.7129				+	LSD1-0hr_NLS-0hr	+	LSD1-24hr_NLS-24hr	+	LSD1-66hr_NLS-66hr	+	56	56	56	49	49	49	152.65	0	323.31	2960600000	594	4	4	4	4	4	4	5.94e-06	0	8.04961	3.16509	4.07e-06	0	6.22014	2.59862	3.22e-07	0	7.65673
24.5225	24.4488	24.7945	24.5165	24.895	24.7024	25.2058	25.4298	25.5667	25.5433	26.2244	25.9517				+	LSD1-0hr_NLS-0hr	+	LSD1-24hr_NLS-24hr	+	LSD1-66hr_NLS-66hr		21	16	4	51.4	42.6	10.3	60.899	0	214.75	390400000	170	4	4	4	0	0	0	8.69e-07	0	7.06461	3.01372	3.25e-06	0	7.09162	2.91606	1.37e-07	0	7.56623
30.2979	29.4093	30.7047	30.0864	29.9259	29.7341	30.2308	29.9539	28.2891	28.3951	29.3494	28.5934				+	LSD1-0hr_NLS-0hr	+	LSD1-24hr_NLS-24hr	+	LSD1-66hr_NLS-66hr	+	33	32	32	70.4	70.4	70.4	57.907	0	323.31	9233200000	514	4	4	4	4	4	4	1.13e-06	0	6.907	2.93684	8.41e-08	0	7.0613	3.16325	4.03e-06	0	6.74504
32.1664	32.1269	32.1269	31.9983	32.3489	32.5156	32.1422	32.341	31.933	31.9188	32.3061	32.1453				+	LSD1-0hr_NLS-0hr	+	LSD1-24hr_NLS-24hr	+	LSD1-66hr_NLS-66hr		109	109	103	76.2	76.2	73.3	154.64	0	323.31	47277000000	2713	4	4	4	4	4	4	3.83e-08	0	6.31882	2.89558	1.17e-06	0	6.47215	2.77622	2.44e-07	0	6.38358
24.3511	24.4488	24.5225	24.5285	23.9933	24.1488	23.8481	24.0854	23.632	24.1642	23.8576	24.1015				+	LSD1-0hr_NLS-0hr	+	LSD1-24hr_NLS-24hr	+	LSD1-66hr_NLS-66hr		20	20	20	31.5	31.5	31.5	109.95	0	164.02	175910000	168	4	4	4	0	0	0	6.62e-06	0	6.67535	2.71482	4.61e-06	0	6.1102	2.5513	1.14e-06	0	6.16146
24.4425	23.1916	23.7895	24.5105	24.3975	24.6096	24.4984	24.8385	25.433	25.4266	25.3943	25.4923				+	LSD1-0hr_NLS-0hr	+	LSD1-24hr_NLS-24hr	+	LSD1-66hr_NLS-66hr		19	19	19	35	35	35	99.136	0	155.57	279980000	198	4	4	4	0	3	1	3.71e-06	0	5.84894	2.47392	1.11e-06	0	6.75164	2.88197	5.03e-06	0	6.8659
24.8997	25.065	23.2506	25.239	24.2463	23.391	22.867	24.5165	25.4394	25.4362	24.6865	25.2643				+	LSD1-0hr_NLS-0hr	+	LSD1-24hr_NLS-24hr	+	LSD1-66hr_NLS-66hr		34	34	34	29.1	29.1	29.1	187.2	0	201.43	252320000	192	4	4	4	1	2	3	2.37e-05	0	6.2462	2.46434	0.000131261	0	5.87797	2.19389	5.98e-07	0	6.5935
28.7292	28.5165	28.8534	28.6075	29.2602	28.9146	29.5664	29.6714	30.3828	30.0217	31.2535	31.0927				+	LSD1-0hr_NLS-0hr	+	LSD1-24hr_NLS-24hr	+	LSD1-66hr_NLS-66hr	+	72	72	71	63.2	63.2	62.4	124.79	0	323.31	9799700000	1166	4	4	4	4	4	4	9.35e-08	0	5.22866	2.40388	3.59e-07	0	5.54161	2.48213	6.83e-06	0	5.46878
23.1301	24.9584	24.1095	23.3778	23.867	24.2678	23.5754	24.0526	24.2535	24.1488	23.2535	24.0608				+	LSD1-0hr_NLS-0hr	+	LSD1-24hr_NLS-24hr				1	1	1	2.1	2.1	2.1	105.54	0.0072216	2.5102	327420000	64	4	4	4	0	0	4	2.76e-05	0	5.19937	2.1163	1.22e-06	0	6.4736	2.7735	0.699805	0.665204	0.217685
23.9584	22.7975	22.6231	24.217	23.9406	23.4676	23.214	24.317	24.8764	24.8044	24.6703	25.1055				+	LSD1-0hr_NLS-0hr	+	LSD1-24hr_NLS-24hr	+	LSD1-66hr_NLS-66hr		24	24	23	37.9	37.9	37	104.87	0	292.37	177370000	181	4	4	4	0	1	2	3.08e-05	0	5.16784	2.09826	1.8e-05	0	5.4864	2.24132	5.5e-09	0	6.44569
27.8445	26.9089	28.4976	27.9031	27.611	27.8564	28.1459	27.8203	27.5898	27.2891	28.3745	27.7581				+	LSD1-0hr_NLS-0hr	+	LSD1-24hr_NLS-24hr	+	LSD1-66hr_NLS-66hr		23	16	16	63.7	48.4	48.4	55.302	0	242.45	2494600000	226	4	4	4	4	4	4	3.11e-05	0	4.5387	1.88549	1.19e-05	0	5.41774	2.24621	3.67e-06	0	4.30274
24.1719	23.0139	24.3239	24.2463	23.8481	22.9153	23.7995	24.2244	24.1015	23.9134	24.4488	23.867				+	LSD1-0hr_NLS-0hr	+	LSD1-24hr_NLS-24hr	+	LSD1-66hr_NLS-66hr		22	22	22	27.7	27.7	27.7	137.51	0	116.62	180560000	152	4	4	4	4	4	4	5.95e-05	0	4.39848	1.80126	8.68e-05	0	3.61467	1.51357	0.000461748	0.00268182	2.15998
22.2214	20.5165	23.0789	22.6822	23.4676	23.1095	24.48	25.0317	24.3239	24.2317	25.1833	24.9584				+	LSD1-0hr_NLS-0hr	+	LSD1-24hr_NLS-24hr	+	LSD1-66hr_NLS-66hr	+	19	19	19	42.9	42.9	42.9	74.219	0	207.4	180680000	145	4	4	4	2	1	3	0.00039415	0	4.63263	1.74611	2.84e-05	0	5.70946	2.2799	1.82e-05	0	5.50767
24.6376	24.0275	23.9847	24.8336	24.4923	24.6431	24.1946	25.1681	24.3578	23.4676	24.8191	24.7594				+	LSD1-0hr_NLS-0hr	+	LSD1-24hr_NLS-24hr	+	LSD1-66hr_NLS-66hr		34	28	28	71.9	62.5	62.5	70.07	0	178.53	247490000	218	4	4	4	4	4	4	0.000449899	0	4.38911	1.66629	0.00129843	0	4.41234	1.58798	0.000345524	0.0014054	4.08446
28.3367	27.7389	28.8712	28.3828	28.2354	28.5052	28.726	28.5052	28.17	28.1652	28.8741	28.2759				+	LSD1-0hr_NLS-0hr	+	LSD1-24hr_NLS-24hr	+	LSD1-66hr_NLS-66hr		26	26	19	63.3	63.3	47.7	55.074	0	291.27	3799100000	441	4	4	4	4	4	4	4.14e-06	0	3.72495	1.66562	7.43e-08	0	3.93374	1.84966	8.4e-07	0.0017931	3.73648
23.1658	21.3101	21.417	21.5498	23.5285	23.1063	23.0821	23.4298	24.391	23.9495	24.6595	24.8044				+	LSD1-0hr_NLS-0hr	+	LSD1-24hr_NLS-24hr	+	LSD1-66hr_NLS-66hr	+	20	20	20	32.3	32.3	32.3	122.46	0	163.04	122160000	128	4	4	4	1	2	2	0.000219592	0	3.91862	1.56957	4.55e-07	0	5.65267	2.51571	2.93e-06	0	5.89123
28.8887	28.5934	28.5826	29.0813	28.8324	28.7421	28.7195	29.3153	29.3536	29.1337	29.391	29.5916				+	LSD1-0hr_NLS-0hr	+	LSD1-24hr_NLS-24hr	+	LSD1-66hr_NLS-66hr		67	67	67	66.6	66.6	66.6	124.31	0	323.31	5752000000	1170	4	4	4	4	4	4	2.56e-06	0	3.38418	1.53974	4.11e-06	0	3.56387	1.60109	5.59e-06	0.00133333	3.41776
21.0493	21.0756	20.7223	20.6971	21.5165	21.1015	21.7013	21.7755	22.7389	21.5777	23.5638	23.5638				+	LSD1-0hr_NLS-0hr	+	LSD1-24hr_NLS-24hr	+	LSD1-66hr_NLS-66hr	+	10	10	10	26.4	26.4	26.4	79.147	0	54.854	46551000	42	4	4	4	1	2	1	1.77e-05	0	3.19109	1.41222	4.14e-05	0.00171429	3.05559	1.33538	0.000369371	0.00167742	4.32067
23.9847	23.6096	25.1488	23.8764	23.7077	23.1596	24.1332	24.0935	24.417	23.5285	25.1253	24.5404				+	LSD1-0hr_NLS-0hr	+	LSD1-24hr_NLS-24hr	+	LSD1-66hr_NLS-66hr		41	39	37	26.8	26.2	24.6	273.41	0	125.9	212800000	184	4	4	4	4	4	4	0.000296678	0.00215385	3.38425	1.37967	0.000111433	0	3.5365	1.47543	0.00205427	0.00104	3.35336
26.604	25.8576	26.4314	26.6998	26.5536	27.3153	26.5754	26.4202	26.1852	25.9134	26.3477	26.0894				+	LSD1-0hr_NLS-0hr	+	LSD1-24hr_NLS-24hr	+	LSD1-66hr_NLS-66hr		8	8	8	69.7	69.7	69.7	10.366	0	144.61	979590000	141	4	4	4	4	4	4	1.29e-05	0.0021	3.07734	1.37565	0.00018853	0	3.85373	1.55697	5.04e-05	0.000732394	2.34749
22.1642	21.6006	20.8499	21.4015	21.4066	20.5165	20.343	20.6714	22.2678	21.6051	22.6779	22.1143				+	LSD1-0hr_NLS-0hr	+	LSD1-24hr_NLS-24hr	+	LSD1-66hr_NLS-66hr		9	9	9	30.6	30.6	30.6	62.641	0	44.496	32846000	47	4	4	4	2	0	2	0.00022107	0.00336364	3.14656	1.31147	0.000590003	0.00118519	2.68604	1.11544	2.67e-05	0.00152941	3.80716
23.7077	23.1658	23.7286	23.5638	22.3752	22.743	22.5237	22.5261	20.5165	20.4972	20.8423	20.7056				+	LSD1-0hr_NLS-0hr	+	LSD1-24hr_NLS-24hr	+	LSD1-66hr_NLS-66hr	+	15	15	15	33.4	33.4	33.4	79.102	0	34.068	74143000	53	4	4	4	4	4	1	1.68e-06	0.00328889	2.80918	1.30478	1.44e-07	0.00188235	2.93185	1.39247	0.00688708	0.00622222	2.15209
26.8741	26.604	26.604	26.726	26.7389	26.7771	26.7771	26.9539	26.8973	26.673	27.4938	27.3745				+	LSD1-0hr_NLS-0hr	+	LSD1-24hr_NLS-24hr	+	LSD1-66hr_NLS-66hr		20	20	2	65.2	65.2	4	45.971	0	276.15	1305000000	277	4	4	4	4	4	4	3.32e-07	0.00314894	2.72176	1.28826	5.18e-06	0	3.66799	1.63614	5.86e-07	0	4.31058
22.8708	21.9207	22.0951	22.5237	22.4093	21.2006	22.5915	22.8171	23.4676	23.0967	23.7695	23.6096				+	LSD1-0hr_NLS-0hr	+	LSD1-24hr_NLS-24hr	+	LSD1-66hr_NLS-66hr		14	13	13	17.4	16.7	16.7	130.35	0	57.935	83906000	76	4	4	4	2	2	4	0.000212728	0.00308333	3.06759	1.28537	0.00933856	0.0012973	3.39192	1.1693	0.000229927	0.000753623	2.48266
22.8689	22.4349	22.9584	22.8538	22.4825	22.6253	23.0037	22.7935	23.1612	23.2678	23.632	23.7182				+	LSD1-0hr_NLS-0hr	+	LSD1-24hr_NLS-24hr	+	LSD1-66hr_NLS-66hr		21	21	21	33.8	33.8	33.8	100.62	0	95.311	92198000	115	4	4	4	4	4	4	1.75e-05	0.00302041	2.83009	1.26917	8.03e-06	0.0016	2.79377	1.27075	4.91e-05	0.00113043	3.22867
23.4041	23.6649	23.7492	23.5869	23.6431	23.3778	23.7077	23.7895	24.2463	24.391	24.8288	24.6971				+	LSD1-0hr_NLS-0hr	+	LSD1-24hr_NLS-24hr	+	LSD1-66hr_NLS-66hr		27	27	27	47.2	47.2	47.2	91.612	0	192.43	189840000	192	4	4	4	4	4	4	6.54e-05	0.00284615	2.85331	1.24518	2.88e-06	0.00126316	2.42252	1.12964	0.000100794	0.00212048	2.17867
24.0275	22.9513	21.9531	24.4923	23.3511	21.6276	22.632	24.4862	23.8858	22.3101	22.7035	23.5638				+	LSD1-0hr_NLS-0hr	+	LSD1-24hr_NLS-24hr	+	LSD1-66hr_NLS-66hr		26	26	26	23.9	23.9	23.9	217.39	0	231.98	124970000	140	4	4	4	4	3	4	0.00642534	0.00458182	3.40799	1.2029	0.00728464	0.00141176	3.39411	1.18974	0.00193831	0.00303158	2.17194
20.9459	19.9054	19.9068	20.0559	21.6497	21.6141	21.3592	21.9672	23.9672	23.7286	24.4551	24.4298				+	LSD1-0hr_NLS-0hr	+	LSD1-24hr_NLS-24hr	+	LSD1-66hr_NLS-66hr	+	12	8	8	40.6	31.7	31.7	47.744	0	56.423	73228000	43	4	4	4	0	0	0	0.000248983	0.00442105	2.74093	1.1637	0.00112386	0	4.20665	1.54548	1.45e-05	0	5.45327
21.743	21.2821	21.7265	21.9134	21.8307	22.0789	21.9316	22.1363	22.0426	22.9951	22.239	22.343				+	LSD1-0hr_NLS-0hr	+	LSD1-24hr_NLS-24hr	+	LSD1-66hr_NLS-66hr		8	8	8	26.6	26.6	26.6	54.532	0	34.415	43192000	60	4	4	4	2	1	0	0.00224112	0.00537931	2.96479	1.14809	0.000376663	0	3.87803	1.52547	7.9e-05	0.00173333	4.14586
24.2607	23.6096	23.0951	24.1795	21.6886	21.3962	21.0559	22.2096	22.3778	22.2036	21.5404	22.3101				+	LSD1-0hr_NLS-0hr	+	LSD1-24hr_NLS-24hr	+	LSD1-66hr_NLS-66hr	+	21	21	21	27.3	27.3	27.3	131.84	0	93.644	83443000	83	4	4	4	4	4	3	0.000281864	0.00606667	2.66755	1.13334	0.000133926	0.00114286	2.54257	1.10794	0.00948427	0.00083871	3.19421
21.9243	21.2066	21.4221	18.6096	22.2535	22.2477	20.417	21.8423	26.4661	25.5433	25.2643	26.228				+	LSD1-0hr_NLS-0hr	+	LSD1-24hr_NLS-24hr	+	LSD1-66hr_NLS-66hr	+	22	13	13	60.6	35.4	35.4	57.621	0	157.09	259190000	115	4	4	4	1	2	4	0.00629412	0.00596721	3.12223	1.1313	0.00578894	0.00130693	2.51261	0.966183	0.00663954	0.0224046	1.61481
24.5344	23.5983	24.5983	24.6264	24.1332	23.4425	23.9495	24.7895	25.1095	24.9043	25.4298	24.7389				+	LSD1-0hr_NLS-0hr	+	LSD1-24hr_NLS-24hr	+	LSD1-66hr_NLS-66hr		31	31	31	38.2	38.2	38.2	127.29	0	154.55	303830000	259	4	4	4	4	4	4	0.000172807	0.00587097	2.5888	1.11864	0.0105433	0.00764179	2.08995	0.813028	0.000196891	0.0103607	1.80285
25.8312	25.772	24.9271	26.0317	25.433	24.9803	25.1095	25.8433	26.7771	26.3359	26.1833	26.533				+	LSD1-0hr_NLS-0hr	+	LSD1-24hr_NLS-24hr	+	LSD1-66hr_NLS-66hr		34	34	34	38.1	38.1	38.1	144.86	0	323.31	700660000	471	4	4	4	4	4	4	0.000444695	0.00695385	2.54254	1.07439	0.00207206	0.00494118	2.09499	0.871051	1.28e-05	0.000722222	2.25784
23.6865	23.5522	23.2961	23.6209	23.7389	23.5869	23.7594	24.2607	24.1174	23.7492	24.2607	24.317				+	LSD1-0hr_NLS-0hr	+	LSD1-24hr_NLS-24hr	+	LSD1-66hr_NLS-66hr		16	16	16	27.6	27.6	27.6	104.72	0	73.368	168440000	145	4	4	4	4	4	4	1.55e-05	0.00674627	2.34075	1.07068	0.000760832	0.00154839	3.07464	1.23484	0.000334161	0.00101961	3.05871
19.9601	20.2302	20.3321	21.1332	21.9777	21.1332	21.2707	23.0983	23.867	23.3376	23.9584	24.3101				+	LSD1-0hr_NLS-0hr	+	LSD1-24hr_NLS-24hr	+	LSD1-66hr_NLS-66hr	+	22	22	22	44.5	44.5	44.5	66.695	0	323.31	70257000	74	4	4	4	0	1	0	0.00133909	0.00805797	2.59074	1.0532	0.0011653	0.00208696	3.79927	1.43015	4.86e-06	0	5.71884
23.5285	23.4676	23.5983	23.48	23.7492	23.6971	23.6209	24.0105	22.7013	22.7655	23.0326	23.1285				+	LSD1-0hr_NLS-0hr	+	LSD1-24hr_NLS-24hr	+	LSD1-66hr_NLS-66hr		15	15	15	31.9	31.9	31.9	79.565	0	103.92	139070000	127	4	4	4	4	4	4	2.11e-06	0.00761644	2.2158	1.04255	0.000341882	0.00245614	2.02869	0.890308	0.014738	0.0105333	2.14665
26.4473	25.8576	26.3828	26.5624	25.6348	25.1795	25.7103	25.9912	24.7492	24.604	24.6971	24.3239				+	LSD1-0hr_NLS-0hr	+	LSD1-24hr_NLS-24hr	+	LSD1-66hr_NLS-66hr	+	39	39	7	48.1	48.1	9.7	141.38	0	323.31	647690000	433	4	4	4	4	4	4	1.66e-05	0.00751351	2.27136	1.04056	0.000264505	0.00221818	2.0861	0.917597	8.79e-05	0.00262222	2.02883
21.1015	20.265	21.1079	22.3348	20.4476	20.0559	20.1206	20.9812	23.0691	22.6714	22.5475	23.3239				+	LSD1-0hr_NLS-0hr			+	LSD1-66hr_NLS-66hr	+	13	13	13	27.3	27.3	27.3	88.75	0	76.24	47521000	42	4	4	4	1	2	4	0.0108112	0.00741333	2.86552	1.02823	0.122275	0.0929529	1.10852	0.423666	0.000461973	0.00491429	1.96176
25.5812	25.6944	25.6676	25.5225	25.673	26.2553	25.9672	26.1507	24.2678	24.5696	25.1253	24.945				+	LSD1-0hr_NLS-0hr	+	LSD1-24hr_NLS-24hr	+	LSD1-66hr_NLS-66hr		33	33	33	40.8	40.8	40.8	138.59	0	215.52	569820000	362	4	4	4	4	4	4	2.39e-08	0.00722078	2.10153	1.02215	8.54e-06	0.00128	2.53898	1.16345	0.000221934	0.00110638	3.2863
26.976	26.2021	27.1312	27.1312	26.673	26.5898	26.976	27.0813	26.5898	26.4999	26.9089	26.7389				+	LSD1-0hr_NLS-0hr	+	LSD1-24hr_NLS-24hr	+	LSD1-66hr_NLS-66hr		53	53	53	40.7	40.7	40.7	172.44	0	323.31	1390500000	776	4	4	4	4	4	4	7.79e-05	0.00712821	2.25218	1.00666	5.57e-06	0.00112941	2.39061	1.10698	8.59e-06	0.000693333	2.19834
21.1395	20.9882	21.0691	19.9742	21.0426	20.8802	21.3211	21.823	20.2302	20.9951	20.7389	20.4576				+	LSD1-0hr_NLS-0hr	+	LSD1-24hr_NLS-24hr	+	LSD1-66hr_NLS-66hr		4	4	3	10.2	10.2	8.6	63.505	0	15.057	22918000	28	4	4	4	2	3	3	0.00275871	0.00789873	2.44024	0.976185	3.31e-05	0.0013913	2.65706	1.18567	0.00385137	0.0126154	1.89139
21.7389	20.9243	21.5869	21.2244	21.4526	22.2564	21.6231	21.8987	19.5011	20.6714	20.8269	20.1332				+	LSD1-0hr_NLS-0hr	+	LSD1-24hr_NLS-24hr	+	LSD1-66hr_NLS-66hr	+	8	8	8	37.3	37.3	37.3	31.01	0	19.92	30106000	36	4	4	4	4	4	1	7.23e-05	0.0078	2.16955	0.974828	0.000138562	0.00133333	2.24469	0.992388	0.0382936	0.0291626	1.59949
23.4551	22.8987	23.7695	23.7077	23.0918	22.9225	23.3511	23.632	22.1395	21.6096	22.7533	22.632				+	LSD1-0hr_NLS-0hr	+	LSD1-24hr_NLS-24hr	+	LSD1-66hr_NLS-66hr		14	14	8	26.3	26.3	17.5	83.752	0	62.119	108360000	122	4	4	4	4	4	4	0.000101362	0.0077037	2.16347	0.966361	0.00032827	0.00228037	2.14335	0.935057	0.000480386	0.000881356	2.72641
21.5823	19.5255	21.1581	21.5638	21.4923	20.9459	23.0459	22.019	18.9736	18.1661	19.56	18.6203				+	LSD1-0hr_NLS-0hr	+	LSD1-24hr_NLS-24hr			+	5	5	5	17.4	17.4	17.4	66.807	0	13.414	35185000	11	3	4	0	0	0	0	0.0125888	0.00814458	2.59186	0.946872	0.000158632	0	4.08662	1.64221	1	1	0
22.1047	20.8876	22.823	22.343	22.5309	22.0886	22.2792	22.4626	22.6886	22.9024	23.2463	23.0886				+	LSD1-0hr_NLS-0hr	+	LSD1-24hr_NLS-24hr	+	LSD1-66hr_NLS-66hr		9	9	9	25	25	25	60.501	0	73.836	69224000	61	4	4	4	4	4	4	0.0015423	0.00804762	2.28186	0.944346	1.46e-06	0.00110345	2.31241	1.08927	1.71e-06	0.001	2.67282
24.5926	24.6153	24.558	24.5983	24.7645	25.4831	24.8717	25.1015	23.1206	23.4298	23.8764	23.3239				+	LSD1-0hr_NLS-0hr	+	LSD1-24hr_NLS-24hr	+	LSD1-66hr_NLS-66hr	+	33	33	33	33.2	33.2	33.2	144.54	0	323.31	273260000	259	4	4	4	4	4	4	6.65e-05	0.00832558	2.06599	0.934143	7.58e-06	0.00133333	2.56702	1.1772	6.3e-05	0.00144444	3.83206
26.9539	26.518	27.5826	26.9977	27.4234	27.4551	27.6798	27.7958	26.8973	26.8623	27.6865	27.3239				+	LSD1-0hr_NLS-0hr	+	LSD1-24hr_NLS-24hr	+	LSD1-66hr_NLS-66hr		56	56	1	60.7	60.7	0.9	108.35	0	285.05	2004200000	746	4	4	4	4	4	4	0.000137453	0.00891954	2.07354	0.925033	4.99e-07	0.00152381	2.61155	1.23428	0.000202011	0.00628037	1.90494
23.5045	22.4526	21.7182	23.2678	20.9742	20.9601	28.0914	20.8423	22.741	23.7182	22.4375	23.2821				+	LSD1-0hr_NLS-0hr						58	58	58	24.3	24.3	24.3	332.91	0	323.31	424630000	149	4	4	4	4	4	4	0.025189	0.0109053	2.54831	0.890992	0.532043	0.178988	1.21124	0.316474	0.897012	0.923386	0.0536103
25.0484	24.9584	25.0148	25.0484	25.019	25.1565	24.9316	25.141	25.3712	25.3844	25.7871	25.7208				+	LSD1-0hr_NLS-0hr	+	LSD1-24hr_NLS-24hr	+	LSD1-66hr_NLS-66hr		52	52	52	33.7	33.7	33.7	237.47	0	323.31	473600000	431	4	4	4	4	4	4	5.53e-08	0.0106804	1.8223	0.886388	1.96e-07	0.00247788	1.85282	0.894977	8.58e-06	0.00214634	2.10966
21.7348	21.4923	20.0559	21.4874	20.4775	20.4375	20.4375	20.9882	20.7634	20.5638	20.2066	20.6886				+	LSD1-0hr_NLS-0hr	+	LSD1-24hr_NLS-24hr	+	LSD1-66hr_NLS-66hr		11	10	9	9.9	8.7	7.8	175.55	0	21.821	22405000	43	4	4	4	3	3	3	0.00835174	0.0106667	2.23118	0.865514	0.00246367	0.0167853	1.67436	0.717015	4.11e-05	0.0122029	1.66979
24.0608	22.1886	23.0071	24.1174	21.4775	20.8346	28.3578	20.8191	21.7307	22.4451	20.7796	22.0054				+	LSD1-0hr_NLS-0hr						30	30	26	50.6	50.6	45	81.8	0	179.25	514340000	111	4	4	4	4	4	4	0.0504162	0.0114951	2.66864	0.862704	0.708066	0.332207	0.754858	0.192473	0.92837	0.920312	0.0632353
21.8802	21.6096	21.0426	21.3857	22.5892	22.5451	22.44	22.5915	20.3101	20.3962	20.5356	20.4972				+	LSD1-0hr_NLS-0hr	+	LSD1-24hr_NLS-24hr	+	LSD1-66hr_NLS-66hr	+	13	13	13	28.1	28.1	28.1	100.83	0	38.147	42104000	47	4	4	4	3	4	0	0.0135876	0.0116981	2.21994	0.839946	3e-05	0.00145055	2.28099	1.03522	0.000373755	0.000742857	2.51614
21.2989	21.8073	20.2989	20.0951	21.4626	22.0326	21.1581	21.2764	24.4105	23.7995	23.6096	24.5344				+	LSD1-0hr_NLS-0hr	+	LSD1-24hr_NLS-24hr			+	24	3	2	62.3	15.2	7.1	57.6	0	64.331	107530000	55	4	4	4	3	2	4	0.00595768	0.0118519	2.10035	0.838419	0.0463136	0.00669841	2.50463	0.834743	0.210702	0.319978	0.521294
21.8538	22.5189	21.1332	21.823	21.9243	21.7915	20.9024	22.2448	20.0559	19.7089	18.0468	18.2849				+	LSD1-0hr_NLS-0hr	+	LSD1-24hr_NLS-24hr			+	8	8	8	31.6	31.6	31.6	50.974	0	59.717	29465000	33	4	4	2	4	3	0	0.000867781	0.012	1.92167	0.830487	0.011717	0.00132	2.65322	0.967548	0.166731	0.165746	0.863249
21.1519	20.8191	21.391	20.4775	21.2764	21.265	21.7348	21.4324	19.8484	20.3538	20.4576	20.5545				+	LSD1-0hr_NLS-0hr	+	LSD1-24hr_NLS-24hr	+	LSD1-66hr_NLS-66hr		8	8	8	26.9	26.9	26.9	61.758	0	28.889	26230000	33	4	4	4	2	2	1	0.00142072	0.0126372	1.94517	0.827989	0.00053035	0.00117073	2.67029	1.11369	0.0407941	0.0238251	1.74209
20.3211	18.2063	20.3752	20.2066	20.4972	20.4775	20.3962	18.011	20.4375	20.5731	20.6627	20.3857				+	LSD1-0hr_NLS-0hr	+	LSD1-24hr_NLS-24hr	+	LSD1-66hr_NLS-66hr		4	4	4	15.7	15.7	15.7	60.914	0	16.522	11721000	23	3	3	4	0	0	0	0.0150886	0.0131282	2.13317	0.810027	0.0307391	0.0188343	1.84274	0.693887	8.8e-05	0.00209524	2.16481
19.5988	22.5333	20.7796	20.9098	21.0088	20.4375	21.2989	21.5777	21.9742	21.743	21.5823	21.6096				+	LSD1-0hr_NLS-0hr	+	LSD1-24hr_NLS-24hr	+	LSD1-66hr_NLS-66hr		2	2	2	7.1	7.1	7.1	50.656	0	4.7158	29755000	24	4	4	4	3	4	4	0.0137663	0.0129076	2.08733	0.800841	9.44e-05	0.00135211	2.70284	1.17793	8.41e-07	0.000852459	2.37471
20.2877	20.1703	19.9156	19.9459	20.3101	20.1581	20.8423	20.3962	21.2302	20.1825	22.1301	21.2185				+	LSD1-0hr_NLS-0hr	+	LSD1-24hr_NLS-24hr	+	LSD1-66hr_NLS-66hr		9	9	9	4.7	4.7	4.7	307.46	0	20.769	21179000	19	4	4	4	0	2	0	0.0127845	0.0129431	2.0519	0.793524	0.0294971	0.0312558	1.55644	0.610922	0.000531309	0.000945455	2.93811
22.1886	21.3376	21.8191	22.2302	22.1174	21.7675	22.1916	21.9985	22.4041	22.2155	22.6186	22.7307				+	LSD1-0hr_NLS-0hr	+	LSD1-24hr_NLS-24hr				16	16	16	33.1	33.1	33.1	94.044	0	101.6	63697000	95	4	4	4	3	4	4	0.0698686	0.0130968	2.47038	0.791365	2.36e-05	0.019914	1.43873	0.677678	0.00101718	0.0808754	1.02149
23.3376	23.7895	24.3975	24.4362	23.5869	22.8307	23.5165	24.0772	23.1426	22.6186	23.4041	23.1886				+	LSD1-0hr_NLS-0hr	+	LSD1-24hr_NLS-24hr	+	LSD1-66hr_NLS-66hr		14	8	8	24.6	15.7	15.7	82.251	0	26.009	189480000	33	4	4	4	3	2	1	0.0788833	0.013625	2.46429	0.778498	0.0151614	0.00123077	3.3494	1.11804	0.0257557	0.000928571	3.9664
25.0105	24.8142	25.4488	24.8904	25.1527	25.2856	25.2607	25.4551	24.5926	24.6264	25.217	24.9316				+	LSD1-0hr_NLS-0hr	+	LSD1-24hr_NLS-24hr	+	LSD1-66hr_NLS-66hr		22	22	22	55.5	55.5	55.5	61.361	0	227.96	435240000	249	4	4	4	4	4	4	9.59e-05	0.0149457	1.68093	0.769765	2.22e-06	0.00223853	1.93971	0.918993	0.000484124	0.00438461	1.97633
29.7373	29.2736	29.5609	29.8157	29.651	29.7565	29.6389	29.9259	30.0084	29.9117	30.362	30.1724				+	LSD1-0hr_NLS-0hr	+	LSD1-24hr_NLS-24hr	+	LSD1-66hr_NLS-66hr		104	104	2	58.3	58.3	1.3	216.37	0	323.31	11478000000	1879	4	4	4	4	4	4	4.73e-05	0.0151145	1.65345	0.765625	3.95e-06	0.00416949	1.85856	0.87793	0.000128001	0.00256522	2.03698
21.6276	21.8576	21.6886	22.7975	20.417	20.3538	20.4476	21.6141	21.7995	21.2707	21.7995	22.1856				+	LSD1-0hr_NLS-0hr	+	LSD1-24hr_NLS-24hr	+	LSD1-66hr_NLS-66hr		10	10	10	12.8	12.8	12.8	192.63	0	29.962	39765000	27	4	4	4	4	0	2	0.00263356	0.015194	1.80398	0.762454	0.000314015	0.00131507	2.7779	1.16932	0.0118708	0.00217284	2.72131
20.9951	21.265	21.3962	21.632	20.7796	21.0224	20.6453	21.6886	20.1206	20.1332	20.417	20.9459				+	LSD1-0hr_NLS-0hr	+	LSD1-24hr_NLS-24hr	+	LSD1-66hr_NLS-66hr		9	9	9	10.5	10.5	10.5	140.94	0	97.133	24008000	29	4	4	4	4	1	0	0.000331534	0.0177714	1.65465	0.743329	0.00240745	0.00970213	1.86139	0.785099	0.00155228	0.0172129	1.65908
25.317	24.8717	24.6153	25.4707	24.8288	24.6811	24.5754	25.1833	25.8834	25.6568	25.7182	25.7466				+	LSD1-0hr_NLS-0hr	+	LSD1-24hr_NLS-24hr	+	LSD1-66hr_NLS-66hr		28	28	28	44.8	44.8	44.8	87.56	0	274.11	496340000	303	4	4	4	4	4	4	0.000960542	0.0186111	1.68736	0.739745	0.00296791	0.0324664	1.37548	0.601718	8.61e-05	0.0125191	1.70872
20.1946	18.5884	20.9459	21.3592	20.2185	20.4476	18.5888	20.2764	20.9601	20.6096	21.0625	20.5731				+	LSD1-0hr_NLS-0hr	+	LSD1-24hr_NLS-24hr	+	LSD1-66hr_NLS-66hr		9	1	1	45.3	5.6	5.6	34.357	0.0051282	2.8478	14745000	15	3	3	4	0	0	0	0.0464438	0.0203158	2.05087	0.727282	0.0226271	0.0110423	2.09059	0.778231	0.000574754	0.000764706	2.56222
25.4425	25.6292	25.0854	24.4614	26.2151	26.5463	25.2499	25.5165	28.9146	28.2935	28.4354	28.8564				+	LSD1-0hr_NLS-0hr	+	LSD1-24hr_NLS-24hr			+	25	25	2	62.3	62.3	10.7	57.648	0	323.31	2330900000	383	4	4	4	4	4	4	0.00283481	0.0200519	1.69092	0.720083	0.0179206	0.03563	1.45646	0.594238	0.0191206	0.197516	0.682065
23.5045	23.4676	23.654	23.4041	23.5869	23.1596	23.3239	23.6865	22.8783	23.1316	23.391	23.1931				+	LSD1-0hr_NLS-0hr	+	LSD1-24hr_NLS-24hr	+	LSD1-66hr_NLS-66hr		14	14	14	31.8	31.8	31.8	106.32	0	167.96	139470000	183	4	4	4	4	4	4	7.39e-06	0.020671	1.51053	0.717311	0.000304673	0.0304299	1.33303	0.611686	0.00122712	0.00207059	2.32675
20.3211	21.002	20.7634	20.2877	20.3645	20.6453	20.9672	20.2877	18.2241	20.1332	20.3752	17.9014				+	LSD1-0hr_NLS-0hr	+	LSD1-24hr_NLS-24hr				6	6	6	16.4	16.4	16.4	61.207	0	13.365	20647000	9	4	4	2	1	0	1	0.0336218	0.0205385	1.94227	0.717182	4.63e-05	0.0012	2.50268	1.11695	0.585935	0.401358	0.510222
22.3805	23.1565	20.7553	20.8802	21.3156	22.1174	18.3957	20.5638	21.823	22.1488	18.2574	21.68				+	LSD1-0hr_NLS-0hr						4	4	0	38.9	38.9	0	16.502	0	17.43	50856000	26	4	3	3	2	4	4	0.111444	0.0207898	2.29168	0.70977	0.704347	0.500733	-0.320227	-0.114187	0.468126	0.258584	-0.782272
19.8284	20.2764	20.2066	20.1206	20.343	20.3645	19.8847	20.5165	20.8876	20.7307	20.2877	21.0691				+	LSD1-0hr_NLS-0hr						6	6	6	20.7	20.7	20.7	57.788	0	12.276	19747000	14	4	4	4	1	2	4	0.00425346	0.0216962	1.6737	0.704796	0.126694	0.0578912	1.42777	0.508912	0.0581435	0.269573	0.561631
21.3592	21.5356	21.1395	21.8423	21.5404	20.5915	20.8034	21.8073	19.5049	19.3879	20.4874	19.8876				+	LSD1-0hr_NLS-0hr	+	LSD1-24hr_NLS-24hr			+	3	3	3	11.6	11.6	11.6	52.685	0	14.21	27064000	45	4	4	4	4	4	4	0.00752467	0.02175	1.70939	0.702702	0.00925559	0.014879	1.80321	0.72771	0.0067128	0.0618797	1.16349
22.5285	22.0951	22.1332	22.5823	22.1856	21.5961	21.4972	22.2448	24.3778	24.1795	23.391	23.6096				+	LSD1-0hr_NLS-0hr					+	16	16	15	35.8	35.8	33.9	53.687	0	44.638	110130000	87	4	4	4	4	4	4	0.00717111	0.0233171	1.68256	0.694894	0.0678586	0.0760882	1.14943	0.456681	0.0412771	0.160609	0.795845
22.4144	22.3266	22.6453	22.5983	22.1301	22.1976	22.4451	22.6298	21.7755	22.1642	22.4923	22.4898				+	LSD1-0hr_NLS-0hr	+	LSD1-24hr_NLS-24hr	+	LSD1-66hr_NLS-66hr		10	10	10	16.5	16.5	16.5	103.71	0	57.995	71441000	61	4	4	4	4	4	4	0.000113009	0.0233494	1.50247	0.692682	0.000424431	0.0226804	1.45702	0.659813	0.00439359	0.0252356	1.50327
21.0951	21.0292	20.1825	20.6006	19.9601	17.7	20.0691	21.0426	21.2185	20.5731	20.3752	21.7995				+	LSD1-0hr_NLS-0hr						17	17	17	16	16	16	177.19	0	92.981	32344000	40	4	3	4	2	3	4	0.0284212	0.0262754	1.78767	0.681576	0.625548	0.414541	0.421453	0.149464	0.175209	0.151453	-0.929275
20.6971	19.9459	21.5685	21.3156	17.1957	17.9763	19.2832	16.8534	18.2236	17.2924	18.4513	17.4375				+	LSD1-0hr_NLS-0hr					+	5	5	5	18.2	18.2	18.2	52.576	0	16.468	9796700	14	4	1	0	4	0	0	0.00473098	0.0278817	1.59572	0.674623	0.796799	0.7	-0.16179	-0.0622025	1	1	0
20.2066	17.9764	20.3645	20.6886	20.2535	16.7944	18.5025	18.3678	20.5165	21.2821	19.7651	20.714				+	LSD1-0hr_NLS-0hr					+	4	4	4	11	11	11	73.963	0	20.417	20064000	22	3	1	4	0	2	4	0.0461662	0.0323978	1.7685	0.653602	0.888458	0.787506	-0.121433	-0.0429109	0.84995	0.828241	-0.116729
20.5545	23.5638	19.6645	20.0559	20.1206	21.4221	18.124	20.2185	19.2832	19.9243	19.3624	17.4169				+	LSD1-0hr_NLS-0hr			+	LSD1-66hr_NLS-66hr		7	7	5	23.7	23.7	16.3	46.582	0	76.073	26926000	43	4	3	3	2	4	4	0.133587	0.0342105	2.02022	0.638307	0.58498	0.382211	-0.462814	-0.165159	0.0191043	0.0156735	-1.91421
20.4775	19.3268	19.901	19.2967	21.1825	21.2707	19.7207	19.692	24.141	23.8858	23.9043	24.2821				+	LSD1-0hr_NLS-0hr					+	21	5	5	54.3	15.2	15.2	57.999	0	75.48	91402000	49	3	4	4	0	3	4	0.00784691	0.04106	1.45298	0.612778	0.0692231	0.0578712	1.32118	0.508528	0.00119918	0.238985	0.583687
19.4476	20.5915	19.2787	18.6813	19.6714	19.2442	19.3079	17.6853	20.0156	20.4375	17.4163	20.3321				+	LSD1-0hr_NLS-0hr						4	4	4	22.2	22.2	22.2	16.317	0	5.7516	13579000	12	3	3	3	0	3	3	0.0195851	0.0466977	1.45579	0.591591	0.72792	0.647799	-0.1877	-0.0746376	0.877959	0.802155	-0.15993
20.6971	20.8802	21.3101	21.2764	20.7223	20.3962	19.8742	18.4388	20.8727	22.0854	20.7955	21.5261				+	LSD1-0hr_NLS-0hr						7	7	7	26	26	26	39.638	0	13.634	31044000	44	4	3	4	3	3	3	0.0389117	0.0476682	1.51746	0.588994	0.985883	0.976688	0.0130634	0.0048235	0.378883	0.195331	0.924422
21.4324	20.5731	21.9388	22.0724	22.4221	22.002	22.5615	22.9424	22.5938	22.5451	22.9864	22.9968				+	LSD1-0hr_NLS-0hr	+	LSD1-24hr_NLS-24hr	+	LSD1-66hr_NLS-66hr		10	10	10	25.9	25.9	25.9	65.475	0	52.542	71560000	68	4	4	4	4	4	4	0.0084525	0.0481284	1.38872	0.588283	0.000957685	0.0321106	1.35336	0.608182	0.0017389	0.0121151	1.79252
21.9388	22.3619	21.6364	22.8346	21.3211	19.5489	19.7553	21.7013	22.1206	21.1395	21.1642	20.8802				+	LSD1-0hr_NLS-0hr						18	18	18	18.2	18.2	18.2	215.68	0	48.997	47213000	73	4	4	4	4	4	4	0.0335679	0.0479087	1.49481	0.587397	0.841247	0.746219	-0.140197	-0.0525024	0.0759257	0.235502	0.645323
21.632	22.5708	20.1206	20.7796	20.9951	21.5165	20.9531	20.2535	20.6096	20.5823	20.1457	20.6714				+	LSD1-0hr_NLS-0hr						6	6	6	26.3	26.3	26.3	36.511	0	19.24	34015000	25	4	4	4	3	4	4	0.0689634	0.0479273	1.5941	0.585917	0.129018	0.267148	0.574393	0.246893	0.0785176	0.157639	-0.834569
21.9601	21.4066	21.0821	21.002	21.3752	21.9424	20.7876	20.9098	21.3857	21.5777	21.3156	20.9388				+	LSD1-0hr_NLS-0hr			+	LSD1-66hr_NLS-66hr		3	3	3	23.3	23.3	23.3	24.838	0	9.3413	38316000	30	4	4	4	2	3	1	0.153698	0.04992	1.79115	0.578313	0.232311	0.137701	0.98539	0.359403	0.0184269	0.00456	2.39614
19.2809	18.1521	19.9459	19.3145	20.2066	19.29	19.2232	19.8097	20.3857	20.0426	20.4775	18.1414						+	LSD1-24hr_NLS-24hr	+	LSD1-66hr_NLS-66hr		2	2	2	7	7	7	25.548	0	60.027	9353800	14	3	4	3	0	0	0	0.0177293	0.0517241	1.3882	0.571579	0.00492241	0.0108889	1.87209	0.7697	0.0323534	0.0193865	1.8795
21.3484	20.5451	21.1765	21.4066	21.4221	20.6714	20.9388	22.1519	20.1457	17.7685	20.2066	20.1946						+	LSD1-24hr_NLS-24hr			+	9	9	9	15.7	15.7	15.7	132.4	0	36.075	30034000	18	4	4	3	3	4	2	0.0383128	0.05736	1.40543	0.555184	0.0144131	0.0489781	1.26743	0.534269	0.891242	0.85961	-0.104124
20.0292	20.0426	20.1457	20.2989	20.2066	19.7683	17.4652	21.5685	21.7755	21.7223	22.2332	22.1765								+	LSD1-66hr_NLS-66hr	+	8	8	8	18.1	18.1	18.1	68.844	0	39.215	26806000	23	4	3	4	3	4	3	0.000402389	0.0578039	1.19251	0.549858	0.602099	0.382205	0.471596	0.165052	7.82e-06	0.000684211	2.18571
20.1206	20.1457	21.0292	20.5823	20.3101	19.6258	20.2185	20.4676	20.0156	19.5508	20.5915	20.4375						+	LSD1-24hr_NLS-24hr	+	LSD1-66hr_NLS-66hr		7	7	7	15.1	15.1	15.1	81.951	0	27.161	16700000	18	4	4	4	3	3	1	0.00782504	0.0641992	1.24608	0.537548	0.054903	0.0287925	1.6738	0.619052	0.010439	0.0223409	1.62496
22.8461	23.0559	23.3101	22.976	23.2535	23.0983	23.0951	23.3101	22.6757	22.7594	23.2288	23.141						+	LSD1-24hr_NLS-24hr	+	LSD1-66hr_NLS-66hr		17	17	17	25.8	25.8	25.8	118.14	0	47.828	115310000	122	4	4	4	4	4	4	8.08e-05	0.0639542	1.13978	0.537415	5.15e-06	0.0125298	1.57398	0.748205	0.000378224	0.0104274	1.85198
21.6231	21.6453	21.9171	21.4221	21.5165	21.6584	21.3045	21.928	20.9812	20.8651	21.3376	21.7512						+	LSD1-24hr_NLS-24hr	+	LSD1-66hr_NLS-66hr		6	6	4	14.5	14.5	11.5	62.597	0	31.774	37676000	39	4	4	4	4	4	0	0.000884631	0.065806	1.16768	0.532837	4.48e-05	0.0163832	1.51743	0.707402	0.000173376	0.0012381	3.51071
21.654	21.2821	20.9243	20.5165	21.0359	18.2297	21.1457	21.3805	22.3457	22.0393	21.5069	18.2947								+	LSD1-66hr_NLS-66hr		8	8	8	32	32	32	46.374	0	27.694	36033000	35	4	3	3	3	4	1	0.0390427	0.0652059	1.32989	0.530768	0.76241	0.590883	-0.250105	-0.0896291	0.0475291	0.00447059	2.65431
21.1946	20.9243	21.1395	21.2419	21.0951	21.1206	20.9812	20.6886	21.8576	22.2096	21.9388	21.5777								+	LSD1-66hr_NLS-66hr		11	11	9	9.4	9.4	7.5	184.85	0	44.588	37962000	46	4	4	4	3	4	4	0.0503489	0.064967	1.35616	0.530705	0.1229	0.241606	0.622168	0.265122	0.00308358	0.0291542	1.41377
22.3321	17.6853	17.2302	22.2905	23.1976	23.2535	23.2535	23.3511	22.9116	23.391	22.8614	24.1253						+	LSD1-24hr_NLS-24hr	+	LSD1-66hr_NLS-66hr	+	7	7	6	25.5	25.5	23.2	63.078	0	17.018	129920000	14	2	4	4	0	3	2	0.273299	0.0746942	1.74855	0.5068	0.0789324	0.0188444	2.02842	0.685391	0.0908163	0.00658182	2.91011
25.3612	24.867	24.7234	25.317	25.0233	24.7746	24.8811	25.1984	25.3273	25.1681	25.4862	25.5638								+	LSD1-66hr_NLS-66hr		8	8	6	43.7	43.7	28.4	20.811	0	129.41	501010000	199	4	4	4	4	4	4	0.00372746	0.0783545	1.1163	0.497649	0.000173255	0.0574658	1.08832	0.510431	1.82e-05	0.0204819	1.47087
25.8623	25.7338	26.3811	26.1035	25.5195	25.3712	25.9225	25.9584	25.2133	25.2317	25.8858	25.6998						+	LSD1-24hr_NLS-24hr	+	LSD1-66hr_NLS-66hr		64	64	1	40.7	40.7	0.5	270.78	0	323.31	804160000	750	4	4	4	4	4	4	0.00129024	0.0889075	1.01973	0.467828	0.00142797	0.04896	1.18125	0.533942	0.00345015	0.0481992	1.2418
23.8288	23.4551	23.9406	24.1174	23.7796	23.6649	23.7695	24.1795	23.654	23.654	23.6971	23.6971								+	LSD1-66hr_NLS-66hr		17	17	17	29.6	29.6	29.6	116.66	0	98.95	201230000	236	4	4	4	4	4	4	0.00066505	0.0907942	0.993752	0.461269	0.000981998	0.0647365	1.06434	0.48868	0.000173408	0.0388899	1.22148
26.9202	26.3359	27.0813	26.8973	26.8504	26.9428	26.9869	26.9316	26.2661	26.2317	26.5165	26.2696						+	LSD1-24hr_NLS-24hr				101	101	101	47.5	47.5	47.5	341.12	0	323.31	1583400000	1329	4	4	4	4	4	4	0.00102531	0.0915	0.991053	0.457315	1.12e-05	0.0455814	1.151	0.551615	0.000182965	0.124844	0.823567
25.0691	24.8093	25.341	25.3443	25.2821	24.8717	25.5195	25.9738	25.3811	25.0608	25.8215	25.6431						+	LSD1-24hr_NLS-24hr	+	LSD1-66hr_NLS-66hr		31	31	31	34.7	34.7	34.7	151.12	0	301.39	615500000	450	4	4	4	4	4	4	0.000594933	0.0918414	0.980958	0.456417	0.00276699	0.0466767	1.22338	0.543554	0.00163344	0.0330791	1.32836
24.9977	24.4298	24.976	25.1984	24.5463	24.6649	25.0975	24.9933	23.5045	23.2821	23.895	23.6209								+	LSD1-66hr_NLS-66hr	+	19	19	19	62.8	62.8	62.8	56.536	0	106.52	350450000	273	4	4	4	4	4	4	0.00175495	0.0953404	0.968114	0.443851	0.000334033	0.0694186	1.00833	0.471645	0.000918398	0.0248511	1.44476
21.8802	21.5731	21.8269	21.8987	21.7265	21.2707	21.4476	21.9777	21.4425	21.1395	18.6217	21.3538						+	LSD1-24hr_NLS-24hr				6	6	6	28.8	28.8	28.8	35.166	0	16.982	46153000	60	4	4	3	3	3	4	0.186508	0.107941	1.17059	0.420319	0.179903	0.0475655	1.68752	0.542271	0.684953	0.589416	-0.295815
21.0156	20.3538	20.8499	20.2989	20.002	19.9287	20.0559	20.2535	18.5584	18.4473	19.4375	20.6911								+	LSD1-66hr_NLS-66hr		7	7	7	9.7	9.7	9.7	118.03	0	14.459	17517000	11	4	4	1	3	3	0	0.168282	0.110052	1.11849	0.412115	0.36206	0.330274	0.483028	0.194009	0.0290357	0.0246703	1.68006
29.8843	29.5609	30.3303	30.2422	29.4823	29.3951	29.7031	29.7927	28.0864	28.2308	28.7486	28.3869								+	LSD1-66hr_NLS-66hr	+	105	105	83	48.6	48.6	38.7	281.59	0	323.31	10661000000	2205	4	4	4	4	4	4	0.00343397	0.112305	0.893778	0.407854	0.000388945	0.0555088	1.11343	0.516294	0.000639545	0.0188679	1.58429
18.1015	18.4516	19.9083	18.3495	20.7389	18.9882	19.4736	19.2454	18.6971	19.7651	19.5676	19.9316						+	LSD1-24hr_NLS-24hr				2	2	2	34.6	34.6	34.6	8.9723	0	7.163	8532500	17	2	3	4	0	1	2	0.11254	0.115448	1.02941	0.403051	0.0349448	0.0466061	1.36416	0.545066	0.118693	0.261815	0.597378
18.8787	18.2587	19.9054	18.9344	19.3012	17.8762	23.0376	20.7634	19.3709	18.1998	20.1703	20.0292						+	LSD1-24hr_NLS-24hr	+	LSD1-66hr_NLS-66hr		56	1	1	57.7	3.2	3.2	112.26	0	6.2524	17486000	16	3	3	3	0	1	1	0.0410691	0.121241	0.932827	0.395298	0.109933	0.0196087	2.12673	0.678528	0.0354037	0.0474477	1.38147
20.2535	20.3538	20.2185	19.9258	20.0821	20.2066	19.7683	20.2989	17.6414	17.6734	17.2255	19.0315						+	LSD1-24hr_NLS-24hr	+	LSD1-66hr_NLS-66hr	+	4	4	4	11.7	11.7	11.7	71.3	0	9.2049	13968000	19	4	4	0	3	1	3	0.109234	0.128918	0.968938	0.385182	0.0144044	0.0217778	1.66614	0.669319	0.00761519	0.0225537	-1.595
21.2244	20.3752	21.6409	21.0886	21.3962	21.4626	21.2933	21.68	20.9951	20.5451	20.8727	21.1269						+	LSD1-24hr_NLS-24hr				5	5	5	13.4	13.4	13.4	71.021	0	18.438	33564000	33	4	4	4	4	4	4	0.0561059	0.151161	0.84583	0.358699	0.000269837	0.0431004	1.21596	0.562954	0.0106458	0.0875584	1.05145
25.0275	24.5522	25.1293	25.8834	23.2155	22.6518	23.5869	24.0772	21.5685	19.7553	21.2535	20.6006								+	LSD1-66hr_NLS-66hr	+	38	38	38	30.7	30.7	30.7	222.94	0	262.54	263310000	223	4	4	4	4	4	4	0.064775	0.151361	0.850327	0.35778	0.396436	0.445896	0.313539	0.133796	0.020357	0.0302415	1.50176
23.6757	23.6865	23.4551	24.141	23.3376	23.0575	23.3376	23.5522	23.867	23.6757	24.1253	23.7492								+	LSD1-66hr_NLS-66hr		34	34	34	22	22	22	282.71	0	141.17	191670000	241	4	4	4	4	4	4	0.0231024	0.169791	0.749182	0.333375	0.0633951	0.284746	0.51393	0.230867	0.000130743	0.0248043	1.40691
18.3365	18.0862	17.8879	18.3451	19.2232	17.5582	18.562	19.3233	22.6051	20.5731	22.3045	22.6907								+	LSD1-66hr_NLS-66hr	+	16	16	16	5.5	5.5	5.5	504.74	0	42.651	20567000	36	1	4	4	0	1	4	0.0200164	0.171366	0.741953	0.331801	0.607298	0.44758	0.352246	0.132932	0.0103145	0.00883478	2.13639
21.002	20.4972	20.343	20.4273	20.4576	20.8034	20.2764	19.7455	20.0426	20.5638	19.6766	19.7569						+	LSD1-24hr_NLS-24hr				4	4	4	57	57	57	10.214	0	7.6235	21718000	31	4	4	4	3	2	3	0.237604	0.1846	0.828263	0.314751	0.0526905	0.0369322	1.53901	0.583174	0.408578	0.280321	0.66024
23.6209	22.8288	23.976	23.6865	23.5045	23.1991	23.3645	23.6865	25.0401	24.7389	25.6458	25.7796						+	LSD1-24hr_NLS-24hr	+	LSD1-66hr_NLS-66hr	+	20	20	20	38.6	38.6	38.6	74.049	0	181.47	281680000	257	4	4	4	4	4	4	0.0680221	0.218589	0.650462	0.283703	0.000118911	0.0256884	1.39153	0.644823	0.00171444	0.0107119	1.93043
20.1825	17.5864	18.1762	18.4112	19.8847	20.1703	18.4785	18.161	20.5165	21.5685	20.895	21.2477								+	LSD1-66hr_NLS-66hr	+	5	5	5	19.5	19.5	19.5	46.852	0	13.542	15280000	10	1	2	4	0	0	2	0.310216	0.227374	0.736186	0.276313	0.129558	0.132286	0.921066	0.36486	0.0574978	0.0261633	1.73367
21.9316	20.8876	22.3725	21.9134	21.8876	21.7471	22.2096	22.3752	21.4874	21.0292	22.2764	21.9243						+	LSD1-24hr_NLS-24hr				9	9	9	9.4	9.4	9.4	211.87	0	31.008	60071000	56	4	4	4	4	4	4	0.104613	0.235029	0.625442	0.268736	0.000474508	0.0483852	1.16471	0.536751	0.111385	0.199279	0.735571
18.5805	18.9771	18.4375	18.8331	18.6311	21.0088	18.6558	20.6364	18.0319	18.7891	18.3277	18.6731						+	LSD1-24hr_NLS-24hr				2	2	2	19.4	19.4	19.4	18.885	0.0035828	2.9558	8727400	6	3	4	4	2	3	4	0.199505	0.254539	0.62055	0.255322	0.0674815	0.0416585	1.52223	0.567291	0.832122	0.920865	-0.0524483
20.654	20.5731	20.8876	21.2419	20.9601	20.8576	21.8987	21.7348	20.4676	20.0292	20.9672	20.5165								+	LSD1-66hr_NLS-66hr		9	9	9	9.8	9.8	9.8	151.82	0	36.537	30692000	28	4	4	4	4	4	1	0.0604254	0.29654	0.508604	0.229064	0.00969048	0.0556667	1.19281	0.514264	0.00830907	0.00265168	2.42709
22.5983	22.5237	23.3376	22.7161	23.211	23.4298	23.7389	23.6757	22.9006	23.0526	23.5638	23.6757								+	LSD1-66hr_NLS-66hr		26	26	10	19.2	19.2	6.2	258.13	0	120.82	152950000	179	4	4	4	4	4	4	0.0538761	0.315499	0.467973	0.213138	0.0144793	0.123155	0.852783	0.378888	0.017436	0.0433729	1.33886
18.1511	19.4894	21.1765	19.9882	20.3211	19.8787	20.1825	20.3211	21.3484	21.265	21.8764	20.9316								+	LSD1-66hr_NLS-66hr		7	7	7	8	8	8	171.75	0	17.482	23646000	22	3	4	4	3	4	3	0.431421	0.320539	0.558395	0.209749	0.000385611	0.10568	0.860854	0.405895	0.00548435	0.0233846	1.55018
24.7543	25.4105	25.002	25.3943	25.0813	25.4707	24.918	24.3844	25.0854	24.7995	24.6376	24.3712						+	LSD1-24hr_NLS-24hr				4	4	1	28.5	28.5	5.2	30.2	0	9.0046	426080000	46	4	4	4	4	3	3	0.16543	0.34491	0.44904	0.196568	0.28222	0.0423548	2.16184	0.564417	0.361121	0.0821733	1.77741
18.5928	17.9552	20.0292	17.8401	19.4293	17.7023	19.853	20.002	17.5553	18.9507	16.7129	18.6951						+	LSD1-24hr_NLS-24hr				2	2	2	2.7	2.7	2.7	120.23	0.0035814	2.9458	6689100	6	1	3	0	0	0	0	0.459754	0.377645	0.459252	0.177899	0.046909	0.0245888	1.75268	0.648475	1	1	0
21.5498	21.2361	21.9024	21.7265	21.1765	21.0821	20.6627	21.2707	21.7915	21.8113	22.1519	22.1143								+	LSD1-66hr_NLS-66hr		7	7	7	23.3	23.3	23.3	47.807	0	39.922	44677000	46	4	4	4	4	4	4	0.0671534	0.377666	0.385068	0.17724	0.00330243	0.0931841	0.931191	0.423686	0.000393738	0.0105172	1.86412
20.8727	21.0493	20.895	21.502	20.8191	20.5069	20.5545	20.9316	20.5638	20.4066	20.6276	20.714								+	LSD1-66hr_NLS-66hr		7	7	7	33.4	33.4	33.4	45.23	0	21.255	29270000	25	4	4	4	4	3	1	0.124399	0.381959	0.385803	0.174094	0.22649	0.174458	0.836063	0.31905	0.0135269	0.00646429	2.22534
18.1994	17.9826	18.1801	19.1079	22.976	22.5545	22.9777	23.7182	22.9812	22.7307	22.9261	23.391						+	LSD1-24hr_NLS-24hr	+	LSD1-66hr_NLS-66hr	+	19	19	19	31	31	31	126.34	0	62.839	63138000	88	4	4	4	0	4	4	0.486495	0.386486	0.447165	0.171775	7.25e-06	0	3.86724	1.7036	5.48e-07	0	4.64309
20.714	21.265	20.7715	21.3156	21.3101	20.2535	20.9742	21.5069	21.8307	21.0625	21.6186	21.9601						+	LSD1-24hr_NLS-24hr	+	LSD1-66hr_NLS-66hr		6	6	6	24	24	24	49.536	0	10.392	34563000	32	4	4	4	4	4	0	0.159201	0.447658	0.321964	0.146323	0.0336435	0.0380921	1.4706	0.57982	0.000202687	0.00118182	3.42957
26.228	26.019	26.2803	26.4754	25.8973	25.6865	26.1852	26.4536	22.9406	23.1856	23.3645	23.5045								+	LSD1-66hr_NLS-66hr	+	54	54	54	43.1	43.1	43.1	213.01	0	323.31	867930000	612	4	4	4	4	4	4	0.0734315	0.477243	0.287148	0.13465	0.00495158	0.139235	0.777082	0.356518	0.047364	0.0124741	2.25957
21.3156	21.6714	21.8461	21.0559	20.4874	21.0559	21.3484	20.3857	21.0224	21.9916	20.5545	20.9316						+	LSD1-24hr_NLS-24hr				8	8	8	3.2	3.2	3.2	499.1	0	16.808	34104000	33	4	4	4	4	3	3	0.456404	0.485237	0.31416	0.131189	0.0182703	0.02576	1.60977	0.643694	0.0650608	0.0639251	1.30243
19.3365	19.1675	17.3513	17.6985	18.5673	17.6936	19.7731	19.5601	19.2832	18.8489	19.3516	19.1382								+	LSD1-66hr_NLS-66hr		3	3	3	4.3	4.3	4.3	164.39	0	5.5805	6232100	12	1	2	3	0	0	1	0.604895	0.493926	0.337145	0.128793	0.279855	0.273828	0.602576	0.240322	0.0223436	0.0484	1.33668
20.8113	20.4273	20.7634	20.3962	20.5165	20.7471	20.2877	20.1825	20.7307	20.654	20.5261	20.4273								+	LSD1-66hr_NLS-66hr		4	4	4	30.6	30.6	30.6	17.66	0	44.794	23627000	24	4	4	4	4	4	1	0.515781	0.795022	0.103731	0.0482412	0.164016	0.467942	0.272701	0.125551	0.0138209	0.0166093	1.85153
19.5088	19.6954	18.3988	17.1787	19.6204	19.6078	19.7812	19.9112	16.4248	17.5751	19.1155	19.4066						+	LSD1-24hr_NLS-24hr				4	4	4	6.7	6.7	6.7	119.73	0	8.1381	9580300	6	2	4	2	1	1	0	0.892954	0.831497	0.1097	0.0394397	0.0833309	0.0487826	1.43587	0.533375	0.714922	0.611854	0.276193
20.9531	20.3752	20.654	20.9171	20.417	20.2185	20.0821	20.0691	18.3123	16.9733	17.8948	17.1273						+	LSD1-24hr_NLS-24hr			+	4	4	4	16.5	16.5	16.5	38.216	0	35.136	16094000	25	4	4	0	4	1	0	0.900258	0.946826	0.0301294	0.0135082	0.00666596	0.00643902	2.14415	0.848033	1	1	0
19.7439	18.8947	17.6644	18.0354	20.3857	20.1946	21.3101	20.7876	20.1703	18.4875	19.9068	20.5356								+	LSD1-66hr_NLS-66hr	+	5	5	5	21.7	21.7	21.7	44.363	0	13.342	18129000	12	1	4	3	0	3	0	0.996714	0.995343	0.00223923	0.000887984	0.0726579	0.134159	0.870794	0.362749	0.0277733	0.0358739	1.45027
17.9773	18.9724	19.0289	17.5578	21.2593	21.0821	18.6105	21.2764	21.4775	21.5165	21.4626	21.2244						+	LSD1-24hr_NLS-24hr	+	LSD1-66hr_NLS-66hr	+	4	4	2	8.5	8.5	5.6	95.222	0	5.5579	39471000	11	0	3	4	0	1	1	1	1	0	0	0.126718	0.0168605	2.32173	0.701428	0.0384478	0.0127576	2.21633
17.8198	18.1461	18.0452	17.6986	18.4402	18.321	18.3522	19.9127	19.4129	19.6042	20.002	19.5878								+	LSD1-66hr_NLS-66hr	+	3	3	3	3.2	3.2	3.2	109.85	0	4.3995	4292300	5	0	1	4	0	0	0	1	1	0	0	0.0819035	0.104038	1.01407	0.407942	0.000409702	0.00451485	1.97578
18.1743	17.8424	17.7821	17.4585	19.4354	17.9918	19.4933	19.7106	21.4324	20.0691	21.1015	21.7755								+	LSD1-66hr_NLS-66hr	+	8	8	8	9.2	9.2	9.2	144.99	0	15.718	13298000	14	0	3	4	0	1	3	1	1	0	0	0.206446	0.154321	0.875954	0.334528	0.0199839	0.0300971	1.50864
17.6174	18.1355	17.7286	18.8795	19.5582	19.0506	17.3351	19.4375	21.68	22.1488	21.6584	21.9171								+	LSD1-66hr_NLS-66hr	+	5	5	5	10.7	10.7	10.7	102.14	0	30.948	14031000	17	0	3	4	0	0	3	1	1	0	0	0.988572	0.982431	0.00971413	0.0036648	0.000281636	0.00106122	3.10129
16.9395	18.9755	18.2324	18.6894	17.6825	18.0503	18.0289	18.9024	20.4066	19.8081	20.5731	21.0493								+	LSD1-66hr_NLS-66hr	+	4	4	2	5.2	5.2	3.3	117.99	0	26.436	5083700	8	0	0	4	0	0	0	1	1	0	0	1	1	0	0	0.00177293	0.00204651	2.34713
16.9944	18.8042	18.4945	19.8325	17.8932	17.8582	17.3798	18.7425	21.4375	19.9601	21.9098	20.6186								+	LSD1-66hr_NLS-66hr	+	7	7	7	13.8	13.8	13.8	83.125	0	15.905	8526200	16	0	0	4	0	0	3	1	1	0	0	1	1	0	0	0.00237514	0.00306383	2.19733
18.2051	19.4475	19.4887	17.2292	17.5494	17.6805	19.327	18.5761	20.0691	20.2989	20.0821	20.1079								+	LSD1-66hr_NLS-66hr	+	3	3	3	10.6	10.6	10.6	47.379	0	3.8721	7482000	5	0	0	4	0	0	0	1	1	0	0	1	1	0	0	0.00222705	0.00412245	2.12716
17.0942	18.4794	18.0181	16.388	17.6352	17.7412	17.1634	18.1081	20.2419	19.729	21.0088	21.8152								+	LSD1-66hr_NLS-66hr	+	7	7	6	10.5	10.5	9	118.62	0	36.436	7761600	11	0	0	4	0	0	1	1	1	0	0	1	1	0	0	0.00694011	0.0116562	1.98646
17.0167	18.3642	17.4435	17.1278	17.7241	18.4057	17.7286	18.8361	19.4854	19.6593	20.7634	20.9812								+	LSD1-66hr_NLS-66hr	+	5	4	4	2.3	2	2	406.1	0	9.0165	6231300	9	0	1	4	0	0	1	1	1	0	0	0.374402	0.342459	-0.463915	-0.186796	0.0111777	0.0186582	1.75953
18.0047	17.9321	18.6697	20.4476	19.786	18.3495	20.0292	20.3321	22.654	21.9024	23.2821	22.5356								+	LSD1-66hr_NLS-66hr	+	12	12	12	17.7	17.7	17.7	104.46	0	109.84	32543000	42	3	4	4	3	3	4	0.946199	0.934861	-0.0440331	-0.0167688	0.283425	0.119122	1.13883	0.383858	0.000930142	0.000658228	2.3897
18.3667	18.1106	18.5412	17.2993	21.1765	20.5638	22.0088	22.5846	24.1871	23.8576	24.1946	24.7796						+	LSD1-24hr_NLS-24hr	+	LSD1-66hr_NLS-66hr	+	27	27	27	34.2	34.2	34.2	136.48	0	158.4	79130000	84	1	4	4	0	0	2	0.879283	0.921766	-0.0445409	-0.0195264	0.000390597	0.00218182	3.61796	1.44187	1.29e-06	0	6.34032
20.7389	17.0159	20.5069	21.4375	20.265	20.2419	20.5731	21.9061	22.3805	21.5261	23.1316	22.6453								+	LSD1-66hr_NLS-66hr	+	13	13	13	16.4	16.4	16.4	134.69	0	106.34	45695000	38	3	4	4	4	4	4	0.912744	0.834911	-0.115593	-0.038384	0.451112	0.37349	0.429658	0.16961	0.0203631	0.0316604	1.47727
20.6453	19.9459	17.8153	21.2361	20.1946	17.024	17.8203	22.3321	20.7553	20.4476	21.4972	21.6627								+	LSD1-66hr_NLS-66hr		13	13	13	4.2	4.2	4.2	519.2	0	41.43	31612000	25	3	2	4	3	4	2	0.860875	0.752943	-0.167036	-0.0573397	0.46401	0.203453	-0.942724	-0.294077	0.0341442	0.0231823	1.72552
18.9054	18.0346	17.998	18.2683	18.9431	18.9141	17.2961	18.9112	19.2042	19.2945	19.3941	19.0129								+	LSD1-66hr_NLS-66hr		2	2	2	29.1	29.1	29.1	17.993	0	12.435	6330500	9	1	3	4	3	1	0	0.506622	0.641802	-0.190492	-0.0839249	0.266291	0.269889	0.608611	0.243775	0.00168939	0.0335556	1.32516
19.4576	18.4582	19.9882	19.8682	19.8545	21.3805	21.9243	22.8499	18.6769	17.6481	17.6831	19.5951						+	LSD1-24hr_NLS-24hr			+	7	7	7	68.7	68.7	68.7	20.356	0	35.366	25463000	26	3	4	1	3	3	0	0.691552	0.619585	-0.232522	-0.0908887	0.101525	0.0462222	1.52697	0.547252	0.37619	0.378168	-0.469626
20.5731	19.3277	20.4676	20.3645	20.3538	20.5356	20.1581	20.3211	19.6558	19.6818	19.5337	19.3538								+	LSD1-66hr_NLS-66hr		8	8	8	27.3	27.3	27.3	54.381	0	27.869	19521000	41	4	4	4	4	4	0	0.401903	0.487634	-0.305336	-0.130565	0.157329	0.518506	0.234446	0.109293	0.00681699	0.0312986	1.41002
18.1891	17.9648	19.9054	19.002	17.9573	20.1457	19.7005	20.654	19.3962	19.2137	18.1322	19.002						+	LSD1-24hr_NLS-24hr				4	4	4	3	3	3	260.95	0	11.78	10662000	14	2	3	3	4	0	1	0.379084	0.383506	-0.424136	-0.173347	0.0166359	0.00769925	2.17068	0.816047	0.765676	0.815138	0.11787
17.1854	24.5225	17.7057	17.8926	18.7262	25.1871	25.0772	18.2096	25.7234	25.9202	17.0271	25.5551						+	LSD1-24hr_NLS-24hr	+	LSD1-66hr_NLS-66hr	+	3	3	3	4.8	4.8	4.8	108.49	0.001233	3.4085	550180000	9	1	2	3	2	0	1	0.463342	0.0970131	-2.00445	-0.439611	0.145212	0.00728682	3.27796	0.828082	0.273401	0.01875	3.4021
17.2232	17.0951	17.5819	16.3598	17.3949	17.7359	18.3611	17.9235	21.4775	20.4375	23.4676	23.1673								+	LSD1-66hr_NLS-66hr	+	12	12	12	15.1	15.1	15.1	162.34	0	84.846	24354000	44	3	0	4	0	0	4	0.00961149	0.0683972	-1.20671	-0.519559	1	1	0	0	0.0272053	0.0126617	2.13098
#!{C:Group1}LSD1-0hr	LSD1-0hr	LSD1-0hr	LSD1-0hr	LSD1-24hr	LSD1-24hr	LSD1-24hr	LSD1-24hr	LSD1-66hr	LSD1-66hr	LSD1-66hr	LSD1-66hr
[truncated: 9 more columns]

## Sheet: LSD1 Vs NLS s0 1 sig ANOVA
LFQ intensity LSD1-0hr_B10	LFQ intensity LSD1-0hr_B11	LFQ intensity LSD1-0hr_B8	LFQ intensity LSD1-0hr_B8b	LFQ intensity LSD1-24hr_B10	LFQ intensity LSD1-24hr_B11	LFQ intensity LSD1-24hr_B8	LFQ intensity LSD1-24hr_B8b	LFQ intensity LSD1-66hr_B10	LFQ intensity LSD1-66hr_B11	LFQ intensity LSD1-66hr_B8	LFQ intensity LSD1-66hr_B8b	Only identified by site	Reverse	Potential contaminant	Student's T-test Significant LSD1-0hr_NLS-0hr	Student's T-test significant	Student's T-test Significant LSD1-24hr_NLS-24hr	Student's T-test significant_	Student's T-test Significant LSD1-66hr_NLS-66hr	Student's T-test significant__	ANOVA Significant	Peptides	Razor + unique peptides	Unique peptides	Sequence coverage [%]	Unique + razor sequence coverage [%]	Unique sequence coverage [%]	Mol. weight [kDa]	Q-value	Score	Intensity	MS/MS count	LFQ intensity LSD1-0hr # valid values	LFQ intensity LSD1-24hr # valid values	LFQ intensity LSD1-66hr # valid values	LFQ intensity NLS-0hr # valid values	LFQ intensity NLS-24hr # valid values	LFQ intensity NLS-66hr # valid values	Student's T-test p-value LSD1-0hr_NLS-0hr	Student's T-test q-value LSD1-0hr_NLS-0hr	Student's T-test Difference LSD1-0hr_NLS-0hr	Student's T-test Test statistic LSD1-0hr_NLS-0hr	Student's T-test p-value LSD1-24hr_NLS-24hr	Student's T-test q-value LSD1-24hr_NLS-24hr	Student's T-test Difference LSD1-24hr_NLS-24hr	Student's T-test Test statistic LSD1-24hr_NLS-24hr	Student's T-test p-value LSD1-66hr_NLS-66hr	Student's T-test q-value LSD1-66hr_NLS-66hr	Student's T-test Difference LSD1-66hr_NLS-66hr
#!{Type}E	E	E	E	E	E	E	E	E	E	E	E	C	C	C	C	C	C	C	C	C	C	N	N	N	N	N	N	N	N	N	N	N	N	N	N	N	N	N	N	N	N	N	N	N	N	N	N	N	N
#!{C:Group1}LSD1-0hr	LSD1-0hr	LSD1-0hr	LSD1-0hr	LSD1-24hr	LSD1-24hr	LSD1-24hr	LSD1-24hr	LSD1-66hr	LSD1-66hr	LSD1-66hr	LSD1-66hr
27.9031	27.7645	28.6663	28.3282	27.8564	27.8682	28.0965	28.258	27.9977	28.2262	29.0914	28.4591				+	LSD1-0hr_NLS-0hr	+	LSD1-24hr_NLS-24hr	+	LSD1-66hr_NLS-66hr		34	34	29	78.5	78.5	70.4	52.714	0	323.31	3150700000	463	4	4	4	3	3	4	1.22e-06	0	11.4991	7.21604	1.46e-05	0	10.7651	5.82594	2.71e-07	0	11.5931
28.0557	27.5826	27.8081	28.5898	27.4473	27.1312	27.4234	27.0296	27.7129	27.611	27.217	27.6251				+	LSD1-0hr_NLS-0hr	+	LSD1-24hr_NLS-24hr	+	LSD1-66hr_NLS-66hr		62	62	54	56.6	56.6	49.1	184.15	0	323.31	2012500000	650	4	4	4	4	4	3	1.21e-06	0	10.3906	6.76661	0.000352	0	9.61732	4.13163	4.16e-05	0	7.83911
27.3828	26.5507	27.8799	27.673	27.0711	25.4923	26.5898	26.965	26.1984	25.7234	26.5359	27.1795				+	LSD1-0hr_NLS-0hr	+	LSD1-24hr_NLS-24hr	+	LSD1-66hr_NLS-66hr		30	30	30	47.7	47.7	47.7	70.881	0	323.31	1311200000	290	4	4	4	4	3	2	5.47e-07	0	9.60868	6.70577	5.68e-07	0	8.82467	6.303	3.15e-05	0	7.93522
24.7746	24.2821	24.8044	24.8481	26.0894	25.9825	25.4707	25.5869	26.673	26.2996	26.8504	26.9089				+	LSD1-0hr_NLS-0hr	+	LSD1-24hr_NLS-24hr	+	LSD1-66hr_NLS-66hr	+	39	39	39	50.2	50.2	50.2	97.336	0	323.31	590050000	344	4	4	4	0	1	1	1.61e-08	0	6.94646	5.92049	1.9e-06	0	7.61913	5.35187	6.7e-05	0	8.37915
29.066	29.3992	28.8234	28.604	28.6216	29.0788	29.1263	29.21	28.5165	28.3109	28.2445	28.6527				+	LSD1-0hr_NLS-0hr	+	LSD1-24hr_NLS-24hr	+	LSD1-66hr_NLS-66hr		71	70	70	72.6	71.9	71.9	113.6	0	323.31	4587500000	749	4	4	4	4	4	4	3.25e-06	0	9.09086	5.8515	4.98e-05	0	9.7648	5.00516	1.02e-06	0	10.9408
25.9406	25.3031	26.8264	26.4676	25.705	25.0359	26.2002	26.2785	24.6595	24.8385	25.8069	25.5638				+	LSD1-0hr_NLS-0hr	+	LSD1-24hr_NLS-24hr	+	LSD1-66hr_NLS-66hr		19	19	19	56.5	56.5	56.5	35.869	0	220.24	627370000	165	4	4	4	1	0	0	1.36e-06	0	8.12641	5.69562	4.97e-07	0	8.06937	5.94322	1.41e-05	0	7.15826
30.1115	29.7708	30.5481	30.3828	30.1724	29.6004	30.4532	30.6798	29.6216	29.0349	29.8945	29.6407				+	LSD1-0hr_NLS-0hr	+	LSD1-24hr_NLS-24hr	+	LSD1-66hr_NLS-66hr		69	69	69	68.2	68.2	68.2	136.23	0	323.31	11426000000	1239	4	4	4	4	4	4	7.95e-07	0	7.74437	5.64609	2.12e-06	0	7.65241	5.33912	6.42e-06	0	7.99554
32.3357	31.901	32.4134	32.2019	32.2535	32.0512	32.5822	32.5481	32.08	32.0737	32.4007	32.2591				+	LSD1-0hr_NLS-0hr	+	LSD1-24hr_NLS-24hr	+	LSD1-66hr_NLS-66hr		60	60	60	79.8	79.8	79.8	92.849	0	323.31	50261000000	1682	4	4	4	4	4	4	1.71e-05	0	10.0945	5.5573	2.24e-05	0	9.93399	5.39276	3.69e-05	0	10.4486
32.1664	32.1269	32.1269	31.9983	32.3489	32.5156	32.1422	32.341	31.933	31.9188	32.3061	32.1453				+	LSD1-0hr_NLS-0hr	+	LSD1-24hr_NLS-24hr	+	LSD1-66hr_NLS-66hr		109	109	103	76.2	76.2	73.3	154.64	0	323.31	47277000000	2713	4	4	4	4	4	4	3.83e-08	0	6.31882	5.34485	1.17e-06	0	6.47215	4.86161	2.44e-07	0	6.38358
24.5225	24.4488	24.7945	24.5165	24.895	24.7024	25.2058	25.4298	25.5667	25.5433	26.2244	25.9517				+	LSD1-0hr_NLS-0hr	+	LSD1-24hr_NLS-24hr	+	LSD1-66hr_NLS-66hr	+	21	16	4	51.4	42.6	10.3	60.899	0	214.75	390400000	170	4	4	4	0	0	0	8.69e-07	0	7.06461	5.25581	3.25e-06	0	7.09162	4.95254	1.37e-07	0	7.56623
28.0813	27.5609	27.5014	27.8741	28.9202	29.0583	28.9202	28.995	26.9316	26.7771	26.8019	26.7129				+	LSD1-0hr_NLS-0hr	+	LSD1-24hr_NLS-24hr	+	LSD1-66hr_NLS-66hr	+	56	56	56	49	49	49	152.65	0	323.31	2960600000	594	4	4	4	4	4	4	5.94e-06	0	8.04961	5.216	4.07e-06	0	6.22014	4.46325	3.22e-07	0	7.65673
30.2979	29.4093	30.7047	30.0864	29.9259	29.7341	30.2308	29.9539	28.2891	28.3951	29.3494	28.5934				+	LSD1-0hr_NLS-0hr	+	LSD1-24hr_NLS-24hr	+	LSD1-66hr_NLS-66hr	+	33	32	32	70.4	70.4	70.4	57.907	0	323.31	9233200000	514	4	4	4	4	4	4	1.13e-06	0	6.907	5.1093	8.41e-08	0	7.0613	5.73022	4.03e-06	0	6.74504
24.3511	24.4488	24.5225	24.5285	23.9933	24.1488	23.8481	24.0854	23.632	24.1642	23.8576	24.1015				+	LSD1-0hr_NLS-0hr	+	LSD1-24hr_NLS-24hr	+	LSD1-66hr_NLS-66hr		20	20	20	31.5	31.5	31.5	109.95	0	164.02	175910000	168	4	4	4	0	0	0	6.62e-06	0	6.67535	4.57573	4.61e-06	0	6.1102	4.38029	1.14e-06	0	6.16146
28.7292	28.5165	28.8534	28.6075	29.2602	28.9146	29.5664	29.6714	30.3828	30.0217	31.2535	31.0927				+	LSD1-0hr_NLS-0hr	+	LSD1-24hr_NLS-24hr	+	LSD1-66hr_NLS-66hr	+	72	72	71	63.2	63.2	62.4	124.79	0	323.31	9799700000	1166	4	4	4	4	4	4	9.35e-08	0	5.22866	4.44957	3.59e-07	0	5.54161	4.49585	6.83e-06	0	5.46878
24.4425	23.1916	23.7895	24.5105	24.3975	24.6096	24.4984	24.8385	25.433	25.4266	25.3943	25.4923				+	LSD1-0hr_NLS-0hr	+	LSD1-24hr_NLS-24hr	+	LSD1-66hr_NLS-66hr	+	19	19	19	35	35	35	99.136	0	155.57	279980000	198	4	4	4	0	3	1	3.71e-06	0	5.84894	4.28733	1.11e-06	0	6.75164	5.02833	5.03e-06	0	6.8659
24.8997	25.065	23.2506	25.239	24.2463	23.391	22.867	24.5165	25.4394	25.4362	24.6865	25.2643				+	LSD1-0hr_NLS-0hr	+	LSD1-24hr_NLS-24hr	+	LSD1-66hr_NLS-66hr		34	34	34	29.1	29.1	29.1	187.2	0	201.43	252320000	192	4	4	4	1	2	3	2.37e-05	0	6.2462	4.07017	0.000131	0	5.87797	3.50037	5.98e-07	0	6.5935
23.1301	24.9584	24.1095	23.3778	23.867	24.2678	23.5754	24.0526	24.2535	24.1488	23.2535	24.0608				+	LSD1-0hr_NLS-0hr	+	LSD1-24hr_NLS-24hr				1	1	1	2.1	2.1	2.1	105.54	0.0072216	2.5102	327420000	64	4	4	4	0	0	4	2.76e-05	0	5.19937	3.56899	1.22e-06	0	6.4736	4.85243	0.7	0.676331	0.217685
23.9584	22.7975	22.6231	24.217	23.9406	23.4676	23.214	24.317	24.8764	24.8044	24.6703	25.1055				+	LSD1-0hr_NLS-0hr	+	LSD1-24hr_NLS-24hr	+	LSD1-66hr_NLS-66hr	+	24	24	23	37.9	37.9	37	104.87	0	292.37	177370000	181	4	4	4	0	1	2	3.08e-05	0	5.16784	3.53255	1.8e-05	0	5.4864	3.78936	5.5e-09	0	6.44569
27.8445	26.9089	28.4976	27.9031	27.611	27.8564	28.1459	27.8203	27.5898	27.2891	28.3745	27.7581				+	LSD1-0hr_NLS-0hr	+	LSD1-24hr_NLS-24hr	+	LSD1-66hr_NLS-66hr		23	16	16	63.7	48.4	48.4	55.302	0	242.45	2494600000	226	4	4	4	4	4	4	3.11e-05	0	4.5387	3.2254	1.19e-05	0	5.41774	3.83708	3.67e-06	0	4.30274
24.1719	23.0139	24.3239	24.2463	23.8481	22.9153	23.7995	24.2244	24.1015	23.9134	24.4488	23.867				+	LSD1-0hr_NLS-0hr	+	LSD1-24hr_NLS-24hr	+	LSD1-66hr_NLS-66hr		22	22	22	27.7	27.7	27.7	137.51	0	116.62	180560000	152	4	4	4	4	4	4	5.95e-05	0	4.39848	3.05049	8.68e-05	0	3.61467	2.6039	0.000462	0.000597701	2.15998
28.3367	27.7389	28.8712	28.3828	28.2354	28.5052	28.726	28.5052	28.17	28.1652	28.8741	28.2759				+	LSD1-0hr_NLS-0hr	+	LSD1-24hr_NLS-24hr	+	LSD1-66hr_NLS-66hr		26	26	19	63.3	63.3	47.7	55.074	0	291.27	3799100000	441	4	4	4	4	4	4	4.14e-06	0	3.72495	3.01279	7.43e-08	0	3.93374	3.49125	8.4e-07	0	3.73648
28.8887	28.5934	28.5826	29.0813	28.8324	28.7421	28.7195	29.3153	29.3536	29.1337	29.391	29.5916				+	LSD1-0hr_NLS-0hr	+	LSD1-24hr_NLS-24hr	+	LSD1-66hr_NLS-66hr		67	67	67	66.6	66.6	66.6	124.31	0	323.31	5752000000	1170	4	4	4	4	4	4	2.56e-06	0	3.38418	2.82513	4.11e-06	0	3.56387	2.90716	5.59e-06	0.00148571	3.41776
22.2214	20.5165	23.0789	22.6822	23.4676	23.1095	24.48	25.0317	24.3239	24.2317	25.1833	24.9584				+	LSD1-0hr_NLS-0hr	+	LSD1-24hr_NLS-24hr	+	LSD1-66hr_NLS-66hr	+	19	19	19	42.9	42.9	42.9	74.219	0	207.4	180680000	145	4	4	4	2	1	3	0.00039415	0	4.63263	2.80236	2.84e-05	0	5.70946	3.79553	1.82e-05	0	5.50767
24.6376	24.0275	23.9847	24.8336	24.4923	24.6431	24.1946	25.1681	24.3578	23.4676	24.8191	24.7594				+	LSD1-0hr_NLS-0hr	+	LSD1-24hr_NLS-24hr	+	LSD1-66hr_NLS-66hr		34	28	28	71.9	62.5	62.5	70.07	0	178.53	247490000	218	4	4	4	4	4	4	0.000449899	0	4.38911	2.68602	0.00129843	0	4.41234	2.48082	0.000345524	0.0013	4.08446
23.1658	21.3101	21.417	21.5498	23.5285	23.1063	23.0821	23.4298	24.391	23.9495	24.6595	24.8044				+	LSD1-0hr_NLS-0hr	+	LSD1-24hr_NLS-24hr	+	LSD1-66hr_NLS-66hr	+	20	20	20	32.3	32.3	32.3	122.46	0	163.04	122160000	128	4	4	4	1	2	2	0.000219592	0	3.91862	2.61832	4.55e-07	0	5.65267	4.53322	2.93e-06	0	5.89123
21.0493	21.0756	20.7223	20.6971	21.5165	21.1015	21.7013	21.7755	22.7389	21.5777	23.5638	23.5638				+	LSD1-0hr_NLS-0hr	+	LSD1-24hr_NLS-24hr	+	LSD1-66hr_NLS-66hr	+	10	10	10	26.4	26.4	26.4	79.147	0	54.854	46551000	42	4	4	4	1	2	1	1.77e-05	0	3.19109	2.53335	4.14e-05	0.00192	3.05559	2.37202	0.000369	0.00136842	4.32067
26.604	25.8576	26.4314	26.6998	26.5536	27.3153	26.5754	26.4202	26.1852	25.9134	26.3477	26.0894				+	LSD1-0hr_NLS-0hr	+	LSD1-24hr_NLS-24hr	+	LSD1-66hr_NLS-66hr		8	8	8	69.7	69.7	69.7	10.366	0	144.61	979590000	141	4	4	4	4	4	4	1.29e-05	0	3.07734	2.48772	0.000189	0	3.85373	2.61243	5.04e-05	0.00083871	2.34749
26.8741	26.604	26.604	26.726	26.7389	26.7771	26.7771	26.9539	26.8973	26.673	27.4938	27.3745				+	LSD1-0hr_NLS-0hr	+	LSD1-24hr_NLS-24hr	+	LSD1-66hr_NLS-66hr		20	20	2	65.2	65.2	4	45.971	0	276.15	1305000000	277	4	4	4	4	4	4	3.32e-07	0	2.72176	2.44598	5.18e-06	0	3.66799	2.95363	5.86e-07	0	4.31058
23.7077	23.1658	23.7286	23.5638	22.3752	22.743	22.5237	22.5261	20.5165	20.4972	20.8423	20.7056				+	LSD1-0hr_NLS-0hr	+	LSD1-24hr_NLS-24hr	+	LSD1-66hr_NLS-66hr	+	15	15	15	33.4	33.4	33.4	79.102	0	34.068	74143000	53	4	4	4	4	4	1	1.68e-06	0	2.80918	2.43642	1.44e-07	0	2.93185	2.65205	0.00689	0.00364228	2.15209
23.9847	23.6096	25.1488	23.8764	23.7077	23.1596	24.1332	24.0935	24.417	23.5285	25.1253	24.5404				+	LSD1-0hr_NLS-0hr	+	LSD1-24hr_NLS-24hr	+	LSD1-66hr_NLS-66hr		41	39	37	26.8	26.2	24.6	273.41	0	125.9	212800000	184	4	4	4	4	4	4	0.000296678	0	3.38425	2.32923	0.000111433	0	3.5365	2.53162	0.00205427	0.000945455	3.35336
22.8689	22.4349	22.9584	22.8538	22.4825	22.6253	23.0037	22.7935	23.1612	23.2678	23.632	23.7182				+	LSD1-0hr_NLS-0hr	+	LSD1-24hr_NLS-24hr	+	LSD1-66hr_NLS-66hr		21	21	21	33.8	33.8	33.8	100.62	0	95.311	92198000	115	4	4	4	4	4	4	1.75e-05	0	2.83009	2.30114	8.03e-06	0.00181132	2.79377	2.33103	4.91e-05	0.00118182	3.22867
22.1642	21.6006	20.8499	21.4015	21.4066	20.5165	20.343	20.6714	22.2678	21.6051	22.6779	22.1143				+	LSD1-0hr_NLS-0hr	+	LSD1-24hr_NLS-24hr	+	LSD1-66hr_NLS-66hr	+	9	9	9	30.6	30.6	30.6	62.641	0	44.496	32846000	47	4	4	4	2	0	2	0.00022107	0	3.14656	2.24874	0.000590003	0.00115663	2.68604	1.90762	2.67e-05	0.001625	3.80716
22.8708	21.9207	22.0951	22.5237	22.4093	21.2006	22.5915	22.8171	23.4676	23.0967	23.7695	23.6096				+	LSD1-0hr_NLS-0hr	+	LSD1-24hr_NLS-24hr	+	LSD1-66hr_NLS-66hr	+	14	13	13	17.4	16.7	16.7	130.35	0	57.935	83906000	76	4	4	4	2	2	4	0.000212728	0	3.06759	2.21241	0.00933856	0.00102128	3.39192	1.78447	0.000229927	0.000764706	2.48266
23.4041	23.6649	23.7492	23.5869	23.6431	23.3778	23.7077	23.7895	24.2463	24.391	24.8288	24.6971				+	LSD1-0hr_NLS-0hr	+	LSD1-24hr_NLS-24hr	+	LSD1-66hr_NLS-66hr	+	27	27	27	47.2	47.2	47.2	91.612	0	192.43	189840000	192	4	4	4	4	4	4	6.54e-05	0	2.85331	2.20932	2.88e-06	0.00135211	2.42252	2.11664	0.000101	0.000675325	2.17867
20.9459	19.9054	19.9068	20.0559	21.6497	21.6141	21.3592	21.9672	23.9672	23.7286	24.4551	24.4298				+	LSD1-0hr_NLS-0hr	+	LSD1-24hr_NLS-24hr	+	LSD1-66hr_NLS-66hr	+	12	8	8	40.6	31.7	31.7	47.744	0	56.423	73228000	43	4	4	4	0	0	0	0.000248983	0.000912281	2.74093	2.02231	0.00112386	0	4.20665	2.44301	1.45e-05	0	5.45327
25.5812	25.6944	25.6676	25.5225	25.673	26.2553	25.9672	26.1507	24.2678	24.5696	25.1253	24.945				+	LSD1-0hr_NLS-0hr	+	LSD1-24hr_NLS-24hr	+	LSD1-66hr_NLS-66hr	+	33	33	33	40.8	40.8	40.8	138.59	0	215.52	569820000	362	4	4	4	4	4	4	2.39e-08	0.000896552	2.10153	1.99009	8.54e-06	0.00141176	2.53898	2.1475	0.000222	0.00108333	3.2863
23.6865	23.5522	23.2961	23.6209	23.7389	23.5869	23.7594	24.2607	24.1174	23.7492	24.2607	24.317				+	LSD1-0hr_NLS-0hr	+	LSD1-24hr_NLS-24hr	+	LSD1-66hr_NLS-66hr		16	16	16	27.6	27.6	27.6	104.72	0	73.368	168440000	145	4	4	4	4	4	4	1.55e-05	0.000881356	2.34075	1.97328	0.000761	0.00131507	3.07464	2.06365	0.000334161	0.001	3.05871
24.2607	23.6096	23.0951	24.1795	21.6886	21.3962	21.0559	22.2096	22.3778	22.2036	21.5404	22.3101				+	LSD1-0hr_NLS-0hr	+	LSD1-24hr_NLS-24hr	+	LSD1-66hr_NLS-66hr	+	21	21	21	27.3	27.3	27.3	131.84	0	93.644	83443000	83	4	4	4	4	4	3	0.000281864	0.000866667	2.66755	1.97055	0.000133926	0.00118519	2.54257	1.96357	0.00948427	0.000658228	3.19421
24.5344	23.5983	24.5983	24.6264	24.1332	23.4425	23.9495	24.7895	25.1095	24.9043	25.4298	24.7389				+	LSD1-0hr_NLS-0hr	+	LSD1-24hr_NLS-24hr	+	LSD1-66hr_NLS-66hr		31	31	31	38.2	38.2	38.2	127.29	0	154.55	303830000	259	4	4	4	4	4	4	0.000172807	0.000852459	2.5888	1.96982	0.0105433	0.00375	2.08995	1.33069	0.000196891	0.00158559	1.80285
23.5285	23.4676	23.5983	23.48	23.7492	23.6971	23.6209	24.0105	22.7013	22.7655	23.0326	23.1285				+	LSD1-0hr_NLS-0hr	+	LSD1-24hr_NLS-24hr	+	LSD1-66hr_NLS-66hr		15	15	15	31.9	31.9	31.9	79.565	0	103.92	139070000	127	4	4	4	4	4	4	2.11e-06	0.00083871	2.2158	1.96894	0.000342	0.00128696	2.02869	1.5866	0.014738	0.00517986	2.14665
26.4473	25.8576	26.3828	26.5624	25.6348	25.1795	25.7103	25.9912	24.7492	24.604	24.6971	24.3239				+	LSD1-0hr_NLS-0hr	+	LSD1-24hr_NLS-24hr	+	LSD1-66hr_NLS-66hr	+	39	39	7	48.1	48.1	9.7	141.38	0	323.31	647690000	433	4	4	4	4	4	4	1.66e-05	0.0008125	2.27136	1.9203	0.000265	0.00134545	2.0861	1.63817	8.79e-05	0.000626506	2.02883
21.743	21.2821	21.7265	21.9134	21.8307	22.0789	21.9316	22.1363	22.0426	22.9951	22.239	22.343				+	LSD1-0hr_NLS-0hr	+	LSD1-24hr_NLS-24hr	+	LSD1-66hr_NLS-66hr		8	8	8	26.6	26.6	26.6	54.532	0	34.415	43192000	60	4	4	4	2	1	0	0.00224112	0.00284848	2.96479	1.87365	0.000376663	0	3.87803	2.51462	7.9e-05	0.00167742	4.14586
25.8312	25.772	24.9271	26.0317	25.433	24.9803	25.1095	25.8433	26.7771	26.3359	26.1833	26.533				+	LSD1-0hr_NLS-0hr	+	LSD1-24hr_NLS-24hr	+	LSD1-66hr_NLS-66hr		34	34	34	38.1	38.1	38.1	144.86	0	323.31	700660000	471	4	4	4	4	4	4	0.000444695	0.00276471	2.54254	1.86061	0.00207206	0.00329032	2.09499	1.49096	1.28e-05	0.000852459	2.25784
24.0275	22.9513	21.9531	24.4923	23.3511	21.6276	22.632	24.4862	23.8858	22.3101	22.7035	23.5638				+	LSD1-0hr_NLS-0hr	+	LSD1-24hr_NLS-24hr	+	LSD1-66hr_NLS-66hr		26	26	26	23.9	23.9	23.9	217.39	0	231.98	124970000	140	4	4	4	4	3	4	0.00642534	0.00272464	3.40799	1.8591	0.00728464	0.00106667	3.39411	1.83185	0.00193831	0.00183333	2.17194
26.976	26.2021	27.1312	27.1312	26.673	26.5898	26.976	27.0813	26.5898	26.4999	26.9089	26.7389				+	LSD1-0hr_NLS-0hr	+	LSD1-24hr_NLS-24hr	+	LSD1-66hr_NLS-66hr		53	53	53	40.7	40.7	40.7	172.44	0	323.31	1390500000	776	4	4	4	4	4	4	7.79e-05	0.0035493	2.25218	1.82028	5.57e-06	0.0012973	2.39061	2.06163	8.59e-06	0.0008125	2.19834
19.9601	20.2302	20.3321	21.1332	21.9777	21.1332	21.2707	23.0983	23.867	23.3376	23.9584	24.3101				+	LSD1-0hr_NLS-0hr	+	LSD1-24hr_NLS-24hr	+	LSD1-66hr_NLS-66hr	+	22	22	22	44.5	44.5	44.5	66.695	0	323.31	70257000	74	4	4	4	0	1	0	0.00133909	0.00422222	2.59074	1.77462	0.0011653	0.00168421	3.79927	2.29348	4.86e-06	0	5.71884
21.9243	21.2066	21.4221	18.6096	22.2535	22.2477	20.417	21.8423	26.4661	25.5433	25.2643	26.228				+	LSD1-0hr_NLS-0hr	+	LSD1-24hr_NLS-24hr	+	LSD1-66hr_NLS-66hr	+	22	13	13	60.6	35.4	35.4	57.621	0	157.09	259190000	115	4	4	4	1	2	4	0.00629412	0.00416438	3.12223	1.77413	0.00578894	0.00126496	2.51261	1.56984	0.00663954	0.0109888	1.61481
21.7389	20.9243	21.5869	21.2244	21.4526	22.2564	21.6231	21.8987	19.5011	20.6714	20.8269	20.1332				+	LSD1-0hr_NLS-0hr	+	LSD1-24hr_NLS-24hr	+	LSD1-66hr_NLS-66hr	+	8	8	8	37.3	37.3	37.3	31.01	0	19.92	30106000	36	4	4	4	4	4	1	7.23e-05	0.00410811	2.16955	1.77024	0.000139	0.001	2.24469	1.77881	0.0382936	0.0224533	1.59949
23.4551	22.8987	23.7695	23.7077	23.0918	22.9225	23.3511	23.632	22.1395	21.6096	22.7533	22.632				+	LSD1-0hr_NLS-0hr	+	LSD1-24hr_NLS-24hr	+	LSD1-66hr_NLS-66hr		14	14	8	26.3	26.3	17.5	83.752	0	62.119	108360000	122	4	4	4	4	4	4	0.000101362	0.0045641	2.16347	1.74645	0.00032827	0.00139623	2.14335	1.65867	0.000480386	0.000896552	2.72641
25.0484	24.9584	25.0148	25.0484	25.019	25.1565	24.9316	25.141	25.3712	25.3844	25.7871	25.7208				+	LSD1-0hr_NLS-0hr	+	LSD1-24hr_NLS-24hr	+	LSD1-66hr_NLS-66hr		52	52	52	33.7	33.7	33.7	237.47	0	323.31	473600000	431	4	4	4	4	4	4	5.53e-08	0.00450633	1.8223	1.72587	1.96e-07	0.00096	1.85282	1.73121	8.58e-06	0.000712329	2.10966
24.5926	24.6153	24.558	24.5983	24.7645	25.4831	24.8717	25.1015	23.1206	23.4298	23.8764	23.3239				+	LSD1-0hr_NLS-0hr	+	LSD1-24hr_NLS-24hr	+	LSD1-66hr_NLS-66hr	+	33	33	33	33.2	33.2	33.2	144.54	0	323.31	273260000	259	4	4	4	4	4	4	6.65e-05	0.00553086	2.06599	1.70511	7.58e-06	0.00147692	2.56702	2.17432	6.3e-05	0.00144444	3.83206
26.9539	26.518	27.5826	26.9977	27.4234	27.4551	27.6798	27.7958	26.8973	26.8623	27.6865	27.3239				+	LSD1-0hr_NLS-0hr	+	LSD1-24hr_NLS-24hr	+	LSD1-66hr_NLS-66hr		56	56	1	60.7	60.7	0.9	108.35	0	285.05	2004200000	746	4	4	4	4	4	4	0.000137453	0.00595238	2.07354	1.67007	4.99e-07	0.00188235	2.61155	2.34041	0.000202	0.00185263	1.90494
21.1395	20.9882	21.0691	19.9742	21.0426	20.8802	21.3211	21.823	20.2302	20.9951	20.7389	20.4576				+	LSD1-0hr_NLS-0hr	+	LSD1-24hr_NLS-24hr	+	LSD1-66hr_NLS-66hr		4	4	3	10.2	10.2	8.6	63.505	0	15.057	22918000	28	4	4	4	2	3	3	0.00275871	0.0064186	2.44024	1.62707	3.31e-05	0.0013913	2.65706	2.14112	0.00385	0.00489552	1.89139
22.1047	20.8876	22.823	22.343	22.5309	22.0886	22.2792	22.4626	22.6886	22.9024	23.2463	23.0886				+	LSD1-0hr_NLS-0hr	+	LSD1-24hr_NLS-24hr	+	LSD1-66hr_NLS-66hr		9	9	9	25	25	25	60.501	0	73.836	69224000	61	4	4	4	4	4	4	0.0015423	0.00634483	2.28186	1.6111	1.46e-06	0.00128	2.31241	2.05932	1.71e-06	0.00110638	2.67282
21.1015	20.265	21.1079	22.3348	20.4476	20.0559	20.1206	20.9812	23.0691	22.6714	22.5475	23.3239				+	LSD1-0hr_NLS-0hr			+	LSD1-66hr_NLS-66hr	+	13	13	13	27.3	27.3	27.3	88.75	0	76.24	47521000	42	4	4	4	1	2	4	0.0108112	0.00627273	2.86552	1.60368	0.122275	0.0794131	1.10852	0.685754	0.000461973	0.00177778	1.96176
21.5823	19.5255	21.1581	21.5638	21.4923	20.9459	23.0459	22.019	18.9736	18.1661	19.56	18.6203				+	LSD1-0hr_NLS-0hr	+	LSD1-24hr_NLS-24hr			+	5	5	5	17.4	17.4	17.4	66.807	0	13.414	35185000	11	3	4	0	0	0	0	0.0125888	0.0064	2.59186	1.4919	0.000158632	0	4.08662	2.74548	1	1	0
21.8538	22.5189	21.1332	21.823	21.9243	21.7915	20.9024	22.2448	20.0559	19.7089	18.0468	18.2849				+	LSD1-0hr_NLS-0hr	+	LSD1-24hr_NLS-24hr			+	8	8	8	31.6	31.6	31.6	50.974	0	59.717	29465000	33	4	4	2	4	3	0	0.000867781	0.00637736	1.92167	1.46256	0.011717	0.00294215	2.65322	1.5229	0.166731	0.147034	0.863249
21.1519	20.8191	21.391	20.4775	21.2764	21.265	21.7348	21.4324	19.8484	20.3538	20.4576	20.5545				+	LSD1-0hr_NLS-0hr	+	LSD1-24hr_NLS-24hr	+	LSD1-66hr_NLS-66hr		8	8	8	26.9	26.9	26.9	61.758	0	28.889	26230000	33	4	4	4	2	2	1	0.00142072	0.00637838	1.94517	1.44164	0.00053035	0.00117073	2.67029	1.9105	0.0407941	0.0184115	1.74209
29.7373	29.2736	29.5609	29.8157	29.651	29.7565	29.6389	29.9259	30.0084	29.9117	30.362	30.1724				+	LSD1-0hr_NLS-0hr	+	LSD1-24hr_NLS-24hr	+	LSD1-66hr_NLS-66hr		104	104	2	58.3	58.3	1.3	216.37	0	323.31	11478000000	1879	4	4	4	4	4	4	4.73e-05	0.00686726	1.65345	1.42587	3.95e-06	0.00140952	1.85856	1.66391	0.000128	0.000611765	2.03698
25.0105	24.8142	25.4488	24.8904	25.1527	25.2856	25.2607	25.4551	24.5926	24.6264	25.217	24.9316				+	LSD1-0hr_NLS-0hr	+	LSD1-24hr_NLS-24hr	+	LSD1-66hr_NLS-66hr		22	22	22	55.5	55.5	55.5	61.361	0	227.96	435240000	249	4	4	4	4	4	4	9.59e-05	0.00674783	1.68093	1.42007	2.22e-06	0.000969697	1.93971	1.7464	0.000484	0.00181443	1.97633
21.7348	21.4923	20.0559	21.4874	20.4775	20.4375	20.4375	20.9882	20.7634	20.5638	20.2066	20.6886				+	LSD1-0hr_NLS-0hr	+	LSD1-24hr_NLS-24hr	+	LSD1-66hr_NLS-66hr		11	10	9	9.9	8.7	7.8	175.55	0	21.821	22405000	43	4	4	4	3	3	3	0.00835174	0.00668966	2.23118	1.41405	0.00246367	0.00611321	1.67436	1.25403	4.11e-05	0.00275862	1.66979
21.2989	21.8073	20.2989	20.0951	21.4626	22.0326	21.1581	21.2764	24.4105	23.7995	23.6096	24.5344				+	LSD1-0hr_NLS-0hr	+	LSD1-24hr_NLS-24hr			+	24	3	2	62.3	15.2	7.1	57.6	0	64.331	107530000	55	4	4	4	3	2	4	0.00595768	0.00702521	2.10035	1.39546	0.0463136	0.00645963	2.50463	1.25201	0.210702	0.291462	0.521294
23.5045	22.4526	21.7182	23.2678	20.9742	20.9601	28.0914	20.8423	22.741	23.7182	22.4375	23.2821				+	LSD1-0hr_NLS-0hr						58	58	58	24.3	24.3	24.3	332.91	0	323.31	424630000	149	4	4	4	4	4	4	0.025189	0.00829268	2.54831	1.37	0.532043	0.224658	1.21124	0.42841	0.897012	0.924908	0.0536103
23.5045	23.4676	23.654	23.4041	23.5869	23.1596	23.3239	23.6865	22.8783	23.1316	23.391	23.1931				+	LSD1-0hr_NLS-0hr	+	LSD1-24hr_NLS-24hr	+	LSD1-66hr_NLS-66hr		14	14	14	31.8	31.8	31.8	106.32	0	167.96	139470000	183	4	4	4	4	4	4	7.39e-06	0.00822581	1.51053	1.36598	0.000305	0.0132766	1.33303	1.13038	0.00122712	0.000619048	2.32675
21.8802	21.6096	21.0426	21.3857	22.5892	22.5451	22.44	22.5915	20.3101	20.3962	20.5356	20.4972				+	LSD1-0hr_NLS-0hr	+	LSD1-24hr_NLS-24hr	+	LSD1-66hr_NLS-66hr	+	13	13	13	28.1	28.1	28.1	100.83	0	38.147	42104000	47	4	4	4	3	4	0	0.0135876	0.00834646	2.21994	1.35119	3e-05	0.00114286	2.28099	1.89549	0.000374	0.000742857	2.51614
20.9951	21.265	21.3962	21.632	20.7796	21.0224	20.6453	21.6886	20.1206	20.1332	20.417	20.9459				+	LSD1-0hr_NLS-0hr	+	LSD1-24hr_NLS-24hr	+	LSD1-66hr_NLS-66hr		9	9	9	10.5	10.5	10.5	140.94	0	97.133	24008000	29	4	4	4	4	1	0	0.000331534	0.00828125	1.65465	1.34964	0.00240745	0.00385714	1.86139	1.35779	0.00155228	0.00736986	1.65908
21.6276	21.8576	21.6886	22.7975	20.417	20.3538	20.4476	21.6141	21.7995	21.2707	21.7995	22.1856				+	LSD1-0hr_NLS-0hr	+	LSD1-24hr_NLS-24hr	+	LSD1-66hr_NLS-66hr	+	10	10	10	12.8	12.8	12.8	192.63	0	29.962	39765000	27	4	4	4	4	0	2	0.00263356	0.00866165	1.80398	1.32062	0.000314015	0.00123077	2.7779	2.01932	0.0118708	0.00189247	2.72131
25.317	24.8717	24.6153	25.4707	24.8288	24.6811	24.5754	25.1833	25.8834	25.6568	25.7182	25.7466				+	LSD1-0hr_NLS-0hr	+	LSD1-24hr_NLS-24hr	+	LSD1-66hr_NLS-66hr		28	28	28	44.8	44.8	44.8	87.56	0	274.11	496340000	303	4	4	4	4	4	4	0.000960542	0.00847059	1.68736	1.31722	0.00296791	0.0163738	1.37548	1.06965	8.61e-05	0.00278261	1.70872
20.3211	18.2063	20.3752	20.2066	20.4972	20.4775	20.3962	18.011	20.4375	20.5731	20.6627	20.3857				+	LSD1-0hr_NLS-0hr	+	LSD1-24hr_NLS-24hr	+	LSD1-66hr_NLS-66hr		4	4	4	15.7	15.7	15.7	60.914	0	16.522	11721000	23	3	3	4	0	0	0	0.0150886	0.0086	2.13317	1.30593	0.0307391	0.0145306	1.84274	1.11298	8.8e-05	0.000666667	2.16481
19.5988	22.5333	20.7796	20.9098	21.0088	20.4375	21.2989	21.5777	21.9742	21.743	21.5823	21.6096				+	LSD1-0hr_NLS-0hr	+	LSD1-24hr_NLS-24hr	+	LSD1-66hr_NLS-66hr		2	2	2	7.1	7.1	7.1	50.656	0	4.7158	29755000	24	4	4	4	3	4	4	0.0137663	0.00892958	2.08733	1.29937	9.44e-05	0.00133333	2.70284	2.08784	8.41e-07	0.000981132	2.37471
20.2877	20.1703	19.9156	19.9459	20.3101	20.1581	20.8423	20.3962	21.2302	20.1825	22.1301	21.2185				+	LSD1-0hr_NLS-0hr	+	LSD1-24hr_NLS-24hr	+	LSD1-66hr_NLS-66hr		9	9	9	4.7	4.7	4.7	307.46	0	20.769	21179000	19	4	4	4	0	2	0	0.0127845	0.00923077	2.0519	1.29391	0.0294971	0.0226387	1.55644	1.00565	0.000531309	0.000962963	2.93811
22.4144	22.3266	22.6453	22.5983	22.1301	22.1976	22.4451	22.6298	21.7755	22.1642	22.4923	22.4898				+	LSD1-0hr_NLS-0hr	+	LSD1-24hr_NLS-24hr	+	LSD1-66hr_NLS-66hr		10	10	10	16.5	16.5	16.5	103.71	0	57.995	71441000	61	4	4	4	4	4	4	0.000113009	0.00976552	1.50247	1.2852	0.000424431	0.00869364	1.45702	1.20591	0.00439359	0.0135957	1.50327
24.0608	22.1886	23.0071	24.1174	21.4775	20.8346	28.3578	20.8191	21.7307	22.4451	20.7796	22.0054				+	LSD1-0hr_NLS-0hr						30	30	26	50.6	50.6	45	81.8	0	179.25	514340000	111	4	4	4	4	4	4	0.0504162	0.0110541	2.66864	1.27482	0.708066	0.40128	0.754858	0.258345	0.92837	0.925424	0.0632353
25.4425	25.6292	25.0854	24.4614	26.2151	26.5463	25.2499	25.5165	28.9146	28.2935	28.4354	28.8564				+	LSD1-0hr_NLS-0hr	+	LSD1-24hr_NLS-24hr			+	25	25	2	62.3	62.3	10.7	57.648	0	323.31	2330900000	383	4	4	4	4	4	4	0.00283481	0.0120774	1.69092	1.25418	0.0179206	0.022722	1.45646	1.00378	0.0191206	0.143616	0.682065
19.8284	20.2764	20.2066	20.1206	20.343	20.3645	19.8847	20.5165	20.8876	20.7307	20.2877	21.0691				+	LSD1-0hr_NLS-0hr	+	LSD1-24hr_NLS-24hr				6	6	6	20.7	20.7	20.7	57.788	0	12.276	19747000	14	4	4	4	1	2	4	0.00425346	0.0130798	1.6737	1.21748	0.126694	0.0485559	1.42777	0.790774	0.0581435	0.220253	0.561631
21.3592	21.5356	21.1395	21.8423	21.5404	20.5915	20.8034	21.8073	19.5049	19.3879	20.4874	19.8876				+	LSD1-0hr_NLS-0hr	+	LSD1-24hr_NLS-24hr	+	LSD1-66hr_NLS-66hr	+	3	3	3	11.6	11.6	11.6	52.685	0	14.21	27064000	45	4	4	4	4	4	4	0.00752467	0.0151479	1.70939	1.19321	0.00925559	0.00741176	1.80321	1.2201	0.0067128	0.0330193	1.16349
22.5285	22.0951	22.1332	22.5823	22.1856	21.5961	21.4972	22.2448	24.3778	24.1795	23.391	23.6096				+	LSD1-0hr_NLS-0hr					+	16	16	15	35.8	35.8	33.9	53.687	0	44.638	110130000	87	4	4	4	4	4	4	0.00717111	0.0150588	1.68256	1.1838	0.0678586	0.0583856	1.14943	0.757739	0.0412771	0.124428	0.795845
20.6971	19.9459	21.5685	21.3156	17.1957	17.9763	19.2832	16.8534	18.2236	17.2924	18.4513	17.4375				+	LSD1-0hr_NLS-0hr					+	5	5	5	18.2	18.2	18.2	52.576	0	16.468	9796700	14	4	1	0	4	0	0	0.00473098	0.0152914	1.59572	1.16873	0.796799	0.718515	-0.16179	-0.101054	1	1	0
22.1886	21.3376	21.8191	22.2302	22.1174	21.7675	22.1916	21.9985	22.4041	22.2155	22.6186	22.7307				+	LSD1-0hr_NLS-0hr	+	LSD1-24hr_NLS-24hr	+	LSD1-66hr_NLS-66hr		16	16	16	33.1	33.1	33.1	94.044	0	101.6	63697000	95	4	4	4	3	4	4	0.0698686	0.01575	2.47038	1.16436	2.36e-05	0.00460131	1.43873	1.28112	0.00102	0.0404103	1.02149
23.3376	23.7895	24.3975	24.4362	23.5869	22.8307	23.5165	24.0772	23.1426	22.6186	23.4041	23.1886				+	LSD1-0hr_NLS-0hr	+	LSD1-24hr_NLS-24hr	+	LSD1-66hr_NLS-66hr		14	8	8	24.6	15.7	15.7	82.251	0	26.009	189480000	33	4	4	4	3	2	1	0.0788833	0.0169061	2.46429	1.13801	0.0151614	0.000923077	3.3494	1.67825	0.0257557	0.000641975	3.9664
20.3211	21.002	20.7634	20.2877	20.3645	20.6453	20.9672	20.2877	18.2241	20.1332	20.3752	17.9014				+	LSD1-0hr_NLS-0hr	+	LSD1-24hr_NLS-24hr			+	6	6	6	16.4	16.4	16.4	61.207	0	13.365	20647000	9	4	4	2	1	0	1	0.0336218	0.0168132	1.94227	1.13703	4.63e-05	0.00121519	2.50268	2.01727	0.586	0.431503	0.510222
20.1946	18.5884	20.9459	21.3592	20.2185	20.4476	18.5888	20.2764	20.9601	20.6096	21.0625	20.5731				+	LSD1-0hr_NLS-0hr	+	LSD1-24hr_NLS-24hr	+	LSD1-66hr_NLS-66hr		9	1	1	45.3	5.6	5.6	34.357	0.0051282	2.8478	14745000	15	3	3	4	0	0	0	0.0464438	0.0173978	2.05087	1.12691	0.0226271	0.00630303	2.09059	1.23972	0.000574754	0.000732394	2.56222
21.0951	21.0292	20.1825	20.6006	19.9601	17.7	20.0691	21.0426	21.2185	20.5731	20.3752	21.7995				+	LSD1-0hr_NLS-0hr						17	17	17	16	16	16	177.19	0	92.981	32344000	40	4	3	4	2	3	4	0.0284212	0.0206564	1.78767	1.10156	0.625548	0.432664	0.421453	0.231598	0.175209	0.136598	-0.929275
20.4775	19.3268	19.901	19.2967	21.1825	21.2707	19.7207	19.692	24.141	23.8858	23.9043	24.2821				+	LSD1-0hr_NLS-0hr	+	LSD1-24hr_NLS-24hr			+	21	5	5	54.3	15.2	15.2	57.999	0	75.48	91402000	49	3	4	4	0	3	4	0.00784691	0.0251456	1.45298	1.05969	0.0692231	0.0416165	1.32118	0.826747	0.00119918	0.16306	0.583687
20.2066	17.9764	20.3645	20.6886	20.2535	16.7944	18.5025	18.3678	20.5165	21.2821	19.7651	20.714				+	LSD1-0hr_NLS-0hr					+	4	4	4	11	11	11	73.963	0	20.417	20064000	22	3	1	4	0	2	4	0.0461662	0.027566	1.7685	1.03677	0.888458	0.813249	-0.121433	-0.0663609	0.84995	0.83944	-0.116729
22.3805	23.1565	20.7553	20.8802	21.3156	22.1174	18.3957	20.5638	21.823	22.1488	18.2574	21.68				+	LSD1-0hr_NLS-0hr						4	4	0	38.9	38.9	0	16.502	0	17.43	50856000	26	4	3	3	2	4	4	0.111444	0.0283134	2.29168	1.02823	0.704347	0.531297	-0.320227	-0.177468	0.468126	0.281662	-0.782272
22.2006	21.6843	22.3017	22.5404	22.1976	22.2214	22.0526	21.8307	21.9637	22.4196	21.8538	22.019				+	LSD1-0hr_NLS-0hr						8	8	8	23.9	23.9	23.9	42.215	0	39.271	70923000	120	4	4	4	4	4	4	0.00293754	0.0283653	1.29983	1.02379	0.000837606	0.0839736	0.75463	0.672309	0.417921	0.602709	-0.217159
21.4324	20.5731	21.9388	22.0724	22.4221	22.002	22.5615	22.9424	22.5938	22.5451	22.9864	22.9968				+	LSD1-0hr_NLS-0hr	+	LSD1-24hr_NLS-24hr	+	LSD1-66hr_NLS-66hr	+	10	10	10	25.9	25.9	25.9	65.475	0	52.542	71560000	68	4	4	4	4	4	4	0.0084525	0.0281086	1.38872	1.02064	0.000957685	0.01476	1.35336	1.10455	0.0017389	0.0044812	1.79252
20.0292	20.0426	20.1457	20.2989	20.2066	19.7683	17.4652	21.5685	21.7755	21.7223	22.2332	22.1765				+	LSD1-0hr_NLS-0hr			+	LSD1-66hr_NLS-66hr	+	8	8	8	18.1	18.1	18.1	68.844	0	39.215	26806000	23	4	3	4	3	4	3	0.000402389	0.027982	1.19251	1.02032	0.602099	0.404314	0.471596	0.25392	7.82e-06	0.000787879	2.18571
22.8461	23.0559	23.3101	22.976	23.2535	23.0983	23.0951	23.3101	22.6757	22.7594	23.2288	23.141				+	LSD1-0hr_NLS-0hr	+	LSD1-24hr_NLS-24hr	+	LSD1-66hr_NLS-66hr		17	17	17	25.8	25.8	25.8	118.14	0	47.828	115310000	122	4	4	4	4	4	4	8.08e-05	0.0290536	1.13978	1.01689	5.15e-06	0.00346875	1.57398	1.42613	0.000378	0.00157143	1.85198
19.4476	20.5915	19.2787	18.6813	19.6714	19.2442	19.3079	17.6853	20.0156	20.4375	17.4163	20.3321				+	LSD1-0hr_NLS-0hr						4	4	4	22.2	22.2	22.2	16.317	0	5.7516	13579000	12	3	3	3	0	3	3	0.0195851	0.0302373	1.45579	0.996565	0.72792	0.653203	-0.1877	-0.123909	0.877959	0.822403	-0.15993
21.6231	21.6453	21.9171	21.4221	21.5165	21.6584	21.3045	21.928	20.9812	20.8651	21.3376	21.7512				+	LSD1-0hr_NLS-0hr	+	LSD1-24hr_NLS-24hr	+	LSD1-66hr_NLS-66hr		6	6	4	14.5	14.5	11.5	62.597	0	31.774	37676000	39	4	4	4	4	4	0	0.000884631	0.0317667	1.16768	0.980059	4.48e-05	0.00367347	1.51743	1.32518	0.000173	0.0012093	3.51071
19.0292	18.5444	20.3321	19.7223	19.2302	18.7471	18.4046	19.5933	17.3308	18.4894	19.2581	18.528				+	LSD1-0hr_NLS-0hr	+	LSD1-24hr_NLS-24hr				63	2	1	41.5	1.3	0.7	264.04	0	7.7356	7631000	28	3	4	3	3	4	1	0.0147246	0.0320984	1.36483	0.972844	0.0163601	0.048537	1.04213	0.792149	0.202337	0.221621	0.659584
19.2809	18.1521	19.9459	19.3145	20.2066	19.29	19.2232	19.8097	20.3857	20.0426	20.4775	18.1414				+	LSD1-0hr_NLS-0hr	+	LSD1-24hr_NLS-24hr	+	LSD1-66hr_NLS-66hr		2	2	2	7	7	7	25.548	0	60.027	9353800	14	3	4	3	0	0	0	0.0177293	0.0318374	1.3882	0.971646	0.00492241	0.00357616	1.87209	1.30711	0.0323534	0.0137263	1.8795
21.9388	22.3619	21.6364	22.8346	21.3211	19.5489	19.7553	21.7013	22.1206	21.1395	21.1642	20.8802				+	LSD1-0hr_NLS-0hr					+	18	18	18	18.2	18.2	18.2	215.68	0	48.997	47213000	73	4	4	4	4	4	4	0.0335679	0.0321781	1.49481	0.967638	0.841247	0.761118	-0.140197	-0.0839354	0.0759257	0.186835	0.645323
20.6971	20.8802	21.3101	21.2764	20.7223	20.3962	19.8742	18.4388	20.8727	22.0854	20.7955	21.5261				+	LSD1-0hr_NLS-0hr					+	7	7	7	26	26	26	39.638	0	13.634	31044000	44	4	3	4	3	3	3	0.0389117	0.0326265	1.51746	0.962636	0.985883	0.978139	0.0130634	0.00764709	0.378883	0.208176	0.924422
19.8891	20.3645	20.1825	19.647	20.0156	17.4974	19.8727	20.4066	18.1954	20.1079	20.1332	20.2877				+	LSD1-0hr_NLS-0hr						5	4	4	17	15.4	15.4	59.546	0	11.425	14422000	17	4	3	3	2	2	3	0.035149	0.0336126	1.46228	0.949673	0.546869	0.382911	0.473546	0.271853	0.59833	0.53287	0.346074
20.1206	20.1457	21.0292	20.5823	20.3101	19.6258	20.2185	20.4676	20.0156	19.5508	20.5915	20.4375				+	LSD1-0hr_NLS-0hr	+	LSD1-24hr_NLS-24hr	+	LSD1-66hr_NLS-66hr		7	7	7	15.1	15.1	15.1	81.951	0	27.161	16700000	18	4	4	4	3	3	1	0.00782504	0.034252	1.24608	0.945373	0.054903	0.0240956	1.6738	0.982386	0.010439	0.0128602	1.62496
20.5545	23.5638	19.6645	20.0559	20.1206	21.4221	18.124	20.2185	19.2832	19.9243	19.3624	17.4169				+	LSD1-0hr_NLS-0hr			+	LSD1-66hr_NLS-66hr		7	7	5	23.7	23.7	16.3	46.582	0	76.073	26926000	43	4	3	3	2	4	4	0.133587	0.0365891	2.02022	0.933142	0.58498	0.402042	-0.462814	-0.256801	0.0191043	0.00938922	-1.91421
21.632	22.5708	20.1206	20.7796	20.9951	21.5165	20.9531	20.2535	20.6096	20.5823	20.1457	20.6714				+	LSD1-0hr_NLS-0hr						6	6	6	26.3	26.3	26.3	36.511	0	19.24	34015000	25	4	4	4	3	4	4	0.0689634	0.036303	1.5941	0.926429	0.129018	0.222562	0.574393	0.433018	0.0785176	0.129951	-0.834569
19.3645	20.1079	19.5638	19.547	19.9214	18.417	20.6006	19.3233	19.1482	18.6241	18.8817	19.1507				+	LSD1-0hr_NLS-0hr						6	6	6	9	9	9	112.9	0	8.1579	12170000	12	4	4	3	2	3	1	0.00444079	0.0387761	1.15963	0.918894	0.547809	0.455462	0.326149	0.215675	0.155428	0.173993	0.740676
21.3484	20.5451	21.1765	21.4066	21.4221	20.6714	20.9388	22.1519	20.1457	17.7685	20.2066	20.1946				+	LSD1-0hr_NLS-0hr	+	LSD1-24hr_NLS-24hr			+	9	9	9	15.7	15.7	15.7	132.4	0	36.075	30034000	18	4	4	3	3	4	2	0.0383128	0.0396877	1.40543	0.917701	0.0144131	0.0277986	1.26743	0.923603	0.891242	0.875811	-0.104124
21.5915	21.1457	22.1269	20.0691	22.538	21.0625	19.0662	20.5915	21.6627	22.2593	22.4849	21.2185				+	LSD1-0hr_NLS-0hr						2	2	2	13.2	13.2	13.2	25.976	0	5.391	48356000	45	4	3	4	3	4	4	0.0677964	0.0431511	1.51743	0.902048	0.798163	0.657098	-0.225849	-0.122423	0.0810624	0.148896	0.75425
20.3101	19.4375	19.5049	20.0821	17.395	20.2764	20.0821	19.856	17.8575	19.9882	18.0636	16.8827				+	LSD1-0hr_NLS-0hr						10	2	2	12.8	2.6	2.6	101.19	0	5.2005	15581000	12	4	3	1	1	1	1	0.0579391	0.0429964	1.46743	0.901686	0.267832	0.124556	1.09722	0.577936	0.879084	0.838863	-0.138154
25.3612	24.867	24.7234	25.317	25.0233	24.7746	24.8811	25.1984	25.3273	25.1681	25.4862	25.5638				+	LSD1-0hr_NLS-0hr	+	LSD1-24hr_NLS-24hr	+	LSD1-66hr_NLS-66hr		8	8	6	43.7	43.7	28.4	20.811	0	129.41	501010000	199	4	4	4	4	4	4	0.00372746	0.0433857	1.1163	0.897961	0.000173255	0.0243472	1.08832	0.961276	1.82e-05	0.00514286	1.47087
21.5309	21.4626	20.7553	21.7098	21.265	21.1269	21.2593	22.0122	21.6141	15.4351	17.0529	21.1581				+	LSD1-0hr_NLS-0hr					+	2	2	2	23.5	23.5	23.5	6.4066	0.006233	2.7153	42380000	22	4	4	2	4	4	2	0.00387702	0.0437042	1.11411	0.89511	0.456399	0.547638	0.216306	0.170083	0.80714	0.617399	-0.479521
20.7634	20.3101	18.6529	18.7117	20.4273	19.786	19.8802	19.9316	19.8253	20.0559	17.096	19.5413				+	LSD1-0hr_NLS-0hr						5	5	5	9.2	9.2	9.2	151.25	0	16.022	12935000	9	2	4	3	1	3	1	0.0823265	0.0455664	1.54326	0.886586	0.057623	0.115326	0.808838	0.601257	0.532004	0.381137	0.559423
21.654	21.2821	20.9243	20.5165	21.0359	18.2297	21.1457	21.3805	22.3457	22.0393	21.5069	18.2947				+	LSD1-0hr_NLS-0hr			+	LSD1-66hr_NLS-66hr		8	8	8	32	32	32	46.374	0	27.694	36033000	35	4	3	3	3	4	1	0.0390427	0.0456446	1.32989	0.883297	0.76241	0.616195	-0.250105	-0.139689	0.0475291	0.00625	2.65431
19.5049	18.4094	18.1319	19.7077	17.9591	17.4534	16.9149	19.7207	19.6329	19.5897	17.5098	19.6731				+	LSD1-0hr_NLS-0hr	+	LSD1-24hr_NLS-24hr				4	4	4	5.9	5.9	5.9	86.876	0	3.9766	10960000	6	1	1	3	0	3	0	0.0249777	0.0461931	1.25169	0.880519	0.0873936	0.0433159	-1.362	-0.816787	0.591794	0.513234	0.366642
21.1946	20.9243	21.1395	21.2419	21.0951	21.1206	20.9812	20.6886	21.8576	22.2096	21.9388	21.5777				+	LSD1-0hr_NLS-0hr			+	LSD1-66hr_NLS-66hr		11	11	9	9.4	9.4	7.5	184.85	0	44.588	37962000	46	4	4	4	3	4	4	0.0503489	0.0479595	1.35616	0.871908	0.1229	0.202195	0.622168	0.461986	0.00308358	0.0150359	1.41377
25.8623	25.7338	26.3811	26.1035	25.5195	25.3712	25.9225	25.9584	25.2133	25.2317	25.8858	25.6998				+	LSD1-0hr_NLS-0hr	+	LSD1-24hr_NLS-24hr	+	LSD1-66hr_NLS-66hr		64	64	1	40.7	40.7	0.5	270.78	0	323.31	804160000	750	4	4	4	4	4	4	0.00129024	0.0501262	1.01973	0.864388	0.00142797	0.0244863	1.18125	0.974373	0.00345015	0.023931	1.2418
23.8288	23.4551	23.9406	24.1174	23.7796	23.6649	23.7695	24.1795	23.654	23.654	23.6971	23.6971						+	LSD1-24hr_NLS-24hr	+	LSD1-66hr_NLS-66hr		17	17	17	29.6	29.6	29.6	116.66	0	98.95	201230000	236	4	4	4	4	4	4	0.00066505	0.0501368	0.993752	0.860848	0.000981998	0.0312877	1.06434	0.903519	0.000173408	0.0173065	1.22148
21.9601	21.4066	21.0821	21.002	21.3752	21.9424	20.7876	20.9098	21.3857	21.5777	21.3156	20.9388								+	LSD1-66hr_NLS-66hr		3	3	3	23.3	23.3	23.3	24.838	0	9.3413	38316000	30	4	4	4	2	3	1	0.153698	0.0515385	1.79115	0.854069	0.232311	0.128925	0.98539	0.56575	0.0184269	0.0041875	2.39614
25.0691	24.8093	25.341	25.3443	25.2821	24.8717	25.5195	25.9738	25.3811	25.0608	25.8215	25.6431						+	LSD1-24hr_NLS-24hr	+	LSD1-66hr_NLS-66hr		31	31	31	34.7	34.7	34.7	151.12	0	301.39	615500000	450	4	4	4	4	4	4	0.000594933	0.0513738	0.980958	0.853559	0.00276699	0.0239051	1.22338	0.978151	0.00163344	0.0173939	1.32836
26.9202	26.3359	27.0813	26.8973	26.8504	26.9428	26.9869	26.9316	26.2661	26.2317	26.5165	26.2696						+	LSD1-24hr_NLS-24hr				101	101	101	47.5	47.5	47.5	341.12	0	323.31	1583400000	1329	4	4	4	4	4	4	0.00102531	0.0515346	0.991053	0.849149	1.12e-05	0.0171009	1.151	1.05927	0.000183	0.0738935	0.823567
24.9977	24.4298	24.976	25.1984	24.5463	24.6649	25.0975	24.9933	23.5045	23.2821	23.895	23.6209						+	LSD1-24hr_NLS-24hr	+	LSD1-66hr_NLS-66hr	+	19	19	19	62.8	62.8	62.8	56.536	0	106.52	350450000	273	4	4	4	4	4	4	0.00175495	0.0564048	0.968114	0.819625	0.000334033	0.033794	1.00833	0.88613	0.000918398	0.0105517	1.44476
20.7796	19.1858	21.4375	21.3752	19.9459	20.2302	20.714	20.8576	19.9054	19.6096	20.9024	20.8191						+	LSD1-24hr_NLS-24hr	+	LSD1-66hr_NLS-66hr		6	6	6	12.9	12.9	12.9	82.262	0	16.114	22193000	19	3	4	4	3	3	3	0.090435	0.0684905	1.25251	0.7725	0.024152	0.047967	1.07944	0.793493	0.0401633	0.0494774	1.2327
29.8843	29.5609	30.3303	30.2422	29.4823	29.3951	29.7031	29.7927	28.0864	28.2308	28.7486	28.3869						+	LSD1-24hr_NLS-24hr	+	LSD1-66hr_NLS-66hr	+	105	105	83	48.6	48.6	38.7	281.59	0	323.31	10661000000	2205	4	4	4	4	4	4	0.00343397	0.0744348	0.893778	0.750181	0.000388945	0.024289	1.11343	0.962686	0.000639545	0.00742069	1.58429
22.3321	17.6853	17.2302	22.2905	23.1976	23.2535	23.2535	23.3511	22.9116	23.391	22.8614	24.1253						+	LSD1-24hr_NLS-24hr	+	LSD1-66hr_NLS-66hr	+	7	7	6	25.5	25.5	23.2	63.078	0	17.018	129920000	14	2	4	4	0	3	2	0.273299	0.0833349	1.74855	0.713644	0.0789324	0.0204425	2.02842	1.03517	0.0908163	0.00933333	2.91011
18.8787	18.2587	19.9054	18.9344	19.3012	17.8762	23.0376	20.7634	19.3709	18.1998	20.1703	20.0292						+	LSD1-24hr_NLS-24hr	+	LSD1-66hr_NLS-66hr		56	1	1	57.7	3.2	3.2	112.26	0	6.2524	17486000	16	3	3	3	0	1	1	0.0410691	0.0924244	0.932827	0.686	0.109933	0.0226939	2.12673	0.996439	0.0354037	0.0317302	1.38147
18.1015	18.4516	19.9083	18.3495	20.7389	18.9882	19.4736	19.2454	18.6971	19.7651	19.5676	19.9316						+	LSD1-24hr_NLS-24hr				2	2	2	34.6	34.6	34.6	8.9723	0	7.163	8532500	17	2	3	4	0	1	2	0.11254	0.1	1.02941	0.662406	0.0349448	0.0305404	1.36416	0.907782	0.118693	0.221678	0.597378
21.8802	21.5731	21.8269	21.8987	21.7265	21.2707	21.4476	21.9777	21.4425	21.1395	18.6217	21.3538						+	LSD1-24hr_NLS-24hr				6	6	6	28.8	28.8	28.8	35.166	0	16.982	46153000	60	4	4	3	3	3	4	0.186508	0.101314	1.17059	0.65579	0.179903	0.0466778	1.68752	0.799036	0.684953	0.60104	-0.295815
21.0156	20.3538	20.8499	20.2989	20.002	19.9287	20.0559	20.2535	18.5584	18.4473	19.4375	20.6911								+	LSD1-66hr_NLS-66hr		7	7	7	9.7	9.7	9.7	118.03	0	14.459	17517000	11	4	4	1	3	3	0	0.168282	0.103308	1.11849	0.652552	0.36206	0.315305	0.483028	0.32424	0.0290357	0.0181188	1.68006
20.2535	20.3538	20.2185	19.9258	20.0821	20.2066	19.7683	20.2989	17.6414	17.6734	17.2255	19.0315						+	LSD1-24hr_NLS-24hr	+	LSD1-66hr_NLS-66hr	+	4	4	4	11.7	11.7	11.7	71.3	0	9.2049	13968000	19	4	4	0	3	1	3	0.109234	0.10963	0.968938	0.639337	0.0144044	0.0146387	1.66614	1.11874	0.00761519	0.0118261	-1.595
21.2244	20.3752	21.6409	21.0886	21.3962	21.4626	21.2933	21.68	20.9951	20.5451	20.8727	21.1269						+	LSD1-24hr_NLS-24hr				5	5	5	13.4	13.4	13.4	71.021	0	18.438	33564000	33	4	4	4	4	4	4	0.0561059	0.116346	0.84583	0.622827	0.000269837	0.0183243	1.21596	1.04828	0.0106458	0.0525867	1.05145
23.2199	22.4626	23.5045	24.1332	21.3045	20.8346	22.2506	22.4775	21.3156	20.8802	23.0658	22.5869						+	LSD1-24hr_NLS-24hr			+	17	16	15	22.9	22.1	21.2	140.24	0	66.683	93845000	74	4	4	4	4	4	4	0.0541519	0.118114	0.837945	0.620307	0.0413558	0.0409759	1.23802	0.837362	0.111012	0.0740418	1.25213
25.0275	24.5522	25.1293	25.8834	23.2155	22.6518	23.5869	24.0772	21.5685	19.7553	21.2535	20.6006								+	LSD1-66hr_NLS-66hr	+	38	38	38	30.7	30.7	30.7	222.94	0	262.54	263310000	223	4	4	4	4	4	4	0.064775	0.11812	0.850327	0.617667	0.396436	0.430113	0.313539	0.233391	0.020357	0.0206027	1.50176
23.6757	23.6865	23.4551	24.141	23.3376	23.0575	23.3376	23.5522	23.867	23.6757	24.1253	23.7492								+	LSD1-66hr_NLS-66hr		34	34	34	22	22	22	282.71	0	141.17	191670000	241	4	4	4	4	4	4	0.0231024	0.123904	0.749182	0.600659	0.0633951	0.231888	0.51393	0.419162	0.000130743	0.0088	1.40691
18.3365	18.0862	17.8879	18.3451	19.2232	17.5582	18.562	19.3233	22.6051	20.5731	22.3045	22.6907								+	LSD1-66hr_NLS-66hr	+	16	16	16	5.5	5.5	5.5	504.74	0	42.651	20567000	36	1	4	4	0	1	4	0.0200164	0.123641	0.741953	0.600218	0.607298	0.458867	0.352246	0.213507	0.0103145	0.00454962	2.13639
20.4576	21.5117	21.0951	20.2066	20.2419	18.732	19.0453	20.2302	20.0691	20.2764	20.5915	19.9742								+	LSD1-66hr_NLS-66hr		6	6	6	9.3	9.3	9.3	97.303	0	13.755	24015000	29	4	3	4	3	3	1	0.153545	0.133487	0.892275	0.577027	0.906264	0.876662	-0.0653791	-0.0426664	0.0649438	0.0478007	1.35718
23.9847	23.6757	24.1174	24.4105	23.7077	23.4425	23.9933	24.3376	24.8191	24.6595	25.1371	25.0233								+	LSD1-66hr_NLS-66hr		27	27	3	53.2	53.2	7.8	79.384	0	193.96	317420000	333	4	4	4	4	4	4	0.0131621	0.149567	0.652187	0.549221	0.0303667	0.130308	0.70437	0.563584	0.00285306	0.0493056	1.01167
19.6749	20.4576	19.5805	19.654	19.2137	19.9301	19.7173	19.5069	21.0088	21.4066	21.0292	21.1206						+	LSD1-24hr_NLS-24hr			+	7	7	7	15.3	15.3	15.3	63.691	0	20.21	21181000	30	4	4	4	2	1	4	0.108425	0.16508	0.725671	0.523949	0.0926176	0.0480992	1.31627	0.793589	0.518945	0.605114	0.230528
23.8385	22.6865	24.8191	23.9584	22.8727	23.3511	23.7895	23.1031	23.6096	23.3101	24.239	23.3101						+	LSD1-24hr_NLS-24hr				14	14	11	44.2	44.2	39.3	56.802	0	144.81	196440000	158	4	4	4	4	4	4	0.14575	0.167142	0.757418	0.521184	0.00289788	0.0410997	1.01316	0.837615	0.0219414	0.0819441	0.92604
20.5451	20.2185	19.6204	20.9171	20.2066	19.7521	20.1946	20.2419	20.6714	20.2419	21.3538	21.7307						+	LSD1-24hr_NLS-24hr				7	7	7	18.5	18.5	18.5	58.512	0	41.706	22987000	25	4	4	4	3	3	4	0.186003	0.167267	0.799516	0.520705	0.0423697	0.0453708	1.168	0.80298	0.0644746	0.135983	0.788446
22.928	22.8689	22.8858	22.6253	22.9153	22.8538	22.7369	23.0037	22.8839	22.6671	23.4041	23.1301								+	LSD1-66hr_NLS-66hr		18	18	18	26.5	26.5	26.5	120.33	0	65.516	117720000	172	4	4	4	4	4	4	0.000967343	0.172831	0.560503	0.512591	0.000313845	0.125161	0.624421	0.575803	0.00114167	0.031184	1.08881
21.002	20.4972	20.343	20.4273	20.4576	20.8034	20.2764	19.7455	20.0426	20.5638	19.6766	19.7569						+	LSD1-24hr_NLS-24hr				4	4	4	57	57	57	10.214	0	7.6235	21718000	31	4	4	4	3	2	3	0.237604	0.175994	0.828263	0.507673	0.0526905	0.026	1.53901	0.93898	0.408578	0.292972	0.66024
23.6209	22.8288	23.976	23.6865	23.5045	23.1991	23.3645	23.6865	25.0401	24.7389	25.6458	25.7796						+	LSD1-24hr_NLS-24hr	+	LSD1-66hr_NLS-66hr	+	20	20	20	38.6	38.6	38.6	74.049	0	181.47	281680000	257	4	4	4	4	4	4	0.0680221	0.176813	0.650462	0.50316	0.000118911	0.00864368	1.39153	1.20167	0.00171444	0.00266667	1.93043
24.239	23.0886	23.178	24.2096	24.1174	23.9043	24.2678	24.1946	23.9584	23.3645	24.1642	23.6865						+	LSD1-24hr_NLS-24hr				22	22	20	27.7	27.7	25.9	145.35	0	97.882	234230000	186	4	4	4	4	4	4	0.131257	0.179581	0.690758	0.495016	0.00522965	0.0355513	1.08922	0.868081	0.0380258	0.116642	0.817638
21.9316	20.8876	22.3725	21.9134	21.8876	21.7471	22.2096	22.3752	21.4874	21.0292	22.2764	21.9243						+	LSD1-24hr_NLS-24hr				9	9	9	9.4	9.4	9.4	211.87	0	31.008	60071000	56	4	4	4	4	4	4	0.104613	0.196072	0.625442	0.471198	0.000474508	0.0226016	1.16471	0.995545	0.111385	0.162679	0.735571
19.8965	19.4587	17.4775	19.4004	20.2764	20.4066	20.2419	19.9459	20.5261	21.0359	21.0156	20.0156						+	LSD1-24hr_NLS-24hr			+	6	6	6	15.2	15.2	15.2	62.981	0	57.636	16925000	18	2	4	4	0	2	4	0.282024	0.205386	0.751423	0.459342	0.0769572	0.0456201	1.28536	0.801956	0.103339	0.195289	0.648612
25.5783	24.7995	25.5869	25.4266	26.1194	25.8409	25.8191	25.8834	24.1174	24.0854	23.9316	23.9225						+	LSD1-24hr_NLS-24hr			+	28	28	11	43.5	43.5	18	98.241	0	319.87	627550000	408	4	4	4	4	4	4	0.0354426	0.207426	0.547487	0.455268	3.78e-05	0.023952	1.08159	0.982921	0.0376	0.203761	0.577775
20.1825	17.5864	18.1762	18.4112	19.8847	20.1703	18.4785	18.161	20.5165	21.5685	20.895	21.2477								+	LSD1-66hr_NLS-66hr	+	5	5	5	19.5	19.5	19.5	46.852	0	13.542	15280000	10	1	2	4	0	0	2	0.310216	0.217677	0.736186	0.442335	0.129558	0.113907	0.921066	0.6042	0.0574978	0.022354	1.73367
18.5805	18.9771	18.4375	18.8331	18.6311	21.0088	18.6558	20.6364	18.0319	18.7891	18.3277	18.6731						+	LSD1-24hr_NLS-24hr				2	2	2	19.4	19.4	19.4	18.885	0.0035828	2.9558	8727400	6	3	4	4	2	3	4	0.199505	0.222539	0.62055	0.43381	0.0674815	0.0311419	1.52223	0.904297	0.832122	0.91141	-0.0524483
20.654	20.5731	20.8876	21.2419	20.9601	20.8576	21.8987	21.7348	20.4676	20.0292	20.9672	20.5165						+	LSD1-24hr_NLS-24hr	+	LSD1-66hr_NLS-66hr		9	9	9	9.8	9.8	9.8	151.82	0	36.537	30692000	28	4	4	4	4	4	1	0.0604254	0.236794	0.508604	0.416767	0.00969048	0.0313655	1.19281	0.904023	0.00830907	0.00161468	2.42709
22.5983	22.5237	23.3376	22.7161	23.211	23.4298	23.7389	23.6757	22.9006	23.0526	23.5638	23.6757								+	LSD1-66hr_NLS-66hr		26	26	10	19.2	19.2	6.2	258.13	0	120.82	152950000	179	4	4	4	4	4	4	0.0538761	0.262343	0.467973	0.391401	0.0144793	0.0798304	0.852783	0.681817	0.017436	0.0280996	1.33886
19.9068	19.6111	20.1332	19.8144	19.8253	19.9459	19.7521	20.0156	17.3037	17.9028	18.0534	18.2676						+	LSD1-24hr_NLS-24hr			+	3	3	3	3.3	3.3	3.3	126.84	0	6.3874	10747000	8	3	4	0	3	2	0	0.2115	0.295423	0.486428	0.360892	0.0443671	0.0435376	1.20189	0.815348	1	1	0
18.1511	19.4894	21.1765	19.9882	20.3211	19.8787	20.1825	20.3211	21.3484	21.265	21.8764	20.9316								+	LSD1-66hr_NLS-66hr	+	7	7	7	8	8	8	171.75	0	17.482	23646000	22	3	4	4	3	4	3	0.431421	0.319304	0.558395	0.335937	0.000385611	0.055874	0.860854	0.768018	0.00548435	0.0117622	1.55018
21.5498	21.2361	21.9024	21.7265	21.1765	21.0821	20.6627	21.2707	21.7915	21.8113	22.1519	22.1143								+	LSD1-66hr_NLS-66hr		7	7	7	23.3	23.3	23.3	47.807	0	39.922	44677000	46	4	4	4	4	4	4	0.0671534	0.32685	0.385068	0.328393	0.00330243	0.0517973	0.931191	0.777395	0.000393738	0.0016	1.86412
20.9098	20.6276	21.5638	20.8346	21.2302	21.0886	21.0951	21.0493	16.8317	17.167	18.0902	18.4461						+	LSD1-24hr_NLS-24hr			+	4	4	4	44.1	44.1	44.1	13.81	0	8.6403	23962000	31	4	4	0	4	4	0	0.153044	0.339633	0.394353	0.317742	0.00115792	0.0412657	0.971998	0.832356	1	1	0
20.8727	21.0493	20.895	21.502	20.8191	20.5069	20.5545	20.9316	20.5638	20.4066	20.6276	20.714								+	LSD1-66hr_NLS-66hr		7	7	7	33.4	33.4	33.4	45.23	0	21.255	29270000	25	4	4	4	4	3	1	0.124399	0.338705	0.385803	0.317257	0.22649	0.15735	0.836063	0.515936	0.0135269	0.00462015	2.22534
18.5928	17.9552	20.0292	17.8401	19.4293	17.7023	19.853	20.002	17.5553	18.9507	16.7129	18.6951						+	LSD1-24hr_NLS-24hr				2	2	2	2.7	2.7	2.7	120.23	0.0035814	2.9458	6689100	6	1	3	0	0	0	0	0.459754	0.372775	0.459252	0.290383	0.046909	0.0213509	1.75268	1.02931	1	1	0
26.1546	25.5404	26.7389	26.1312	25.8288	25.8623	25.8457	26.0772	25.9628	26.0464	26.3578	25.8881								+	LSD1-66hr_NLS-66hr		27	27	26	53.5	53.5	50.7	61.015	0	276.48	1090400000	507	4	4	4	4	4	4	0.209617	0.374794	0.363368	0.288703	0.00773856	0.204707	0.51983	0.459064	0.00246314	0.0363472	1.07836
23.5404	22.3699	23.632	23.3778	23.2463	23.1363	23.2332	23.2961	21.3962	21.6141	21.6886	21.4825						+	LSD1-24hr_NLS-24hr			+	18	18	18	27.6	27.6	27.6	100.03	0	146.34	120820000	128	4	4	4	4	4	4	0.268838	0.378763	0.372693	0.285389	0.00220213	0.0341677	1.05928	0.877365	0.00389834	0.120682	0.71557
18.1994	17.9826	18.1801	19.1079	22.976	22.5545	22.9777	23.7182	22.9812	22.7307	22.9261	23.391						+	LSD1-24hr_NLS-24hr	+	LSD1-66hr_NLS-66hr	+	19	19	19	31	31	31	126.34	0	62.839	63138000	88	4	4	4	0	4	4	0.486495	0.38751	0.447165	0.278919	7.25e-06	0	3.86724	3.04496	5.48e-07	0	4.64309
20.714	21.265	20.7715	21.3156	21.3101	20.2535	20.9742	21.5069	21.8307	21.0625	21.6186	21.9601						+	LSD1-24hr_NLS-24hr	+	LSD1-66hr_NLS-66hr		6	6	6	24	24	24	49.536	0	10.392	34563000	32	4	4	4	4	4	0	0.159201	0.405428	0.321964	0.268222	0.0336435	0.0244211	1.4706	0.95723	0.000202687	0.00113043	3.42957
26.228	26.019	26.2803	26.4754	25.8973	25.6865	26.1852	26.4536	22.9406	23.1856	23.3645	23.5045								+	LSD1-66hr_NLS-66hr	+	54	54	54	43.1	43.1	43.1	213.01	0	323.31	867930000	612	4	4	4	4	4	4	0.0734315	0.427141	0.287148	0.253542	0.00495158	0.0888927	0.777082	0.658744	0.047364	0.00960947	2.25957
19.6903	19.4046	19.4972	19.3473	20.1581	19.4375	20.5451	20.6276	19.6766	18.5469	20.265	20.3211						+	LSD1-24hr_NLS-24hr				6	5	5	10.9	9.9	9.9	103.72	0	56.996	15807000	15	4	4	3	4	4	4	0.0964619	0.436942	0.283845	0.248085	0.0106544	0.0484044	1.01125	0.792055	0.30617	0.355976	0.46517
21.3156	21.6714	21.8461	21.0559	20.4874	21.0559	21.3484	20.3857	21.0224	21.9916	20.5545	20.9316						+	LSD1-24hr_NLS-24hr				8	8	8	3.2	3.2	3.2	499.1	0	16.808	34104000	33	4	4	4	4	3	3	0.456404	0.475124	0.31416	0.225251	0.0182703	0.016169	1.60977	1.07259	0.0650608	0.0518219	1.30243
19.3365	19.1675	17.3513	17.6985	18.5673	17.6936	19.7731	19.5601	19.2832	18.8489	19.3516	19.1382								+	LSD1-66hr_NLS-66hr		3	3	3	4.3	4.3	4.3	164.39	0	5.5805	6232100	12	1	2	3	0	0	1	0.604895	0.504347	0.337145	0.208407	0.279855	0.249314	0.602576	0.399752	0.0223436	0.029377	1.33668
20.2764	20.4576	20.5451	20.4273	20.0821	19.9601	20.0156	20.3211	19.7207	20.1946	19.816	19.6132								+	LSD1-66hr_NLS-66hr		6	6	6	28.8	28.8	28.8	35.942	0	22.708	19108000	25	4	4	4	4	4	1	0.136717	0.560006	0.201238	0.180131	0.14085	0.557361	0.183905	0.165913	0.0228558	0.0484806	1.16817
20.8113	20.4273	20.7634	20.3962	20.5165	20.7471	20.2877	20.1825	20.7307	20.654	20.5261	20.4273								+	LSD1-66hr_NLS-66hr		4	4	4	30.6	30.6	30.6	17.66	0	44.794	23627000	24	4	4	4	4	4	1	0.515781	0.774078	0.103731	0.0901806	0.164016	0.431033	0.272701	0.232674	0.0138209	0.00892121	1.85153
19.5088	19.6954	18.3988	17.1787	19.6204	19.6078	19.7812	19.9112	16.4248	17.5751	19.1155	19.4066						+	LSD1-24hr_NLS-24hr				4	4	4	6.7	6.7	6.7	119.73	0	8.1381	9580300	6	2	4	2	1	1	0	0.892954	0.849641	0.1097	0.0615788	0.0833309	0.0385354	1.43587	0.848599	0.714922	0.633696	0.276193
21.4526	20.6186	19.6078	21.8346	22.0821	23.8481	21.8987	22.5141	22.6562	23.1612	22.0292	24.5869						+	LSD1-24hr_NLS-24hr			+	8	8	8	17	17	17	64.988	0	99.007	96338000	58	4	4	4	4	4	4	0.905128	0.882269	0.0776906	0.0478108	0.0433936	0.0438177	1.18572	0.80954	0.3946	0.340383	0.536848
20.9531	20.3752	20.654	20.9171	20.417	20.2185	20.0821	20.0691	18.3123	16.9733	17.8948	17.1273						+	LSD1-24hr_NLS-24hr			+	4	4	4	16.5	16.5	16.5	38.216	0	35.136	16094000	25	4	4	0	4	1	0	0.900258	0.944275	0.0301294	0.0244863	0.00666596	0.00338931	2.14415	1.40289	1	1	0
19.7439	18.8947	17.6644	18.0354	20.3857	20.1946	21.3101	20.7876	20.1703	18.4875	19.9068	20.5356								+	LSD1-66hr_NLS-66hr	+	5	5	5	21.7	21.7	21.7	44.363	0	13.342	18129000	12	1	4	3	0	3	0	0.996714	0.995727	0.00223923	0.00147153	0.0726579	0.103665	0.870794	0.621754	0.0277733	0.0263629	1.45027
17.9773	18.9724	19.0289	17.5578	21.2593	21.0821	18.6105	21.2764	21.4775	21.5165	21.4626	21.2244						+	LSD1-24hr_NLS-24hr	+	LSD1-66hr_NLS-66hr	+	4	4	2	8.5	8.5	5.6	95.222	0	5.5579	39471000	11	0	3	4	0	1	1	1	1	0	0	0.126718	0.0226	2.32173	1.00508	0.0384478	0.00863804	2.21633
17.8198	18.1461	18.0452	17.6986	18.4402	18.321	18.3522	19.9127	19.4129	19.6042	20.002	19.5878								+	LSD1-66hr_NLS-66hr	+	3	3	3	3.2	3.2	3.2	109.85	0	4.3995	4292300	5	0	1	4	0	0	0	1	1	0	0	0.0819035	0.0800717	1.01407	0.682496	0.000409702	0.00187234	1.97578
18.1743	17.8424	17.7821	17.4585	19.4354	17.9918	19.4933	19.7106	21.4324	20.0691	21.1015	21.7755								+	LSD1-66hr_NLS-66hr	+	8	8	8	9.2	9.2	9.2	144.99	0	15.718	13298000	14	0	3	4	0	1	3	1	1	0	0	0.206446	0.141053	0.875954	0.541221	0.0199839	0.0206267	1.50864
17.6174	18.1355	17.7286	18.8795	19.5582	19.0506	17.3351	19.4375	21.68	22.1488	21.6584	21.9171								+	LSD1-66hr_NLS-66hr	+	5	5	5	10.7	10.7	10.7	102.14	0	30.948	14031000	17	0	3	4	0	0	3	1	1	0	0	0.988572	0.984585	0.00971413	0.00588501	0.000281636	0.00101961	3.10129
16.9395	18.9755	18.2324	18.6894	17.6825	18.0503	18.0289	18.9024	20.4066	19.8081	20.5731	21.0493								+	LSD1-66hr_NLS-66hr	+	4	4	2	5.2	5.2	3.3	117.99	0	26.436	5083700	8	0	0	4	0	0	0	1	1	0	0	1	1	0	0	0.00177293	0.002	2.34713
16.9944	18.8042	18.4945	19.8325	17.8932	17.8582	17.3798	18.7425	21.4375	19.9601	21.9098	20.6186								+	LSD1-66hr_NLS-66hr	+	7	7	7	13.8	13.8	13.8	83.125	0	15.905	8526200	16	0	0	4	0	0	3	1	1	0	0	1	1	0	0	0.00237514	0.00179592	2.19733
18.2051	19.4475	19.4887	17.2292	17.5494	17.6805	19.327	18.5761	20.0691	20.2989	20.0821	20.1079								+	LSD1-66hr_NLS-66hr	+	3	3	3	10.6	10.6	10.6	47.379	0	3.8721	7482000	5	0	0	4	0	0	0	1	1	0	0	1	1	0	0	0.00222705	0.00162963	2.12716
17.0942	18.4794	18.0181	16.388	17.6352	17.7412	17.1634	18.1081	20.2419	19.729	21.0088	21.8152								+	LSD1-66hr_NLS-66hr	+	7	7	6	10.5	10.5	9	118.62	0	36.436	7761600	11	0	0	4	0	0	1	1	1	0	0	1	1	0	0	0.00694011	0.00482353	1.98646
17.0167	18.3642	17.4435	17.1278	17.7241	18.4057	17.7286	18.8361	19.4854	19.6593	20.7634	20.9812								+	LSD1-66hr_NLS-66hr	+	5	4	4	2.3	2	2	406.1	0	9.0165	6231300	9	0	1	4	0	0	1	1	1	0	0	0.374402	0.331855	-0.463915	-0.312708	0.0111777	0.00955294	1.75953
18.0047	17.9321	18.6697	20.4476	19.786	18.3495	20.0292	20.3321	22.654	21.9024	23.2821	22.5356								+	LSD1-66hr_NLS-66hr	+	12	12	12	17.7	17.7	17.7	104.46	0	109.84	32543000	42	3	4	4	3	3	4	0.946199	0.938843	-0.0440331	-0.0270824	0.283425	0.123964	1.13883	0.579025	0.000930142	0.00065	2.3897
18.3667	18.1106	18.5412	17.2993	21.1765	20.5638	22.0088	22.5846	24.1871	23.8576	24.1946	24.7796						+	LSD1-24hr_NLS-24hr	+	LSD1-66hr_NLS-66hr	+	27	27	27	34.2	34.2	34.2	136.48	0	158.4	79130000	84	1	4	4	0	0	2	0.879283	0.918443	-0.0445409	-0.0347687	0.000390597	0.00195918	3.61796	2.39724	1.29e-06	0	6.34032
20.7389	17.0159	20.5069	21.4375	20.265	20.2419	20.5731	21.9061	22.3805	21.5261	23.1316	22.6453								+	LSD1-66hr_NLS-66hr	+	13	13	13	16.4	16.4	16.4	134.69	0	106.34	45695000	38	3	4	4	4	4	4	0.912744	0.858661	-0.115593	-0.0574665	0.451112	0.371238	0.429658	0.280233	0.0203631	0.0220901	1.47727
20.6453	19.9459	17.8153	21.2361	20.1946	17.024	17.8203	22.3321	20.7553	20.4476	21.4972	21.6627								+	LSD1-66hr_NLS-66hr		13	13	13	4.2	4.2	4.2	519.2	0	41.43	31612000	25	3	2	4	3	4	2	0.860875	0.780075	-0.167036	-0.0873119	0.46401	0.225389	-0.942724	-0.427402	0.0341442	0.0180296	1.72552
19.4576	18.4582	19.9882	19.8682	19.8545	21.3805	21.9243	22.8499	18.6769	17.6481	17.6831	19.5951						+	LSD1-24hr_NLS-24hr			+	7	7	7	68.7	68.7	68.7	20.356	0	35.366	25463000	26	3	4	1	3	3	0	0.691552	0.627708	-0.232522	-0.149214	0.101525	0.0381053	1.52697	0.852937	0.37619	0.367437	-0.469626
18.9054	18.0346	17.998	18.2683	18.9431	18.9141	17.2961	18.9112	19.2042	19.2945	19.3941	19.0129								+	LSD1-66hr_NLS-66hr		2	2	2	29.1	29.1	29.1	17.993	0	12.435	6330500	9	1	3	4	3	1	0	0.506622	0.627145	-0.190492	-0.150018	0.266291	0.242351	0.608611	0.40666	0.00168939	0.01722	1.32516
20.1825	19.8712	20.6453	20.6186	20.2535	20.0559	20.3752	21.3156	19.2057	19.657	19.4656	19.7955								+	LSD1-66hr_NLS-66hr		9	9	9	16.1	16.1	16.1	119.96	0	83.638	23578000	35	4	4	2	4	4	1	0.295746	0.508751	-0.250324	-0.205421	0.658276	0.705897	-0.135674	-0.105034	0.0438439	0.0383556	1.33964
20.5731	19.3277	20.4676	20.3645	20.3538	20.5356	20.1581	20.3211	19.6558	19.6818	19.5337	19.3538								+	LSD1-66hr_NLS-66hr		8	8	8	27.3	27.3	27.3	54.381	0	27.869	19521000	41	4	4	4	4	4	0	0.401903	0.469619	-0.305336	-0.228105	0.157329	0.4782	0.234446	0.204734	0.00681699	0.0184272	1.41002
18.1891	17.9648	19.9054	19.002	17.9573	20.1457	19.7005	20.654	19.3962	19.2137	18.1322	19.002						+	LSD1-24hr_NLS-24hr				4	4	4	3	3	3	260.95	0	11.78	10662000	14	2	3	3	4	0	1	0.379084	0.368438	-0.424136	-0.293165	0.0166359	0.0036	2.17068	1.30764	0.765676	0.809524	0.11787
17.1854	24.5225	17.7057	17.8926	18.7262	25.1871	25.0772	18.2096	25.7234	25.9202	17.0271	25.5551						+	LSD1-24hr_NLS-24hr	+	LSD1-66hr_NLS-66hr		3	3	3	4.8	4.8	4.8	108.49	0.001233	3.4085	550180000	9	1	2	3	2	0	1	0.463342	0.140712	-2.00445	-0.563111	0.145212	0.0149091	3.27796	1.10798	0.273401	0.036289	3.4021
17.2232	17.0951	17.5819	16.3598	17.3949	17.7359	18.3611	17.9235	21.4775	20.4375	23.4676	23.1673				+	LSD1-0hr_NLS-0hr			+	LSD1-66hr_NLS-66hr	+	12	12	12	15.1	15.1	15.1	162.34	0	84.846	24354000	44	3	0	4	0	0	4	0.00961149	0.0399707	-1.20671	-0.9124	1	1	0	0	0.0272053	0.00784416	2.13098
[truncated: 10 more columns]
