# Supplementary material for: Proximity-dependent biotin identification (BioID) reveals a dynamic LSD1–CoREST interactome during embryonic stem cell differentiation
Source: Mol Omics. 2021 Oct 14;18(1):31–44. doi: 10.1039/d1mo00236h (PMC8763317; doi:10.1039/d1mo00236h)
Supplement: MO-018-D1MO00236H-s004 [file MO-018-D1MO00236H-s004.xlsx]

## Sheet: ESCandHEKoverlapping_251018
	LSD1 interacting proteins - ES cells and 293T				ES cells															293T cells
	Gene.names	Protein.IDs	Protein.names	id	ESC_0hr	Student.s.T.test.significant	ESC_24hr	Student.s.T.test.significant_	ESC_66hr	Student.s.T.test.significant__	Student.s.T.test.p.value.LSD1.0hr_NLS.0hr	Student.s.T.test.Difference.LSD1.0hr_NLS.0hr	Student.s.T.test.Test.statistic.LSD1.0hr_NLS.0hr	Student.s.T.test.p.value.LSD1.24hr_NLS.24hr	Student.s.T.test.Difference.LSD1.24hr_NLS.24hr	Student.s.T.test.Test.statistic.LSD1.24hr_NLS.24hr	Student.s.T.test.p.value.LSD1.66hr_NLS.66hr	Student.s.T.test.Difference.LSD1.66hr_NLS.66hr	Student.s.T.test.Test.statistic.LSD1.66hr_NLS.66hr	LSD1_significant	LSD1_.Log.Student.s.T.test.p.value.LFQ.intensity.LSD1_LFQ.intensity.NLS	LSD1_Student.s.T.test.Difference.LFQ.intensity.LSD1_LFQ.intensity.NLS	LSD1_Student.s.T.test.Test.statistic.LFQ.intensity.LSD1_LFQ.intensity.NLS
	AIMP1	Q3UZG4;P31230;A0A0G2JDH0;A0A0G2JEU9;A0A0G2JDV0;A0A0G2JDW6	Aminoacyl tRNA synthase complex-interacting multifunctional protein 1;Endothelial monocyte-activating polypeptide 2	1050			+	LSD1-24hr_NLS-24hr			0.186508	1.17059	0.420319	0.179903	1.68752	0.542271	0.684953	-0.295815	-0.10979	+	1.5585	3.24307	1.03892
	AKAP8L	Q5RL57;Q9R0L7	A-kinase anchor protein 8-like	1553			+	LSD1-24hr_NLS-24hr	+	LSD1-66hr_NLS-66hr	0.109234	0.968938	0.385182	0.0144044	1.66614	0.669319	0.00761519	-1.595	-0.663283	+	4.21832	1.45768	0.678974
	APC	E9QLQ9;B2RUG9;Q61315;E9Q4H1;Q8C493	Adenomatous polyposis coli protein	250	+	LSD1-0hr_NLS-0hr	+	LSD1-24hr_NLS-24hr	+	LSD1-66hr_NLS-66hr	0.0127845	2.0519	0.793524	0.0294971	1.55644	0.610922	0.000531309	2.93811	1.20527	+	3.03312	2.1807	0.923757
	ARID5B	Q8BM75	AT-rich interactive domain-containing protein 5B	1942	+	LSD1-0hr_NLS-0hr	+	LSD1-24hr_NLS-24hr	+	LSD1-66hr_NLS-66hr	0.000281864	2.66755	1.13334	0.000133926	2.54257	1.10794	0.00948427	3.19421	1.12028	+	1.63628	0.992195	0.426295
	BUB1	A2APR8;O08901	Mitotic checkpoint serine/threonine-protein kinase BUB1	156			+	LSD1-24hr_NLS-24hr			0.892954	0.1097	0.0394397	0.0833309	1.43587	0.533375	0.714922	0.276193	0.101499	+	2.96332	3.03292	1.20485
	CEP131	B1AXI9;J3QMP9;Q62036	Centrosomal protein of 131 kDa	231			+	LSD1-24hr_NLS-24hr			0.459754	0.459252	0.177899	0.046909	1.75268	0.648475	1	0	0	+	2.70985	2.26815	0.932096
	CHD4	E9QAS4;F6WR45;F6V4V3		589	+	LSD1-0hr_NLS-0hr	+	LSD1-24hr_NLS-24hr	+	LSD1-66hr_NLS-66hr	4.73e-05	1.65345	0.765625	3.95e-06	1.85856	0.87793	0.000128001	2.03698	0.911671	+	3.49746	1.2071	0.557907
	CHEK1	O35280;G3UYC5;G3UYB1	Serine/threonine-protein kinase Chk1	846					+	LSD1-66hr_NLS-66hr	0.401903	-0.305336	-0.130565	0.157329	0.234446	0.109293	0.00681699	1.41002	0.60022	+	2.82952	0.99327	0.455671
	CTBP1	O88712	C-terminal-binding protein 1	903	+	LSD1-0hr_NLS-0hr	+	LSD1-24hr_NLS-24hr	+	LSD1-66hr_NLS-66hr	0.000248983	2.74093	1.1637	0.00112386	4.20665	1.54548	1.45e-05	5.45327	2.24507	+	1.07465	1.39832	0.522461
	DSP	E9Q557;E9PZW0	Desmoplakin	530	+	LSD1-0hr_NLS-0hr					0.025189	2.54831	0.890992	0.532043	1.21124	0.316474	0.897012	0.0536103	0.0223651	+	2.69667	1.66903	0.71915
	GSE1	Q3U3C9	Genetic suppressor element 1	1457	+	LSD1-0hr_NLS-0hr	+	LSD1-24hr_NLS-24hr	+	LSD1-66hr_NLS-66hr	7.95e-07	7.74437	3.26542	2.12e-06	7.65241	3.1449	6.42e-06	7.99554	3.13954	+	4.63358	4.57594	1.91434
	HDAC2	P70288;Q8BQ10	Histone deacetylase 2	1289	+	LSD1-0hr_NLS-0hr	+	LSD1-24hr_NLS-24hr	+	LSD1-66hr_NLS-66hr	3.11e-05	4.5387	1.88549	1.19e-05	5.41774	2.24621	3.67e-06	4.30274	1.89752	+	3.0557	1.05998	0.487662
	HMG20B	Q9Z104;F7AVN4;Q05DT2;E9Q2W1	SWI/SNF-related matrix-associated actin-dependent regulator of chromatin subfamily E member 1-related	2723	+	LSD1-0hr_NLS-0hr	+	LSD1-24hr_NLS-24hr	+	LSD1-66hr_NLS-66hr	1.36e-06	8.12641	3.34864	4.97e-07	8.06937	3.4225	1.41e-05	7.15826	2.79635	+	5.84841	3.70444	1.6869
	HOMEZ	Q80W88;H3BL46	Homeobox and leucine zipper protein Homez	1855	+	LSD1-0hr_NLS-0hr	+	LSD1-24hr_NLS-24hr	+	LSD1-66hr_NLS-66hr	0.0150886	2.13317	0.810027	0.0307391	1.84274	0.693887	8.8e-05	2.16481	0.969453	+	2.68084	1.90774	0.805164
	KDM1A	Q6ZQ88;A3KG93;G8JL40;F6Z4I3;F6ZC60	Lysine-specific histone demethylase 1A	1788	+	LSD1-0hr_NLS-0hr	+	LSD1-24hr_NLS-24hr	+	LSD1-66hr_NLS-66hr	1.71e-05	10.0945	3.58413	2.24e-05	9.93399	3.4953	3.69e-05	10.4486	3.52292	+	4.86341	10.3066	3.67761
	L3MBTL3	Q8BLB7	Lethal(3)malignant brain tumor-like protein 3	1940	+	LSD1-0hr_NLS-0hr	+	LSD1-24hr_NLS-24hr	+	LSD1-66hr_NLS-66hr	3.71e-06	5.84894	2.47392	1.11e-06	6.75164	2.88197	5.03e-06	6.8659	2.80199	+	2.56986	1.98655	0.826057
	LIN9	Q8C735;A0A0A6YVZ7;A0A0A6YWD3;A0A0A6YWF7	Protein lin-9 homolog	2014	+	LSD1-0hr_NLS-0hr	+	LSD1-24hr_NLS-24hr	+	LSD1-66hr_NLS-66hr	0.00142072	1.94517	0.827989	0.00053035	2.67029	1.11369	0.0407941	1.74209	0.652308	+	1.82409	0.97984	0.427779
	LMAN1	Q9D0F3;D3Z5B9	Protein ERGIC-53	2469	+	LSD1-0hr_NLS-0hr					0.00425346	1.6737	0.704796	0.126694	1.42777	0.508912	0.0581435	0.561631	0.250683	+	1.3739	2.15316	0.75883
	MECOM	G3UZT5;P14404;O35700;G3UYK2;G3UWT0;G3UZ13;Q8CCA6;G3UWJ0	MDS1 and EVI1 complex locus protein EVI1	743					+	LSD1-66hr_NLS-66hr	1	0	0	1	0	0	0.00177293	2.34713	0.961898	+	1.35912	1.77579	0.658297
	MYBL2	P48972;A2A5P3	Myb-related protein B	1123	+	LSD1-0hr_NLS-0hr	+	LSD1-24hr_NLS-24hr	+	LSD1-66hr_NLS-66hr	1.68e-06	2.80918	1.30478	1.44e-07	2.93185	1.39247	0.00688708	2.15209	0.849242	+	4.2786	1.21646	0.573904
	PHF21A	A2AHG4;A2AHG2;E9QKW9;E9PV92;Q6ZPK0;A2AHG3;D3Z764;F6URE6;F6TKP4;F6U6L3;F6TL54;E0CZ79;E0CYN5;E0CZ36	PHD finger protein 21A	125	+	LSD1-0hr_NLS-0hr	+	LSD1-24hr_NLS-24hr	+	LSD1-66hr_NLS-66hr	5.47e-07	9.60868	3.94948	5.68e-07	8.82467	3.67683	3.15e-05	7.93522	2.92427	+	3.00909	3.75853	1.43006
	PLEC	E9Q3W4;Q9QXS1;F6R059;Q8R0W0	Plectin	518			+	LSD1-24hr_NLS-24hr			0.456404	0.31416	0.131189	0.0182703	1.60977	0.643694	0.0650608	1.30243	0.505254	+	1.97345	2.92241	1.04396
	PRDM2	A2A7B5		91	+	LSD1-0hr_NLS-0hr	+	LSD1-24hr_NLS-24hr	+	LSD1-66hr_NLS-66hr	2.37e-05	6.2462	2.46434	0.000131261	5.87797	2.19389	5.98e-07	6.5935	2.86483	+	0.89002	1.23896	0.458233
	RANBP2	Q9ERU9	E3 SUMO-protein ligase RanBP2	2593			+	LSD1-24hr_NLS-24hr			0.00102531	0.991053	0.457315	1.12e-05	1.151	0.551615	0.000182965	0.823567	0.391989	+	4.88404	1.63508	0.768986
	RBBP8	Q80YR6	DNA endonuclease RBBP8	1870	+	LSD1-0hr_NLS-0hr	+	LSD1-24hr_NLS-24hr	+	LSD1-66hr_NLS-66hr	0.0135876	2.21994	0.839946	3e-05	2.28099	1.03522	0.000373755	2.51614	1.07011	+	2.22479	3.28636	1.17773
	RCOR1	K3W4P9;Q8CFE3	REST corepressor 1	814	+	LSD1-0hr_NLS-0hr	+	LSD1-24hr_NLS-24hr	+	LSD1-66hr_NLS-66hr	1.22e-06	11.4991	4.43373	1.46e-05	10.7651	3.78017	2.71e-07	11.5931	4.70473	+	3.12897	4.88303	1.75991
	RCOR2	Q8C796;D3YUX3	REST corepressor 2	2015	+	LSD1-0hr_NLS-0hr	+	LSD1-24hr_NLS-24hr	+	LSD1-66hr_NLS-66hr	1.13e-06	6.907	2.93684	8.41e-08	7.0613	3.16325	4.03e-06	6.74504	2.78021	+	3.85968	2.96478	1.2639
	RCOR3	A0A0A6YXM5;A0A0A6YWP7;A0A0A6YWY4;A0A0A6YXP4;A0A0A6YX54;A0A0A6YXI3	RESR corepressor 3	47	+	LSD1-0hr_NLS-0hr	+	LSD1-24hr_NLS-24hr	+	LSD1-66hr_NLS-66hr	8.69e-07	7.06461	3.01372	3.25e-06	7.09162	2.91606	1.37e-07	7.56623	3.33297	+	3.52257	7.12546	2.41073
	RLF	A2A7F4;E9Q532;A2A7F3		92	+	LSD1-0hr_NLS-0hr	+	LSD1-24hr_NLS-24hr	+	LSD1-66hr_NLS-66hr	0.00642534	3.40799	1.2029	0.00728464	3.39411	1.18974	0.00193831	2.17194	0.899543	+	1.31769	1.10925	0.453099
	RREB1	Q3UH06	Ras-responsive element-binding protein 1	1475	+	LSD1-0hr_NLS-0hr	+	LSD1-24hr_NLS-24hr	+	LSD1-66hr_NLS-66hr	1.21e-06	10.3906	4.09793	0.000351583	9.61732	2.89006	4.16e-05	7.83911	2.8613	+	4.17016	3.58536	1.51384
	SAMD1	D3YXK1	Atherin	347	+	LSD1-0hr_NLS-0hr	+	LSD1-24hr_NLS-24hr	+	LSD1-66hr_NLS-66hr	0.00224112	2.96479	1.14809	0.000376663	3.87803	1.52547	7.9e-05	4.14586	1.70064	+	2.96306	1.51364	0.670291
	SFMBT1	Q9JMD1;E9Q354;F6W207	Scm-like with four MBT domains protein 1	2638	+	LSD1-0hr_NLS-0hr	+	LSD1-24hr_NLS-24hr	+	LSD1-66hr_NLS-66hr	1.61e-08	6.94646	3.19628	1.9e-06	7.61913	3.14368	6.7e-05	8.37915	2.93011	+	4.99356	5.74896	2.37052
	TET1	E9Q9Y4;Q3URK3;G3UZ35;G3UXI7	Methylcytosine dioxygenase TET1	581					+	LSD1-66hr_NLS-66hr	0.064775	0.850327	0.35778	0.396436	0.313539	0.133796	0.020357	1.50176	0.60555	+	1.65596	1.79272	0.693538
	TRPS1	G3UW90;V9GX74;V9GXA5;Q925H1;Q80V18;V9GXE9;Q8BZ62;V9GX39	Zinc finger transcription factor Trps1	716	+	LSD1-0hr_NLS-0hr	+	LSD1-24hr_NLS-24hr	+	LSD1-66hr_NLS-66hr	0.000331534	1.65465	0.743329	0.00240745	1.86139	0.785099	0.00155228	1.65908	0.720371	+	2.74148	1.6934	0.730247
	TSHZ3	Q8CGV9;Q8K350;A0A087WS38;A0A0A0MQI3;Q68FE9	Teashirt homolog 3	2051					+	LSD1-66hr_NLS-66hr	1	0	0	1	0	0	0.00694011	1.98646	0.796542	+	3.80676	1.53341	0.702512
	ZBTB1	Q91VL9	Zinc finger and BTB domain-containing protein 1	2208			+	LSD1-24hr_NLS-24hr	+	LSD1-66hr_NLS-66hr	0.00782504	1.24608	0.537548	0.054903	1.6738	0.619052	0.010439	1.62496	0.665252	+	3.16219	2.31598	0.98046
	ZBTB21	E9Q3R9;E9Q444;G3X9A3	Zinc finger and BTB domain-containing protein 21	516			+	LSD1-24hr_NLS-24hr	+	LSD1-66hr_NLS-66hr	8.08e-05	1.13978	0.537415	5.15e-06	1.57398	0.748205	0.000378224	1.85198	0.81978	+	3.88249	1.0345	0.488083
	ZBTB33	Q8BN78;A2A3Z2	Transcriptional regulator Kaiso	1952			+	LSD1-24hr_NLS-24hr	+	LSD1-66hr_NLS-66hr	0.0680221	0.650462	0.283703	0.000118911	1.39153	0.644823	0.00171444	1.93043	0.818119	+	4.37747	2.07854	0.946322
	ZEB2	H9H9S3;Q9R0G7;H3BKH5	Zinc finger E-box-binding homeobox 2	795			+	LSD1-24hr_NLS-24hr	+	LSD1-66hr_NLS-66hr	0.879283	-0.0445409	-0.0195264	0.000390597	3.61796	1.44187	1.29e-06	6.34032	2.72107	+	1.59401	1.37223	0.556806
	ZMYM2	Q9CU65	Zinc finger MYM-type protein 2	2415	+	LSD1-0hr_NLS-0hr	+	LSD1-24hr_NLS-24hr	+	LSD1-66hr_NLS-66hr	3.83e-08	6.31882	2.89558	1.17e-06	6.47215	2.77622	2.44e-07	6.38358	2.83582	+	4.94804	2.72791	1.23691
	ZMYM3	B1AXS7;Q9JLM4;B1AXS8;B1AXS6;B0R077;Q8CG95;Q32P02	Zinc finger MYM-type protein 3	233	+	LSD1-0hr_NLS-0hr	+	LSD1-24hr_NLS-24hr	+	LSD1-66hr_NLS-66hr	5.94e-06	8.04961	3.16509	4.07e-06	6.22014	2.59862	3.22e-07	7.65673	3.30672	+	3.49159	1.95674	0.863561
	ZNF516	Q7TSH3	Zinc finger protein 516	1830	+	LSD1-0hr_NLS-0hr	+	LSD1-24hr_NLS-24hr	+	LSD1-66hr_NLS-66hr	9.35e-08	5.22866	2.40388	3.59e-07	5.54161	2.48213	6.83e-06	5.46878	2.29974	+	4.86356	4.57038	1.94001
	ZNF592	Q8BHZ4	Zinc finger protein 592	1917	+	LSD1-0hr_NLS-0hr	+	LSD1-24hr_NLS-24hr	+	LSD1-66hr_NLS-66hr	5.95e-05	4.39848	1.80126	8.68e-05	3.61467	1.51357	0.000461748	2.15998	0.933628	+	2.62528	1.93334	0.810958
